# Supplementary material for: Genome-Based Analysis of Verticillium Polyketide Synthase Gene Clusters
Source: MDPI journal article supplement (doi:10.3390/biology11091252), 2022-08-23
Supplement: s1 [file s1]

**Supplementary Figure S1.** Neighbor-joining tree inferred from nucleotide sequences of Polyketide Synthase-III coding regions of *Verticillium* species as well as PKS-III sequences obtained from other Ascomycetes. GenBank accession numbers for each sequence are provided. Similar groups were obtained with the maximum likelihood analysis. In this analysis we used 1000 bootstrap repeats as indicated at the internodes

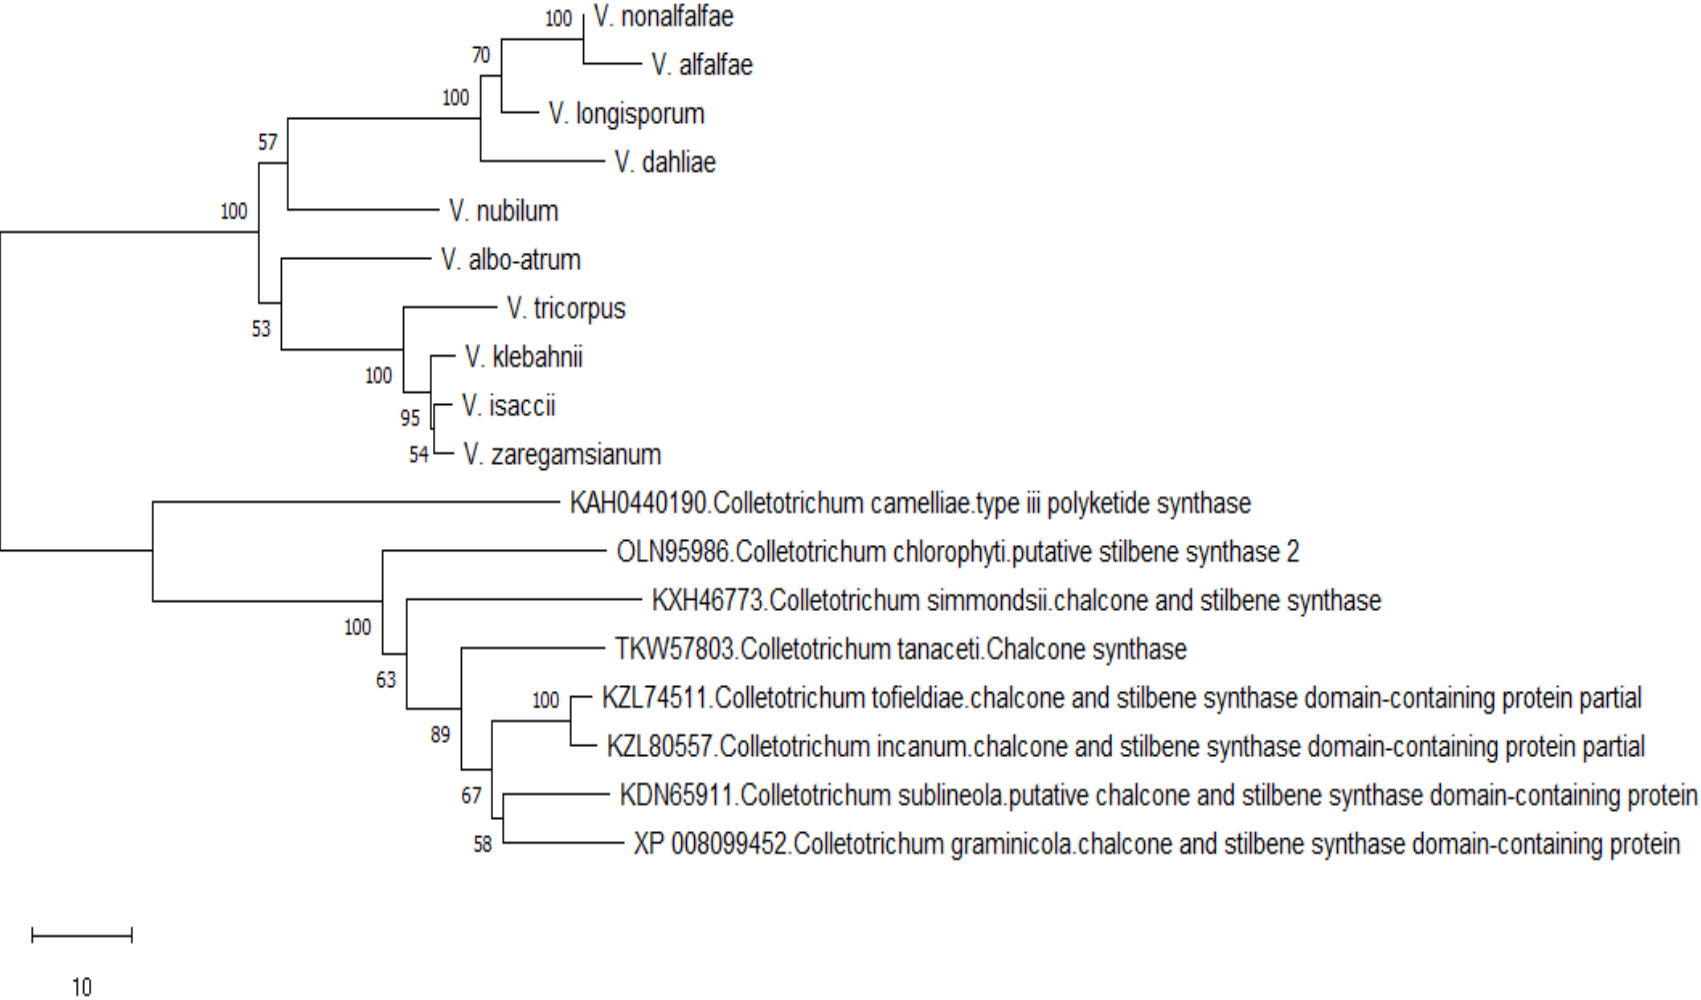

**Supplementary Figure S2.** Comparison of putative cluster genes for Verticillium VRPKS-I-21 found in *V. zaregamsianum*, *V. klebahnii* and *V. nubilum* and the alternapyrone biosynthesis gene cluster of *Alternaria alternata*. The arrowheads indicate direction of transcription and types of genes common between the two clusters being compared are displayed in the same color. Shaded lines represent similarities between nucleotide sequences.

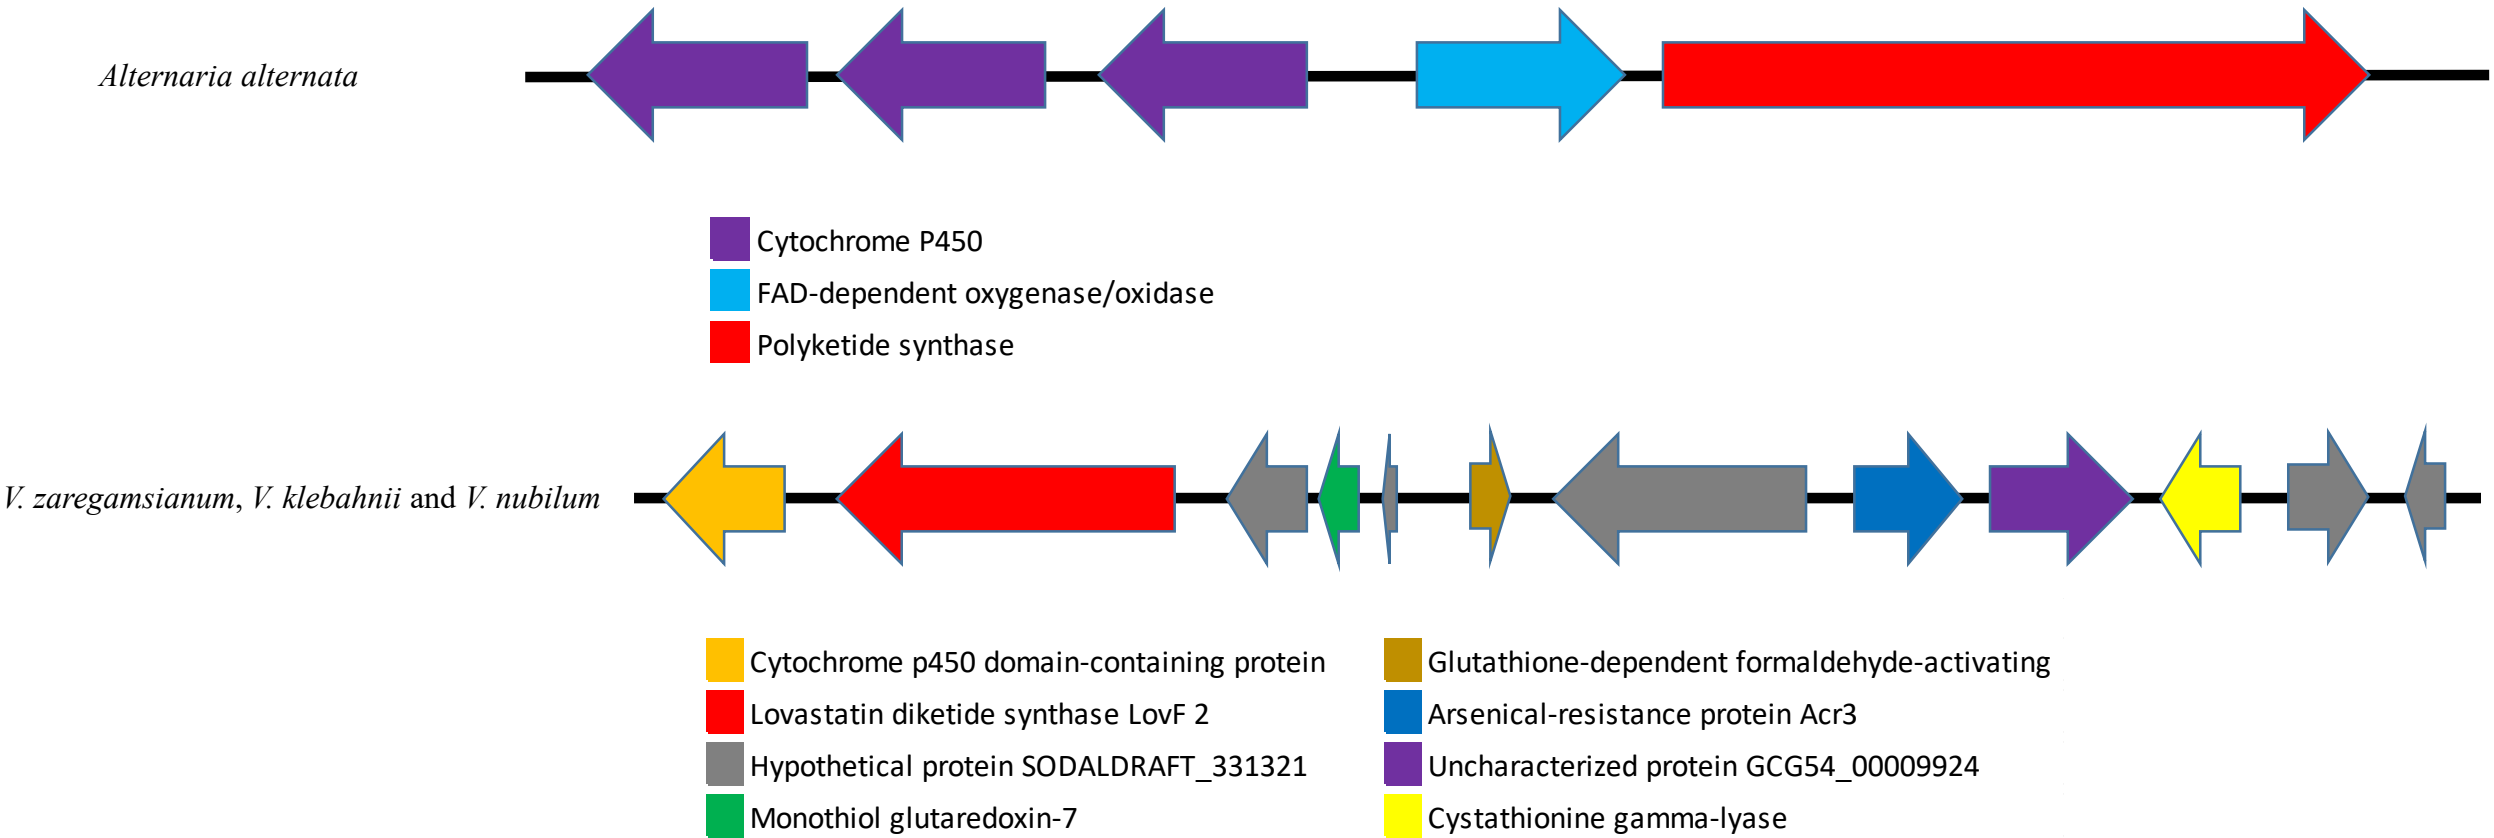

**Supplementary Figure S3.** Comparison of putative cluster genes for VRPKS-I-22 locus found in the genomes of *V. dahliae*, *V. longisporum*, *V. alfalfa* and *V. nonalfalfae* and fusaric acid gene cluster. The arrowheads indicate direction of transcription and types of genes common between the two clusters being compared are displayed in the same color. Shaded lines represent similarities between nucleotide sequences.

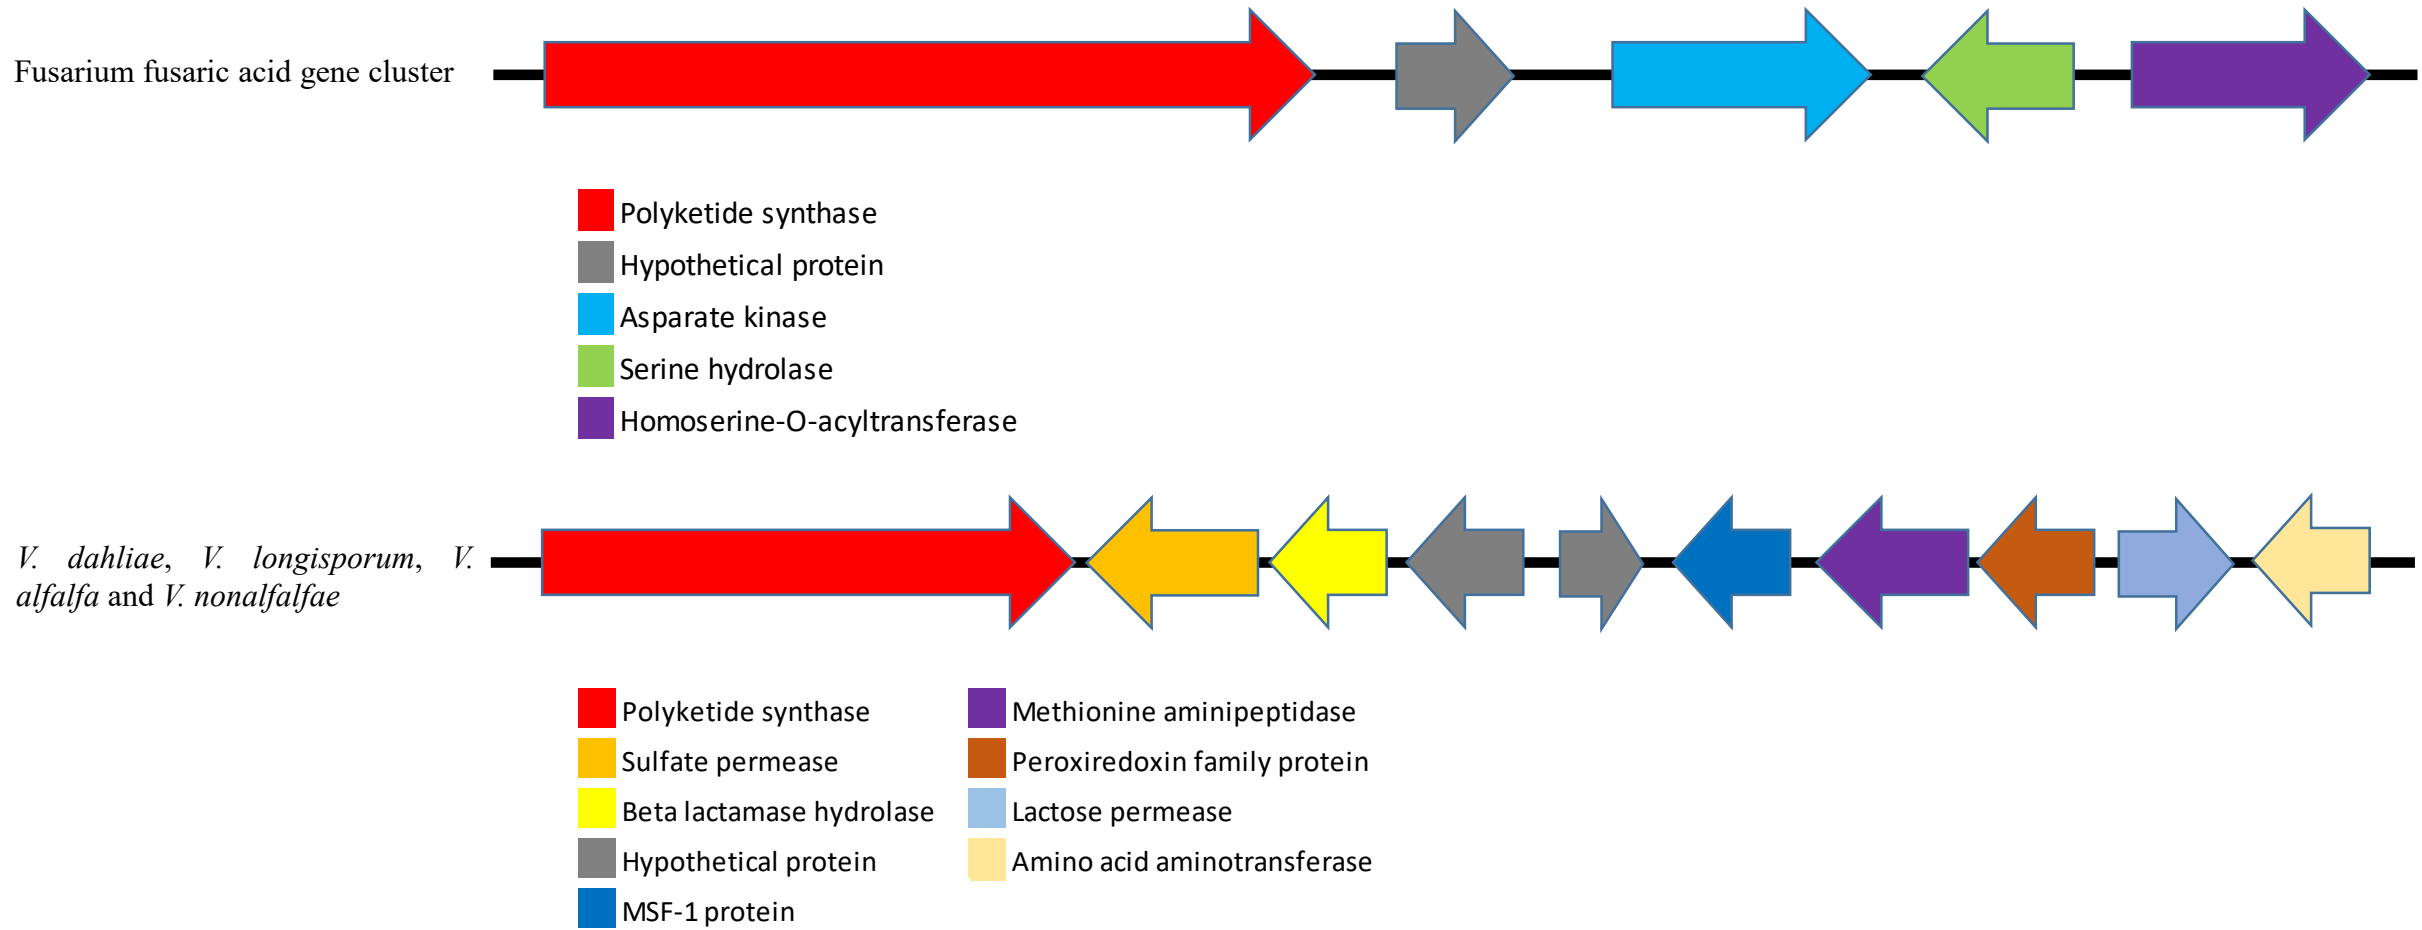

**SUPPLEMENTARY FILE S1.** The tables below show the predicted Polyketide synthase (PKS) gene clusters in all examined *Verticillium* genomes.

**1) *Verticillium dahliae* contig NW\_009276940, VRPKS-I-22 cluster**

| Gene name                           | Size | E value | % Coverage | % identity | Top blast hit                     | Accession number of top blast hit |
|-------------------------------------|------|---------|------------|------------|-----------------------------------|-----------------------------------|
| RNA polymerase associated protein   | 610  | 0       | 100        | 60.39      | <i>Colletotrichum chlorophyti</i> | OLN85623                          |
| Uniquinone biosynthesis protein     | 244  | 0       | 100        | 76.42      | <i>Colletotrichum tofieldiae</i>  | KZL76982                          |
| Phospholipase D1                    | 1819 | 0       | 100        | 72.86      | <i>Sodiomyces alkalinus</i>       | XP_028463305                      |
| Tubulin gamma chain                 | 461  | 0       | 100        | 94.14      | <i>Fusarium oxysporum</i>         | EGU82165                          |
| Gamma tubulin                       | 93   | 4e-37   | 94         | 73.86      | <i>Pseudomassariella vexata</i>   | XP_040719305                      |
| Hypothetical protein                | 851  | 2e-10   | 14         | 37.88      | <i>Sodiomyces alkalinus</i>       | XP_028463302                      |
| Putative uridine kinase             | 192  | 2e-78   | 100        | 53.97      | <i>Colletotrichum camelliae</i>   | KAG2083351                        |
| Oxidoreductase                      | 345  | 9e-132  | 98         | 56.10      | <i>Fusarium proliferatum</i>      | RBA11051                          |
| Major facilitator transporter (MFS) | 229  | 1e-110  | 99         | 74.45      | <i>Colletotrichum graminicola</i> | XP_008093595                      |
| FAD dependent monooxygenase         | 404  | 1e-177  | 89         | 68.06      | <i>Bimuria novae-zelandiae</i>    | KAF1970089                        |
| DUF341 domain containing protein    | 207  | 1e-98   | 100        | 63.76      | <i>Fusarium napiforme</i>         | KAF5540875                        |
| UDP glucosyl transferase            | 553  | 0       | 98         | 59.19      | <i>Fusarium austroafricanum</i>   | KAF4443747                        |
| Polyketide synthase                 | 2635 | 0       | 99         | 70.93      | <i>Fusarium miscanthi</i>         | ALQ32877                          |
| Sulfate permease                    | 763  | 0       | 98         | 51.05      | <i>Trematosphaeria pertusa</i>    | XP_033684343                      |
| Beta lactamase hydrolase            | 300  | 1e-137  | 100        | 62.33      | <i>Monosporascus sp.</i>          | RYP55738                          |
| Hypothetical protein                | 371  | 1e-28   | 87         | 60         | <i>Fusarium graminearum</i>       | CZS74879                          |
| Hypothetical protein                | 153  | 2e-80   | 99         | 79.22      | <i>Colletotrichum musicola</i>    | KAF6840530                        |
| MSF-1 protein                       | 192  | 2e-121  | 98         | 85.94      | <i>Sodiomyces alkalinus</i>       | XP_028463299                      |
| Methionine aminopeptidase           | 441  | 0       | 99         | 82.99      | <i>Colletotrichum sidae</i>       | TEA17142                          |
| Peroxiredoxin family protein        | 425  | 2e-154  | 70         | 67.44      | <i>Sodiomyces alkalinus</i>       | XP_028463297                      |
| Lactose permease                    | 306  | 1e-07   | 76         | 26.05      | <i>Cadophora sp.</i>              | KAG4430930                        |
| Amino acid aminotransferase         | 425  | 0       | 100        | 75.81      | <i>Sodiomyces alkalinus</i>       | XP_028463295                      |

**2) *Verticillium dahliae* contig NW\_009276940, VRPKS-I-23 cluster**

| Gene name                                              | Size | E value | % Coverage | % identity | Top blast hit                    | Accession number of top blast hit |
|--------------------------------------------------------|------|---------|------------|------------|----------------------------------|-----------------------------------|
| Hypothetical protein                                   | 351  | 1e-51   | 99         | 34.59      | <i>Sodiomyces alkalinus</i>      | XP_028463289                      |
| Homoserine kinase                                      | 355  | 0       | 99         | 90.73      | <i>Colletotrichum tofieldiae</i> | KZL71078                          |
| Hypothetical protein                                   | 146  | 1e-96   | 100        | 100        | <i>Verticillium dahliae</i>      | XP_009656175                      |
| SnodProt1                                              | 138  | 1e-64   | 100        | 64.49      | <i>Hirsutella minnesotensis</i>  | KJZ76905                          |
| Hypothetical protein                                   | 242  | 2e-5    | 64         | 30.65      | <i>Sodiomyces alkalinus</i>      | XP_028462488                      |
| Cocaine esterase                                       | 600  | 0       | 94         | 60.27      | <i>Sodiomyces alkalinus</i>      | XP_028462489                      |
| Hypothetical protein                                   | 363  | 1e-109  | 100        | 48.44      | <i>Sodiomyces alkalinus</i>      | XP_028462491                      |
| PKS                                                    | 2402 | 0       | 99         | 49.71      | <i>Sodiomyces alkalinus</i>      | XP_028462492                      |
| Drug resistance transporter                            | 485  | 0       | 98         | 53.12      | <i>Stylonectria norvegica</i>    | KAF7555861                        |
| Virulence sensor protein/Heat shock protein 90 (Hsp90) | 1660 | 0       | 83         | 67.05      | <i>Sodiomyces alkalinus</i>      | XP_028465417                      |
| PXMP 2/4 family protein                                | 255  | 4e-97   | 100        | 57.25      | <i>Colletotrichum musicola</i>   | KAF6806760                        |

|                             |      |   |    |       |                                  |              |
|-----------------------------|------|---|----|-------|----------------------------------|--------------|
| Transport protein           | 327  | 0 | 99 | 85.54 | <i>Colletotrichum simmondsii</i> | KXH42740     |
| Signal recognition receptor | 568  | 0 | 98 | 75.79 | <i>Sodiomyces alkalinus</i>      | XP_028465413 |
| Myosin class II             | 2591 | 0 | 82 | 61.33 | <i>Sodiomyces alkalinus</i>      | XP_028465411 |

### 3) *Verticillium dahliae* contig NW\_009276935, VRPKS-I-26 cluster

| Gene name                          | Size | E value | % Coverage | % identity | Top blast hit                       | Accession number of top blast hit |
|------------------------------------|------|---------|------------|------------|-------------------------------------|-----------------------------------|
| Short chain dehydrogenase          | 292  | 4e-122  | 99         | 58.42      | <i>Colletotrichum siamense</i>      | XP_036493403                      |
| Transcriptional regulatory protein | 399  | 8e-79   | 89         | 40.22      | <i>Colletotrichum orchidophilum</i> | XP_022471000                      |
| Ankyrin repeat protein             | 778  | 1e-61   | 81         | 28.59      | <i>Colletotrichum truncatum</i>     | XP_036575058                      |
| Putative thiol methyltransferase   | 77   | 2e-48   | 100        | 100        | <i>Verticillium dahliae</i>         | KAF3349318                        |
| Hypothetical protein               | 1017 | 0       | 99         | 54.45      | <i>Microbacterium sp</i>            | WP_144806847                      |
| Hypothetical protein               | 577  | 0       | 100        | 86.70      | <i>Colletotrichum higginsianum</i>  | XP_018157666                      |
| Integral membrane protein          | 365  | 7e-177  | 98         | 68.89      | <i>Colletotrichum incanum</i>       | KZL85847                          |
| Dehydrogenase/oxidoreductase       | 616  | 0       | 93         | 78.86      | <i>Colletotrichum sublineola</i>    | KDN72067                          |
| Hypothetical protein               | 1269 | 0       | 78         | 70.13      | <i>Colletotrichum fioriniae</i>     | EXF76932                          |
| Hypothetical protein               | 162  | 6e-59   | 97         | 57.86      | <i>Colletotrichum viniferum</i>     | KAF4921290                        |
| PKS                                | 1427 | 0       | 98         | 62.71      | <i>Monosporascus sp</i>             | RYP50633                          |
| Tubulin tyrosine ligase protein    | 472  | 0       | 99         | 70.10      | <i>Coniochaeta sp.</i>              | KAB5518934                        |
| Short chain dehydrogenase          | 312  | 6e-166  | 98         | 71.75      | <i>Stachybotrys chlor</i>           | KFA66828                          |
| Leucine amidopeptidase             | 373  | 0       | 100        | 72.65      | <i>Cylindrodendrum hubeiense</i>    | KAF7555029                        |
| Midasin                            | 324  | 1e-24   | 83         | 38.74      | <i>Colletotrichum siamense</i>      | KAF4871344                        |
| Hypothetical protein               | 200  | 1e-90   | 99         | 56.36      | <i>Sodiomyces alkalinus</i>         | XP_028470403                      |
| Hypothetical protein               | 126  | 8e-22   | 56         | 69.01      | <i>Hypoxylon sp</i>                 | OTA94229                          |
| Hypothetical protein               | 452  | 2e-93   | 92         | 45.92      | <i>Colletotrichum chlorophyti</i>   | OLN97947                          |
| LEA domain containing protein      | 1146 | 0       | 97         | 43         | <i>Colletotrichum orchidophilum</i> | XP_022467882                      |

### 4) *Verticillium dahliae* contig NW\_009276940, PKS-III cluster

| Gene name                            | Size | E value | % Coverage | % identity | Top blast hit                      | Accession number of top blast hit |
|--------------------------------------|------|---------|------------|------------|------------------------------------|-----------------------------------|
| Carbonic anhydrase                   | 271  | 1e-141  | 98         | 70.41      | <i>Colletotrichum simmondsii</i>   | KXH49803                          |
| Acetyltransferase                    | 279  | 7e-146  | 86         | 79.75      | <i>Colletotrichum higginsianum</i> | XP_018159255                      |
| Oxidoreductase                       | 451  | 0       | 98         | 60.14      | <i>Colletotrichum higginsianum</i> | XP_018159254                      |
| Feruloyl esterase                    | 294  | 1e-146  | 96         | 96.23      | <i>Colletotrichum orbiculare</i>   | TDZ25527                          |
| Fungal specific transcription factor | 608  | 0       | 99         | 72.88      | <i>Colletotrichum incanum</i>      | KZL80546                          |
| BFR2 protein                         | 598  | 0       | 100        | 62.42      | <i>Colletotrichum plurivorum</i>   | KAF6823613                        |
| PKS-III                              | 440  | 0       | 100        | 72.01      | <i>Colletotrichum chlorophyti</i>  | OLN95986                          |
| Fructose biphosphate aldolase        | 199  | 4e-85   | 100        | 93.84      | <i>Sodiomyces alkalinus</i>        | XP_028470318                      |
| Specific exonuclease                 | 1531 | 0       | 66         | 73.98      | <i>Sodiomyces alkalinus</i>        | XP_028470311                      |
| Mitochondrial 2 oxoglutarate carrier | 335  | 0       | 100        | 85.97      | <i>Colletotrichum chlorophyti</i>  | OLN95994                          |
| Hypothetical protein                 | 651  | 3e-168  | 98         | 53.53      | <i>Colletotrichum truncatum</i>    | XP_036586171                      |
| Splicing factor spf30                | 320  | 2e-148  | 100        | 72.81      | <i>Colletotrichum truncatum</i>    | XP_036586172                      |
| Iron sulfur protein                  | 82   | 4e-29   | 95         | 75.64      | <i>Colletotrichum plurivorum</i>   | KAF6823606                        |
| Cell division control protein        | 191  | 4e-95   | 98         | 70.37      | <i>Sodiomyces alkalinus</i>        | XP_028470317                      |

|                                |     |       |    |       |                             |              |
|--------------------------------|-----|-------|----|-------|-----------------------------|--------------|
| Short chain dehydrogenase      | 69  | 3e-23 | 76 | 84.91 | <i>Sodiomyces alkalinus</i> | XP_028470310 |
| Cellular morphogenesis protein | 256 | 3e-51 | 97 | 46.15 | <i>Colletotrichum sojae</i> | KAF6809931   |

**5) *Verticillium dahliae* contig NW\_009276948, VRPKS-I-19 cluster**

| Gene name                                    | Size | E value | % Coverage | % identity | Top blast hit                         | Accession number of top blast hit |
|----------------------------------------------|------|---------|------------|------------|---------------------------------------|-----------------------------------|
| Extracellular serine rich protein            | 216  | 7e-85   | 86         | 69.84      | <i>Colletotrichum higginsianum</i>    | XP_018161331                      |
| Hypothetical protein                         | 77   | 1e-21   | 97         | 55.13      | <i>Sodiomyces alkalinus</i>           | XP_028465568                      |
| Hypothetical protein                         | 290  | 7e-70   | 95         | 44.24      | <i>Acremonium chrysogenum</i>         | KFH42767                          |
| NADH ubiquinone oxidoreductase               | 209  | 2e-58   | 84         | 55.21      | <i>Thermothielavioides terrestris</i> | SPQ17832                          |
| Mitochondrial inner membrane translocase     | 542  | 0       | 100        | 74.91      | <i>Sodiomyces alkalinu</i>            | XP_028468965                      |
| Ribosomal protein                            | 248  | 2e-98   | 100        | 58.47      | <i>Colletotrichum fioriniae</i>       | EXF75199.                         |
| DeSI like protein sdu 1                      | 257  | 2e-136  | 97         | 76         | <i>Colletotrichum chlorophyti</i>     | OLN97068                          |
| Obg like ATPase                              | 394  | 0       | 100        | 88.83      | <i>Claviceps africana</i>             | KAG5929667                        |
| Exopolygalacturonase/Thioredoxin domain      | 509  | 1e-180  | 76         | 57.01      | <i>Monosporascus sp</i>               | RYP54678                          |
| Ammonium transporter/drug resistance protein | 576  | 0       | 98         | 69.80      | <i>Sodiomyces alkalinus</i>           | XP_028468956                      |
| R-PKS-I                                      | 2160 | 0       | 99         | 61.92      | <i>Claviceps purpurea</i>             | KAG6168136                        |
| Esterase                                     | 274  | 1e-89   | 97         | 47.84      | <i>Claviceps citrina</i>              | KAG6041354                        |
| L-theronate dehydrogenase                    | 1134 | 0       | 99         | 72.90      | <i>Colletotrichum graminicola</i>     | XP_008095607                      |
| Fungal specific transcription factor         | 633  | 0       | 100        | 61.80      | <i>Colletotrichum salicis</i>         | KXH47283                          |
| MFS transporter                              | 488  | 0       | 99         | 76.18      | <i>Colletotrichum chlorophyti</i>     | OLN87319                          |
| Hypothetical protein                         | 205  | 9e-132  | 94         | 96.89      | <i>Verticillium longisporum</i>       | KAG7105862                        |
| Alpha/beta hydrolase                         | 196  | 6e-54   | 96         | 44.58      | <i>Zopfia rhizophila</i>              | KAF2180147                        |
| Cutinase                                     | 224  | 9e-116  | 91         | 80.39      | <i>Sodiomyces alkalinus</i>           | XP_028468955                      |
| Vacuolar protein sorting associate protein 9 | 770  | 0       | 98         | 69.64      | <i>Colletotrichum orbiculare</i>      | TDZ20835                          |
| Hypothetical protein                         | 482  | 3e-34   | 65         | 45.02      | <i>Colletotrichum tofieldiae</i>      | KZL68686                          |
| Acetylxyylan esterase 2 like protein         | 284  | 3e-93   | 89         | 58.36      | <i>Colletotrichum siamense</i>        | KAF4811263                        |
| Ankyrin repeat protein                       | 381  | 4e-16   | 24         | 47.37      | <i>Colletotrichum tofieldiae</i>      | KZL70525                          |

**6) *Verticillium dahliae* contig NW\_009276923, VRPKS-I-1 cluster**

| Gene name                                                          | Size | E value | % Coverage | % identity | Top blast hit                          | Accession number of top blast hit |
|--------------------------------------------------------------------|------|---------|------------|------------|----------------------------------------|-----------------------------------|
| AP-3 complex subunit beta-2 like protein                           | 659  | 0       | 92         | 78.49      | <i>Colletotrichum truncatum</i>        | XP_036580440                      |
| Hypothetical protein                                               | 135  | 8e-35   | 98         | 46.41      | <i>Sodiomyces alkalinus</i>            | XP_028470755                      |
| Kinetochoe protein nuf2                                            | 331  | 8e-178  | 90         | 79.05      | <i>Sodiomyces alkalinus</i>            | XP_028470756                      |
| Hypothetical protein                                               | 328  | 4e-32   | 77         | 34.53      | <i>Fusarium gramineum</i>              | KAF5000361                        |
| Hypothetical protein                                               | 195  | 1e-58   | 97         | 52.63      | <i>Fusarium oxysporum f. sp. rapae</i> | KAG7415270                        |
| Efflux pump/MFS-type efflux transporter                            | 585  | 0       | 91         | 68.96      | <i>Torrubiella hemipte</i>             | CEJ81615                          |
| Transcription factor (Isoflavipucine cluster transcription factor) | 413  | 2e-56   | 50         | 44.05      | <i>Torrubiella hemipterig</i>          | CEJ81614                          |
| Hypothetical protein                                               | 195  | 2e-42   | 96         | 38.62      | <i>Lasiodiplodia theobromae</i>        | KAB2573329                        |
| Enoyl reductase                                                    | 317  | 1e-79   | 96         | 41.64      | <i>Aspergillus turcosus</i>            | RHZ60657                          |

|                          |      |       |     |       |                                  |            |
|--------------------------|------|-------|-----|-------|----------------------------------|------------|
| Hydrolase/aminopeptidase | 359  | 7e-98 | 96  | 49.71 | <i>Tothia fuscella</i>           | KAF2431630 |
| Hypothetical protein     | 371  | 4e-94 | 99  | 42.20 | <i>Phialocephala subalpina</i>   | CZR58350   |
| PKS-NRPS                 | 4123 | 0     | 99  | 44.83 | <i>Massariosphaeria phaeosp</i>  | KAF2874833 |
| Hypothetical protein     | 286  | 3e-71 | 78  | 50    | <i>Diaporthe helianthi</i>       | POS73388   |
| Hypothetical protein     | 154  | 3e-73 | 97  | 69.33 | <i>Penicillium brasilianum</i>   | CEJ59049   |
| Oxidoreductase           | 332  | 0     | 100 | 75    | <i>Stachybotrys chartarum</i>    | KFA54517   |
| Hypothetical protein     | 717  | 0     | 95  | 52.47 | <i>Colletotrichum simmondsii</i> | KXH52233   |

**7) *Verticillium dahliae* contig NW\_009276921, VNRPKS-I-1 cluster**

| Gene name                                 | Size | E value | % Coverage | % identity | Top blast hit                      | Accession number of top blast hit |
|-------------------------------------------|------|---------|------------|------------|------------------------------------|-----------------------------------|
| U3 small nucleolar ribonucleoprotein IMP3 | 183  | 7e-117  | 100        | 88.52      | <i>Sodiomyces alkalinus</i>        | XP_028469265                      |
| 37S ribosomal protein                     | 207  | 1e-95   | 96         | 69.85      | <i>Sodiomyces alkalinus</i>        | XP_028469266                      |
| Complex I intermediate associate protein  | 693  | 0       | 99         | 72.05      | <i>Sodiomyces alkalinus</i>        | XP_028469267                      |
| Short chain dehydrogenase                 | 284  | 1e-157  | 100        | 79.23      | <i>Colletotrichum fioriniae</i>    | EXF81015                          |
| Hypothetical protein                      | 286  | 6e-53   | 57         | 52.73      | <i>Sodiomyces alkalinus</i>        | XP_028469272                      |
| L 2,4 diaminobutyrate decarboxylase       | 479  | 0       | 96         | 58.67      | <i>Colletotrichum sidae</i>        | TEA12782                          |
| DUF 92 domain containing protein          | 390  | 4e-168  | 99         | 64.86      | <i>Sodiomyces alkalinus</i>        | XP_028469270                      |
| Hypothetical protein                      | 223  | 4e-77   | 49         | 100        | <i>Verticillium longisporum</i>    | KAG7142964                        |
| Multicopper oxidase                       | 586  | 0       | 91         | 65.99      | <i>Colletotrichum tofieldiae</i>   | KZL72261                          |
| NR-PKS-I                                  | 2189 | 0       | 100        | 76.45      | <i>Colletotrichum karsti</i>       | XP_038751444                      |
| Oxidoreductase/Hypothetical protein       | 220  | 1e-117  | 91         | 72.73      | <i>Colletotrichum truncatum</i>    | XP_036586400                      |
| Hypothetical protein                      | 246  | 1e-53   | 51         | 70.63      | <i>Colletotrichum higginsianum</i> | CCF47183                          |
| Transcription factor                      | 578  | 6e-176  | 97         | 70.54      | <i>Colletotrichum truncatum</i>    | XP_036589502                      |
| Glycosyl transferase                      | 187  | 2e-82   | 100        | 61.65      | <i>Sodiomyces alkalinus</i>        | XP_028469283                      |
| Dihydrodipicolinate synthetase family     | 331  | 9e-178  | 97         | 73.68      | <i>Daldinia sp.</i>                | OTB10674                          |
| Autophagy related protein 2               | 1786 | 0       | 98         | 67.90      | <i>Sodiomyces alkalinus</i>        | XP_028469284                      |

**8) *Verticillium dahliae* contig NW\_009276930, VRPKS-I-8 cluster**

| Gene name                                                                                          | Size | E value | % Coverage | % identity | Top blast hit                  | Accession number of top blast hit |
|----------------------------------------------------------------------------------------------------|------|---------|------------|------------|--------------------------------|-----------------------------------|
| PKS                                                                                                | 2574 | 0       | 95         | 77.88      | <i>Stemphylium lycopersici</i> | RAR12984                          |
| Enoyl reductase                                                                                    | 330  | 2e-164  | 99         | 64.15      | <i>Fusarium mexicanum</i>      | RAR12984                          |
| Hydrolase                                                                                          | 288  | 0       | 100        | 85.12      | <i>Stemphylium lycopersici</i> | KNG48003                          |
| Fungal ZN(2) Cys(6) cluster domain containing protein/Fujikurins biosynthesis transcription factor | 366  | 1e-126  | 99         | 57.53      | <i>Stemphylium lycopersici</i> | KNG48004                          |
| MFS gliotoxin efflux transporter                                                                   | 470  | 0       | 99         | 69.57      | <i>Ascochyta lentis</i>        | KAF9701447                        |
| Cytochrome monooxygenase                                                                           | 513  | 0       | 93         | 73.65      | <i>Fusarium sp.</i>            | KAF5026356                        |
| Hypothetical protein                                                                               | 237  | 8e-47   | 62         | 54.38      | <i>Cadophora malorum</i>       | KAG4414469                        |
| Hypothetical protein                                                                               | 93   | 2e-24   | 98         | 54.37      | <i>Stylonectria norvegica</i>  | KAF7562826                        |
| Hypothetical protein                                                                               | 244  | 1e-38   | 100        | 39.38      | <i>Stachybotrys chartarum</i>  | KEY69576                          |
| Dehydrogenase                                                                                      | 823  | 1e-138  | 84         | 46.63      | <i>Ustilagoidea virens</i>     | QUC21319                          |
| Hypothetical protein                                                                               | 1331 | 0       | 99         | 44.89      | <i>Fusarium mundagurra</i>     | KAF5705177                        |

**9) *Verticillium dahliae* contig NW\_009276967, VRPKS-I-17 cluster**

| Gene name                                                     | Size | E value | % Coverage | % identity | Top blast hit                  | Accession number of top blast hit |
|---------------------------------------------------------------|------|---------|------------|------------|--------------------------------|-----------------------------------|
| Golgi to ER traffic protein                                   | 333  | 2e-180  | 100        | 78.44      | Colletotrichum gloeosporioides | KAF3811196                        |
| putative 6-phosphofructo-2-kinase/fructose-2 like protein     | 572  | 0       | 93         | 88.60      | Colletotrichum karsti          | XP_038750648                      |
| Hydrolase                                                     | 823  | 0       | 100        | 62.98      | Colletotrichum scovillei       | XP_035333467                      |
| 54S ribosomal protein                                         | 352  | 0       | 99         | 73.14      | Sodiomyces alkalinus           | XP_028466988                      |
| Hsp 70 nucleotide exchange factor                             | 209  | 3e-98   | 97         | 71.57      | Sodiomyces alkalinus           | XP_028466987                      |
| Actin                                                         | 251  | 1e-175  | 94         | 99.16      | Acinetobacter baumannii        | WP_147504702                      |
| ABC transporter                                               | 1302 | 0       | 97         | 67.79      | Colletotrichum chlorophyti     | OLN85600                          |
| Esterase/Hypothetical protein                                 | 255  | 9e-151  | 100        | 78.52      | Colletotrichum sojae           | KAF6806434                        |
| PKS                                                           | 2290 | 0       | 99         | 70.46      | Colletotrichum chlorophyti     | OLN86478                          |
| Serine palmitoyltransferase like protein/Hypothetical protein | 114  | 3e-44   | 78         | 76.67      | Sodiomyces alkalinus           | XP_028466984                      |
| Elongator complex protein                                     | 824  | 0       | 99         | 66.79      | Colletotrichum tofieldiae      | KZL71342                          |
| Ubiquitin modifier                                            | 104  | 1e-56   | 99         | 79.61      | Claviceps pusilla              | KAG6012378                        |
| Zinc finger protein (transcription factor)                    | 249  | 2e-94   | 89         | 60.26      | Colletotrichum musicola        | KAF6845115                        |
| Asparagine zinc finger protein                                | 159  | 4e-07   | 71         | 33.63      | Colletotrichum incanum         | OHW91750                          |
| Mitochondrial FAD carrier protein                             | 196  | 6e-88   | 94         | 71.36      | Colletotrichum sidae           | TEA17977                          |

**10) *Verticillium dahliae* contig NW\_009276941, VRPKS-I-11 cluster**

| Gene name                                                        | Size | E value | % Coverage | % identity | Top blast hit                            | Accession number of top blast hit |
|------------------------------------------------------------------|------|---------|------------|------------|------------------------------------------|-----------------------------------|
| Putative lyase                                                   | 231  | 4e-140  | 100        | 82.25      | <i>Cylindrodendrum hubeiense</i>         | KAF7550322                        |
| Dibenzothiophene desulfurization enzyme C like protein           | 428  | 0       | 100        | 79.69      | <i>Neonectria ditissima</i>              | KPM44574                          |
| Acetate transporter                                              | 202  | 1e-101  | 99         | 77.50      | <i>Aspergillus sclerotiiicarbonarius</i> | PYI02021                          |
| FAD binding domain protein                                       | 506  | 0       | 99         | 68.25      | <i>Sodiomyces alkalinus</i>              | XP_028469411                      |
| Hydrolase                                                        | 383  | 3e-168  | 99         | 58.40      | <i>Sodiomyces alkalinus</i>              | XP_028463045                      |
| Phenol-2 monooxygenase                                           | 729  | 0       | 99         | 68.12      | <i>Sodiomyces alkalinus</i>              | XP_028463046                      |
| Methyltransferase                                                | 514  | 0       | 100        | 69.42      | <i>Sodiomyces alkalinus</i>              | XP_028463047                      |
| Myb related protein B                                            | 207  | 4e-08   | 15         | 75.76      | <i>Sodiomyces alkalinus</i>              | XP_028463048                      |
| Serine 3 dehydrogenase                                           | 283  | 9e-155  | 98         | 73.93      | <i>Akanthomyces lecanii</i>              | OAA81050                          |
| Non-canonical non-ribosomal peptide synthetase ascB like protein | 693  | 0       | 100        | 57.55      | <i>Sodiomyces alkalinus</i>              | XP_028463042                      |
| PKS-NRPS                                                         | 2158 | 0       | 76         | 45.29      | <i>Sodiomyces alkalinus</i>              | XP_028463040                      |
| Pectate lyase                                                    | 243  | 4e-141  | 100        | 80.74      | <i>Monosporascus ibericus</i>            | RYP08594                          |
| Hypothetical protein                                             | 403  | 2e-95   | 98         | 41.44      | <i>Sodiomyces alkalinus</i>              | XP_028465602                      |
| DNA damage binding protein                                       | 565  | 0       | 100        | 71.25      | <i>Sodiomyces alkalinus</i>              | XP_028465605                      |
| Sterol 3-beta glucosyltransferase                                | 1460 | 0       | 99         | 69.78      | <i>Colletotrichum aengim</i>             | XP_037179391                      |



|                      |     |        |    |       |                              |          |
|----------------------|-----|--------|----|-------|------------------------------|----------|
| Hypothetical protein | 280 | 7e-136 | 95 | 72.39 | <i>Sporothrix insectorum</i> | OAA62000 |
|----------------------|-----|--------|----|-------|------------------------------|----------|

#### 11) *Verticillium albo-atrum* contig NMXJ01000004, VRPKS-I-16 cluster

| Gene name                                     | Size | E value | % Coverage | % identity | Top blast hit                               | Accession number of top blast hit |
|-----------------------------------------------|------|---------|------------|------------|---------------------------------------------|-----------------------------------|
| Hypothetical protein                          | 528  | 0       | 94         | 72.75      | <i>Fusarium decemcellulare</i>              | KAF4998379                        |
| Integral membrane protein                     | 384  | 0       | 99         | 71.69      | <i>Neonectria ditissima</i>                 | KPM38699                          |
| Amino transferase                             | 380  | 0       | 97         | 78.92      | <i>Colletotrichum karsti</i>                | XP_038747040                      |
| Dihydrodipicolinate synthase family           | 310  | 5e-145  | 100        | 64.63      | <i>Pseudogymnoascus</i> sp                  | KFZ23593                          |
| Hypothetical protein                          | 149  | 1e-21   | 96         | 42.68      | <i>Diaporthe batatas</i>                    | KAG8160464.                       |
| Hypothetical protein                          | 131  | 1e-32   | 83         | 50.43      | <i>Fusarium gaditjirri</i>                  | KAF4952502                        |
| Glycosyl hydrolase/glycosidase                | 664  | 0       | 99         | 77.98      | <i>Colletotrichum trifolii</i>              | TDZ54568                          |
| Hypothetical/BTB domain containing protein    | 289  |         | 100        | 56.12      | <i>Pyricularia pennisetigena</i>            | XP_029745318                      |
| Hypothetical protein                          | 426  | 0       | 98         | 63.92      | <i>Stachybotrys chlorohalonata</i>          | KFA60422                          |
| PAP2 superfamily protein                      | 384  | 2e-159  | 99         | 58.49      | <i>Colletotrichum truncatum</i>             | XP_036575451                      |
| Hypothetical protein                          | 170  | 3e-06   | 87         | 31.06      | <i>Colletotrichum sidae</i>                 | TEA18685                          |
| PKS                                           | 2718 | 0       | 91         | 46.58      | <i>Hyaloscypha variabilis</i>               | PMD43053                          |
| Integral membrane protein/glycosyltransferase | 257  | 8e-71   | 93         | 46.74      | <i>Colletotrichum musicola</i>              | KAF6837090                        |
| Methyl transferase                            | 447  | 0       | 99         | 66.59      | <i>Coccidioides posadasii</i> str. Silveira | EFW14833                          |
| MFS super family                              | 600  | 0       | 95         | 79.23      | <i>Fusarium decemcellulare</i>              | KAF5012339                        |
| Hypothetical protein                          | 449  | 1e-171  | 94         | 57.38      | <i>Pyricularia oryzae</i>                   | XP_003719045                      |
| Thiol specific monooxygenase                  | 507  | 0       | 92         | 75.16      | <i>Diaporthe ampelina</i>                   | KKY36389                          |
| lycogen debranching enzyme                    | 660  | 0       | 99         | 68.95      | <i>Monosporascus ibericus</i>               | RYP03266                          |

#### 12) *Verticillium albo-atrum* contig NMXJ01000009, VRPKS-I-2 cluster

| Gene name                 | Size | E value | % Coverage | % identity | Top blast hit                        | Accession number of top blast hit |
|---------------------------|------|---------|------------|------------|--------------------------------------|-----------------------------------|
| Oxidoreductase            | 680  | 0       | 67         | 68.26      | <i>Colletotrichum truncatum</i>      | XP_036581492                      |
| Sterol uptake protein     | 254  | 8e-76   | 98         | 43.70      | <i>Colletotrichum karsti</i>         | XP_038743400                      |
| 3-ketoacyl Co-A reductase | 322  | 8e-123  | 98         | 55.62      | <i>Tolypocladium ophioglossoides</i> | KND89420                          |
| Hypothetical protein      | 193  | 2e-121  | 100        | 86.01      | <i>Colletotrichum fructicola</i>     | XP_031875990                      |
| Efflux pump/MFS protein   | 588  | 0       | 99         | 85.52      | <i>Colletotrichum fructicola</i>     | KAF4886521                        |
| Hypothetical protein      | 167  | 2e-113  | 100        | 95.21      | <i>Colletotrichum fructicola</i>     | XP_031875989                      |
| Alpha-beta hydrolase      | 433  | 0       | 98         | 86.89      | <i>Colletotrichum fructicola</i>     | XP_031875995.                     |
| PKS-NRPS                  | 3800 | 0       | 100        | 86.09      | <i>Colletotrichum fructicola</i>     | KAF4886526                        |
| Hypothetical protein      | 435  | 0       | 100        | 86.90      | <i>Colletotrichum fructicola</i>     | XP_031875984                      |
| Alcohol dehydrogenase     | 353  | 0       | 100        | 91.78      | <i>Colletotrichum fructicola</i>     | XP_031875992                      |
| Acetyltransferase         | 215  | 6e-70   | 100        | 52.21      | <i>Sodiomyces alkalinus</i>          | XP_028470801                      |
| Alcohol dehydrogenase     | 346  | 3e-178  | 98         | 69.59      | <i>Fusarium oxysporum</i>            | SCO92394                          |
| MFS (Maltose permease)    | 534  | 0       | 99         | 81.77      | <i>Cylindrodendrum hubeiense</i>     | KAF7556152                        |

|                             |      |        |    |       |                                |              |
|-----------------------------|------|--------|----|-------|--------------------------------|--------------|
| Hypothetical protein        | 476  | 0      | 98 | 76.02 | <i>Neonectria ditissima</i>    | KPM41868     |
| Hypothetical protein        | 301  | 7e-118 | 99 | 55.81 | <i>Fusarium ambrosium</i>      | RSM03635     |
| ABC multidrug transporter   | 1469 | 0      | 99 | 69.05 | <i>Neonectria ditissima</i>    | KPM39725     |
| Fungal transcription factor | 1800 | 0      | 36 | 47.71 | <i>Blastomyces gilchristii</i> | XP_031581329 |

### 13) *Verticillium albo-atrum* contig NMXJ01000001, VRPKS-I-12 cluster

| Gene name                                 | Size | E value | % Coverage | % identity | Top blast hit                         | Accession number of top blast hit |
|-------------------------------------------|------|---------|------------|------------|---------------------------------------|-----------------------------------|
| Complex I intermediate associated protein | 804  | 0       | 100        | 72.90      | <i>Sodiomyces alkalinus</i>           | XP_028469267                      |
| Dehydrogenase                             | 283  | 6e-166  | 100        | 84.10      | <i>Colletotrichum fioriniae</i>       | EXF81015                          |
| Cytochrome P-450                          | 476  | 0       | 97         | 73.93      | <i>Sodiomyces alkalinus</i>           | XP_028469280                      |
| Hydrolase                                 | 396  | 6e-100  | 92         | 45.12      | <i>Colletotrichum salicis</i>         | KXH61195                          |
| Asparatic protease                        | 436  | 5e-180  | 95         | 56.49      | <i>Colletotrichum orchidophilum</i>   | XP_022470055                      |
| FAD binding monooxygenase                 | 426  | 0       | 99         | 70.45      | <i>Colletotrichum scovillei</i>       | KAG7054835                        |
| Hypothetical protein/Protein kinase       | 887  | 0       | 99         | 62.77      | <i>Sodiomyces alkalinus</i>           | XP_028469275                      |
| PKS                                       | 3888 | 0       | 99         | 74.31      | <i>Sodiomyces alkalinus</i>           | XP_028469272                      |
| L 2,4 diaminobutyrate decarboxylase       | 515  | 0       | 93         | 66.53      | <i>Colletotrichum graminicola</i>     | XP_008093084                      |
| DUF 92 domain containing protein          | 387  | 2e-163  | 99         | 62.79      | <i>Sodiomyces alkalinus</i>           | XP_028469270                      |
| Hypothetical protein                      | 320  | 3e-22   | 33         | 44.86      | <i>Verticillium longisporum</i>       | KAG7142964                        |
| Multicopper oxidase                       | 561  | 0       | 96         | 67.77      | <i>Colletotrichum tofieldiae</i>      | KZL72261                          |
| NR-PKS-I                                  | 2188 | 0       | 99         | 79.22      | <i>Colletotrichum gloeosporioides</i> | EQB55056                          |
| Oxidoreductase                            | 325  | 0       | 99         | 85.80      | <i>Colletotrichum truncatum</i>       | XP_036586400                      |
| Transcription factor/Hypothetical protein | 424  | 1e-156  | 100        | 56.78      | <i>Colletotrichum nymphaeae</i>       | KXH55671                          |
| Transcription factor Cmr1                 | 834  | 0       | 99         | 70.82      | <i>Colletotrichum truncatum</i>       | XP_036589502                      |

### 14) *Verticillium albo-atrum* contig NMXJ01000001, VRPKS-I-9 cluster

| Gene name                                  | Size | E value | % Coverage | % identity | Top blast hit                     | Accession number of top blast hit |
|--------------------------------------------|------|---------|------------|------------|-----------------------------------|-----------------------------------|
| Hypothetical protein                       | 1129 | 0       | 95         | 59.65      | <i>Sodiomyces alkalinus</i>       | XP_028464300                      |
| Galactose transporter                      | 532  | 0       | 90         | 76.53      | <i>Sodiomyces alkalinus</i>       | XP_028464187                      |
| Hypothetical protein                       | 207  | 8e-19   | 62         | 45.04      | <i>Colletotrichum sidae</i>       | TEA17102                          |
| Phosphopantothienoylcysteine decarboxylase | 610  | 0       | 99         | 79.17      | <i>Sodiomyces alkalinus</i>       | XP_028464284                      |
| Hypothetical protein                       | 400  | 8e-31   | 66         | 39.23      | <i>Geosmithia morbida</i>         | XP_035320824                      |
| PKS-NRPS                                   | 3644 | 0       | 99         | 49.78      | <i>Monosporascus sp</i>           | RYP45085                          |
| ABC like protein                           | 503  | 0       | 91         | 82.03      | <i>Colletotrichum chlorophyti</i> | OLN84498                          |
| Galactosyl transferase                     | 329  | 4e-153  | 84         | 71.97      | <i>Sodiomyces alkalinus</i>       | XP_028468709                      |
| 40S ribosomal protein                      | 256  | 0       | 100        | 96.88      | <i>Sodiomyces alkalinus</i>       | XP_028468707                      |
| GTP-cyclohydrolase                         | 427  | 0       | 97         | 60.41      | <i>Akanthomyces lecanii</i>       | OAA77453                          |

### 15) *Verticillium albo-atrum* contig NMXJ01000001, VRPKS-I-17 cluster

| Gene name | Size | E value | % Coverage | % identity | Top blast hit | Accession number of top blast hit |
|-----------|------|---------|------------|------------|---------------|-----------------------------------|
|-----------|------|---------|------------|------------|---------------|-----------------------------------|

|                                                                            |      |        |     |        |                                    |              |
|----------------------------------------------------------------------------|------|--------|-----|--------|------------------------------------|--------------|
| Hypothetical protein                                                       | 221  | 1e-41  | 58  | 51.52  | <i>Fusarium albosuccineum</i>      | KAF4462046   |
| Isoflavone reductase                                                       | 302  | 4e-92  | 99  | 48.003 | <i>Colletotrichum higginsianum</i> | XP_018160455 |
| Mitochondrial import receptor                                              | 352  | 0      | 100 | 83.62  | <i>Sodiomyces alkalinus</i>        | XP_028466992 |
| 6-phosphofructo2-kinase                                                    | 570  | 0      | 93  | 86.36  | <i>Colletotrichum karsti</i>       | XP_038750648 |
| Hydrolase/Hypothetical protein                                             | 827  | 0      | 100 | 63.56  | <i>Colletotrichum orbiculare</i>   | TDZ22411     |
| 54S ribosomal protein                                                      | 356  | 0      | 98  | 76.42  | <i>Sodiomyces alkalinus</i>        | XP_028466988 |
| HSP70 nucleotide exchange factor                                           | 209  | 6e-101 | 97  | 72.55  | <i>Sodiomyces alkalinus</i>        | XP_028466987 |
| Actin                                                                      | 375  | 0      | 100 | 100    | <i>Tolypocladium paradoxum</i>     | POR36442     |
| Peptidyl t-RNA hydrolase                                                   | 152  | 8e-55  | 78  | 72.58  | <i>Purpureocillium lilacinum</i>   | XP_018176407 |
| ABC transporter                                                            | 1267 | 0      | 98  | 68.24  | <i>Colletotrichum sojae</i>        | KAF6806433   |
| Esterase                                                                   | 255  | 6e-154 | 100 | 80.86  | <i>Colletotrichum sojae</i>        | KAF6806434   |
| PKS                                                                        | 2277 | 0      | 99  | 71.66  | <i>Colletotrichum truncatum</i>    | XP_036585096 |
| Hypothetical protein/Serine palmitoyltransferase domain containing protein | 113  | 3e-49  | 100 | 71.68  | <i>Sodiomyces alkalinus</i>        | XP_028466984 |
| Elongator protein                                                          | 821  | 0      | 99  | 70.85  | <i>Colletotrichum truncatum</i>    | XP_036582858 |
| Ubiquitin related modifier                                                 | 104  | 1e-155 | 99  | 79.61  | <i>Cordyceps militaris</i>         | XP_006668991 |
| Zinc finger protein                                                        | 445  | 3e-128 | 91  | 48.72  | <i>Colletotrichum incanum</i>      | OHW91750     |
| Mitochondrial FAD carrier protein                                          | 310  | 1e-167 | 99  | 73.68  | <i>Colletotrichum chlorophyti</i>  | OLN84903     |
| Splicing factor                                                            | 373  | 8e-178 | 85  | 81.50  | <i>Colletotrichum camelliae</i>    | KAG2106276   |

**16) *Verticillium albo-atrum* contig NMXJ01000001, VRPKS-I-23 cluster**

| Gene name                                                     | Size | E value | % Coverage | % identity | Top blast hit                   | Accession number of top blast hit |
|---------------------------------------------------------------|------|---------|------------|------------|---------------------------------|-----------------------------------|
| Myosin class II heavy chain protein                           | 2138 | 0       | 100        | 63.13      | <i>Sodiomyces alkalinus</i>     | XP_028465411                      |
| SRP54 domain containing protein                               | 669  | 0       | 99         | 80.89      | <i>Sodiomyces alkalinus</i>     | XP_028465413                      |
| ER to Golgi transporter                                       | 323  | 0       | 99         | 85.98      | <i>Colletotrichum truncatum</i> | XP_036588854                      |
| MPV17/PMP22 family protein                                    | 231  | 8e-102  | 98         | 63.16      | <i>Colletotrichum musicola</i>  | KAF6806760                        |
| Stress responsive A/B barrel domain containing protein        | 199  | 2e-56   | 56         | 72.57      | <i>Sodiomyces alkalinus</i>     | XP_028465416                      |
| HSP90 like protein                                            | 1392 | 0       | 99         | 67         | <i>Sodiomyces alkalinus</i>     | XP_028465417                      |
| Efflux pump/transporter                                       | 588  | 0       | 97         | 51.30      | <i>Fusarium gramineum</i>       | KAF4989526                        |
| R-PKS-I                                                       | 2651 | 0       | 89         | 51.24      | <i>Sodiomyces alkalinus</i>     | XP_028462492                      |
| Tryptophan dimethylallyltransferase domain containing protein | 456  | 0       | 97         | 60.49      | <i>Colletotrichum truncatum</i> | XP_036588933                      |
| Hypothetical protein                                          | 361  | 2e-113  | 100        | 49.48      | <i>Sodiomyces alkalinus</i>     | XP_028462491                      |
| Hypothetical protein                                          | 550  | 8e-143  | 95         | 47.70      | <i>Fusarium sp.</i>             | RSL49290                          |
| Hypothetical protein                                          | 250  | 3e-06   | 62         | 33.33      | <i>Sodiomyces alkalinus</i>     | XP_028462488                      |
| GATA zinc finger domain containing protein                    | 119  | 1e-16   | 36         | 75         | <i>Colletotrichum tanacetii</i> | TKW48536                          |
| Homoserine kinase                                             | 356  | 0       | 99         | 90.45      | <i>Colletotrichum scovillei</i> | XP_035325878                      |
| pfkB family kinase                                            | 367  | 4e-64   | 98         | 38.34      | <i>Sodiomyces alkalinus</i>     | XP_028463289                      |

|                      |     |       |    |       |                             |              |
|----------------------|-----|-------|----|-------|-----------------------------|--------------|
| Hypothetical protein | 194 | 1e-53 | 95 | 55.73 | <i>Sodiomyces alkalinus</i> | XP_028463291 |
|----------------------|-----|-------|----|-------|-----------------------------|--------------|

**17) *Verticillium albo-atrum* contig NMXJ01000003, VRPKS-I-25 cluster**

| Gene name                                           | Size | E value | % Coverage | % identity | Top blast hit                     | Accession number of top blast hit |
|-----------------------------------------------------|------|---------|------------|------------|-----------------------------------|-----------------------------------|
| Hypothetical protein                                | 1064 | 0       | 68         | 51.05      | <i>Colletotrichum incanum</i>     | KZL75670                          |
| Fungal specific transcription factor                | 774  | 0       | 93         | 63.44      | <i>Colletotrichum scovillei</i>   | XP_035329228                      |
| Protein OS-9 like protein                           | 528  | 0       | 99         | 60         | <i>Colletotrichum spinosum</i>    | TDZ38446                          |
| Key lime pathogenicity protein/hypothetical protein | 676  | 1e-179  | 98         |            | <i>Colletotrichum fruticola</i>   | XP_031885775                      |
| S-adenosyl-Lmethionine dependent methyltransferase  | 315  | 6e-170  | 100        | 76.19      | <i>Sodiomyces alkalinus</i>       | XP_028466391                      |
| Dihydroxy acid dehydratase                          | 647  | 0       | 100        | 72.15      | <i>Sodiomyces alkalinus</i>       | XP_028466806                      |
| Zinc binding dehydrogenase/Hypothetical protein     | 294  | 8e-167  | 99         |            | <i>Stachybotrys chartarum</i>     | KEY68920                          |
| PKS                                                 | 2103 | 0       | 88         | 73.91      | <i>Stachybotrys chartarum</i>     | KEY68922                          |
| Hydrolase/xylosidase domain containing protein      | 1089 | 0       | 52         | 85.44      | <i>Colletotrichum truncatum</i>   | XP_036575294                      |
| Monooxygenase                                       | 487  | 0       | 98         | 70.39      | <i>Colletotrichum asianum</i>     | KAF0322960                        |
| STB-5 protein                                       | 751  | 0       | 99         | 58.41      | <i>Colletotrichum chlorophyti</i> | OLN81943                          |
| Sodium transport ATPase                             | 1071 | 0       | 98         | 74.95      | <i>Monosporascus sp.</i>          | RYP34097                          |
| Bifunctional polynucleotide phosphatase/kinase      | 456  | 0       | 99         | 70.28      | <i>Sodiomyces alkalinus</i>       | XP_028468241                      |
| RNA polymerase II mediator complex subunit          | 269  | 2e-161  | 98         | 78.57      | <i>Sodiomyces alkalinus</i>       | XP_028468239                      |
| Hypothetical protein                                | 426  | 1e-97   | 97         | 41.40      | <i>Cylindrodendrum hubeiense</i>  | KAF7557101                        |
| Hypothetical protein                                | 568  | 0       | 100        | 57.22      | <i>Colletotrichum fioriniae</i>   | EXF84616                          |

\*No significant similarity found

**18) *Verticillium albo-atrum* contig NMXJ01000003, VRPKS-I-24 cluster**

| Gene name                             | Size | E value | % Coverage | % identity | Top blast hit                         | Accession number of top blast hit |
|---------------------------------------|------|---------|------------|------------|---------------------------------------|-----------------------------------|
| Ubiquitin carboxyl-terminal hydrolase | 247  | 2e-146  | 99         | 83.33      | <i>Sodiomyces alkalinus</i>           | XP_028469647                      |
| RNA helicase                          | 726  | 0       | 96         | 72.07      | <i>Sodiomyces alkalinus</i>           | XP_028469646                      |
| Synaptobrevin                         | 237  | 9e-147  | 100        | 90.72      | <i>Sodiomyces alkalinus</i>           | XP_028469645                      |
| Hypothetical protein                  | 193  | 1e-37   | 85         | 45.71      | <i>Fusarium oxysporum f. sp. pisi</i> | EXA28620                          |
| Hypothetical protein                  | 108  | 4e-11   | 69         | 46.25      | <i>Trichoderma gamsii</i>             | XP_024405574                      |
| Dehydrogenase                         | 430  | 0       | 93         | 73.02      | <i>Colletotrichum plurivorum</i>      | KAF6833458                        |
| Hypothetical protein                  | 241  | 5e-103  | 95         | 64.96      | <i>Sodiomyces alkalinus</i>           | XP_028469642                      |
| Sec1 family protein                   | 738  | 0       | 99         | 67.52      | <i>Sodiomyces alkalinus</i>           | XP_028469641                      |
| Hypothetical protein                  | 805  | 0       | 92         | 63.83      | <i>Colletotrichum karsti</i>          | XP_038751043                      |
| Arylsulfatase                         | 591  | 0       | 93         | 68.09      | <i>Fusarium albosuccineum</i>         | KAF4467271                        |
| Cytochrome P-450                      | 562  | 2e-161  | 99         | 42.14      | <i>Hypoxylon sp.</i>                  | OTA56529                          |

|                                           |      |        |     |       |                                       |              |
|-------------------------------------------|------|--------|-----|-------|---------------------------------------|--------------|
| R-PKS-I                                   | 2453 | 0      | 99  | 63.30 | <i>Cylindrodendrum hubeiense</i>      | KAF7552999   |
| Hypothetical protein                      | 143  | NSS*   | 0   | 0     | NSS*                                  | NSS*         |
| Cutinase like protein                     | 292  | 4e-141 | 90  | 78.87 | <i>Cadophora sp.</i>                  | PVH70228     |
| Major facilitator superfamily transporter | 525  | 0      | 100 | 85.71 | <i>Fusarium oxysporum f. sp.rapae</i> | KAG7404936   |
| Hypothetical protein                      | 1125 | 0      | 99  | 69.64 | <i>Sodiomyces alkalinus</i>           | XP_028469639 |
| Mitosis protein dim1                      | 143  | 2e-95  | 100 | 91.61 | <i>Colletotrichum plurivorum</i>      | KAF6833464   |
| Cell morphogenesis protein                | 2575 | 0      | 99  | 79.85 | <i>Colletotrichum trifolii</i>        | TDZ47227     |

**19) *Verticillium albo-atrum* contig NMXJ01000003, VRPKS-I-19 cluster**

| Gene name                                   | Size | E value | % Coverage | % identity | Top blast hit                      | Accession number of top blast hit |
|---------------------------------------------|------|---------|------------|------------|------------------------------------|-----------------------------------|
| Methyltransferase/Hypothetical protein      | 275  | 6e-105  | 99         | 54.38      | <i>Fusarium gaditjirri</i>         | KAF4945087                        |
| Hypothetical protein                        | 160  | 5e-60   | 95         | 58.55      | <i>Colletotrichum karsti</i>       | XP_038750884                      |
| Hypothetical protein                        | 77   | 2e-21   | 97         | 55.13      | <i>Sodiomyces alkalinus</i>        | XP_028465568                      |
| Hypothetical protein                        | 300  | 2e-82   | 92         | 48.56      | <i>Acremonium chrysogenum</i>      | KFH42767                          |
| N-glycosidase like protein                  | 213  | 2e-55   | 84         | 51.50      | <i>Chaetomium globosum</i>         | XP_001221113                      |
| Mitochondrial inner membrane translocase    | 541  | 0       | 100        | 75.87      | <i>Sodiomyces alkalinus</i>        | XP_028468965                      |
| 37S ribosomal protein                       | 250  | 2e-97   | 100        | 59.36      | <i>Colletotrichum nymphaeae</i>    | KXH60786                          |
| DeSL like protein sdu1                      | 232  | 2e-134  | 99         | 80.09      | <i>Colletotrichum chlorophyti</i>  | OLN97068                          |
| Obg like ATPase                             | 394  | 0       | 100        | 90.10      | <i>Pyricularia grisea</i>          | XP_030984371                      |
| Exopolysaccharuronase                       | 814  | 0       | 55         | 69.44      | <i>Monosporascus sp.</i>           | RYP36431                          |
| Hypothetical protein                        | 519  | 1e-81   | 85         | 38.81      | <i>Neonectria ditissima</i>        | KPM41855                          |
| Thioredoxin domain containing protein       | 162  | 1e-84   | 98         | 76.73      | <i>Hypoxylon sp.</i>               | OTA67286                          |
| Major facilitator superfamily transporter   | 572  | 0       | 98         | 71.45      | <i>Sodiomyces alkalinus</i>        | XP_028468956                      |
| Hypothetical protein                        | 301  | 1e-125  | 100        | 58.61      | <i>Claviceps purpurea</i>          | KAG6238209                        |
| PKS-I                                       | 2108 | 0       | 99         | 63.26      | <i>Epichloe festucae</i>           | QPH02303                          |
| Hypothetical protein                        | 1279 | 0       | 99         | 77.60      | <i>Monosporascus sp.</i>           | RYP73509                          |
| L-threonate dehydrogenase                   | 1135 | 0       | 98         | 74         | <i>Colletotrichum siamense</i>     | KAF4818215                        |
| Fungal specific transcription factor        | 687  | 0       | 100        | 64.74      | <i>Colletotrichum graminicola</i>  | XP_008095606                      |
| Major facilitator superfamily transporter   | 488  | 0       | 98         | 78.38      | <i>Colletotrichum incanum</i>      | OHW90295                          |
| Hydrolase                                   | 349  | 4e-122  | 100        | 51         | <i>Pyrenochaeta sp.</i>            | OAL42911                          |
| Cutinase                                    | 224  | 1e-113  | 90         | 79.80      | <i>Stachybotrys chlorohalonata</i> | KFA64195                          |
| Vacuolar protein sorting associated protein | 757  | 0       | 98         | 71.71      | <i>Colletotrichum sidae</i>        |                                   |

**20) *Verticillium albo-atrum* contig NMXJ01000006, VRPKS-I-5 cluster**

| Gene name                                            | Size | E value | % Coverage | % identity | Top blast hit                 | Accession number of top blast hit |
|------------------------------------------------------|------|---------|------------|------------|-------------------------------|-----------------------------------|
| Phosphatidylinositol N-acetylglucosaminyltransferase | 222  | 2e-80   | 100        | 58.30      | <i>Colletotrichum incanum</i> | KZL82123                          |
| Hypothetical protein                                 | 1615 | 0       | 98         | 71.71      | <i>Sodiomyces alkalinus</i>   | XP_028471323                      |
| Efflux pump/MFS protein                              | 612  | 0       | 93         | 68.47      | <i>Glarea lozoyensis</i>      | XP_008088684                      |
| Hypothetical protein                                 | 181  | 1e-64   | 88         | 58.64      | <i>Botryotinia calthae</i>    | TEY65540                          |

|                           |      |        |     |       |                                   |              |
|---------------------------|------|--------|-----|-------|-----------------------------------|--------------|
| Hypothetical protein      | 490  | 2e-95  | 98  | 41.85 | <i>Botryotinia squamosa</i>       | KAF7857384   |
| PKS-NRPS                  | 4017 | 0      | 100 | 62.50 | <i>Botrytis tulipae</i>           | TGO20046     |
| Hypothetical protein      | 298  | 2e-28  | 47  | 45.14 | <i>Fusarium ambrosium</i>         | RSM05402     |
| Hypothetical protein      | 137  | 2e-77  | 100 | 83.21 | <i>Purpureocillium lilacinum</i>  | XP_018184317 |
| Hypothetical protein      | 157  | 2e-50  | 100 | 62.58 | <i>Colletotrichum graminicola</i> | XP_008094022 |
| Isochorismatase/hydrolase | 244  | 7e-131 | 99  | 77.78 | <i>Colletotrichum truncatum</i>   | XP_036585971 |
| NSS*                      | NSS  | NSS    | NSS | NSS   | NSS                               | NSS          |

\*No significant similarity found

#### 21) *Verticillium albo-atrum* contig NMXJ01000007, VRPKS-I-26 cluster

| Gene name                            | Size | E value | % Coverage | % identity | Top blast hit                         | Accession number of top blast hit |
|--------------------------------------|------|---------|------------|------------|---------------------------------------|-----------------------------------|
| Hypothetical protein                 | 420  | 1e-88   | 84         | 43.70      | <i>Colletotrichum tofieldiae</i>      | KZL73082                          |
| Ankyrin repeat protein               | 810  | 8e-62   | 76         | 28.68      | <i>Colletotrichum truncatum</i>       | XP_036575058                      |
| NSS*                                 | NSS  | NSS     | NSS        | NSS        | NSS                                   | NSS                               |
| Thiol methyltransferase/hypothetical | 78   | 1e-30   | 100        | 70.51      | <i>Verticillium longisporum</i>       | KAG7128937                        |
| Peptidase domain containing protein  | 1015 | 0       | 98         | 55.06      | <i>Microbacterium sp.</i>             | WP_144806847                      |
| Hypothetical protein                 | 578  | 0       | 100        | 88.08      | <i>Colletotrichum higginsianum</i>    | XP_018157666.                     |
| Hypothetical protein                 | 381  | 4e-96   | 85         | 61.20      | <i>Exophiala spinifera</i>            | XP_016240708                      |
| Pectate lyase F                      | 236  | 5e-141  | 97         | 83.98      | <i>Colletotrichum fruticola</i>       | XP_031890093                      |
| Hypothetical protein                 | 1004 | 0       | 100        | 71.14      | <i>Colletotrichum chlorophyti</i>     | OLN96860                          |
| Hypothetical protein                 | 163  | 2e-60   | 100        | 53.99      | <i>Colletotrichum simmondsii</i>      | KXH28221                          |
| Hypothetical protein                 | 148  | 1e-10   | 54         | 45         | <i>Diaporthe batatas</i>              | KAG8165617                        |
| PKS-I                                | 2326 | 0       | 78         | 56.29      | <i>Monosporascus sp.</i>              | RYP50633                          |
| Short chain dehydrogenase            | 330  | 9e-174  | 93         | 72.73      | <i>Stachybotrys chartarum</i>         | KFA49246                          |
| Hypothetical protein                 | 130  | 2e-58   | 100        | 71.54      | <i>Fusarium longipes</i>              | RGP77546                          |
| Leucine aminopeptidase               | 373  | 0       | 100        | 74.26      | <i>Cylindrodendrum hubeiense</i>      | KAF7555029                        |
| Hypothetical protein                 | 497  | 3e-89   | 74         | 54.23      | <i>Colletotrichum gloeosporioides</i> | KAF3801861                        |
| Hypothetical protein/Midasin         | 342  | 3e-18   | 29         | 63.46      | <i>Colletotrichum siamense</i>        | XP_036488857                      |
| Hypothetical protein                 | 200  | 8e-94   | 99         | 59.32      | <i>Sodiomyces alkalinus</i>           | XP_028470403                      |
| Hypothetical protein                 | 126  | 5e-22   | 53         | 70.15      | <i>Hypoxylon sp.</i>                  | OTA94229                          |

\*No significant similarity found

#### 22) *Verticillium albo-atrum* contig NMXJ01000002, VRPKS-I-3 cluster

| Gene name                          | Size | E value | % Coverage | % identity | Top blast hit                       | Accession number of top blast hit |
|------------------------------------|------|---------|------------|------------|-------------------------------------|-----------------------------------|
| T-complex protein 1                | 547  | 0       | 100        | 91.59      | <i>Colletotrichum chlorophyti</i>   | OLN83711                          |
| HMG box protein                    | 394  | 1e-105  | 98         | 54.36      | <i>Colletotrichum orchidophilum</i> | XP_022468387                      |
| Sporulation protein rmd1           | 514  | 0       | 99         | 81.54      | <i>Colletotrichum asianum</i>       | KAF0325559                        |
| Dehydrogenase/hypothetical protein | 135  | 1e-13   | 71         | 38.14      | <i>Pyricularia sp.</i>              | TLD33949                          |
| Saccharopine dehydrogenase         | 414  | 0       | 99         | 65.47      | <i>Sodiomyces alkalinus</i>         | XP_028468308                      |
| 60S ribosomal protein              | 110  | 2e-54   | 78         | 97.67      | <i>Colletotrichum sojae</i>         | KAF6820981                        |
| Hypothetical protein               | 408  | 7e-49   | 79         | 34.65      | <i>Magnaporthiopsis poae</i>        | KLU90970                          |
| PKS-NRPS                           | 4677 | 0       | 86         | 67.40      | <i>Colletotrichum truncatum</i>     | XP_036576988                      |

|                                       |     |        |     |       |                                       |              |
|---------------------------------------|-----|--------|-----|-------|---------------------------------------|--------------|
| Cytochrome P-450 oxidoreductase       | 496 | 0      | 100 | 82.46 | <i>Colletotrichum truncatum</i>       | XP_036576987 |
| Cytochrome P-450                      | 501 | 0      | 99  | 70.57 | <i>Colletotrichum truncatum</i>       | XP_036576986 |
| Trans-enoyl reductase                 | 355 | 0      | 100 | 77.87 | <i>Colletotrichum truncatum</i>       | XP_036576985 |
| Diels alderase                        | 425 | 0      | 100 | 71.76 | <i>Colletotrichum siamense</i>        | KAF4852455   |
| Alpha-beta hydrolase                  | 447 | 0      | 100 | 79.69 | <i>Colletotrichum truncatum</i>       | XP_036576983 |
| Thioredoxin domain containing protein | 245 | 9e-120 | 98  | 68.60 | <i>Colletotrichum sublineola</i>      | KDN69576     |
| C-6 finger domain containing protein  | 619 | 1e-127 | 94  | 40.76 | <i>Colletotrichum higginsianum</i>    | XP_018161555 |
| UPF0045 protein                       | 115 | 1e-61  | 97  |       | <i>Colletotrichum gloeosporioides</i> | KAF3804039   |
| Hypothetical protein                  | 437 | 0      | 100 | 67.73 | <i>Colletotrichum trifolii</i>        | TDZ68279     |
| Serine threonine protein kinase       | 548 | 0      | 99  | 61.40 | <i>Colletotrichum karsti</i>          | XP_038743611 |
| Hypothetical protein                  | 268 | 2e-101 | 100 | 65.93 | <i>Colletotrichum trifolii</i>        | TDZ68275     |
| Kelch repeat containing protein       | 711 | 0      | 68  | 62.42 | <i>Colletotrichum chlorophyti</i>     | OLN85773     |

### 23) *Verticillium albo-atrum* contig NW\_NMXJ01000005, PKS-III

| Gene name                            | Size | E value | % Coverage | % identity | Top blast hit                      | Accession number of top blast hit |
|--------------------------------------|------|---------|------------|------------|------------------------------------|-----------------------------------|
| Dioxygenase                          | 395  | 0       | 100        | 74.43      | <i>Colletotrichum sojae</i>        | KAF6820147                        |
| Transporter                          | 585  | 0       | 96         | 77.03      | <i>Fusarium mundagurra</i>         | KAF5696253                        |
| Hypothetical protein                 | 372  | 1e-50   | 83         | 37.78      | <i>Trichoderma guizhouense</i>     | OPB42090                          |
| Carbonic anhydrase                   | 271  | 4e-152  | 98         | 75.94      | <i>Colletotrichum incanum</i>      | KZL87566                          |
| Hypothetical protein                 | 265  | 8e-10   | 37         | 33.98      | <i>Ophiocordyceps sinensis</i>     | EQL01270                          |
| Acetyltransferase                    | 268  | 9e-152  | 93         | 79.68      | <i>Colletotrichum chlorophyti</i>  | OLN95961                          |
| Oxidoreductase                       | 451  | 0       | 99         | 61.38      | <i>Colletotrichum higginsianum</i> | XP_018159254                      |
| NSS*                                 | 495  | NSS     | NSS        | NSS        | NSS                                | NSS                               |
| Feruloyl esterase                    | 295  | 7e-153  | 98         | 71.48      | <i>Colletotrichum orbiculare</i>   | TDZ25527                          |
| Fungal specific transcription factor | 804  | 0       | 100        | 72.75      | <i>Colletotrichum higginsianum</i> | TID06918                          |
| BFR2 protein                         | 588  | 0       | 100        | 63.13      | <i>Sodiomyces alkalinus</i>        | XP_028470322                      |
| Hypothetical protein                 | 136  | 2e-36   | 96         | 52.67      | <i>Colletotrichum spinosum</i>     | TDZ30131                          |
| PKS-III                              | 454  | 0       | 100        | 73.79      | <i>Colletotrichum simmondsii</i>   | KXH46773                          |
| Fructose biphosphate aldolase        | 362  | 0       | 100        | 88.67      | <i>Sodiomyces alkalinus</i>        | XP_028470318                      |
| Specific exonuclease                 | 1306 | 0       | 85         | 77.41      | <i>Sodiomyces alkalinus</i>        | XP_028470311                      |

\*No significant similarity found

### 24) *Verticillium alfalfae* contig NW\_003315037, vRPS-I-22 cluster

| Gene name                                            | Size | E value | % Coverage | % identity | Top blast hit                      | Accession number of top blast hit |
|------------------------------------------------------|------|---------|------------|------------|------------------------------------|-----------------------------------|
| RNA export protein                                   | 358  | 0       | 100        | 82.12      | <i>Colletotrichum musicola</i>     | KAF6822509                        |
| Hypothetical protein                                 | 297  | 1e-164  | 100        | 80.81      | <i>Sodiomyces alkalinus</i>        | XP_028463293                      |
| Ethanamine-phosphate cytidyltransferase like protein | 430  | 0       | 99         | 80.22      | <i>Colletotrichum spinosum</i>     | TDZ39069                          |
| Aminotransferase                                     | 394  | 0       | 100        | 65.81      | <i>Sodiomyces alkalinus</i>        | XP_028463295                      |
| Hypothetical protein                                 | 285  | 9e-08   | 69         | 28.29      | <i>Sodiomyces alkalinus</i>        | XP_028463296                      |
| Peroxiredoxin                                        | 412  | 2e-160  | 78         | 65.23      | <i>Plectosphaerella cucumerina</i> | KAH7362586                        |
| Methionine aminopeptidase                            | 448  | 0       | 99         | 75.95      | <i>Colletotrichum sidae</i>        | TEA17142                          |

|                             |      |        |     |       |                                    |              |
|-----------------------------|------|--------|-----|-------|------------------------------------|--------------|
| MSF-1                       | 192  | 2e-120 | 98  | 85.42 | <i>Sodiomyces alkalinus</i>        | XP_028463299 |
| Hypothetical protein        | 131  |        | 95  | 59.20 | <i>Plectosphaerella cucumerina</i> | KAH7362585   |
| Hypothetical protein        | 322  | 5e-25  | 95  | 29.13 | <i>Fusarium equiseti</i>           | CAG7565864   |
| Lactamase                   | 300  | 1e-137 | 100 | 62    | <i>Monosporascus sp.</i>           | RYP11973     |
| Sulfate permease            | 822  | 0      | 95  | 52.89 | <i>Massariosphaeria phaeospora</i> | KAF2866440   |
| PKS-I                       | 2554 | 0      | 95  | 70.42 | <i>Fusarium miscanthi</i>          | ALQ32877     |
| Glucosyl transferase        | 553  | 0      | 98  | 59.45 | <i>Fusarium austroafricanum</i>    | KAF4443747   |
| Esterase/Hydrolase          | 207  | 7e-99  | 100 | 64.22 | <i>Fusarium nygamai</i>            | PNP83713     |
| Monooxygenase               | 389  | 0      | 94  | 72.36 | <i>Bimuria novae-zelandiae</i>     | KAF1970089   |
| E-efflux pump               | 408  | 0      | 97  | 75.76 | <i>Colletotrichum graminicola</i>  | XP_008093595 |
| Oxidoreductase              | 372  | 5e-133 | 90  | 54.84 | <i>Fusarium sarcochroum</i>        | KAF4960431   |
| Hypothetical protein        | 253  | 2e-124 | 100 | 70.36 | <i>Plectosphaerella cucumerina</i> | KAH7357817   |
| Hypothetical protein        | 883  | 0      | 100 | 94.11 | <i>Verticillium nonalfalfae</i>    | XP_028494824 |
| Hypothetical protein        | 90   | 1e-37  | 97  | 75    | <i>Pseudomassariella vexata</i>    | XP_040719305 |
| Tubulin gamma chain protein | 461  | 0      | 100 | 96    | <i>Sodiomyces alkalinus</i>        | XP_028463304 |

#### 25) *Verticillium alfalfae* contig NW\_003315037, VRPKS-I-23 cluster

| Gene name                                              | Size | E value | % Coverage | % identity | Top blast hit                    | Accession number of top blast hit |
|--------------------------------------------------------|------|---------|------------|------------|----------------------------------|-----------------------------------|
| Myosin class II                                        | 2204 | 0       | 91         | 57.77      | <i>Sodiomyces alkalinus</i>      | XP_028465411                      |
| Signal recognition receptor                            | 652  | 0       | 99         | 74.15      | <i>Sodiomyces alkalinus</i>      | XP_028465413                      |
| Transport protein                                      | 352  | 0       | 100        | 85.54      | <i>Colletotrichum simmondsii</i> | KXH42740                          |
| PXMP 2/4 family protein                                | 255  | 4e-142  | 100        | 57.25      | <i>Colletotrichum musicola</i>   | KAF6806760                        |
| Virulence sensor protein/Heat shock protein 90 (Hsp90) | 1660 | 0       | 84         | 67.05      | <i>Sodiomyces alkalinus</i>      | XP_028465417                      |
| Drug resistance transporter                            | 485  | 0       | 99         | 53.12      | <i>Stylonectria norvegica</i>    | KAF7555861                        |
| PKS                                                    | 2402 | 0       | 100        | 49.71      | <i>Sodiomyces alkalinus</i>      | XP_028462492                      |
| Hypothetical protein                                   | 363  | 1e-98   | 99         | 48.44      | <i>Sodiomyces alkalinus</i>      | XP_028462491                      |
| Cocaine esterase                                       | 600  | 0       | 94         | 60.27      | <i>Sodiomyces alkalinus</i>      | XP_028462489                      |
| Hypothetical protein                                   | 242  | 2e-86   | 66         | 30.65      | <i>Sodiomyces alkalinus</i>      | XP_028462488                      |
| SnodProt1                                              | 138  | 1e-79   | 99         | 64.49      | <i>Hirsutella minnesotensis</i>  | KJZ76905                          |
| Hypothetical protein                                   | 146  | 1e-94   | 100        | 100        | <i>Verticillium dahliae</i>      | XP_009656175                      |
| Homoserine kinase                                      | 355  | 0       | 100        | 91.89      | <i>Colletotrichum tofieldiae</i> | KZL71078                          |
| Hypothetical protein                                   | 351  | 1e-59   | 100        | 36.86      | <i>Sodiomyces alkalinus</i>      | XP_028463289                      |

#### 26) *Verticillium alfalfae* contig NW\_003315034, VRPKS-I-9 and VRPKS-I-11 cluster

| Gene name                                | Size | E value | % Coverage | % identity | Top blast hit                            | Accession number of top blast hit |
|------------------------------------------|------|---------|------------|------------|------------------------------------------|-----------------------------------|
| Thioredoxin                              | 410  | 7e-169  | 63         | 73.21      | <i>Colletotrichum higginsianum</i>       | XP_018163738                      |
| X-PRO DIPEPTIDYL-PEPTIDASE PROTEIN       | 300  | 1e-147  | 100        | 69.10      | <i>Fusarium oxysporum</i> f. sp. melonis | EXK26648                          |
| Short chain dehydrogenase                | 228  | 9e-157  | 100        | 51.19      | <i>Plectosphaerella cucumerina</i>       | KAH7375436                        |
| Ankyrin repeat domain containing protein | 317  | 3e-15   | 67         | 47.69      | <i>Sordaria macrospora</i>               | XP_003349884                      |



|                                      |      |        |    |       |                               |              |
|--------------------------------------|------|--------|----|-------|-------------------------------|--------------|
| Efflux pump transporter              | 483  | 0      | 99 | 53.55 | Lasiodiplodia theobromae      | XP_035374841 |
| Short chain dehydrogenase            | 287  | 3e-96  | 99 | 56.14 | Hirsutella minnesotensis      | KJZ71235     |
| Hypothetical protein                 | 204  | 3e-52  | 97 | 38.33 | Lasiodiplodia theobromae      | XP_035374837 |
| PKS-NRPS C                           | 3529 | 0      | 99 | 39.48 | Lasiodiplodia theobromae      | KAF963027    |
| Fungal specific transcription factor | 819  | 5e-109 | 59 | 37.32 | Ilyonectria destructans       | KAH6995025   |
| Hypothetical protein                 | 435  | 2e-17  | 40 | 34.46 | Plectosphaerella cucumerina   | KAH7368326   |
| PKS-NRPS D                           | 3898 | 0      | 97 | 70.54 | <i>Hirsutella rhossilie</i>   | XP_044717051 |
| Mg transporter/Hypothetical protein  | 1143 | 3e-119 | 56 | 34.42 | Colletotrichum truncatum      | XP_036585489 |
| GTPase activator protein (Rho GAP)   | 238  | 0      | 72 | 65.47 | <i>Colletotrichum incanum</i> | KZL81424     |

**27) Verticillium alfalfae contig NW\_003315038, VRPKS-I-17 cluster**

| Gene name                                                 | Size | E value | % Coverage | % identity | Top blast hit                         | Accession number of top blast hit |
|-----------------------------------------------------------|------|---------|------------|------------|---------------------------------------|-----------------------------------|
| Golgi to ER traffic protein                               | 333  | 0       | 100        | 78.81      | <i>Colletotrichum gloeosporioides</i> | KAF3811196                        |
| putative mitochondrial import receptor                    | 352  | 0       | 100        | 83.90      | <i>Sodiomyces alkalinus</i>           | XP_028466992                      |
| putative 6-phosphofructo-2-kinase/fructose-2 like protein | 574  | 0       | 100        | 84.54      | <i>Plectosphaerella cucumerina</i>    | KAH7363100                        |
| Hydrolase                                                 | 697  | 3e-144  | 99         | 71.11      | <i>Plectosphaerella cucumerina</i>    | KAH7363099                        |
| 54S ribosomal protein                                     | 352  | 0       | 99         | 73.14      | <i>Sodiomyces alkalinus</i>           | XP_028466988                      |
| Hsp 70 nucleotide exchange factor                         | 172  | 3e-125  | 98         | 72.38      | <i>Sodiomyces alkalinus</i>           | XP_028466987                      |
| Actin                                                     | 375  | 0       | 100        | 100        | <i>Tolypocladium paradoxum</i>        | POR36442                          |
| ABC transporter                                           | 1326 | 0       | 99         | 72.84      | <i>Colletotrichum chlorophyti</i>     | OLN85600                          |
| Esterase/Hypothetical protein                             | 255  | 3e-151  | 100        | 79.30      | <i>Colletotrichum sojae</i>           | KAF6806434                        |
| R-PKS-I                                                   | 2391 | 0       | 99         | 70.58      | <i>Colletotrichum chlorophyti</i>     | OLN86478                          |
| Elongator complex protein                                 | 836  | 0       | 99         | 62.92      | <i>Colletotrichum tofieldiae</i>      | KZL71342                          |
| Ubiquitin modifier                                        | 104  | 1e-56   | 99         | 79.61      | <i>Claviceps pusilla</i>              | KAG6012378                        |
| Zinc finger protein (transcription factor)                | 439  | 2e-135  | 94         | 59.70      | <i>Colletotrichum musicola</i>        | KAF6845115                        |
| Mitochondrial FAD carrier protein                         | 196  | 3e-148  | 98         | 68.63      | <i>Colletotrichum sidae</i>           | TEA17977                          |

**28) Verticillium alfalfae contig NW\_003315038, VNRPKS-I-1 cluster**

| Gene name                                 | Size | E value | % Coverage | % identity | Top blast hit                      | Accession number of top blast hit |
|-------------------------------------------|------|---------|------------|------------|------------------------------------|-----------------------------------|
| Carrier Protein                           | 225  | 3e-126  | 96         | 76.39      | <i>Plectosphaerella cucumerina</i> | KAH7358165                        |
| U3 small nucleolar ribonucleoprotein IMP3 | 183  | 8e-117  | 100        | 88.52      | <i>Sodiomyces alkalinus</i>        | XP_028469265                      |
| 37S ribosomal protein                     | 207  | 5e-95   | 96         | 68.84      | <i>Sodiomyces alkalinus</i>        | XP_028469266                      |
| Complex I intermediate associate protein  | 710  | 0       | 99         | 74.16      | <i>Sodiomyces alkalinus</i>        | XP_028469267                      |
| Tetrahydroxynaphthalene reductase         | 284  | 1e-126  | 100        | 82.52      | <i>Colletotrichum fiorinae</i>     | EXF81015                          |
| L 2,4 diaminobutyrate decarboxylase       | 448  | 0       | 96         | 59.36      | <i>Colletotrichum sidae</i>        | TEA12782                          |
| Hypothetical protein                      | 201  | NA      | NA         | NA         | NA                                 | NA                                |
| Multicopper oxidase                       | 549  | 0       | 90         | 66.34      | <i>Colletotrichum tofieldiae</i>   | KZL72261                          |
| NR-PKS-I                                  | 2088 | 0       | 100        | 77.51      | <i>Colletotrichum karsti</i>       | XP_038751444                      |
| Oxidoreductase/Hypothetical protein       | 301  | 1e-117  | 99         | 71.17      | <i>Colletotrichum truncatum</i>    | XP_036586400                      |
| Hypothetical protein                      | 88   | NA      | NA         | NA         | NA                                 | NA                                |

|                                       |     |        |     |       |                                    |              |
|---------------------------------------|-----|--------|-----|-------|------------------------------------|--------------|
| Transcription factor CMR1             | 578 | 0      | 96  | 67.63 | <i>Colletotrichum truncatum</i>    | XP_036589502 |
| Fungal specific transcription factor  | 254 |        | 95  | 57.83 | <i>Colletotrichum incanum</i>      | OHW97099     |
| Glycosyl transferase                  | 325 | 4e-175 | 100 | 74.54 | <i>Plectosphaerella cucumerina</i> | KAH7358014   |
| Dihydrodipicolinate synthetase family | 143 | 4e-56  | 88  | 68.50 | <i>Fusarium fujikuroi</i>          | KLP22936     |

### 29) *Verticillium alfalfae* contig NW\_003315038, VRPKS-I-1 cluster

| Gene name                                                          | Size | E value | % Coverage | % identity | Top blast hit                      | Accession number of top blast hit |
|--------------------------------------------------------------------|------|---------|------------|------------|------------------------------------|-----------------------------------|
| Protein SYM1                                                       | 284  | 3e-125  | 83         | 74.49      | <i>Colletotrichum musicola</i>     | KAF6800315                        |
| Hypothetical protein                                               | 298  | 1e-91   | 94         | 59.45      | <i>Plectosphaerella cucumerina</i> | KAH7369210                        |
| Hypothetical protein                                               | 381  | 1e-115  | 99         | 59.25      | <i>Plectosphaerella cucumerina</i> | KAH7369210                        |
| Oxidoreductase                                                     | 332  | 0       | 100        | 75         | <i>Stachybotrys chartarum</i>      | KFA54517                          |
| Hypothetical protein                                               | 154  | 3e-73   | 100        | 69.48      | <i>Aspergillus udagawae</i>        | GFF25928                          |
| Hypothetical protein                                               | 198  | 2e-60   | 92         | 55.19      | <i>Diaporthe helianthi</i>         | POS73388                          |
| R-PKS-NRPS                                                         | 3750 | 0       | 99         | 52.92      | <i>Massariosphaeria phaeosp</i>    | KAF2874833                        |
| Hypothetical protein                                               | 330  | 5e-81   | 100        | 40.84      | <i>Phialocephala subalpina</i>     | CZR58350                          |
| Hydrolase/aminopeptidase                                           | 367  | 5e-95   | 94         | 49.43      | <i>Tothia fuscella</i>             | KAF2431630                        |
| Enoyl reductase                                                    | 195  | 5e-48   | 91         | 55.56      | <i>Aspergillus hiratsukae</i>      | KAF7118427                        |
| Hypothetical protein                                               | 195  | 2e-142  | 96         | 40.59      | <i>Lasiodiplodia theobromae</i>    | KAB2573329                        |
| Transcription factor (Isoflavipucine cluster transcription factor) | 266  | 6e-52   | 56         | 56.21      | <i>Torrubiella hemipterig</i>      | CEJ81614                          |
| Efflux pump/MFS-type efflux transporter                            | 586  | 0       | 92         | 70.59      | <i>Torrubiella hemipte</i>         | CEJ81615                          |
| Hypothetical protein/hydrolase                                     | 219  | 1e-58   | 65         | 52.05      | <i>Sodiomyces alkalinus</i>        | XP_028470755                      |
| AP-3 complex subunit beta-2 like protein                           | 304  | 4e-86   | 97         | 78.98      | <i>Colletotrichum truncatum</i>    | XP_036580440                      |
| RTA-1                                                              | 333  | 2e-112  | 99         | 52.51      | <i>Colletotrichum chlorophyti</i>  | OLN87357                          |

### 30) *Verticillium alfalfae* contig NW\_003315032, VRPKS-I-19 cluster

| Gene name                                    | Size | E value | % Coverage | % identity | Top blast hit                         | Accession number of top blast hit |
|----------------------------------------------|------|---------|------------|------------|---------------------------------------|-----------------------------------|
| Extracellular serine rich protein            | 216  | 9e-150  | 86         | 70.90      | <i>Colletotrichum higginsianum</i>    | XP_018161331                      |
| Hypothetical protein                         | 77   | 3e-21   | 97         | 55.13      | <i>Sodiomyces alkalinus</i>           | XP_028465568                      |
| Hypothetical protein                         | 288  | 5e-65   | 95         | 46.72      | <i>Acremonium chrysogenum</i>         | KFH42767                          |
| NADH ubiquinone oxidoreductase               | 151  | 9e-36   | 79         | 57.50      | <i>Thermothielavioides terrestris</i> | SPQ17832                          |
| Mitochondrial inner membrane translocase     | 544  | 0       | 100        | 75.61      | <i>Sodiomyces alkalinu</i>            | XP_028468965                      |
| Ribosomal protein                            | 89   | 3e-31   | 85         | 71.50      | <i>Colletotrichum fioriniae</i>       | EXF75199.                         |
| Obg like ATPase                              | 394  | 0       | 100        | 88.83      | <i>Claviceps africana</i>             | KAG5929667                        |
| Exopolysaccharuronase/Thioredoxin domain     | 364  | 2e-178  | 97         | 63.90      | <i>Monosporascus sp</i>               | RYP54678                          |
| Thioredoxin                                  | 162  | 8e-79   | 98         | 71.25      | <i>Colletotrichum orchidophilum</i>   | XP_022480245                      |
| Ammonium transporter/drug resistance protein | 576  | 0       | 98         | 69.80      | <i>Sodiomyces alkalinus</i>           | XP_028468956                      |
| PKS-I (mycosteroid acid synthase)            | 243  | 9e-82   | 98         | 50.35      | <i>Claviceps lovelessii</i>           | KAG6015049                        |
| R-PKS-I                                      | 1524 | 0       | 100        | 57.60      | <i>Claviceps citrina</i>              | KAG6041353                        |
| Esterase                                     | 237  | 2e-63   | 96         | 49.67      | <i>Claviceps citrina</i>              | KAG6041354                        |
| L-threonate dehydrogenase                    | 920  | 0       | 98         | 56.95      | <i>Colletotrichum orchidophilum</i>   | KAF4986227                        |
| Fungal specific transcription factor         | 623  | 0       | 100        | 65.63      | <i>Plectosphaerella cucumerina</i>    | KAH7363480                        |

|                                              |     |        |    |       |                                     |              |
|----------------------------------------------|-----|--------|----|-------|-------------------------------------|--------------|
| MFS transporter                              | 488 | 0      | 99 | 76.18 | <i>Colletotrichum chlorophyti</i>   | OLN87319     |
| Chromosome monooxygenase/chromosome P450     | 520 | 3e-113 | 84 | 39.86 | <i>Colletotrichum orchidophilum</i> | XP_022469251 |
| Alpha/beta hydrolase                         | 346 | 3e-117 | 98 | 53.80 | <i>Zopfia rhizophila</i>            | KAF2180147   |
| Cutinase                                     | 224 | 9e-116 | 91 | 80.39 | <i>Sodiomyces alkalinus</i>         | XP_028468955 |
| Vacuolar protein sorting associate protein 9 | 770 | 0      | 98 | 69.56 | <i>Colletotrichum orbiculare</i>    | TDZ20835     |
| Hypothetical protein                         | 477 | 2e-32  | 66 | 44.80 | <i>Colletotrichum tofieldiae</i>    | KZL68686     |
| Acetylxyylan esterase 2 like protein         | 566 | 3e-71  | 66 | 58.29 | <i>Colletotrichum siamense</i>      | KAF4811263   |

### 31) *Verticillium alfalfae* contig NW\_003315025, VRPKS-I-26 cluster

| Gene name                       | Size | E value | % Coverage | % identity | Top blast hit                       | Accession number of top blast hit |
|---------------------------------|------|---------|------------|------------|-------------------------------------|-----------------------------------|
| Short chain dehydrogenase       | 292  | 4e-124  | 99         | 59.45      | <i>Colletotrichum siamense</i>      | XP_036493403                      |
| Ankyrin repeat protein          | 1140 | 2e-108  | 62         | 34.87      | <i>Plectosphaerella cucumerina</i>  | KAH7362763                        |
| Hypothetical protein            | 1017 | 0       | 96         | 56.17      | <i>Paraphoma chrysanthemicola</i>   | KAH7091334                        |
| Hypothetical protein            | 577  | 0       | 100        | 86.70      | <i>Colletotrichum higginsianum</i>  | XP_018157666                      |
| Integral membrane protein       | 365  | 7e-168  | 99         | 69.56      | <i>Colletotrichum incanum</i>       | KZL85847                          |
| Dehydrogenase/oxidoreductase    | 582  | 0       | 96         | 75.62      | <i>Colletotrichum sublineola</i>    | KDN72067                          |
| Hypothetical protein            | 1241 | 0       | 69         | 71.30      | <i>Paraphoma chrysanthemicola</i>   | KAH7362743                        |
| PKS-I                           | 852  | 0       | 94         | 65.31      | <i>Monosporascus sp</i>             | RYP50633                          |
| Tubulin tyrosine ligase protein | 472  | 0       | 99         | 71.30      | <i>Coniochaeta sp.</i>              | KAB5518934                        |
| Short chain dehydrogenase       | 581  | 4e-164  | 50         | 69.77      | <i>Dactylonectria estremocensis</i> | KAH7144232                        |
| LEA domain containing protein   | 518  | 0       | 97         | 43         | <i>Colletotrichum orchidophilum</i> | XP_022467882                      |

### 32) *Verticillium alfalfae* contig NW\_003315023, VRPKS-I-23 cluster

| Gene name                                                        | Size | E value | % Coverage | % identity | Top blast hit                        | Accession number of top blast hit |
|------------------------------------------------------------------|------|---------|------------|------------|--------------------------------------|-----------------------------------|
| FAD binding domain/Acetate transporter                           | 667  | 0       | 68         | 68.47      | <i>Sodiomyces alkalinus</i>          | XP_028469411                      |
| Hydrolase                                                        | 381  | 1e-97   | 96         | 58.97      | <i>Sodiomyces alkalinus</i>          | XP_028463045                      |
| Phenol-2 monooxygenase                                           | 390  | 4e-114  | 99         | 70.56      | <i>Sodiomyces alkalinus</i>          | XP_028463046                      |
| Methyltransferase                                                | 430  | 0       | 100        | 60.29      | <i>Sodiomyces alkalinus</i>          | XP_028463047                      |
| Myb related protein B                                            | 421  | 3e-93   | 100        | 42.51      | <i>Sodiomyces alkalinus</i>          | XP_028463048                      |
| 3-oxoacyl reductase                                              | 283  | 4e-155  | 98         | 74.29      | <i>Akanthomyces lecanii</i>          | OAA81050                          |
| Non-canonical non-ribosomal peptide synthetase ascB like protein | 798  | 0       | 98         | 46.68      | <i>Sodiomyces alkalinus</i>          | XP_028463042                      |
| Phenolppthiocerol synthesis PKS (ppsA)                           | 1911 | 0       | 94         | 56.33      | <i>Tolypocladium ophioglossoides</i> | KND89106                          |
| Putative transporter                                             | 119  | 2e-38   | 85.54      | 68         | <i>Colletotrichum tofieldiae</i>     | KZL65137                          |
| MFS                                                              | 343  | 0       | 96         | 88.22      | <i>Colletotrichum chlorophyti</i>    | OLN93090                          |
| Pectate lyase                                                    | 243  | 2e-154  | 100        | 93         | <i>Plectosphaerella cucumerina</i>   | KAH7359289                        |
| Hypothetical protein                                             | 403  | 6e-100  | 99         | 45.82      | <i>Plectosphaerella cucumerina</i>   | KAH7349693                        |
| DNA damage binding protein                                       | 565  | 0       | 99         | 73.27      | <i>Plectosphaerella cucumerina</i>   | KAH7349692                        |
| Sterol 3-beta glucosyltransferase                                | 1359 | 0       | 97         | 68.71      | <i>Colletotrichum tropicale</i>      | KAF4825980                        |
| Cytochrome monooxygenase                                         | 274  | 7e-93   | 97         | 52.43      | <i>Colletotrichum higginsianum</i>   | TIC94206                          |
| Hypothetical protein                                             | 260  | 7e-115  | 95         | 65.30      | <i>Sporothrix insectorum</i>         | OAA62000                          |

### 33) *Verticillium alfalfae* contig NW\_003315025, PKS-III

| Gene name                                  | Size | E value | % Coverage | % identity | Top blast hit                      | Accession number of top blast hit |
|--------------------------------------------|------|---------|------------|------------|------------------------------------|-----------------------------------|
| Carbonic anhydrase                         | 858  | 1e-141  | 31         | 71.54      | <i>Colletotrichum simmondsii</i>   | KXH49803                          |
| Acetyltransferase                          | 92   | 3e-11   | 38         | 91.43      | <i>Colletotrichum higginsianum</i> | XP_018159255                      |
| Oxidoreductase                             | 451  | 0       | 98         | 60.54      | <i>Colletotrichum higginsianum</i> | XP_018159254                      |
| Fungal specific transcription factor       | 813  | 0       | 100        | 70.16      | <i>Colletotrichum incanum</i>      | KZL80546                          |
| BFR2 protein                               | 276  | 1e-123  | 90         | 63.41      | <i>Colletotrichum plurivorum</i>   | KAF6823613                        |
| PAB dependent poly A specific ribonuclease | 1947 | 0       | 55         | 77.73      | <i>Sodiomyces alkalinus</i>        | XP_028470311                      |
| Mitochondrial 2 oxoglutarate carrier       | 335  | 1e-170  | 100        | 86.27      | <i>Colletotrichum chlorophyti</i>  | OLN95994                          |
| Hypothetical protein                       | 646  | 3e-123  | 98         | 54.36      | <i>Colletotrichum truncatum</i>    | XP_036586171                      |
| Splicing factor spf30                      | 311  | 2e-148  | 100        | 72.81      | <i>Colletotrichum truncatum</i>    | XP_036586172                      |
| Iron sulfur protein                        | 137  | 4e-29   | 95         | 75.64      | <i>Colletotrichum plurivorum</i>   | KAF6823606                        |
| Cell division control protein              | 191  | 4e-95   | 98         | 70.37      | <i>Sodiomyces alkalinus</i>        | XP_028470317                      |
| NADH ubiquinone oxidoreductase             | 356  | 3e-23   | 43         | 60         | <i>Plectosphaerella plurivora</i>  | KAH6681192                        |
| Hypothetical protein                       | 426  | 2e-24   | 61         | 30.20      | <i>Fusarium longipes</i>           | RGP77896                          |

### 34) *Verticillium isaacii* contig\_NMXN01000002, VRPKS-I-16 cluster

| Gene name                                                                                         | Size | E value   | % Coverage | % identity | Top blast hit                                           | Accession number of top blast hit |
|---------------------------------------------------------------------------------------------------|------|-----------|------------|------------|---------------------------------------------------------|-----------------------------------|
| short chain dehydrogenase                                                                         | 332  | 6.00E-120 | 98%        | 59.88%     | <i>Colletotrichum higginsianum</i><br><i>IMI 349063</i> | XP_018159646.1                    |
| adenylate kinase                                                                                  | 268  | 2.00E-155 | 99%        | 81.34%     | <i>Colletotrichum karsti</i>                            | XP_038745165.1                    |
| LETM1 domain-containing protein mdm28 like                                                        | 542  | 0.00E+00  | 94%        | 75.73%     | <i>Plectosphaerella plurivora</i>                       | KAH6687845.1                      |
| Sorting nexin-4                                                                                   | 475  | 0         | 100%       | 80.17%     | <i>Plectosphaerella plurivora</i>                       | KAH6687844.1                      |
| Kexin like protein                                                                                | 859  | 0         | 97%        | 70.12%     | <i>Plectosphaerella plurivora</i>                       | KAH6687843.1                      |
| hypothetical protein B0T11DRAFT_7649                                                              | 1666 | 0.00E+00  | 95%        | 58.45%     | <i>Plectosphaerella cucumerina</i>                      | KAH7375268.1                      |
| putative RNA-binding protein c                                                                    | 188  | 3.00E-62  | 55%        | 91.35%     | <i>Colletotrichum liriopes</i>                          | GKT41776.1                        |
| hypothetical protein F5X68DRAFT_206337                                                            | 1067 | 0.00E+00  | 100%       | 59.80%     | <i>Plectosphaerella plurivora</i>                       | KAH6687840.1                      |
| glycosyl hydrolase                                                                                | 638  | 0.00E+00  | 94%        | 65.41%     | <i>Colletotrichum truncatum</i>                         | XP_036587401.1                    |
| serine hydrolase FSH                                                                              | 239  | 1.00E-78  | 100%       | 58.33%     | <i>Plectosphaerella plurivora</i>                       | KAH6673998.1                      |
| putative polyketide synthase                                                                      | 2575 | 0         | 99%        | 71.74%     | <i>Plectosphaerella cucumerina</i>                      | KAH7369281.1                      |
| Alpha/Beta hydrolase protein                                                                      | 557  | 0.00E+00  | 98%        | 65.09%     | <i>Plectosphaerella plurivora</i>                       | KAH6688446.1                      |
| hypothetical protein ACRE_054030                                                                  | 167  | 4.00E-64  | 100%       | 65.87%     | <i>Acremonium chrysogenum</i><br><i>ATCC 11550</i>      | KFH43814.1                        |
| flavin depend monooxygenase that catalyses the oxidation of rubrofusarin to 9-hydroxyrubrofusarin | 523  | 0         | 100%       | 77.71%     | <i>Fusarium albosuccineum</i>                           | KAF4463211.1                      |
| xylosidase/arabinosidase                                                                          | 625  | 0         | 95%        | 89.98%     | <i>Plectosphaerella plurivora</i>                       | KAH6670864.1                      |

|                                                                                 |     |           |      |        |                                   |                |
|---------------------------------------------------------------------------------|-----|-----------|------|--------|-----------------------------------|----------------|
| hypothetical protein DL764_000444                                               | 972 | 0         | 98%  | 77.80% | <i>Monosporascus ibericus</i>     | RYP10822.1     |
| hypothetical protein HYQ44_009310                                               | 169 | 3.00E-22  | 83%  | 57.82% | <i>Verticillium longisporum</i>   | KAG7111115.1   |
| Dolichyl-diphosphooligosaccharide--<br>protein glycosyltransferase subunit SWP1 | 287 | 2.00E-92  | 99%  | 58.54% | <i>Colletotrichum sidae</i>       | TEA10577.1     |
| glutaminyl-peptide cyclotransferase                                             | 388 | 0         | 100% | 72.63% | <i>Sodiomyces alkalinus F11</i>   | XP_028462781.1 |
| putative oxidoreductase YusZ                                                    | 284 | 5.00E-131 | 99%  | 65.25% | <i>Colletotrichum spaethianum</i> | GJC88340.1     |
| CDP-alcohol phosphatidyltransferase                                             | 427 | 0         | 92%  | 82.62% | <i>Sodiomyces alkalinus F11</i>   | XP_028462783.1 |

### 35) *Verticillium isaacii* contig\_NMXN01000005, VRPKS-I-23 cluster

| Gene name                                                     | Size | E value   | % Coverage | % identity | Top blast hit                       | Accession number of top blast hit |
|---------------------------------------------------------------|------|-----------|------------|------------|-------------------------------------|-----------------------------------|
| hypothetical protein CH063_11708                              | 26   | 3.20E-02  | 100%       | 73.33%     | <i>Colletotrichum higginsianum</i>  | CCF41433.1                        |
| Ribokinase-like protein                                       | 365  | 8.00E-65  | 98%        | 38.11%     | <i>Sodiomyces alkalinus F11</i>     | XP_028463289.1                    |
| homoserine kinase                                             | 356  | 0         | 100%       | 90.17%     | <i>Plectosphaerella cucumerina</i>  | KAH7362595.1                      |
| SnodProt1                                                     | 138  | 1.00E-65  | 100%       | 72.46%     | <i>Plectosphaerella cucumerina</i>  | KAH7368131.1                      |
| hypothetical protein<br>B0T11DRAFT_355575                     | 247  | 4.00E-07  | 36%        | 45.45%     | <i>Plectosphaerella cucumerina</i>  | KAH7358954.1                      |
| hypothetical protein<br>B0T11DRAFT_306916                     | 423  | 3.00E-101 | 91%        | 62.18%     | <i>Plectosphaerella cucumerina</i>  | KAH7358952.1                      |
| uncharacterized protein<br>CGCS363_v012205                    | 365  | 2.00E-104 | 93%        | 51.50%     | <i>Colletotrichum siamense</i>      | XP_036491211.1                    |
| aromatic prenyltransferase                                    | 456  | 0.00E+00  | 100%       | 68.49%     | <i>Plectosphaerella cucumerina</i>  | KAH7358950.1                      |
| phenolphthiocerol synthesis polyketide<br>synthase ppsA       | 2347 | 0         | 99%        | 51.79%     | <i>Sodiomyces alkalinus F11</i>     | XP_028462492.1                    |
| drug resistance transporter                                   | 588  | 0.00E+00  | 99%        | 70.31%     | <i>Plectosphaerella plurivora</i>   | KAH6697430.1                      |
| Hybrid signal transduction histidine kinase<br>K like protein | 1386 | 0         | 99%        | 66.50%     | <i>Plectosphaerella cucumerina</i>  | KAH7358170.1                      |
| hypothetical protein<br>B0T11DRAFT_299362                     | 220  | 5.00E-62  | 51%        | 82.30%     | <i>Plectosphaerella cucumerina</i>  | KAH7358281.1                      |
| hypothetical protein<br>B0T11DRAFT_284115                     | 230  | 1.00E-96  | 100%       | 75.65%     | <i>Plectosphaerella cucumerina</i>  | KAH7358280.1                      |
| uncharacterized protein CORC01_08067                          | 323  | 3.00E-168 | 100%       | 86.69%     | <i>Colletotrichum orchidophilum</i> | XP_022473766.1                    |
| SRP54-domain-containing protein                               | 689  | 0.00E+00  | 100%       | 78.59%     | <i>Sodiomyces alkalinus F11</i>     | XP_028465413.1                    |
| myosin class II heavy chain                                   | 1497 | 0         | 97%        | 62.47%     | <i>Sodiomyces alkalinus F11</i>     | XP_028465411.1                    |

### 36) *Verticillium isaacii* contig\_NMXN01000012, VRPKS-I-26 cluster

| Gene name                                         | Size | E value  | % Coverage | % identity | Top blast hit                     | Accession number of top blast hit |
|---------------------------------------------------|------|----------|------------|------------|-----------------------------------|-----------------------------------|
| hypothetical protein<br>F5X68DRAFT_228683         | 72   | 4.00E-04 | 31%        | 86.96%     | <i>Plectosphaerella plurivora</i> | KAH6692307.1                      |
| peptidase family C25-domain-containing<br>protein | 1017 | 0        | 99%        | 57.20%     | <i>Paraphoma chrysanthemicola</i> | KAH7091334.1                      |

|                                                                |      |           |      |        |                                                  |                |
|----------------------------------------------------------------|------|-----------|------|--------|--------------------------------------------------|----------------|
| hypothetical protein                                           | 578  | 0.00E+00  | 96%  | 88.33% | <i>Colletotrichum higginsianum</i><br>IMI 349063 | XP_018157666.1 |
| Satratoxin biosynthesis SC1 cluster protein 4                  | 758  | 2.00E-137 | 69%  | 58.71% | <i>Exophiala spinifera</i>                       | XP_016240708.1 |
| putative pectate lyase F                                       | 236  | 1.00E-140 | 97%  | 83.98% | <i>Colletotrichum gloeosporioides</i>            | XP_045257419.1 |
| hypothetical protein                                           | 1004 | 0.00E+00  | 100% | 72.87% | <i>Plectosphaerella cucumerina</i>               | KAH7362743.1   |
| hypothetical protein<br>B0T11DRAFT_318355                      | 163  | 4.00E-55  | 98%  | 65.85% | <i>Plectosphaerella cucumerina</i>               | KAH7362742.1   |
| uncharacterized protein KVR01_004169                           | 257  | 6.00E-06  | 22%  | 45.61% | <i>Diaporthe batatas</i>                         | XP_044646333.1 |
| putative polyketide synthase                                   | 2349 | 0         | 99%  | 52.38% | <i>Whalleya microplaca</i>                       | KAI1073750.1   |
| TTL domain-containing protein                                  | 473  | 0         | 100% | 73.65% | <i>Coniochaeta sp. 2T2.1</i>                     | KAB5518934.1   |
| retinol dehydrogenase                                          | 315  | 0.00E+00  | 99%  | 79.17% | <i>Plectosphaerella cucumerina</i>               | KAH7369374.1   |
| leucyl aminopeptidase                                          | 372  | 0.00E+00  | 100% | 79.03% | <i>Dactylonectria estremocensis</i>              | KAH7144232.1   |
| heterokaryon incompatibility protein-domain-containing protein | 742  | 0.00E+00  | 100% | 75.61% | <i>Chaetomium sp. MPI-CAGE-AT-0009</i>           | KAH6847694.1   |
| FAD-dependent monooxygenase                                    | 453  | 0         | 99%  | 86.89% | <i>Stachybotrys elegans</i>                      | KAH7303249.1   |
| glycosyl transferase                                           | 427  | 1.00E-137 | 77%  | 58.56% | <i>Trichoderma arundinaceum</i>                  | RFU78228.1     |
| alpha-l-rhamnosidase                                           | 898  | 0         | 92%  | 69.63% | <i>Colletotrichum truncatum</i>                  | XP_036586343.1 |
| hypothetical protein<br>SODALDRAFT_319240                      | 134  | 5.00E-25  | 95%  | 39.39% | <i>Sodiomyces alkalinus F11</i>                  | XP_028470409.1 |

### 37) *Verticillium isaacii* contig\_ NMXN01000007, VRPKS-I-19 cluster

| Gene name                                                                  | Size | E value   | % Coverage | % identity | Top blast hit                                   | Accession number of top blast hit |
|----------------------------------------------------------------------------|------|-----------|------------|------------|-------------------------------------------------|-----------------------------------|
| alpha glucoside transporter                                                | 542  | 0         | 99%        | 75.41%     | <i>Cylindrodendrum hubeiense</i>                | KAF7546071.1                      |
| hypothetical protein<br>SODALDRAFT_333514                                  | 77   | 2.00E-21  | 97%        | 55.13%     | <i>Sodiomyces alkalinus F11</i>                 | XP_028465568.1                    |
| hypothetical protein ACRE_064810                                           | 279  | 4.00E-82  | 98%        | 52.31%     | <i>Acremonium chrysogenum</i><br>ATCC 11550     | KFH42767.1                        |
| hypothetical protein B0J18DRAFT_6692                                       | 109  | 2.00E-28  | 78%        | 63.22%     | <i>Chaetomium sp. MPI-SDFR-AT-0129</i>          | KAH6634037.1                      |
| Mitochondrial import inner membrane translocase subunit tim44 like protein | 541  | 0         | 100%       | 75.69%     | <i>Sodiomyces alkalinus F11</i>                 | XP_028468965.1                    |
| hypothetical protein CFIO01_06157                                          | 250  | 3.00E-91  | 100%       | 56.00%     | <i>Colletotrichum fiorinae PJ7</i>              | EXF75199.1                        |
| DeSI-like protein sdu1                                                     | 239  | 2.00E-102 | 76%        | 82.07%     | <i>Colletotrichum orbiculare</i><br>MAFF 240422 | TDZ21862.1                        |
| Obg-like ATPase 1                                                          | 394  | 0         | 100%       | 90.61%     | <i>Pyricularia pennisetigena</i>                | XP_029751038.1                    |
| exopolygalacturonase B like protein                                        | 469  | 0.00E+00  | 94%        | 72.26%     | <i>Monosporascus sp. mg162</i>                  | RYP54678.1                        |
| hypothetical protein AK830_g4742                                           | 499  | 4.00E-75  | 82%        | 39.64%     | <i>Neonectria ditissima</i>                     | KPM41855.1                        |
| thioredoxin-like protein                                                   | 162  | 3.00E-85  | 98%        | 76.25%     | <i>Hypoxylon sp. FL0890</i>                     | KAI0834638.1                      |
| MFS general substrate transporter                                          | 578  | 0         | 97%        | 70.86%     | <i>Sodiomyces alkalinus F11</i>                 | XP_028468956.1                    |

|                                             |      |           |     |        |                                       |                |
|---------------------------------------------|------|-----------|-----|--------|---------------------------------------|----------------|
| hypothetical protein J1614_005793           | 297  | 5.00E-110 | 89% | 63.53% | <i>Leptosphaeria biglobosa</i>        | KAH9873395.1   |
| Type I Polyketide synthase                  | 2177 | 0.00E+00  | 99% | 77.43% | <i>Leptosphaeria biglobosa</i>        | KAH9873394.1   |
| L-threonate dehydrogenase like protein      | 1108 | 0.00E+00  | 99% | 71.90% | <i>Colletotrichum scovillei</i>       | XP_035328982.1 |
| hypothetical protein F5X68DRAFT_50483       | 688  | 0.00E+00  | 95% | 68.99% | <i>Plectosphaerella plurivora</i>     | KAH6669659.1   |
| major facilitator superfamily transporter   | 488  | 0         | 98% | 79.42% | <i>Colletotrichum incanum</i>         | OHW90295.1     |
| cutinase-2                                  | 224  | 7.00E-132 | 92% | 87.92% | <i>Plectosphaerella cucumerina</i>    | KAH7368196.1   |
| putative beta-glucosidase G                 | 832  | 0         | 99% | 68.77% | <i>Aspergillus sydowii</i> CBS 593.65 | XP_040708017.1 |
| vacuolar protein sorting-associated protein | 483  | 0         | 96% | 74.15% | <i>Plectosphaerella cucumerina</i>    | KAH7368195.1   |

### 38) *Verticillium isaacii* contig\_ NMXN01000010, VRPKS-I-18 cluster

| Gene name                                     | Size | E value   | % Coverage | % identity | Top blast hit                            | Accession number of top blast hit |
|-----------------------------------------------|------|-----------|------------|------------|------------------------------------------|-----------------------------------|
| Sec7 domain-containing protein                | 1558 | 0         | 99%        | 64.12%     | <i>Plectosphaerella plurivora</i>        | KAH6686645.1                      |
| glycosyl hydrolase family 16 protein          | 425  | 1.00E-135 | 64%        | 71.17%     | <i>Colletotrichum truncatum</i>          | XP_036580125.1                    |
| secreted protein                              | 211  | 2.00E-93  | 90%        | 76.96%     | <i>Sodiomyces alkalinus F11</i>          | XP_028465800.1                    |
| hypothetical protein ZTR_07120                | 526  | 0         | 98%        | 86.46%     | <i>Talaromyces verruculosus</i>          | KUL84026.1                        |
| general substrate transporter                 | 518  | 0.00E+00  | 98%        | 68.95%     | <i>Dactylonectria macrodidyma</i>        | KAH7160676.1                      |
| calcineurin-like phosphoesterase              | 363  | 0.00E+00  | 100%       | 72.45%     | <i>Plectosphaerella plurivora</i>        | KAH6686639.1                      |
| serine hydrolase FSH                          | 253  | 3.00E-134 | 99%        | 76.98%     | <i>Fulvia fulva</i>                      | UJO18001.1                        |
| AMP-dependent synthetase/ligase               | 611  | 5.00E-161 | 99%        | 44.19%     | <i>Hirsutella minnesotensis</i> 3608     | KJZ72768.1                        |
| Reducing polyketide synthase PKS2             | 2256 | 0         | 99%        | 75.10%     | <i>Fulvia fulva</i>                      | UJO18003.1                        |
| hypothetical protein BDW02DRAFT_369921        | 235  | 7.00E-55  | 100%       | 47.46%     | <i>Decorospora gaudefroyi</i>            | KAF1833738.1                      |
| carbohydrate-binding module family 50 protein | 686  | 0.00E+00  | 99%        | 58.67%     | <i>Plectosphaerella plurivora</i>        | KAH6684917.1                      |
| putative chitinase                            | 539  | 0         | 96%        | 80.73%     | <i>Decorospora gaudefroyi</i>            | KAF1833741.1                      |
| hypothetical protein P154DRAFT_517162         | 391  | 3.00E-119 | 100%       | 49.51%     | <i>Amniculicola lignicola</i> CBS 123094 | KAF2007437.1                      |
| SGNH hydrolase                                | 711  | 0.00E+00  | 100%       | 74.02%     | <i>Macroventuria anomochaeta</i>         | XP_033567680.1                    |
| glycoside hydrolase superfamily               | 751  | 0         | 98%        | 67.43%     | <i>Plectosphaerella plurivora</i>        | KAH6658770.1                      |
| hypothetical protein F5X68DRAFT_145888        | 1025 | 0.00E+00  | 98%        | 55.58%     | <i>Plectosphaerella plurivora</i>        | KAH6658772.1                      |
| putative UDP-glucose-4-epimerase              | 254  | 2.00E-127 | 98%        | 71.83%     | <i>Plectosphaerella cucumerina</i>       | KAH7366775.1                      |
| MFS general substrate transporter             | 471  | 6.00E-155 | 97%        | 51.52%     | <i>Oidiodendron maius</i> Zn             | KIN03209.1                        |

### 39) *Verticillium isaacii* contig\_ NMXN01000005, VRPKS-I-17 cluster

| Gene name                                          | Size | E value   | % Coverage | % identity | Top blast hit                          | Accession number of top blast hit |
|----------------------------------------------------|------|-----------|------------|------------|----------------------------------------|-----------------------------------|
| splicing factor 3b subunit 4                       | 370  | 1.00E-153 | 85%        | 80.82%     | Colletotrichum camelliae               | KAH0444958.1                      |
| Mitochondrial FAD carrier protein FLX1             | 310  | 3.00E-157 | 99%        | 74.30%     | Colletotrichum chlorophyti             | OLN84903.1                        |
| Asparagine-rich zinc finger protein AZF1 like      | 439  | 3.00E-122 | 88%        | 50.25%     | Colletotrichum fiorinae PJ7            | EXF85239.1                        |
| Urm1-domain-containing protein                     | 104  | 7.00E-56  | 96%        | 79.00%     | Xylaria curta                          | KAI0546841.1                      |
| elongator protein 2 (WD domain-containing protein) | 841  | 0         | 99%        | 67.50%     | Colletotrichum truncatum               | XP_036582858.1                    |
| Reducing polyketide synthase PKS2 like protein     | 113  | 9.00E-46  | 83%        | 75.53%     | Plectosphaerella cucumerina            | KAH7363092.1                      |
| Lovastatin diketide synthase LovF 16               | 2277 | 0         | 99%        | 71.71%     | Colletotrichum chlorophyti             | OLN86478.1                        |
| duf341 family                                      | 255  | 2.00E-147 | 100%       | 79.69%     | Colletotrichum sojae                   | KAF6806434.1                      |
| ABC transporter                                    | 1284 | 0         | 97%        | 70.95%     | Colletotrichum scovillei               | KAG7055337.1                      |
| Actin                                              | 375  | 0.00E+00  | 100%       | 100.00%    | Tolypocladium paradoxum                | POR36442.1                        |
| hsp70-like protein                                 | 209  | 3.00E-96  | 97%        | 71.08%     | Sodiomyces alkalinus F11               | XP_028466987.1                    |
| 54S ribosomal protein L7                           | 356  | 0         | 98%        | 76.42%     | Sodiomyces alkalinus F11               | XP_028466988.1                    |
| ubiquitin C-terminal hydrolase                     | 800  | 0         | 100%       | 63.79%     | Plectosphaerella cucumerina            | KAH7363099.1                      |
| 6-phosphofructo-2-kinase                           | 570  | 0         | 100%       | 84.78%     | Plectosphaerella cucumerina            | KAH7363100.1                      |
| mitochondrial import receptor subunit tom-40       | 352  | 0.00E+00  | 100%       | 83.33%     | Sodiomyces alkalinus F11               | XP_028466992.1                    |
| Isoflavone reductase                               | 307  | 3.00E-69  | 97%        | 48.84%     | Colletotrichum higginsianum IMI 349063 | XP_018160455.1                    |

#### 40) *Verticillium isaacii* contig\_ NMXN01000010, VRPKS-I-13 cluster

| Gene name                                               | Size | E value   | % Coverage | % identity | Top blast hit                         | Accession number of top blast hit |
|---------------------------------------------------------|------|-----------|------------|------------|---------------------------------------|-----------------------------------|
| major facilitator superfamily domain-containing protein | 130  | 5.00E-28  | 99%        | 40.00%     | <i>Xylariales sp. PMI_506</i>         | KAH8666575.1                      |
| uncharacterized protein CHGG_08617                      | 449  | 5.00E-170 | 92%        | 57.24%     | <i>Chaetomium globosum CBS 148.51</i> | XP_001226544.1                    |
| thiol-specific monooxygenase                            | 507  | 0.00E+00  | 99%        | 76.54%     | <i>Plectosphaerella plurivora</i>     | KAH6686480.1                      |
| glycogen debranching enzyme                             | 665  | 0.00E+00  | 98%        | 76.97%     | <i>Dactylonectria macrodidyma</i>     | KAH7115576.1                      |
| major facilitator superfamily domain-containing protein | 583  | 0.00E+00  | 100%       | 85.08%     | <i>Plectosphaerella cucumerina</i>    | KAH7368056.1                      |
| endoglucanase-1                                         | 233  | 2.00E-133 | 98%        | 78.60%     | <i>Plectosphaerella cucumerina</i>    | KAH7362705.1                      |
| hypothetical protein SODALDRAFT_4980                    | 221  | 3.00E-60  | 81%        | 60.22%     | <i>Sodiomyces alkalinus F11</i>       | XP_028469806.1                    |
| epoxide hydrolase                                       | 409  | 0.00E+00  | 98%        | 62.69%     | <i>Plectosphaerella plurivora</i>     | KAH6662678.1                      |
| endo-1,4-beta-glucanase                                 | 296  | 3.00E-93  | 81%        | 60.00%     | <i>Colletotrichum sojae</i>           | KAF6788143.1                      |
| hypothetical protein BT63DRAFT_423135                   | 236  | 4.00E-38  | 85%        | 73.63%     | <i>Microthyrium microscopium</i>      | KAF2670841.1                      |



|                                        |      |           |      |        |                                    |              |
|----------------------------------------|------|-----------|------|--------|------------------------------------|--------------|
| polyketide synthase                    | 3080 | 0.00E+00  | 99%  | 53.42% | <i>Fusarium avenaceum</i>          | KIL85244.1   |
| hypothetical protein FALBO_5956        | 314  | 0.00E+00  | 100% | 85.67% | <i>Fusarium albosuccineum</i>      | KAF4467173.1 |
| Uracil permease like protein           | 527  | 0         | 98%  | 73.43% | <i>Colletotrichum camelliae</i>    | KAH0420306.1 |
| 2OG-Fe oxygenase family protein        | 332  | 2.00E-158 | 99%  | 70.69% | <i>Colletotrichum incanum</i>      | OHW94343.1   |
| c6 transcription factor                | 585  | 0         | 99%  | 67.67% | <i>Plectosphaerella cucumerina</i> | KAH7362695.1 |
| hypothetical protein B0T11DRAFT_334166 | 256  | 2.00E-63  | 88%  | 48.02% | <i>Plectosphaerella cucumerina</i> | KAH7374617.1 |

#### 41) *Verticillium isaacii* contig\_ NMXN01000006, VRPKS-I-20 cluster

| Gene name                                                                           | Size | E value   | % Coverage | % identity | Top blast hit                             | Accession number of top blast hit |
|-------------------------------------------------------------------------------------|------|-----------|------------|------------|-------------------------------------------|-----------------------------------|
| SUMO-activating enzyme subunit uba-2                                                | 456  | 0         | 94%        | 74.54%     | <i>Sodiomyces alkalinus F11</i>           | XP_028470156.1                    |
| gluconate 5-dehydrogenase                                                           | 271  | 1.00E-105 | 99%        | 71.08%     | <i>Sodiomyces alkalinus F11</i>           | XP_028470157.1                    |
| feruloyl esterase b                                                                 | 315  | 8.00E-176 | 93%        | 79.52%     | <i>Colletotrichum musicola</i>            | KAF6811137.1                      |
| Dihydrosphingosine 1-phosphate phosphatase                                          | 554  | 0.00E+00  | 94%        | 73.57%     | <i>Colletotrichum asianum</i>             | KAF0325175.1                      |
| DNA damage-responsive transcriptional repressor RPH1                                | 1425 | 0         | 77%        | 66.19%     | <i>Colletotrichum fiorinae PJ7</i>        | EXF81018.1                        |
| mannan endo-1,4-beta-mannosidase                                                    | 401  | 0.00E+00  | 95%        | 82.81%     | <i>Plectosphaerella plurivora</i>         | KAH6695781.1                      |
| polyketide synthase                                                                 | 3430 | 0.00E+00  | 70%        | 47.07%     | <i>Ophiocordyceps camponoti-floridani</i> | KAF4594413.1                      |
| Alpha-ketoglutarate-dependent 2,4-dichlorophenoxyacetate dioxygenase                | 343  | 0.00E+00  | 98%        | 70.71%     | <i>Penicillium arizonense</i>             | XP_022486531.1                    |
| serine hydrolase FSH                                                                | 283  | 8.00E-91  | 100%       | 46.64%     | <i>Cordyceps sp. RAO-2017</i>             | PHH90555.1                        |
| Cytochrome P450 4V2 [                                                               | 542  | 0         | 100%       | 65.83%     | <i>Penicillium arizonense</i>             | XP_022486670.1                    |
| Chloramphenicol acetyltransferase-like domain protein [Metarhizium album ARSEF 1941 | 527  | 0         | 96%        | 55.83%     | <i>Akanthomyces lecanii RCEF 1005</i>     | OAA79799.1                        |
| hypothetical protein FALBO_6676                                                     | 100  | 2.00E-19  | 93%        | 49.46%     | <i>Fusarium albosuccineum</i>             | KAF4466462.1                      |
| glutamyl-tRNA amidotransferase subunit A                                            | 936  | 0         | 65%        | 70.26%     | <i>Plectosphaerella cucumerina</i>        | KAH7374727.1                      |
| hypothetical protein B0J13DRAFT_652468                                              | 254  | 4.00E-135 | 100%       | 74.41%     | <i>Dactylonectria estremocensis</i>       | KAH7118096.1                      |
| NAD-binding Rossmann fold oxidoreductase family protein                             | 354  | 0.00E+00  | 97%        | 73.84%     | <i>Talaromyces rugulosus</i>              | XP_035348268.1                    |
| hypothetical protein EDB80DRAFT_562441                                              | 1105 | 0.00E+00  | 62%        | 52.92%     | <i>Ilyonectria destructans</i>            | KAH7018764.1                      |

#### 42) *Verticillium isaacii* contig\_ NMXN01000012, PKS-III cluster

| Gene name | Size | E value | % Coverage | % identity | Top blast hit | Accession number of top blast hit |
|-----------|------|---------|------------|------------|---------------|-----------------------------------|
|-----------|------|---------|------------|------------|---------------|-----------------------------------|

|                                                                   |      |           |      |        |                                                         |                |
|-------------------------------------------------------------------|------|-----------|------|--------|---------------------------------------------------------|----------------|
| allantoate permease                                               | 503  | 0         | 100% | 84.68% | <i>Plectosphaerella cucumerina</i>                      | KAH7375308.1   |
| alpha-ketoglutarate-dependent sulfonate dioxygenase               | 378  | 0         | 100% | 84.13% | <i>Plectosphaerella plurivora</i>                       | KAH6681182.1   |
| hypothetical protein B0T11DRAFT_143288                            | 221  | 1.00E-85  | 88%  | 61.73% | <i>Plectosphaerella cucumerina</i>                      | KAH7347634.1   |
| hypothetical protein CPLU01_05979                                 | 289  | 9.00E-54  | 64%  | 48.44% | <i>Colletotrichum plurivorum</i>                        | KAF6832745.1   |
| carbonic anhydrase                                                | 271  | 4.00E-146 | 93%  | 76.77% | <i>Colletotrichum incanum</i>                           | KZL87566.1     |
| Acetyltransferase                                                 | 270  | 2.00E-149 | 87%  | 83.97% | <i>Colletotrichum higginsianum</i><br><i>IMI 349063</i> | XP_018159255.1 |
| oxidoreductase                                                    | 452  | 0         | 99%  | 64.67% | <i>Plectosphaerella plurivora</i>                       | KAH6681205.1   |
| Feruloyl esterase B                                               | 294  | 1.00E-150 | 91%  | 75.84% | <i>Colletotrichum orbiculare</i><br><i>MAFF 240422</i>  | TDZ25527.1     |
| transcriptional activator protein acu-15                          | 709  | 0         | 98%  | 73.83% | <i>Colletotrichum spaethianum</i>                       | GJC81216.1     |
| TRAUB-domain-containing protein                                   | 594  | 4.00E-132 | 78%  | 74.50% | <i>Plectosphaerella cucumerina</i>                      | KAH7375290.1   |
| hypothetical protein K456DRAFT_1765144                            | 127  | 7.00E-23  | 86%  | 58.93% | <i>Colletotrichum gloeosporioides 23</i>                | KAH9228351.1   |
| putative chalcone and stilbene synthase domain-containing protein | 444  | 0         | 100% | 75.73% | <i>Colletotrichum sublineola</i>                        | KDN65911.1     |
| fructose-bisphosphate aldolase                                    | 362  | 0         | 100% | 90.88% | <i>Plectosphaerella cucumerina</i>                      | KAH7375300.1   |
| PAB-dependent poly(A)-specific ribonuclease subunit PAN2          | 1082 | 0         | 98%  | 79.04% | <i>Plectosphaerella cucumerina</i>                      | KAH7375292.1   |
| uncharacterized protein D7B24_007593                              | 608  | 0         | 89%  | 68.93% | <i>Verticillium nonalfalfae</i>                         | XP_028494368.1 |
| putative mitochondrial 2-oxoglutarate/malate carrier protein      | 335  | 0         | 100% | 86.87% | <i>Colletotrichum chlorophyti</i>                       | OLN95994.1     |
| hypothetical protein B0T11DRAFT_249550                            | 637  | 2.00E-173 | 96%  | 60.57% | <i>Plectosphaerella cucumerina</i>                      | KAH7375296.1   |
| Splicing factor spf30                                             | 304  | 3.00E-113 | 99%  | 68.83% | <i>Colletotrichum truncatum</i>                         | XP_036586172.1 |
| Iron-sulfur protein IND1                                          | 296  | 7.00E-177 | 99%  | 79.59% | <i>Colletotrichum truncatum</i>                         | XP_036586173.1 |
| centrin-3                                                         | 189  | 2.00E-88  | 98%  | 68.09% | <i>Sodiomyces alkalinus F11</i>                         | XP_028470317.1 |
| short chain dehydrogenase                                         | 145  | 4.00E-75  | 100% | 83.45% | <i>Sodiomyces alkalinus F11</i>                         | XP_028470310.1 |

#### 43) *Verticillium isaacii* contig\_ NMXN01000003, VRPKS-I-14 cluster

| Gene name                              | Size | E value   | % Coverage | % identity | Top blast hit                               | Accession number of top blast hit |
|----------------------------------------|------|-----------|------------|------------|---------------------------------------------|-----------------------------------|
| hypothetical protein F4819DRAFT_459179 | 1030 | 0         | 95%        | 41.14%     | <i>Hypoxylon fuscum</i>                     | KAI1401228.1                      |
| Cytochrome P450 52A13                  | 519  | 0         | 97%        | 67.67%     | <i>Colletotrichum gloeosporioides</i>       | XP_045269785.1                    |
| hypothetical protein CGLO_06291        | 624  | 6.00E-155 | 92%        | 41.51%     | <i>Colletotrichum gloeosporioides Cg-14</i> | EQB53932.1                        |
| Acyl-CoA dehydrogenase/oxidase         | 596  | 0         | 92%        | 52.44%     | <i>Cordyceps javanica</i>                   | TQV95615.1                        |

|                                                    |      |           |      |        |                                              |                |
|----------------------------------------------------|------|-----------|------|--------|----------------------------------------------|----------------|
| fatty acid desaturase domain-containing protein    | 608  | 0         | 100% | 63.74% | <i>Sarocladium implicatum</i>                | KAH8177350.1   |
| putative polyketide synthase                       | 3079 | 0         | 100% | 56.21% | <i>Truncatella angustata</i>                 | KAH8198320.1   |
| putative major facilitator superfamily transporter | 584  | 0         | 83%  | 62.30% | <i>Truncatella angustata</i>                 | XP_045957260.1 |
| cytochrome P450                                    | 506  | 0         | 100% | 79.05% | <i>Plectosphaerella cucumerina</i>           | KAH7367666.1   |
| hypothetical protein CEP52_003390                  | 374  | 6.00E-159 | 97%  | 69.86% | <i>Fusarium sp. AF-4</i>                     | RSM10820.1     |
| short-chain dehydrogenase/reductase                | 310  | 1.00E-109 | 94%  | 50.93% | <i>Aspergillus flavipes</i>                  | A0A7L8UXK7.1   |
| hypothetical protein B0T11DRAFT_56928              | 204  | 7.00E-107 | 100% | 71.98% | <i>Plectosphaerella cucumerina</i>           | KAH7367670.1   |
| Vanillyl-alcohol oxidase                           | 562  | 0         | 99%  | 87.12% | <i>Plectosphaerella plurivora</i>            | KAH6673908.1   |
| Protein rds1 like protein                          | 497  | 0         | 92%  | 79.26% | <i>Sodiomyces alkalinus F11</i>              | XP_028471380.1 |
| FK506-binding protein 2                            | 191  | 2.00E-82  | 100% | 70.68% | <i>Colletotrichum orbiculare MAFF 240422</i> | TDZ17824.1     |
| hypothetical protein HYQ45_016732                  | 88   | 5.00E-04  | 100% | 71.43% | <i>Verticillium longisporum</i>              | KAG7113540.1   |
| hypothetical protein FALBO_210                     | 144  | 2.00E-69  | 98%  | 73.24% | <i>Fusarium albosuccineum</i>                | KAF4472888.1   |
| hypothetical protein F5883DRAFT_436293             | 1088 | 0         | 100% | 75.09% | <i>Diaporthaceae sp. PMI_573</i>             | KAH8748597.1   |

#### 44) *Verticillium isaacii* contig\_NMXN01000002, VRPKS-I-25 cluster

| Gene name                                                          | Size | E value   | % Coverage | % identity | Top blast hit                           | Accession number of top blast hit |
|--------------------------------------------------------------------|------|-----------|------------|------------|-----------------------------------------|-----------------------------------|
| RING-3 protein                                                     | 1475 | 0         | 43%        | 69.46%     | <i>Plectosphaerella plurivora</i>       | KAH6680056.1                      |
| glucosidase II beta subunit-like protein-domain-containing protein | 524  | 0         | 95%        | 63.23%     | <i>Plectosphaerella plurivora</i>       | KAH6680057.1                      |
| GNAT family n-acetyltransferase                                    | 187  | 4.00E-90  | 99%        | 64.17%     | <i>Clonostachys solani</i>              | CAH0054579.1                      |
| key lime pathogenicity protein                                     | 673  | 6.00E-146 | 86%        | 51.24%     | <i>Colletotrichum sublineola</i>        | KDN66949.1                        |
| hypothetical protein SODALDRAFT_165672                             | 374  | 3.00E-44  | 90%        | 42.36%     | <i>Sodiomyces alkalinus F11</i>         | XP_028466392.1                    |
| S-adenosyl-L-methionine-dependent methyltransferase                | 313  | 6.00E-156 | 92%        | 81.10%     | <i>Sodiomyces alkalinus F11</i>         | XP_028466391.1                    |
| dihydroxy-acid dehydratase                                         | 651  | 0         | 99%        | 85.23%     | <i>Plectosphaerella plurivora</i>       | KAH6671001.1                      |
| NAD(P)-binding protein                                             | 363  | 0         | 100%       | 85.00%     | <i>Stachybotrys chartarum IBT 7711</i>  | KEY68920.1                        |
| short chain dehydrogenase                                          | 340  | 0         | 92%        | 85.99%     | <i>Stachybotrys chartarum IBT 7711</i>  | KEY68921.1                        |
| polyketide synthase                                                | 2356 | 0         | 99%        | 89.64%     | <i>Stachybotrys chartarum IBT 40293</i> | KFA46917.1                        |
| beta-xylosidase (glycosyl hydrolase)                               | 603  | 0         | 95%        | 85.07%     | <i>Colletotrichum truncatum</i>         | XP_036575294.1                    |
| hypothetical protein ColLi_06807                                   | 527  | 0         | 87%        | 59.10%     | <i>Colletotrichum liriopes</i>          | GKT46626.1                        |
| Thiol-specific monooxygenase                                       | 492  | 0         | 98%        | 67.56%     | <i>Colletotrichum fructicola</i>        | XP_031891081.1                    |

|                                                |      |           |     |        |                                    |                |
|------------------------------------------------|------|-----------|-----|--------|------------------------------------|----------------|
| Protein STB5-like protein 3                    | 765  | 0         | 88% | 61.73% | <i>Colletotrichum chlorophyti</i>  | OLN81943.1     |
| Sodium transport ATPase 5 like protein         | 1071 | 0         | 98% | 74.30% | <i>Monosporascus sp. MG133</i>     | RYP34097.1     |
| bifunctional polynucleotide phosphatase/kinase | 453  | 0         | 99% | 67.69% | <i>Sodiomyces alkalinus F11</i>    | XP_028468241.1 |
| mediator complex, subunit Med18                | 269  | 2.00E-164 | 99% | 80.07% | <i>Plectosphaerella cucumerina</i> | KAH7347312.1   |
| C6 transcription factor                        | 326  | 1.00E-116 | 90% | 62.75% | <i>Plectosphaerella cucumerina</i> | KAH7366962.1   |

#### 45) *Verticillium isaacii* contig\_ NMXN01000008, VRPKS-I-2 cluster

| Gene name                                               | Size | E value   | % Coverage | % identity | Top blast hit                            | Accession number of top blast hit |
|---------------------------------------------------------|------|-----------|------------|------------|------------------------------------------|-----------------------------------|
| HpcH/HpaI aldolase                                      | 225  | 4.00E-149 | 100%       | 96.89%     | <i>Plectosphaerella cucumerina</i>       | KAH7362559.1                      |
| sugar transporter domain-containing protein             | 547  | 0         | 99%        | 87.36%     | <i>Plectosphaerella cucumerina</i>       | KAH7362558.1                      |
| major facilitator superfamily transporter               | 496  | 0         | 100%       | 85.92%     | <i>Plectosphaerella cucumerina</i>       | KAH7362562.1                      |
| hypothetical protein B0T11DRAFT_233715                  | 493  | 0         | 93%        | 71.71%     | <i>Plectosphaerella cucumerina</i>       | KAH7374470.1                      |
| O-methyltransferase                                     | 235  | 1.00E-110 | 100%       | 69.36%     | <i>Plectosphaerella plurivora</i>        | KAH6687359.1                      |
| putative 1-aminocyclopropane-1-carboxylate synthase     | 416  | 0         | 97%        | 72.24%     | <i>Plectosphaerella plurivora</i>        | KAH6687356.1                      |
| major facilitator superfamily domain-containing protein | 996  | 0         | 57%        | 82.11%     | <i>Plectosphaerella plurivora</i>        | KAH6687355.1                      |
| alcohol dehydrogenase-like protein                      | 353  | 0         | 99%        | 90.06%     | <i>Colletotrichum fructicola</i>         | XP_031875992.1                    |
| Polyketide synthase-nonribosomal peptide synthetase     | 435  | 0         | 100%       | 87.82%     | <i>Colletotrichum fructicola</i>         | XP_031875984.1                    |
| polyketide synthetase                                   | 3917 | 0         | 100%       | 85.82%     | <i>Colletotrichum fructicola</i>         | KAF4886526.1                      |
| Alpha/beta hydrolase                                    | 433  | 0         | 99%        | 84.22%     | <i>Colletotrichum fructicola</i>         | XP_031875995.1                    |
| Major Facilitator Superfamily protein                   | 584  | 0         | 99%        | 84.96%     | <i>Colletotrichum fructicola</i>         | KAF4886521.1                      |
| uncharacterized protein CGMCC3_g17405                   | 193  | 5.00E-125 | 100%       | 87.56%     | <i>Colletotrichum fructicola</i>         | XP_031875990.1                    |
| D-isomer specific 2-hydroxyacid dehydrogenase           | 326  | 0         | 99%        | 78.59%     | <i>Plectosphaerella plurivora</i>        | KAH6689062.1                      |
| PPR1-transcription factor regulating pyrimidine pathway | 466  | 2.00E-111 | 99%        | 55.52%     | <i>Plectosphaerella plurivora</i>        | KAH6689063.1                      |
| smr domain-containing protein                           | 730  | 0         | 100%       | 84.17%     | <i>Colletotrichum graminicola M1.001</i> | XP_008090428.1                    |

#### 46) *Verticillium isaacii* contig\_ NMXN01000005, VRPKS-I-12 and VNRPKS-I-1 clusters

| Gene name                          | Size | E value  | % Coverage | % identity | Top blast hit                   | Accession number of top blast hit |
|------------------------------------|------|----------|------------|------------|---------------------------------|-----------------------------------|
| hypothetical protein FPOAC1_009761 | 238  | 3.00E-82 | 89%        | 59.72%     | <i>Fusarium poae</i>            | XP_044706852.1                    |
| cytochrome P450                    | 476  | 0        | 97%        | 74.57%     | <i>Sodiomyces alkalinus F11</i> | XP_028469280.1                    |

|                                              |      |           |      |        |                                             |                |
|----------------------------------------------|------|-----------|------|--------|---------------------------------------------|----------------|
| beta-ketoacyl synthase                       | 366  | 8.00E-89  | 99%  | 46.51% | <i>Thelonectria olida</i>                   | KAH6899712.1   |
| eukaryotic aspartyl protease                 | 432  | 0         | 96%  | 56.73% | <i>Colletotrichum simmondsii</i>            | KXH41725.1     |
| FAD/NAD(P)-binding domain-containing protein | 419  | 0         | 93%  | 72.11% | <i>Sodiomyces alkalinus F11</i>             | XP_028469276.1 |
| hypothetical protein SODALDRAFT_331204       | 890  | 0         | 86%  | 70.91% | <i>Sodiomyces alkalinus F11</i>             | XP_028469275.1 |
| polyketide synthase                          | 3948 | 0         | 97%  | 75.30% | <i>Sodiomyces alkalinus F11</i>             | XP_028469272.1 |
| L-2,4-diaminobutyrate decarboxylase          | 514  | 0         | 88%  | 64.41% | <i>Colletotrichum trifolii</i>              | TDZ67276.1     |
| duf92 domain protein                         | 388  | 5.00E-130 | 99%  | 62.37% | <i>Sodiomyces alkalinus F11</i>             | XP_028469270.1 |
| uncharacterized protein CTRU02_08118         | 316  | 0.016     | 61%  | 24.77% | <i>Colletotrichum truncatum</i>             | XP_036582041.1 |
| multicopper oxidase                          | 561  | 0         | 98%  | 67.88% | <i>Plectosphaerella cucumerina</i>          | KAH7358155.1   |
| Conidial pigment polyketide synthase         | 2188 | 0         | 100% | 78.78% | <i>Colletotrichum gloeosporioides Cg-14</i> | EQB55056.1     |
| oxidoreductase                               | 325  | 0         | 99%  | 84.88% | <i>Colletotrichum truncatum</i>             | XP_036586400.1 |
| transcription factor                         | 424  | 2.00E-148 | 100% | 56.88% | <i>Colletotrichum incanum</i>               | KZL86702.1     |
| transcription factor Cmr1                    | 894  | 0         | 100% | 72.43% | <i>Colletotrichum musicola</i>              | KAF6845250.1   |

**47) *Verticillium isaacii* contig\_ NMXN01000008, VRPKS-I-6 cluster**

| Gene name                                                                          | Size | E value   | % Coverage | % identity | Top blast hit                           | Accession number of top blast hit |
|------------------------------------------------------------------------------------|------|-----------|------------|------------|-----------------------------------------|-----------------------------------|
| cytochrome P450                                                                    | 462  | 0         | 99%        | 65.81%     | <i>Aspergillus avenaceus</i>            | KAE8150739.1                      |
| putative alcohol dehydrogenase                                                     | 370  | 0         | 100%       | 79.73%     | <i>Xylariaceae sp. FL0016</i>           | KAI1344559.1                      |
| cytochrome P450                                                                    | 529  | 0         | 93%        | 67.87%     | <i>Aspergillus alliaceus</i>            | XP_031905229.1                    |
| solid-state culture-specific protein-like protein                                  | 466  | 0         | 99%        | 63.42%     | <i>Didymosphaeria enalia</i>            | KAF2268085.1                      |
| ABC transporter                                                                    | 1166 | 0         | 90%        | 58.76%     | <i>Clohesyomyces aquaticus</i>          | ORY13587.1                        |
| solid-state culture-specific ATP-grasp domain protein                              | 470  | 0         | 100%       | 65.32%     | <i>Didymosphaeria enalia</i>            | KAF2268082.1                      |
| putative hybrid NRPS/PKS enzyme                                                    | 3987 | 0         | 99%        | 57.65%     | <i>Xylariomycetidae sp. FL2044</i>      | KAH9905503.1                      |
| serine hydrolase-domain-containing protein                                         | 284  | 1.00E-131 | 100%       | 63.03%     | <i>Xylariaceae sp. FL0016</i>           | KAI1344560.1                      |
| Dihydrolipoyllysine-residue acetyltransferase component of acetoin cleaving system | 215  | 2.00E-79  | 94%        | 50.78%     | <i>Colletotrichum siamense</i>          | XP_036493445.1                    |
| thioredoxin                                                                        | 332  | 4.00E-172 | 100%       | 72.89%     | <i>Plectosphaerella plurivora</i>       | KAH6691560.1                      |
| putative polyol transporter 2                                                      | 599  | 0         | 99%        | 82.58%     | <i>Ilyonectria sp. MPI-CAGE-AT-0026</i> | KAH6967656.1                      |
| Transaldolase                                                                      | 365  | 0         | 100%       | 87.16%     | <i>Colletotrichum siamense</i>          | KAF4850344.1                      |
| hypothetical protein B0T10DRAFT_76705                                              | 250  | 1.00E-48  | 73%        | 51.49%     | <i>Thelonectria olida</i>               | KAH6887013.1                      |
| hypothetical protein C8035_v000460                                                 | 325  | 1.00E-129 | 97%        | 63.66%     | <i>Colletotrichum spinosum</i>          | TDZ12713.1                        |

|                                   |     |           |     |        |                                    |              |
|-----------------------------------|-----|-----------|-----|--------|------------------------------------|--------------|
| hypothetical protein CH35J_006353 | 643 | 2.00E-127 | 80% | 46.34% | <i>Colletotrichum higginsianum</i> | TIC99959.1   |
| MFS sugar transporter             | 489 | 0         | 97% | 74.11% | <i>Colletotrichum sojae</i>        | KAF6797496.1 |
| protein PXR1                      | 366 | 2.00E-75  | 50% | 82.64% | <i>Plectosphaerella cucumerina</i> | KAH7368324.1 |
| hypothetical protein HYQ45_010318 | 159 | 1.00E-45  | 78% | 64.00% | <i>Verticillium longisporum</i>    | KAG7131019.1 |

**48) *Verticillium isaacii* contig\_ NMXXN01000006, VRPKS-I-5 cluster**

| Gene name                                               | Size | E value   | % Coverage | % identity | Top blast hit                          | Accession number of top blast hit |
|---------------------------------------------------------|------|-----------|------------|------------|----------------------------------------|-----------------------------------|
| hypothetical protein jhhlp_008516                       | 710  | 0         | 99%        | 73.50%     | <i>Lomentospora prolificans</i>        | PKS05149.1                        |
| Isochorismatase-like protein                            | 244  | 6.00E-126 | 90%        | 76.13%     | <i>Plectosphaerella plurivora</i>      | KAH6676014.1                      |
| hypothetical protein B0T11DRAFT_333834                  | 160  | 4.00E-32  | 63%        | 64.71%     | <i>Plectosphaerella cucumerina</i>     | KAH7347765.1                      |
| DUF636 domain-containing protein                        | 137  | 9.00E-68  | 100%       | 83.94%     | <i>Purpureocillium lilacinum</i>       | XP_018184317.1                    |
| putative PKS-NRPS protein                               | 3934 | 0         | 99%        | 65.20%     | <i>Biscogniauxia sp. FL1348</i>        | KAI0597589.1                      |
| hypothetical protein B0I37DRAFT_378309                  | 507  | 4.00E-63  | 62%        | 57.67%     | <i>Chaetomium sp. MPI-CAGE-AT-0009</i> | KAH6844803.1                      |
| hypothetical protein BGAL_0184g00240                    | 226  | 4.00E-71  | 84%        | 57.81%     | <i>Botrytis galanthina</i>             | THV49682.1                        |
| major facilitator superfamily-domain-containing protein | 612  | 0         | 89%        | 72.68%     | <i>Biscogniauxia sp. FL1348</i>        | KAI0597572.1                      |
| glutathione S-transferase domain-containing protein     | 224  | 1.00E-124 | 99%        | 78.92%     | <i>fungus sp. No.14919</i>             | GAW23379.1                        |
| hypothetical protein SODALDRAFT_41197                   | 1568 | 0         | 98%        | 67.49%     | <i>Sodiomyces alkalinus F11</i>        | XP_028471323.1                    |
| GPI-GlcNAc transferase complex                          | 222  | 2.00E-38  | 97%        | 63.13%     | <i>Plectosphaerella cucumerina</i>     | KAH7347756.1                      |
| pseudouridine synthase                                  | 602  | 0         | 97%        | 52.59%     | <i>Sodiomyces alkalinus F11</i>        | XP_028471325.1                    |
| GTP-binding protein RHO2                                | 187  | 3.00E-108 | 100%       | 79.68%     | <i>Colletotrichum tanacetii</i>        | TKW53379.1                        |
| DNA-directed RNA polymerase III subunit RPC9            | 119  | 2.00E-38  | 75%        | 67.78%     | <i>Sodiomyces alkalinus F11</i>        | XP_028471326.1                    |

**49) *Verticillium isaacii* contig\_ NMXXN01000009, VRPKS-I-9 cluster**

| Gene name                                               | Size | E value   | % Coverage | % identity | Top blast hit                                | Accession number of top blast hit |
|---------------------------------------------------------|------|-----------|------------|------------|----------------------------------------------|-----------------------------------|
| hypothetical protein S40285_06408                       | 391  | 9.00E-110 | 92%        | 55.12%     | <i>Stachybotrys chlorohalonata IBT 40285</i> | KFA62410.1                        |
| FAD dependent oxidoreductase                            | 440  | 0         | 97%        | 77.52%     | <i>Plectosphaerella cucumerina</i>           | KAH7368673.1                      |
| major facilitator superfamily domain-containing protein | 538  | 0         | 99%        | 83.27%     | <i>Plectosphaerella cucumerina</i>           | KAH7368674.1                      |
| uncharacterized protein B0I36DRAFT_355828               | 178  | 1.00E-10  | 37%        | 78.79%     | <i>Microdochium trichocladiopsis</i>         | XP_046005612.1                    |
| acetamidase                                             | 558  | 0         | 99%        | 77.74%     | <i>Plectosphaerella plurivora</i>            | KAH6684967.1                      |
| polyketide synthase 3                                   | 4064 | 0         | 99%        | 72.13%     | <i>Hirsutella rhossiliensis</i>              | XP_044717051.1                    |

|                                          |     |           |      |        |                                         |                |
|------------------------------------------|-----|-----------|------|--------|-----------------------------------------|----------------|
| hypothetical protein CEP52_015090        | 549 | 8.00E-48  | 44%  | 41.06% | <i>Fusarium sp. AF-4</i>                | RSL88831.1     |
| lipase                                   | 560 | 0         | 96%  | 68.96% | <i>Plectosphaerella cucumerina</i>      | KAH7376670.1   |
| polysaccharide deacetylase               | 518 | 5.00E-156 | 69%  | 78.33% | <i>Plectosphaerella cucumerina</i>      | KAH7374645.1   |
| hypothetical protein B0T11DRAFT_318679   | 477 | 1.00E-108 | 45%  | 72.81% | <i>Plectosphaerella cucumerina</i>      | KAH7363183.1   |
| hypothetical protein ISF_06027           | 85  | 8.00E-22  | 75%  | 57.81% | <i>Cordyceps fumosorosea ARSEF 2679</i> | XP_018703129.1 |
| tetratricopeptide repeat protein 1       | 285 | 2.00E-108 | 89%  | 79.22% | <i>Colletotrichum karsti</i>            | XP_038750970.1 |
| HAD-like protein                         | 270 | 3.00E-135 | 99%  | 71.32% | <i>Stachybotrys chartarum IBT 40288</i> | KFA78825.1     |
| C6 zinc finger domain-containing protein | 701 | 0         | 100% | 66.53% | <i>Colletotrichum incanum</i>           | OHX01157.1     |

**50) *Verticillium klebahnii* contig\_NMXL01000003, VRPKS-I-16 cluster**

| Gene name                                                                                         | Size | E value   | % Coverage | % identity | Top blast hit                            | Accession number of top blast hit |
|---------------------------------------------------------------------------------------------------|------|-----------|------------|------------|------------------------------------------|-----------------------------------|
| choline/ethanolaminephosphotransferase                                                            | 418  | 0.00E+00  | 94%        | 82.74%     | <i>Sodiomyces alkalinus F11</i>          | XP_028462783.1                    |
| estradiol 17-beta-dehydrogenase (short-chain dehydrogenase)                                       | 284  | 2.00E-126 | 99%        | 63.83%     | <i>Colletotrichum tofieldiae</i>         | KZL75089.1                        |
| glutaminy-peptide cyclotransferase                                                                | 388  | 0.00E+00  | 100%       | 72.63%     | <i>Sodiomyces alkalinus F11</i>          | XP_028462781.1                    |
| Dolichyl-diphosphooligosaccharide--protein glycosyltransferase subunit SWP1                       | 287  | 3.00E-92  | 99%        | 58.19%     | <i>Colletotrichum sidae</i>              | TEA10577.1                        |
| hypothetical protein HYQ44_009310                                                                 | 169  | 3.00E-24  | 87%        | 57.24%     | <i>Verticillium longisporum</i>          | KAG7111115.1                      |
| putative copper-transporting ATPase                                                               | 1069 | 0.00E+00  | 100%       | 80.50%     | <i>Monosporascus ibericus</i>            | RYP10822.1                        |
| xylosidase/arabinosidase                                                                          | 599  | 0.00E+00  | 100%       | 90.48%     | <i>Plectosphaerella plurivora</i>        | KAH6670864.1                      |
| flavin depend monooxygenase that catalyses the oxidation of rubrofusarin to 9-hydroxyrubrofusarin | 524  | 0.00E+00  | 100%       | 78.86%     | <i>Fusarium albosuccineum</i>            | KAF4463211.1                      |
| hypothetical protein ACRE_054030                                                                  | 167  | 7.00E-64  | 100%       | 65.87%     | <i>Acremonium chrysogenum ATCC 11550</i> | KFH43814.1                        |
| Alpha/Beta hydrolase protein                                                                      | 557  | 0         | 94%        | 66.10%     | <i>Plectosphaerella plurivora</i>        | KAH6688446.1                      |
| putative polyketide synthase                                                                      | 2603 | 0         | 99%        | 72.37%     | <i>Plectosphaerella cucumerina</i>       | KAH7369281.1                      |
| serine hydrolase FSH                                                                              | 239  | 1.00E-78  | 100%       | 58.33%     | <i>Plectosphaerella plurivora</i>        | KAH6673998.1                      |
| glycosyl hydrolase                                                                                | 656  | 0         | 94%        | 63.12%     | <i>Colletotrichum gloeosporioides</i>    | XP_045266644.1                    |
| Spindle pole body protein ppc89                                                                   | 1066 | 0         | 100%       | 59.44%     | <i>Plectosphaerella cucumerina</i>       | KAH7375266.1                      |
| putative RNA-binding proteinc                                                                     | 188  | 3.00E-62  | 55%        | 91.35%     | <i>Colletotrichum liriopes</i>           | GKT41776.1                        |
| hypothetical protein B0T11DRAFT_7649                                                              | 1667 | 0.00E+00  | 96%        | 57.78%     | <i>Plectosphaerella cucumerina</i>       | KAH7375268.1                      |
| subtilase                                                                                         | 859  | 0.00E+00  | 97%        | 71.07%     | <i>Plectosphaerella plurivora</i>        | KAH6687843.1                      |
| Sorting nexin-4                                                                                   | 475  | 0         | 100%       | 80.17%     | <i>Plectosphaerella plurivora</i>        | KAH6687844.1                      |
| mitochondrial distribution and morphology protein                                                 | 542  | 0         | 94%        | 75.73%     | <i>Plectosphaerella plurivora</i>        | KAH6687845.1                      |

|                  |     |           |     |        |                              |                |
|------------------|-----|-----------|-----|--------|------------------------------|----------------|
| adenylate kinase | 268 | 4.00E-155 | 99% | 80.97% | <i>Colletotrichum karsti</i> | XP_038745165.1 |
|------------------|-----|-----------|-----|--------|------------------------------|----------------|

**51) *Verticillium klebahnii* contig\_ NMXL01000003, VRPKS-I-17 cluster**

| Gene name                                          | Size | E value   | % Coverage | % identity | Top blast hit                                 | Accession number of top blast hit |
|----------------------------------------------------|------|-----------|------------|------------|-----------------------------------------------|-----------------------------------|
| mRNA degradation protein pet127, mitochondrial     | 234  | 3.00E-41  | 53%        | 59.20%     | <i>Sodiomyces alkalinus F11</i>               | XP_028466993.1                    |
| splicing factor 3b subunit 4                       | 372  | 8.00E-157 | 85%        | 80.50%     | <i>Colletotrichum camelliae</i>               | KAH0444958.1                      |
| Mitochondrial FAD carrier protein FLX1             | 310  | 7.00E-158 | 99%        | 74.61%     | <i>Colletotrichum chlorophyti</i>             | OLN84903.1                        |
| Asparagine-rich zinc finger protein AZF1 like      | 439  | 1.00E-122 | 88%        | 50.25%     | <i>Colletotrichum fiorinae PJ7</i>            | EXF85239.1                        |
| ubiquitin-like modifier 1                          | 104  | 1.00E-56  | 96%        | 80.00%     | <i>Xylaria curta</i>                          | KAI0546841.1                      |
| elongator protein 2 (WD domain-containing protein) | 840  | 0         | 100%       | 67.18%     | <i>Colletotrichum tofieldiae</i>              | KZL71342.1                        |
| hypothetical protein B0T11DRAFT_282059             | 113  | 9.00E-46  | 83%        | 75.53%     | <i>Plectosphaerella cucumerina</i>            | KAH7363092.1                      |
| Lovastatin diketide synthase LovF 16               | 2277 | 0         | 99%        | 71.80%     | <i>Colletotrichum chlorophyti</i>             | OLN86478.1                        |
| Esterase FUS5 like protein                         | 255  | 2.00E-147 | 100%       | 79.69%     | <i>Colletotrichum sojae</i>                   | KAF6806434.1                      |
| ABC transporter                                    | 1284 | 0         | 97%        | 70.71%     | <i>Colletotrichum scovillei</i>               | KAG7055337.1                      |
| RF-1 domain-containing protein                     | 148  | 3.00E-41  | 70%        | 88.57%     | <i>Colletotrichum siamense</i>                | XP_036497959.1                    |
| Actin                                              | 375  | 0         | 100%       | 100.00%    | <i>Tolypocladium paradoxum</i>                | POR36442.1                        |
| hsp70-like protein                                 | 209  | 3.00E-96  | 97%        | 71.08%     | <i>Sodiomyces alkalinus F11</i>               | XP_028466987.1                    |
| 54S ribosomal protein L7                           | 356  | 0         | 98%        | 76.42%     | <i>Sodiomyces alkalinus F11</i>               | XP_028466988.1                    |
| ubiquitin C-terminal hydrolase                     | 800  | 0         | 100%       | 64.03%     | <i>Plectosphaerella cucumerina</i>            | KAH7363099.1                      |
| 6-phosphofructo-2-kinase                           | 558  | 0         | 100%       | 82.87%     | <i>Plectosphaerella cucumerina</i>            | KAH7363100.1                      |
| Mitochondrial import receptor subunit tom-40       | 352  | 0         | 100%       | 83.33%     | <i>Sodiomyces alkalinus F11</i>               | XP_028466992.1                    |
| Isoflavone reductase                               | 307  | 1.00E-63  | 98%        | 50.99%     | <i>Colletotrichum higginsianum IMI 349063</i> | XP_018160455.1                    |

**52) *Verticillium klebahnii* contig\_ NMXL01000003, VRPKS-I-23 cluster**

| Gene name                              | Size | E value  | % Coverage | % identity | Top blast hit                      | Accession number of top blast hit |
|----------------------------------------|------|----------|------------|------------|------------------------------------|-----------------------------------|
| Ribokinase-like protein                | 366  | 6.00E-55 | 98%        | 36.80%     | <i>Sodiomyces alkalinus F11</i>    | XP_028463289.1                    |
| homoserine kinase                      | 356  | 0        | 100%       | 90.17%     | <i>Plectosphaerella cucumerina</i> | KAH7362595.1                      |
| SnodProt1                              | 138  | 5.00E-66 | 100%       | 72.46%     | <i>Plectosphaerella cucumerina</i> | KAH7368131.1                      |
| hypothetical protein B0T11DRAFT_355575 | 247  | 7.00E-07 | 35%        | 45.36%     | <i>Plectosphaerella cucumerina</i> | KAH7358954.1                      |
| hypothetical protein F5X68DRAFT_4497   | 851  | 0        | 97%        | 62.98%     | <i>Plectosphaerella plurivora</i>  | KAH6697434.1                      |



|                                                      |      |           |      |        |                                     |                |
|------------------------------------------------------|------|-----------|------|--------|-------------------------------------|----------------|
| uncharacterized protein<br>CGCS363_v012205           | 365  | 6.00E-105 | 93%  | 51.77% | <i>Colletotrichum siamense</i>      | XP_036491211.1 |
| aromatic prenyltransferase                           | 456  | 0         | 100% | 68.93% | <i>Plectosphaerella cucumerina</i>  | KAH7358950.1   |
| phenolphthiocerol synthesis polyketide synthase ppsA | 2382 | 0         | 99%  | 46.01% | <i>Plectosphaerella plurivora</i>   | KAH6697431.1   |
| drug resistance transporter                          | 588  | 0         | 99%  | 69.80% | <i>Plectosphaerella plurivora</i>   | KAH6697430.1   |
| hsp90-like protein                                   | 1386 | 0         | 99%  | 66.35% | <i>Plectosphaerella cucumerina</i>  | KAH7358170.1   |
| hypothetical protein<br>B0T11DRAFT_299362            | 190  | 2.00E-62  | 59%  | 82.30% | <i>Plectosphaerella cucumerina</i>  | KAH7358281.1   |
| hypothetical protein<br>B0T11DRAFT_284115            | 230  | 5.00E-98  | 100% | 76.09% | <i>Plectosphaerella cucumerina</i>  | KAH7358280.1   |
| uncharacterized protein CORC01_08067                 | 323  | 3.00E-168 | 100% | 86.69% | <i>Colletotrichum orchidophilum</i> | XP_022473766.1 |
| SRP54-domain-containing protein                      | 689  | 0         | 100% | 78.88% | <i>Sodiomyces alkalinus F11</i>     | XP_028465413.1 |
| hypothetical protein<br>SODALDRAFT_201001            | 1689 | 0         | 99%  | 61.07% | <i>Sodiomyces alkalinus F11</i>     | XP_028465411.1 |

#### 53) *Verticillium klebahnii* contig\_ NMXL01000003, VNRPKS-I-2 cluster

| Gene name                                        | Size | E value   | % Coverage | % identity | Top blast hit                      | Accession number of top blast hit |
|--------------------------------------------------|------|-----------|------------|------------|------------------------------------|-----------------------------------|
| major facilitator superfamily protein            | 529  | 0         | 96%        | 77.80%     | <i>Sarocladium implicatum</i>      | KAH8171005.1                      |
| TAP-like protein-domain-containing protein       | 539  | 0         | 100%       | 76.30%     | <i>Plectosphaerella cucumerina</i> | KAH7367786.1                      |
| general substrate transporter                    | 547  | 0         | 94%        | 80.35%     | <i>Xylariomycetidae sp. FL2044</i> | KAH9886191.1                      |
| endoglucanase                                    | 253  | 3.00E-130 | 88%        | 92.86%     | <i>Plectosphaerella cucumerina</i> | KAH7361706.1                      |
| cysteine synthase                                | 316  | 0         | 99%        | 80.25%     | <i>Fusarium decemcellulare</i>     | KAF5004266.1                      |
| O-methyltransferase MdmC                         | 184  | 3.00E-97  | 94%        | 82.76%     | <i>Colletotrichum chlorophyti</i>  | OLN96991.1                        |
| hypothetical protein<br>B0T11DRAFT_330726        | 208  | 2.00E-49  | 85%        | 48.59%     | <i>Plectosphaerella cucumerina</i> | KAH7358996.1                      |
| Bacteriodes thetaiotaomicron symbiotic chitinase | 154  | 7.00E-51  | 98%        | 60.26%     | <i>Scedosporium apiospermum</i>    | XP_016643895.1                    |
| Bacteriodes thetaiotaomicron symbiotic chitinase | 515  | 0         | 97%        | 52.05%     | <i>Scedosporium apiospermum</i>    | XP_016643895.1                    |
| PKS16 protein                                    | 2431 | 0         | 76%        | 80.96%     | <i>Monosporascus ibericus</i>      | RYP01440.1                        |
| putative monooxygenase                           | 413  | 0         | 94%        | 83.17%     | <i>Monosporascus ibericus</i>      | RYP01441.1                        |
| hypothetical protein CDV31_016912                | 239  | 1.00E-64  | 66%        | 66.88%     | <i>Fusarium ambrosium</i>          | RSL82673.1                        |

#### 54) *Verticillium klebahnii* contig\_ NMXL01000017, VRPKS-I-25 cluster

| Gene name                                                          | Size | E value | % Coverage | % identity | Top blast hit                     | Accession number of top blast hit |
|--------------------------------------------------------------------|------|---------|------------|------------|-----------------------------------|-----------------------------------|
| RING-3 protein                                                     | 1173 | 0       | 54%        | 69.46%     | <i>Plectosphaerella plurivora</i> | KAH6680056.1                      |
| glucosidase II beta subunit-like protein-domain-containing protein | 524  | 0       | 95%        | 63.62%     | <i>Plectosphaerella plurivora</i> | KAH6680057.1                      |

|                                                     |      |           |     |        |                                         |                |
|-----------------------------------------------------|------|-----------|-----|--------|-----------------------------------------|----------------|
| unnamed protein product                             | 187  | 3.00E-90  | 99% | 64.17% | <i>Clonostachys solani</i>              | CAH0054579.1   |
| hypothetical protein CFIO01_00827                   | 673  | 3.00E-145 | 93% | 49.08% | <i>Colletotrichum fiorinae PJ7</i>      | EXF83685.1     |
| hypothetical protein SODALDRAFT_165672              | 374  | 7.00E-52  | 74% | 45.21% | <i>Sodiomyces alkalinus F11</i>         | XP_028466392.1 |
| S-adenosyl-L-methionine-dependent methyltransferase | 313  | 1.00E-156 | 92% | 81.44% | <i>Sodiomyces alkalinus F11</i>         | XP_028466391.1 |
| dihydroxy-acid dehydratase                          | 616  | 0         | 99% | 81.73% | <i>Plectosphaerella plurivora</i>       | KAH6671001.1   |
| polyketide synthase                                 | 2356 | 0         | 99% | 89.34% | <i>Stachybotrys chartarum IBT 40293</i> | KFA46917.1     |
| beta-xylosidase                                     | 563  | 0         | 94% | 86.49% | <i>Colletotrichum tofieldiae</i>        | GKT66924.1     |
| hypothetical protein ColLi_06807                    | 527  | 5.00E-158 | 85% | 58.64% | <i>Colletotrichum liriopes</i>          | GKT46626.1     |
| uncharacterized protein CGMCC3_g2624                | 492  | 0         | 98% | 67.36% | <i>Colletotrichum fruticola</i>         | XP_031891081.1 |
| Protein STB5-like protein 3                         | 769  | 0         | 88% | 61.73% | <i>Colletotrichum chlorophyti</i>       | OLN81943.1     |
| Sodium transport ATPase 5 like protein              | 1071 | 0         | 98% | 74.11% | <i>Monosporascus sp. MG133</i>          | RYP34097.1     |
| bifunctional polynucleotide phosphatase/kinase      | 454  | 0         | 99% | 67.32% | <i>Sodiomyces alkalinus F11</i>         | XP_028468241.1 |
| mediator complex, subunit Med18                     | 269  | 5.00E-165 | 99% | 80.07% | <i>Plectosphaerella cucumerina</i>      | KAH7347312.1   |
| hypothetical protein B0T11DRAFT_49340               | 364  | 7.00E-117 | 92% | 51.00% | <i>Plectosphaerella cucumerina</i>      | KAH7366962.1   |

#### 55) *Verticillium klebahnii* contig\_ NMXL01000002, VRPKS-I-13 cluster

| Gene name                                               | Size | E value   | % Coverage | % identity | Top blast hit                       | Accession number of top blast hit |
|---------------------------------------------------------|------|-----------|------------|------------|-------------------------------------|-----------------------------------|
| major facilitator superfamily domain-containing protein | 203  | 2.00E-40  | 77%        | 46.34%     | <i>Xylariales sp. PMI_506</i>       | KAH8666575.1                      |
| hypothetical protein MCOR01_008058                      | 449  | 1.00E-172 | 96%        | 56.04%     | <i>Pyricularia oryzae</i>           | KAH8841391.1                      |
| thiol-specific monooxygenase                            | 396  | 0         | 100%       | 75.00%     | <i>Plectosphaerella plurivora</i>   | KAH6686480.1                      |
| glycogen debranching enzyme                             | 665  | 0         | 98%        | 76.97%     | <i>Dactylonectria macrodidyma</i>   | KAH7115576.1                      |
| uncharacterized protein VDAG_02217                      | 236  | 1.00E-71  | 100%       | 44.44%     | <i>Verticillium dahliae VdLs.17</i> | XP_009656541.1                    |
| major facilitator superfamily domain-containing protein | 583  | 0         | 100%       | 85.08%     | <i>Plectosphaerella cucumerina</i>  | KAH7368056.1                      |
| endoglucanase-1                                         | 233  | 2.00E-133 | 98%        | 78.60%     | <i>Plectosphaerella cucumerina</i>  | KAH7362705.1                      |
| hypothetical protein SODALDRAFT_4980                    | 234  | 2.00E-49  | 66%        | 62.58%     | <i>Sodiomyces alkalinus F11</i>     | XP_028469806.1                    |
| epoxide hydrolase                                       | 409  | 0         | 98%        | 62.44%     | <i>Plectosphaerella plurivora</i>   | KAH6662678.1                      |
| Endoglucanase-4 like protein                            | 296  | 7.00E-95  | 81%        | 56.56%     | <i>Colletotrichum karsti</i>        | XP_038740775.1                    |
| hypothetical protein BT63DRAFT_423135                   | 233  | 2.00E-32  | 75%        | 74.14%     | <i>Microthyrium microscopicum</i>   | KAF2670841.1                      |
| polyketide synthase                                     | 3128 | 0         | 99%        | 53.50%     | <i>Fusarium avenaceum</i>           | KIL85244.1                        |
| hypothetical protein FALBO_5956                         | 314  | 0         | 100%       | 85.67%     | <i>Fusarium albosuccineum</i>       | KAF4467173.1                      |

|                                           |     |           |      |        |                                             |                |
|-------------------------------------------|-----|-----------|------|--------|---------------------------------------------|----------------|
| hypothetical protein<br>TRIATDRAFT_297088 | 194 | 2.00E-44  | 100% | 45.88% | <i>Trichoderma atroviride</i> IMI<br>206040 | XP_013948886.1 |
| hypothetical protein CcaCcLH18_14085      | 488 | 0         | 97%  | 81.72% | <i>Colletotrichum camelliae</i>             | KAH0420306.1   |
| 2OG-Fe oxygenase family protein           | 332 | 5.00E-159 | 99%  | 70.69% | <i>Colletotrichum incanum</i>               | OHW94343.1     |

**56) *Verticillium klebahnii* contig\_ NMXL01000002, VRPKS-I-18 cluster**

| Gene name                                     | Size | E value   | % Coverage | % identity | Top blast hit                                   | Accession number of top blast hit |
|-----------------------------------------------|------|-----------|------------|------------|-------------------------------------------------|-----------------------------------|
| PH and SEC7 domain-containing protein         | 1558 | 0         | 99%        | 56.35%     | <i>Fusarium oxysporum</i> f. sp. <i>cubense</i> | TVY79447.1                        |
| glycosyl hydrolase family 16 protein          | 425  | 1.00E-135 | 64%        | 71.17%     | <i>Colletotrichum truncatum</i>                 | XP_036580125.1                    |
| secreted protein                              | 211  | 2.00E-93  | 90%        | 76.96%     | <i>Sodiomyces alkalinus</i> F11                 | XP_028465800.1                    |
| Putative Sulfatase                            | 526  | 0         | 98%        | 85.69%     | <i>Talaromyces verruculosus</i>                 | KUL84026.1                        |
| general substrate transporter                 | 518  | 0         | 98%        | 68.75%     | <i>Dactylonectria macrodidyma</i>               | KAH7160676.1                      |
| calcineurin-like phosphoesterase              | 363  | 0         | 100%       | 71.63%     | <i>Plectosphaerella plurivora</i>               | KAH6686639.1                      |
| serine hydrolase FSH                          | 270  | 1.00E-124 | 99%        | 69.89%     | <i>Fulvia fulva</i>                             | UJO18001.1                        |
| Reducing polyketide synthase PKS2             | 2561 | 0         | 77%        | 70.63%     | <i>Fulvia fulva</i>                             | UJO18003.1                        |
| hypothetical protein<br>BDW02DRAFT_369921     | 235  | 4.00E-49  | 100%       | 47.46%     | <i>Decorospora gaudefroyi</i>                   | KAF1833738.1                      |
| carbohydrate-binding module family 50 protein | 686  | 0         | 99%        | 58.67%     | <i>Plectosphaerella plurivora</i>               | KAH6684917.1                      |
| glycoside hydrolase superfamily               | 539  | 0         | 96%        | 80.50%     | <i>Decorospora gaudefroyi</i>                   | KAF1833741.1                      |
| hypothetical protein P154DRAFT_517162         | 391  | 8.00E-122 | 100%       | 50.24%     | <i>Amniculicola lignicola</i> CBS<br>123094     | KAF2007437.1                      |
| SGNH hydrolase                                | 711  | 0         | 100%       | 74.16%     | <i>Macroventuria anomochaeta</i>                | XP_033567680.1                    |
| glycoside hydrolase superfamily               | 734  | 0         | 98%        | 66.80%     | <i>Plectosphaerella plurivora</i>               | KAH6658770.1                      |
| hypothetical protein<br>F5X68DRAFT_145888     | 1025 | 0         | 98%        | 55.68%     | <i>Plectosphaerella plurivora</i>               | KAH6658772.1                      |
| hypothetical protein<br>B0T11DRAFT_325103     | 254  | 3.00E-123 | 98%        | 70.24%     | <i>Plectosphaerella cucumerina</i>              | KAH7366775.1                      |
| MFS general substrate transporter             | 320  | 5.00E-114 | 97%        | 56.91%     | <i>Oidiodendron maius</i> Zn                    | KIN03209.1                        |

**57) *Verticillium klebahnii* contig\_ NMXL01000006, VRPKS-I-19 cluster**

| Gene name                                   | Size | E value   | % Coverage | % identity | Top blast hit                            | Accession number of top blast hit |
|---------------------------------------------|------|-----------|------------|------------|------------------------------------------|-----------------------------------|
| vacuolar protein sorting-associated protein | 756  | 0         | 98%        | 74.28%     | <i>Plectosphaerella cucumerina</i>       | KAH7368195.1                      |
| putative beta-glucosidase G                 | 832  | 0         | 99%        | 68.40%     | <i>Aspergillus sydowii</i> CBS<br>593.65 | XP_040708017.1                    |
| cutinase-2                                  | 224  | 5.00E-131 | 92%        | 87.44%     | <i>Plectosphaerella cucumerina</i>       | KAH7368196.1                      |

|                                                               |      |           |      |        |                                          |                |
|---------------------------------------------------------------|------|-----------|------|--------|------------------------------------------|----------------|
| major facilitator superfamily transporter [                   | 1118 | 0         | 96%  | 67.96% | <i>Colletotrichum karsti</i>             | XP_038748329.1 |
| L-threonate dehydrogenase like protein                        | 1108 | 0         | 99%  | 72.10% | <i>Colletotrichum graminicola M1.001</i> | XP_008095607.1 |
| Type I Polyketide synthase                                    | 2177 | 0         | 99%  | 77.25% | <i>Leptosphaeria biglobosa</i>           | KAH9873394.1   |
| hypothetical protein J1614_005793                             | 229  | 7.00E-96  | 97%  | 66.96% | <i>Leptosphaeria biglobosa</i>           | KAH9873395.1   |
| MFS general substrate transporter                             | 575  | 0         | 98%  | 67.21% | <i>Sodiomyces alkalinus F11</i>          | XP_028468956.1 |
| thioredoxin-like protein                                      | 162  | 3.00E-85  | 98%  | 76.25% | <i>Hypoxylon sp. FL0890</i>              | KAI0834638.1   |
| hypothetical protein AK830_g4742                              | 499  | 5.00E-87  | 91%  | 38.32% | <i>Neonectria ditissima</i>              | KPM41855.1     |
| exopolysaccharuronase                                         | 461  | 0         | 93%  | 70.47% | <i>Monosporascus sp. mg162</i>           | RYP54678.1     |
| Obg-like ATPase 1                                             | 394  | 0         | 100% | 90.36% | <i>Pyricularia grisea</i>                | XP_030984371.1 |
| DeSI-like protein sdu1                                        | 235  | 3.00E-114 | 99%  | 75.97% | <i>Colletotrichum chlorophyti</i>        | OLN97068.1     |
| putative 37S ribosomal protein S18 like                       | 250  | 3.00E-91  | 100% | 56.00% | <i>Colletotrichum fiorinae PJ7</i>       | EXF75199.1     |
| Mitochondrial import inner membrane translocase subunit tim44 | 541  | 0         | 100% | 75.69% | <i>Sodiomyces alkalinus F11</i>          | XP_028468965.1 |
| N-glycosidase like protein                                    | 190  | 4.00E-56  | 83%  | 57.86% | <i>Plectosphaerella cucumerina</i>       | KAH7347667.1   |
| hypothetical protein ACRE_064810                              | 287  | 3.00E-81  | 95%  | 51.26% | <i>Acremonium chrysogenum ATCC 11550</i> | KFH42767.1     |
| hypothetical protein SODALDRAFT_333514                        | 77   | 2.00E-21  | 97%  | 55.13% | <i>Sodiomyces alkalinus F11</i>          | XP_028465568.1 |
| alpha-glucosides permease MPH2/3                              | 542  | 0         | 99%  | 75.41% | <i>Cylindrodendrum hubeiense</i>         | KAF7546071.1   |

**58) *Verticillium klebahnii* contig\_ NMXL01000001, VRPKS-I-20 cluster**

| Gene name                                            | Size | E value   | % Coverage | % identity | Top blast hit                         | Accession number of top blast hit |
|------------------------------------------------------|------|-----------|------------|------------|---------------------------------------|-----------------------------------|
| Ubiquitin-activating enzyme E1-like                  | 610  | 0         | 96%        | 77.68%     | <i>Sodiomyces alkalinus F11</i>       | XP_028470156.1                    |
| 3-oxoacyl-[acyl-carrier-protein] reductase           | 271  | 2.00E-105 | 99%        | 71.33%     | <i>Sodiomyces alkalinus F11</i>       | XP_028470157.1                    |
| feruloyl esterase b                                  | 315  | 1.00E-175 | 93%        | 79.18%     | <i>Colletotrichum musicola</i>        | KAF6811137.1                      |
| Dihydrosphingosine 1-phosphate phosphatase           | 554  | 0         | 94%        | 73.57%     | <i>Colletotrichum asianum</i>         | KAF0325175.1                      |
| DNA damage-responsive transcriptional repressor RPH1 | 1748 | 0         | 62%        | 65.68%     | <i>Colletotrichum fiorinae PJ7</i>    | EXF81018.1                        |
| mannan endo-1,4-beta-mannosidase                     | 401  | 0         | 95%        | 82.81%     | <i>Plectosphaerella plurivora</i>     | KAH6695781.1                      |
| cytochrome P450                                      | 1076 | 0         | 100%       | 75.19%     | <i>Colletotrichum fiorinae PJ7</i>    | EXF83899.1                        |
| polyketide synthase                                  | 2450 | 0         | 99%        | 67.20%     | <i>Penicillium arizonense</i>         | XP_022486633.1                    |
| hypothetical protein PENARI_c014G04062               | 651  | 1.00E-180 | 50%        | 72.21%     | <i>Penicillium arizonense</i>         | XP_022486531.1                    |
| Cytochrome P450 4V2                                  | 541  | 0         | 94%        | 65.59%     | <i>Penicillium arizonense</i>         | XP_022486670.1                    |
| BCL5p                                                | 527  | 2.00E-171 | 96%        | 53.35%     | <i>Akanthomyces lecanii RCEF 1005</i> | OAA79799.1                        |
| hypothetical protein FALBO_6676                      | 100  | 3.00E-20  | 93%        | 51.61%     | <i>Fusarium albosuccineum</i>         | KAF4466462.1                      |
| NMRAL1 protein                                       | 317  | 0         | 100%       | 80.13%     | <i>Plectosphaerella plurivora</i>     | KAH6661474.1                      |

|                                                         |      |           |      |        |                                     |                |
|---------------------------------------------------------|------|-----------|------|--------|-------------------------------------|----------------|
| hypothetical protein B0J13DRAFT_486524                  | 254  | 4.00E-135 | 100% | 74.41% | <i>Dactylonectria estremocensis</i> | KAH7119443.1   |
| NAD-binding Rossmann fold oxidoreductase family protein | 346  | 0         | 99%  | 73.55% | <i>Talaromyces rugulosus</i>        | XP_035348268.1 |
| hypothetical protein EDB80DRAFT_562441                  | 1169 | 0         | 59%  | 52.66% | <i>Ilyonectria destructans</i>      | KAH7018764.1   |

**59) *Verticillium klebahnii* contig\_ NMXL01000010, PKS-III cluster**

| Gene name                                                         | Size | E value   | % Coverage | % identity | Top blast hit                                 | Accession number of top blast hit |
|-------------------------------------------------------------------|------|-----------|------------|------------|-----------------------------------------------|-----------------------------------|
| NADH-ubiquinone oxidoreductase 30.4 kDa subunit                   | 412  | 1.00E-51  | 81%        | 50.76%     | <i>Plectosphaerella plurivora</i>             | KAH6681192.1                      |
| short chain dehydrogenase                                         | 301  | 3.00E-167 | 96%        | 77.32%     | <i>Sodiomyces alkalinus F11</i>               | XP_028470310.1                    |
| centrin-3                                                         | 189  | 2.00E-88  | 98%        | 68.09%     | <i>Sodiomyces alkalinus F11</i>               | XP_028470317.1                    |
| Iron-sulfur protein IND1                                          | 296  | 7.00E-177 | 99%        | 79.59%     | <i>Colletotrichum truncatum</i>               | XP_036586173.1                    |
| Splicing factor spf30                                             | 304  | 1.00E-109 | 99%        | 69.16%     | <i>Colletotrichum truncatum</i>               | XP_036586172.1                    |
| hypothetical protein B0T11DRAFT_249550                            | 636  | 2.00E-173 | 96%        | 60.67%     | <i>Plectosphaerella cucumerina</i>            | KAH7375296.1                      |
| putative mitochondrial 2-oxoglutarate/malate carrier protein      | 335  | 0         | 100%       | 86.57%     | <i>Colletotrichum chlorophyti</i>             | OLN95994.1                        |
| hypothetical protein BN1708_004965                                | 609  | 0         | 89%        | 70.00%     | <i>Verticillium longisporum</i>               | CRK29490.1                        |
| PAB-dependent poly(A)-specific ribonuclease subunit PAN2          | 1082 | 0         | 98%        | 79.13%     | <i>Plectosphaerella cucumerina</i>            | KAH7375292.1                      |
| fructose-bisphosphate aldolase                                    | 362  | 0         | 100%       | 90.88%     | <i>Plectosphaerella cucumerina</i>            | KAH7375300.1                      |
| putative chalcone and stilbene synthase domain-containing protein | 444  | 0         | 100%       | 75.28%     | <i>Colletotrichum sublineola</i>              | KDN65911.1                        |
| hypothetical protein K456DRAFT_1765144                            | 127  | 3.00E-23  | 86%        | 58.93%     | <i>Colletotrichum gloeosporioides 23</i>      | KAH9228351.1                      |
| TRAUB domain-containing protein                                   | 596  | 3.00E-131 | 78%        | 74.17%     | <i>Plectosphaerella cucumerina</i>            | KAH7375290.1                      |
| transcriptional activator protein acu-15                          | 709  | 0         | 98%        | 73.83%     | <i>Colletotrichum spaethianum</i>             | GJC81216.1                        |
| Feruloyl esterase B                                               | 294  | 3.00E-151 | 92%        | 75.37%     | <i>Colletotrichum orbiculare MAFF 240422</i>  | TDZ25527.1                        |
| oxidoreductase                                                    | 452  | 0         | 99%        | 65.11%     | <i>Plectosphaerella plurivora</i>             | KAH6681205.1                      |
| Acetyltransferase                                                 | 270  | 1.00E-149 | 88%        | 83.61%     | <i>Colletotrichum higginsianum IMI 349063</i> | XP_018159255.1                    |
| carbonic anhydrase                                                | 271  | 2.00E-146 | 93%        | 76.77%     | <i>Colletotrichum incanum</i>                 | KZL87566.1                        |
| Six-hairpin glycosidase-like protein                              | 892  | 0         | 91%        | 69.76%     | <i>Plectosphaerella cucumerina</i>            | KAH7353461.1                      |
| putative MFS hexose transporter                                   | 540  | 0         | 99%        | 83.64%     | <i>Plectosphaerella cucumerina</i>            | KAH7353460.1                      |

**60) *Verticillium klebahnii* contig\_ NMXL01000010, VRPKS-I-26 cluster**

| Gene name                                                                                                                                   | Size | E value   | % Coverage | % identity | Top blast hit                                 | Accession number of top blast hit |
|---------------------------------------------------------------------------------------------------------------------------------------------|------|-----------|------------|------------|-----------------------------------------------|-----------------------------------|
| hypothetical protein SODALDRAFT_319240                                                                                                      | 134  | 4.00E-25  | 95%        | 39.39%     | <i>Sodiomyces alkalinus F11</i>               | XP_028470409.1                    |
| alpha-l-rhamnosidase                                                                                                                        | 1219 | 0         | 71%        | 68.12%     | <i>Colletotrichum truncatum</i>               | XP_036586343.1                    |
| FAD-dependent monooxygenase                                                                                                                 | 453  | 0         | 100%       | 85.65%     | <i>Stachybotrys elegans</i>                   | KAH7303249.1                      |
| heterokaryon incompatibility protein-domain-containing protein                                                                              | 741  | 0         | 100%       | 75.40%     | <i>Chaetomium sp. MPI-CAGE-AT-0009</i>        | KAH6847694.1                      |
| retinol dehydrogenase                                                                                                                       | 312  | 0         | 100%       | 78.53%     | <i>Plectosphaerella plurivora</i>             | KAH6675343.1                      |
| TTL domain-containing protein                                                                                                               | 473  | 0         | 100%       | 73.24%     | <i>Coniochaeta sp. 2T2.1</i>                  | KAB5518934.1                      |
| RecName: Full=Highly reducing polyketide synthase apmlA; Short=HRPKS apmlA; AltName: Full=Phaeospelide A biosynthesis cluster protein apmlA | 2349 | 0         | 99%        | 49.55%     | <i>Apiospora sphaerosperma</i>                | P0CU84.1                          |
| uncharacterized protein KVR01_004169                                                                                                        | 257  | 7.00E-06  | 22%        | 45.61%     | <i>Diaporthe batatas</i>                      | XP_044646333.1                    |
| hypothetical protein B0T11DRAFT_318355                                                                                                      | 163  | 4.00E-55  | 98%        | 65.85%     | <i>Plectosphaerella cucumerina</i>            | KAH7362742.1                      |
| Retinoic acid induced 16-like protein-domain-containing protein                                                                             | 1004 | 0         | 100%       | 72.63%     | <i>Plectosphaerella cucumerina</i>            | KAH7362743.1                      |
| putative pectate lyase F                                                                                                                    | 236  | 6.00E-141 | 97%        | 84.42%     | <i>Colletotrichum fructicola</i>              | XP_031890093.1                    |
| hypothetical protein PFICI_10960                                                                                                            | 1230 | 0         | 83%        | 51.88%     | <i>Pestalotiopsis fici W106-1</i>             | XP_007837732.1                    |
| hypothetical protein                                                                                                                        | 578  | 0         | 96%        | 88.51%     | <i>Colletotrichum higginsianum IMI 349063</i> | XP_018157666.1                    |
| peptidase family C25-domain-containing protein                                                                                              | 1019 | 0         | 99%        | 56.89%     | <i>Paraphoma chrysanthemicola</i>             | KAH7091334.1                      |

**61) *Verticillium klebahnii* contig\_ NMXL01000019, VRPKS-I-14 cluster**

| Gene name                                               | Size | E value   | % Coverage | % identity | Top blast hit                      | Accession number of top blast hit |
|---------------------------------------------------------|------|-----------|------------|------------|------------------------------------|-----------------------------------|
| hypothetical protein F5883DRAFT_436293                  | 1518 | 0         | 96%        | 79.66%     | <i>Diaporthaceae sp. PMI_573</i>   | KAH8748597.1                      |
| hypothetical protein FALBO_210                          | 144  | 5.00E-63  | 85%        | 77.24%     | <i>Fusarium albosuccineum</i>      | KAF4472888.1                      |
| hypothetical protein HYQ45_016732                       | 88   | 2.00E-04  | 100%       | 71.43%     | <i>Verticillium longisporum</i>    | KAG7113540.1                      |
| FK506-binding protein                                   | 212  | 1.00E-82  | 100%       | 67.14%     | <i>Plectosphaerella cucumerina</i> | KAH7367672.1                      |
| Protein rds1 like protein                               | 465  | 0         | 98%        | 79.26%     | <i>Sodiomyces alkalinus F11</i>    | XP_028471380.1                    |
| Vanillyl-alcohol oxidase                                | 562  | 0         | 99%        | 86.58%     | <i>Plectosphaerella plurivora</i>  | KAH6673908.1                      |
| hypothetical protein B0T11DRAFT_56928                   | 204  | 2.00E-98  | 100%       | 71.50%     | <i>Plectosphaerella cucumerina</i> | KAH7367670.1                      |
| NAD(P)-binding protein                                  | 266  | 2.00E-85  | 82%        | 58.45%     | <i>Cenococcum geophilum 1.58</i>   | OCK87093.1                        |
| hypothetical protein CEP52_003390                       | 374  | 5.00E-158 | 97%        | 69.86%     | <i>Fusarium sp. AF-4</i>           | RSM10820.1                        |
| cytochrome P450                                         | 506  | 0         | 100%       | 79.05%     | <i>Plectosphaerella cucumerina</i> | KAH7367666.1                      |
| major facilitator superfamily domain-containing protein | 595  | 0         | 82%        | 61.62%     | <i>Truncatella angustata</i>       | XP_045957260.1                    |

|                                                      |      |           |      |        |                                |                |
|------------------------------------------------------|------|-----------|------|--------|--------------------------------|----------------|
| putative polyketide synthase                         | 3116 | 0         | 100% | 57.03% | <i>Truncatella angustata</i>   | KAH8198320.1   |
| fatty acid desaturase domain-containing protein      | 608  | 0         | 100% | 63.58% | <i>Sarocladium implicatum</i>  | KAH8177350.1   |
| Acyl-CoA dehydrogenase/oxidase                       | 130  | 2.00E-37  | 88%  | 56.52% | <i>Fusarium sp. DS 682</i>     | KAF9769306.1   |
| Acyl-CoA dehydrogenase/oxidase                       | 442  | 3.00E-128 | 91%  | 51.98% | <i>Cordyceps javanica</i>      | TQV95615.1     |
| hypothetical protein F5X99DRAFT_371098               | 612  | 6.00E-131 | 94%  | 41.67% | <i>Biscogniauxia marginata</i> | KAI1504825.1   |
| cytochrome P450 CYP4/CYP19/CYP26 subfamilies protein | 519  | 0         | 95%  | 77.98% | <i>Colletotrichum karsti</i>   | XP_038744559.1 |
| hypothetical protein F4819DRAFT_459179               | 866  | 3.00E-105 | 91%  | 33.26% | <i>Hypoxylon fuscum</i>        | KAI1401228.1   |

## 62) *Verticillium klebahnii* contig\_ NMXL01000013, VRPKS-I-21 cluster

| Gene name                                              | Size | E value   | % Coverage | % identity | Top blast hit                            | Accession number of top blast hit |
|--------------------------------------------------------|------|-----------|------------|------------|------------------------------------------|-----------------------------------|
| hypothetical protein ColTof4_01230                     | 279  | 2.00E-85  | 97%        | 58.97%     | <i>Colletotrichum tofieldiae</i>         | GKT68807.1                        |
| reverse transcriptase                                  | 771  | 0         | 99%        | 87.13%     | <i>Purpureocillium lilacinum</i>         | XP_018173011.1                    |
| reverse transcriptase                                  | 436  | 0         | 89%        | 82.35%     | <i>Purpureocillium lilacinum</i>         | XP_018173011.1                    |
| hypothetical protein ACRE_090730                       | 1474 | 2.00E-112 | 49%        | 38.69%     | <i>Acremonium chrysogenum ATCC 11550</i> | KFH40265.1                        |
| polyketide synthase                                    | 2351 | 0         | 92%        | 69.20%     | <i>Colletotrichum plurivorum</i>         | KAF6826616.1                      |
| predicted protein                                      | 105  | 8.00E-19  | 67%        | 58.90%     | <i>Verticillium alfalfae VaMs.102</i>    | XP_002999652.1                    |
| Zinc-type alcohol dehydrogenase-like protein C16A3.02c | 110  | 4.00E-18  | 99%        | 40.17%     | <i>Verticillium dahliae VDG2</i>         | KAF3351609.1                      |
| hypothetical protein B0J13DRAFT_566569                 | 295  | 2.00E-38  | 40%        | 50.83%     | <i>Dactylonectria estremocensis</i>      | KAH7123403.1                      |
| hypothetical protein GQ607_002381                      | 167  | 4.00E-19  | 95%        | 36.93%     | <i>Colletotrichum asianum</i>            | KAF0330502.1                      |
| Poly(ADP-ribose) polymerase, catalytic domain protein  | 391  | 9.00E-09  | 23%        | 36.96%     | <i>Pseudogymnoascus sp. VKM F-3808</i>   | KFX93482.1                        |

## 63) *Verticillium klebahnii* contig\_ NMXL01000003, VRPKS-I-12 and VNRPKS-I-1 clusters

| Gene name                                   | Size | E value   | % Coverage | % identity | Top blast hit                      | Accession number of top blast hit |
|---------------------------------------------|------|-----------|------------|------------|------------------------------------|-----------------------------------|
| hypothetical protein FPOAC1_009761          | 238  | 2.00E-81  | 89%        | 59.26%     | <i>Fusarium poae</i>               | XP_044706852.1                    |
| cytochrome P450                             | 477  | 0         | 95%        | 75.55%     | <i>Sodiomyces alkalinus F11</i>    | XP_028469280.1                    |
| beta-ketoacyl synthase                      | 366  | 9.00E-89  | 99%        | 46.51%     | <i>Thelonectria olida</i>          | KAH6899712.1                      |
| eukaryotic aspartyl protease                | 454  | 3.00E-175 | 96%        | 53.65%     | <i>Colletotrichum simmondsii</i>   | KXH41725.1                        |
| putative monooxygenase                      | 419  | 0         | 93%        | 72.11%     | <i>Sodiomyces alkalinus F11</i>    | XP_028469276.1                    |
| protein kinase subdomain-containing protein | 890  | 0         | 86%        | 70.91%     | <i>Sodiomyces alkalinus F11</i>    | XP_028469275.1                    |
| polyketide synthase                         | 3943 | 0         | 97%        | 75.14%     | <i>Sodiomyces alkalinus F11</i>    | XP_028469272.1                    |
| pyridoxal-dependent decarboxylase           | 514  | 0         | 88%        | 67.32%     | <i>Plectosphaerella cucumerina</i> | KAH7358159.1                      |

|                                                         |      |           |      |        |                                    |                |
|---------------------------------------------------------|------|-----------|------|--------|------------------------------------|----------------|
| duf92 domain protein                                    | 391  | 8.00E-132 | 99%  | 62.63% | <i>Sodiomyces alkalinus F11</i>    | XP_028469270.1 |
| uncharacterized protein CTRU02_08118                    | 316  | 0.005     | 50%  | 26.47% | <i>Colletotrichum truncatum</i>    | XP_036582041.1 |
| laccase-like multicopper oxidase                        | 561  | 0         | 98%  | 67.88% | <i>Plectosphaerella cucumerina</i> | KAH7358155.1   |
| Conidial pigment polyketide synthase PfmaE like protein | 2188 | 0         | 100% | 79.23% | <i>Colletotrichum karsti</i>       | XP_038751444.1 |
| oxidoreductase                                          | 325  | 0         | 99%  | 84.57% | <i>Colletotrichum truncatum</i>    | XP_036586400.1 |
| transcription factor                                    | 424  | 3.00E-148 | 100% | 56.88% | <i>Colletotrichum incanum</i>      | KZL86702.1     |
| transcription factor Cmr1                               | 926  | 0         | 98%  | 73.07% | <i>Colletotrichum musicola</i>     | KAF6845250.1   |
| glycosyl transferase family protein                     | 325  | 9.00E-164 | 100% | 77.91% | <i>Plectosphaerella cucumerina</i> | KAH7358014.1   |
| dihydrodipicolinate synthase                            | 331  | 0         | 98%  | 81.90% | <i>Plectosphaerella cucumerina</i> | KAH7358015.1   |

**64) *Verticillium klebahnii* contig\_ NMXL01000011, VRPKS-I-9 cluster**

| Gene name                                               | Size | E value   | % Coverage | % identity | Top blast hit                           | Accession number of top blast hit |
|---------------------------------------------------------|------|-----------|------------|------------|-----------------------------------------|-----------------------------------|
| FAD dependent oxidoreductase                            | 334  | 0         | 95%        | 77.36%     | <i>Plectosphaerella cucumerina</i>      | KAH7368673.1                      |
| major facilitator superfamily domain-containing protein | 517  | 0         | 86%        | 85.08%     | <i>Plectosphaerella cucumerina</i>      | KAH7368674.1                      |
| uncharacterized protein B0I36DRAFT_355828               | 178  | 8.00E-11  | 37%        | 78.79%     | <i>Microdochium trichocladiopsis</i>    | XP_046005612.1                    |
| putative amidase                                        | 558  | 0         | 99%        | 78.82%     | <i>Plectosphaerella plurivora</i>       | KAH6684967.1                      |
| lovastatin nonaketide synthase                          | 4064 | 0         | 99%        | 72.49%     | <i>Hirsutella rhossiliensis</i>         | XP_044717051.1                    |
| hypothetical protein B0T11DRAFT_345058                  | 549  | 5.00E-38  | 61%        | 32.69%     | <i>Plectosphaerella cucumerina</i>      | KAH7375153.1                      |
| lipase                                                  | 560  | 0         | 96%        | 69.33%     | <i>Plectosphaerella cucumerina</i>      | KAH7376670.1                      |
| polysaccharide deacetylase                              | 518  | 3.00E-156 | 69%        | 78.33%     | <i>Plectosphaerella cucumerina</i>      | KAH7374645.1                      |
| hypothetical protein B0T11DRAFT_318679                  | 275  | 8.00E-135 | 98%        | 67.52%     | <i>Plectosphaerella cucumerina</i>      | KAH7363183.1                      |
| predicted protein                                       | 275  | 3.00E-07  | 38%        | 36.45%     | <i>Verticillium alfalfae</i> VaMs.102   | XP_003001333.1                    |
| hypothetical protein ISF_06027                          | 85   | 8.00E-22  | 75%        | 57.81%     | <i>Cordyceps fumosorosea</i> ARSEF 2679 | XP_018703129.1                    |
| tetratricopeptide repeat protein 1                      | 285  | 6.00E-109 | 89%        | 79.22%     | <i>Colletotrichum karsti</i>            | XP_038750970.1                    |
| HAD-like protein                                        | 270  | 4.00E-141 | 99%        | 71.17%     | <i>Thozetella sp. PMI_491</i>           | KAH8895695.1                      |
| C6 zinc finger domain-containing protein                | 518  | 0         | 99%        | 74.63%     | <i>Colletotrichum karsti</i>            | XP_038750968.1                    |

**65) *Verticillium klebahnii* contig\_ NMXL01000020, VRPKS-I-2 cluster**

| Gene name | Size | E value | % Coverage | % identity | Top blast hit | Accession number of top blast hit |
|-----------|------|---------|------------|------------|---------------|-----------------------------------|
|-----------|------|---------|------------|------------|---------------|-----------------------------------|



|                                                 |      |           |      |        |                                          |                |
|-------------------------------------------------|------|-----------|------|--------|------------------------------------------|----------------|
| Fusaric acid cluster transcription factor FUB10 | 425  | 1.00E-158 | 100% | 72.64% | <i>Colletotrichum fructicola</i>         | KAF4886529.1   |
| Alcohol dehydrogenase superfamily, zinc-type    | 353  | 0         | 100% | 90.65% | <i>Colletotrichum fructicola</i>         | XP_031875992.1 |
| putative polyketide synthase                    | 3935 | 0         | 99%  | 86.73% | <i>Colletotrichum fructicola</i>         | KAF4886526.1   |
| Alpha/beta hydrolase                            | 433  | 0         | 99%  | 85.61% | <i>Colletotrichum fructicola</i>         | XP_031875995.1 |
| MFS general substrate transporter-like protein  | 580  | 0         | 100% | 85.69% | <i>Colletotrichum fructicola</i>         | KAF4886521.1   |
| uncharacterized protein CGMCC3_g17405           | 193  | 8.00E-123 | 100% | 86.53% | <i>Colletotrichum fructicola</i>         | XP_031875990.1 |
| D-isomer specific 2-hydroxyacid dehydrogenase   | 326  | 0         | 99%  | 78.29% | <i>Plectosphaerella plurivora</i>        | KAH6689062.1   |
| putative transcriptional regulatory protein     | 466  | 4.00E-111 | 99%  | 50.24% | <i>Plectosphaerella plurivora</i>        | KAH6689063.1   |
| SMR domain-containing protein                   | 730  | 0         | 100% | 84.04% | <i>Colletotrichum graminicola M1.001</i> | XP_008090428.1 |

**66) *Verticillium klebahnii* contig\_ NMXL01000008, VRPKS-I-5 cluster**

| Gene name                                               | Size | E value   | % Coverage | % identity | Top blast hit                                   | Accession number of top blast hit |
|---------------------------------------------------------|------|-----------|------------|------------|-------------------------------------------------|-----------------------------------|
| pseudouridine synthase                                  | 599  | 0         | 97%        | 52.15%     | <i>Sodiomyces alkalinus F11</i>                 | XP_028471325.1                    |
| GPI-GlcNAc transferase complex                          | 222  | 1.00E-45  | 99%        | 61.06%     | <i>Colletotrichum graminicola M1.001</i>        | XP_008094050.1                    |
| hypothetical protein SODALDRAFT_41197                   | 1664 | 0         | 98%        | 73.48%     | <i>Sodiomyces alkalinus F11</i>                 | XP_028471323.1                    |
| glutathione S-transferase                               | 224  | 1.00E-123 | 99%        | 78.03%     | <i>fungus sp. No.14919</i>                      | GAW23379.1                        |
| MFS general substrate transporter                       | 433  | 7.00E-130 | 96%        | 66.11%     | <i>Glarea lozoyensis ATCC 20868</i>             | XP_008088685.1                    |
| major facilitator superfamily-domain-containing protein | 612  | 0         | 88%        | 73.43%     | <i>Biscogniauxia mediterranea</i>               | KAI1639146.1                      |
| hypothetical protein BGAL_0184g00240                    | 256  | 4.00E-75  | 86%        | 53.81%     | <i>Botrytis galanthina</i>                      | THV49682.1                        |
| hypothetical protein B0I37DRAFT_378309                  | 506  | 4.00E-71  | 62%        | 57.67%     | <i>Chaetomium sp. MPI-CAGE-AT-0009</i>          | KAH6844803.1                      |
| lovastatin nonaketide synthase protein                  | 3912 | 0         | 99%        | 64.69%     | <i>Biscogniauxia mediterranea</i>               | KAI1485991.1                      |
| DUF636 domain-containing protein                        | 137  | 9.00E-69  | 100%       | 85.40%     | <i>Purpureocillium lilacinum</i>                | XP_018184317.1                    |
| hypothetical protein B0T11DRAFT_333834                  | 160  | 7.00E-32  | 63%        | 64.71%     | <i>Plectosphaerella cucumerina</i>              | KAH7347765.1                      |
| Isochorismatase-like protein                            | 244  | 6.00E-126 | 90%        | 76.13%     | <i>Plectosphaerella plurivora</i>               | KAH6676014.1                      |
| hypothetical protein jhhlp_008516                       | 905  | 0         | 89%        | 74.57%     | <i>Lomentospora prolificans</i>                 | PKS05149.1                        |
| putative transporter                                    | 111  | 4.00E-52  | 100%       | 79.82%     | <i>Tolypocladium ophioglossoides CBS 100239</i> | KND87833.1                        |

**67) *Verticillium klebahnii* contig\_ NMXL01000002, VRPKS-I-6 cluster**

| Gene name                                                   | Size | E value   | % Coverage | % identity | Top blast hit                      | Accession number of top blast hit |
|-------------------------------------------------------------|------|-----------|------------|------------|------------------------------------|-----------------------------------|
| COX17 protein                                               | 71   | 4.00E-21  | 70%        | 82.00%     | <i>Diaporthaceae sp. PMI_573</i>   | KAH8788412.1                      |
| hypothetical protein HYQ45_010318                           | 159  | 6.00E-46  | 78%        | 64.80%     | <i>Verticillium longisporum</i>    | KAG7131019.1                      |
| protein PXR1                                                | 364  | 4.00E-72  | 48%        | 83.33%     | <i>Plectosphaerella cucumerina</i> | KAH7368324.1                      |
| MFS sugar transporter                                       | 477  | 0         | 97%        | 67.34%     | <i>Colletotrichum sojae</i>        | KAF6797496.1                      |
| hypothetical protein CSPAE12_03025                          | 640  | 2.00E-129 | 80%        | 48.56%     | <i>Colletotrichum incanum</i>      | OHW98243.1                        |
| hypothetical protein C8035_v000460                          | 325  | 2.00E-130 | 97%        | 63.47%     | <i>Colletotrichum spinosum</i>     | TDZ12713.1                        |
| hypothetical protein B0T10DRAFT_76705                       | 277  | 3.00E-51  | 77%        | 47.26%     | <i>Thelonectria olida</i>          | KAH6887013.1                      |
| Transaldolase                                               | 365  | 0         | 100%       | 86.61%     | <i>Colletotrichum siamense</i>     | KAF4850344.1                      |
| membrane transporter D1                                     | 599  | 0         | 99%        | 82.24%     | <i>Ilyonectria destructans</i>     | KAH7006833.1                      |
| thioredoxin                                                 | 328  | 4.00E-173 | 100%       | 74.09%     | <i>Plectosphaerella cucumerina</i> | KAH7368325.1                      |
| alpha beta hydrolase protein                                | 271  | 1.00E-120 | 94%        | 64.20%     | <i>Colletotrichum truncatum</i>    | XP_036575502.1                    |
| serine hydrolase-domain-containing protein                  | 284  | 7.00E-132 | 100%       | 63.38%     | <i>Xylariaceae sp. FL0016</i>      | KAI1344560.1                      |
| Polyketide synthase-nonribosomal peptide synthetase         | 4028 | 0         | 99%        | 66.66%     | <i>Aspergillus burnettii</i>       | KAF5861957.1                      |
| hypothetical protein CC78DRAFT_576631                       | 470  | 0         | 100%       | 65.74%     | <i>Didymosphaeria enalia</i>       | KAF2268082.1                      |
| P-loop containing nucleoside triphosphate hydrolase protein | 1120 | 0         | 98%        | 56.49%     | <i>Clohesyomyces aquaticus</i>     | ORY13587.1                        |
| solid-state culture-specific protein-like protein           | 466  | 0         | 99%        | 63.42%     | <i>Didymosphaeria enalia</i>       | KAF2268085.1                      |
| cytochrome P450                                             | 458  | 0         | 94%        | 67.28%     | <i>Aspergillus alliaceus</i>       | XP_031905229.1                    |
| putative alcohol dehydrogenase                              | 370  | 0         | 100%       | 79.73%     | <i>Xylariaceae sp. FL0016</i>      | KAI1344559.1                      |
| cytochrome P450                                             | 494  | 0         | 95%        | 64.23%     | <i>Aspergillus avenaceus</i>       | KAE8150739.1                      |

**68) *Verticillium longisporum* contig\_ CVQH01005557, VRPKS-I-22 cluster**

| Gene name                                                   | Size | E value   | % Coverage | % identity | Top blast hit                      | Accession number of top blast hit |
|-------------------------------------------------------------|------|-----------|------------|------------|------------------------------------|-----------------------------------|
| phospholipase D1                                            | 1095 | 0         | 100%       | 76.61%     | <i>Plectosphaerella cucumerina</i> | KAH7357821.1                      |
| tubulin gamma chain                                         | 461  | 0         | 100%       | 96.32%     | <i>Plectosphaerella cucumerina</i> | KAH7357822.1                      |
| uncharacterized protein BCR38DRAFT_425087                   | 93   | 5.00E-37  | 94%        | 73.86%     | <i>Pseudomassariella vexata</i>    | XP_040719305.1                    |
| hypothetical protein SODALDRAFT_68083                       | 884  | 2.00E-08  | 14%        | 36.57%     | <i>Sodiomyces alkalinus F11</i>    | XP_028463302.1                    |
| P-loop containing nucleoside triphosphate hydrolase protein | 250  | 3.00E-106 | 100%       | 67.20%     | <i>Plectosphaerella cucumerina</i> | KAH7357817.1                      |

|                                                      |      |           |      |        |                                           |                |
|------------------------------------------------------|------|-----------|------|--------|-------------------------------------------|----------------|
| hypothetical protein FNYG_02927                      | 345  | 5.00E-125 | 97%  | 56.01% | <i>Fusarium nygamai</i>                   | PNP83710.1     |
| major facilitator superfamily transporter            | 169  | 7.00E-77  | 100% | 75.74% | <i>Cytospora leucostoma</i>               | ROW13285.1     |
| hypothetical protein BU23DRAFT_475183                | 419  | 0         | 87%  | 72.19% | <i>Bimuria novae-zelandiae</i> CBS 107.79 | KAF1970089.1   |
| DUF341 domain-containing protein                     | 207  | 2.00E-98  | 100% | 63.76% | <i>Fusarium napiforme</i>                 | KAF5540875.1   |
| UDP-glucosyl transferase family protein              | 553  | 0         | 98%  | 60.88% | <i>Fusarium</i> sp. NRRL 66182            | KAF5020447.1   |
| polyketide synthase                                  | 2632 | 0         | 99%  | 70.23% | <i>Fusarium mexicanum</i>                 | KAF5539484.1   |
| sulfate transporter family-domain-containing protein | 805  | 0         | 99%  | 53.77% | <i>Bisporella</i> sp. PMI_857             | KAH8586595.1   |
| hypothetical protein DL769_010058                    | 281  | 1.00E-119 | 100% | 57.00% | <i>Monosporascus</i> sp. CRB-8-3          | RYP55738.1     |
| hypothetical protein B0T11DRAFT_99011                | 247  | 2.00E-10  | 33%  | 39.02% | <i>Plectosphaerella cucumerina</i>        | KAH7358030.1   |
| hypothetical protein CNYM01_04222                    | 153  | 2.00E-67  | 99%  | 78.29% | <i>Colletotrichum nymphaeae</i> SA-01     | KXH64953.1     |
| hypothetical protein F5X68DRAFT_276198               | 130  | 8.00E-43  | 94%  | 64.23% | <i>Plectosphaerella plurivora</i>         | KAH6686951.1   |
| MSF1 protein                                         | 192  | 1.00E-115 | 98%  | 85.94% | <i>Sodiomyces alkalinus</i> F11           | XP_028463299.1 |
| amine oxidase                                        | 734  | 0         | 90%  | 79.29% | <i>Colletotrichum incanum</i>             | KZL83967.1     |
| cytochrome c oxidase assembly protein CtaG/Cox11     | 238  | 3.00E-133 | 87%  | 86.06% | <i>Colletotrichum scovillei</i>           | XP_035329109.1 |
| 60S ribosomal protein L26-1                          | 136  | 1.00E-67  | 100% | 85.40% | <i>Plectosphaerella cucumerina</i>        | KAH7347842.1   |

**69) *Verticillium longisporum* contig\_ CVQH01020307, VRPKS-I-23 cluster**

| Gene name                                                   | Size | E value   | % Coverage | % identity | Top blast hit                            | Accession number of top blast hit |
|-------------------------------------------------------------|------|-----------|------------|------------|------------------------------------------|-----------------------------------|
| tubulin gamma chain                                         | 461  | 0         | 100%       | 96.32%     | <i>Plectosphaerella cucumerina</i>       | KAH7357822.1                      |
| uncharacterized protein BCR38DRAFT_425087                   | 90   | 5.00E-37  | 97%        | 73.86%     | <i>Pseudomassariella vexata</i>          | XP_040719305.1                    |
| hypothetical protein SODALDRAFT_68083                       | 883  | 4.00E-09  | 13%        | 37.01%     | <i>Sodiomyces alkalinus</i> F11          | XP_028463302.1                    |
| P-loop containing nucleoside triphosphate hydrolase protein | 251  | 2.00E-106 | 100%       | 67.73%     | <i>Plectosphaerella cucumerina</i>       | KAH7357817.1                      |
| hypothetical protein FSARC_10491                            | 332  | 7.00E-127 | 97%        | 54.91%     | <i>Fusarium sarcochroum</i>              | KAF4960431.1                      |
| major facilitator superfamily transporter                   | 594  | 0         | 89%        | 78.11%     | <i>Colletotrichum graminicola</i> M1.001 | XP_008093595.1                    |
| FAD dependent                                               | 324  | 5.00E-123 | 86%        | 57.27%     | <i>Fusarium</i> sp. NRRL 25303           | KAF5635100.1                      |
| DUF341 domain-containing protein                            | 207  | 1.00E-98  | 100%       | 64.22%     | <i>Fusarium napiforme</i>                | KAF5540875.1                      |
| hypothetical protein F66182_7526                            | 552  | 0         | 98%        | 61.13%     | <i>Fusarium</i> sp. NRRL 66182           | KAF5020447.1                      |
| polyketide synthase                                         | 2635 | 0         | 99%        | 70.43%     | <i>Fusarium mexicanum</i>                | KAF5539484.1                      |

|                                                      |      |           |      |        |                                       |                |
|------------------------------------------------------|------|-----------|------|--------|---------------------------------------|----------------|
| sulfate transporter family-domain-containing protein | 767  | 0         | 99%  | 53.27% | <i>Bisporrella sp. PMI_857</i>        | KAH8586595.1   |
| hypothetical protein FPSE5266_02886                  | 339  | 1.00E-18  | 90%  | 24.26% | <i>Fusarium pseudograminearum</i>     | KAF0638536.1   |
| hypothetical protein CNYM01_04222                    | 115  | 6.00E-53  | 95%  | 74.55% | <i>Colletotrichum nymphaeae SA-01</i> | KXH64953.1     |
| hypothetical protein F5X68DRAFT_276198               | 130  | 2.00E-46  | 98%  | 64.84% | <i>Plectosphaerella plurivora</i>     | KAH6686951.1   |
| MSF1 protein                                         | 192  | 5.00E-115 | 91%  | 88.07% | <i>Sodiomyces alkalinus F11</i>       | XP_028463299.1 |
| methionine aminopeptidase 2-like protein             | 441  | 0         | 100% | 84.98% | <i>Plectosphaerella plurivora</i>     | KAH6686947.1   |
| Peroxiredoxin-like 2C                                | 395  | 5.00E-142 | 73%  | 63.87% | <i>Plectosphaerella plurivora</i>     | KAH6686952.1   |
| hypothetical protein IFR05_013588                    | 289  | 1.00E-04  | 59%  | 24.18% | <i>Cadophora sp. M221</i>             | KAG4430930.1   |
| branched-chain-amino-acid aminotransferase           | 476  | 0         | 88%  | 76.18% | <i>Plectosphaerella plurivora</i>     | KAH6686954.1   |
| branched-chain-amino-acid aminotransferase           | 89   | 2.00E-15  | 84%  | 60.76% | <i>Plectosphaerella plurivora</i>     | KAH6686954.1   |
| ethanolamine-phosphate cytidyltransferase            | 447  | 0         | 93%  | 85.44% | <i>Plectosphaerella cucumerina</i>    | KAH7362590.1   |
| hypothetical protein B0T11DRAFT_85792                | 433  | 7.00E-173 | 86%  | 77.04% | <i>Plectosphaerella cucumerina</i>    | KAH7362591.1   |
| WD domain-containing protein                         | 358  | 0         | 100% | 82.68% | <i>Colletotrichum simmondsii</i>      | KXH43027.1     |
| hypothetical protein FHL15_001926                    | 159  | 2.00E-19  | 94%  | 42.48% | <i>Xylaria flabelliformis</i>         | TRX97132.1     |
| Ribokinase-like protein                              | 369  | 1.00E-41  | 99%  | 36.24% | <i>Sodiomyces alkalinus F11</i>       | XP_028463289.1 |
| homoserine kinase                                    | 244  | 3.00E-91  | 96%  | 95.53% | <i>Plectosphaerella cucumerina</i>    | KAH7362595.1   |
| uncharacterized protein VDAG_01851                   | 155  | 9.00E-74  | 100% | 92.26% | <i>Verticillium dahliae VdLs.17</i>   | XP_009656175.1 |
| SnodProt1                                            | 138  | 4.00E-64  | 100% | 68.12% | <i>Plectosphaerella cucumerina</i>    | KAH7368131.1   |
| hypothetical protein B0T11DRAFT_355575               | 258  | 8.00E-13  | 84%  | 35.56% | <i>Plectosphaerella cucumerina</i>    | KAH7358954.1   |
| hypothetical protein F5X68DRAFT_4497                 | 600  | 5.00E-151 | 97%  | 61.12% | <i>Plectosphaerella plurivora</i>     | KAH6697434.1   |
| hypothetical protein SODALDRAFT_82945                | 363  | 4.00E-89  | 100% | 46.84% | <i>Sodiomyces alkalinus F11</i>       | XP_028462491.1 |
| phenolphthiocerol synthesis polyketide synthase ppsA | 2305 | 0         | 98%  | 47.31% | <i>Sodiomyces alkalinus F11</i>       | XP_028462492.1 |
| drug resistance transporter                          | 485  | 0         | 98%  | 69.52% | <i>Plectosphaerella cucumerina</i>    | KAH7358948.1   |
| hypothetical protein BN1723_                         | 578  | 7.00E-90  | 56%  | 51.06% | <i>Plectosphaerella cucumerina</i>    | KAH7358170.1   |
| 2-oxoacid dehydrogenase acyltransferase              | 523  | 0         | 100% | 66.29% | <i>Plectosphaerella cucumerina</i>    | KAH7375969.1   |
| ATP10 protein                                        | 343  | 4.00E-128 | 99%  | 58.52% | <i>Plectosphaerella cucumerina</i>    | KAH7375968.1   |
| vesicle transport V-SNARE protein                    | 232  | 2.00E-129 | 93%  | 80.73% | <i>Plectosphaerella plurivora</i>     | KAH6691283.1   |

**70) *Verticillium longisporum* contig\_ CVQH01023638, VRPKS-I-17 cluster**

| Gene name                                    | Size | E value  | % Coverage | % identity | Top blast hit                                 | Accession number of top blast hit |
|----------------------------------------------|------|----------|------------|------------|-----------------------------------------------|-----------------------------------|
| Lovastatin diketide synthase LovF 16         | 2158 | 0        | 97%        | 69.51%     | <i>Colletotrichum chlorophyti</i>             | OLN86478.1                        |
| uncharacterized protein SMAC_07940           | 114  | 2.00E-61 | 97%        | 83.04%     | <i>Sordaria macrospora k-hell</i>             | XP_003350624.1                    |
| ABC transporter                              | 1601 | 0        | 83%        | 66.96%     | <i>Colletotrichum nymphaeae SA-01</i>         | KXH49589.1                        |
| Actin                                        | 375  | 0        | 100%       | 99.73%     | <i>Tolypocladium paradoxum</i>                | POR36442.1                        |
| hsp70-like protein                           | 209  | 3.00E-94 | 98%        | 67.77%     | <i>Plectosphaerella plurivora</i>             | KAH6686283.1                      |
| 54S ribosomal protein L7                     | 352  | 0        | 99%        | 73.14%     | <i>Sodiomyces alkalinus F11</i>               | XP_028466988.1                    |
| ubiquitin C-terminal hydrolase               | 1066 | 0        | 87%        | 66.80%     | <i>Plectosphaerella cucumerina</i>            | KAH7363099.1                      |
| 6-phosphofructo-2-kinase                     | 341  | 0        | 100%       | 86.46%     | <i>Plectosphaerella plurivora</i>             | KAH6686287.1                      |
| Mitochondrial import receptor subunit tom-40 | 146  | 1.00E-84 | 99%        | 86.30%     | <i>Colletotrichum higginsianum IMI 349063</i> | XP_018160456.1                    |

**71) *Verticillium longisporum* contig\_ CVQH01020607, VRPKS-I-23 cluster**

| Gene name                                            | Size | E value   | % Coverage | % identity | Top blast hit                      | Accession number of top blast hit |
|------------------------------------------------------|------|-----------|------------|------------|------------------------------------|-----------------------------------|
| virulence sensor protein bvgS                        | 234  | 2.00E-112 | 100%       | 72.77%     | <i>Plectosphaerella cucumerina</i> | KAH7358170.1                      |
| drug resistance transporter                          | 524  | 0         | 97%        | 69.40%     | <i>Plectosphaerella cucumerina</i> | KAH7358948.1                      |
| phenolphthiocerol synthesis polyketide synthase ppsA | 2291 | 0         | 99%        | 49.04%     | <i>Sodiomyces alkalinus F11</i>    | XP_028462492.1                    |
| hypothetical protein SODALDRAFT_82945                | 363  | 4.00E-88  | 100%       | 46.84%     | <i>Sodiomyces alkalinus F11</i>    | XP_028462491.1                    |
| hypothetical protein F5X68DRAFT_4497                 | 719  | 0         | 93%        | 63.05%     | <i>Plectosphaerella plurivora</i>  | KAH6697434.1                      |
| hypothetical protein F5X68DRAFT_257601               | 242  | 3.00E-12  | 63%        | 45.11%     | <i>Plectosphaerella plurivora</i>  | KAH6697435.1                      |
| SnodProt1                                            | 138  | 2.00E-65  | 100%       | 70.29%     | <i>Plectosphaerella cucumerina</i> | KAH7368131.1                      |
| homoserine kinase                                    | 501  | 0         | 88%        | 94.22%     | <i>Plectosphaerella cucumerina</i> | KAH7362595.1                      |
| hypothetical protein SODALDRAFT_67746                | 367  | 9.00E-48  | 99%        | 36.10%     | <i>Sodiomyces alkalinus F11</i>    | XP_028463289.1                    |

**72) *Verticillium longisporum* contig\_ CVQH01022527, VRPKS-I-26 cluster**

| Gene name                                | Size | E value   | % Coverage | % identity | Top blast hit                     | Accession number of top blast hit |
|------------------------------------------|------|-----------|------------|------------|-----------------------------------|-----------------------------------|
| hypothetical protein AK830_g141          | 353  | 7.00E-161 | 84%        | 82.55%     | <i>Neonectria ditissima</i>       | KPM46366.1                        |
| short chain dehydrogenase reductase      | 292  | 2.00E-103 | 99%        | 55.33%     | <i>Colletotrichum truncatum</i>   | XP_036579832.1                    |
| regulator-ty1 transposition protein      | 166  | 2.00E-27  | 89%        | 40.94%     | <i>Colletotrichum incanum</i>     | OHW92586.1                        |
| ankyrin repeat-containing domain protein | 778  | 8.00E-122 | 96%        | 35.94%     | <i>Plectosphaerella plurivora</i> | KAH6670890.1                      |

|                                                   |      |           |      |        |                                    |              |
|---------------------------------------------------|------|-----------|------|--------|------------------------------------|--------------|
| hypothetical protein<br>F5X68DRAFT_228683         | 77   | 3.00E-17  | 62%  | 77.55% | <i>Plectosphaerella plurivora</i>  | KAH6692307.1 |
| peptidase family C25-domain-containing<br>protein | 1017 | 0         | 100% | 54.67% | <i>Paraphoma chrysanthemicola</i>  | KAH7091334.1 |
| hypothetical protein CMUS01_12901                 | 577  | 0         | 93%  | 87.15% | <i>Colletotrichum musicola</i>     | KAF6813152.1 |
| hypothetical protein<br>F5X68DRAFT_158933         | 365  | 0         | 98%  | 79.18% | <i>Plectosphaerella plurivora</i>  | KAH6670884.1 |
| choline dehydrogenase                             | 616  | 0         | 97%  | 80.94% | <i>Plectosphaerella cucumerina</i> | KAH7368263.1 |
| hypothetical protein CSUB01_04894                 | 991  | 0         | 100% | 71.51% | <i>Plectosphaerella cucumerina</i> | KAH7362743.1 |
| hypothetical protein<br>B0T11DRAFT_318355         | 162  | 3.00E-57  | 98%  | 66.46% | <i>Plectosphaerella cucumerina</i> | KAH7362742.1 |
| hypothetical protein<br>F5B20DRAFT_586947         | 1201 | 0         | 88%  | 63.21% | <i>Whalleya microplaca</i>         | KAI1073750.1 |
| hypothetical protein<br>F5B20DRAFT_586947         | 342  | 9.00E-111 | 98%  | 55.39% | <i>Whalleya microplaca</i>         | KAI1073750.1 |
| TTL domain-containing protein                     | 470  | 0         | 100% | 69.98% | <i>Coniochaeta sp. 2T2.1</i>       | KAB5518934.1 |
| retinol dehydrogenase                             | 300  | 1.00E-156 | 100% | 73.08% | <i>Plectosphaerella plurivora</i>  | KAH6675343.1 |

**73) *Verticillium longisporum* contig\_CVQH01000225, VRPKS-I-17 cluster**

| Gene name                                          | Size | E value   | % Coverage | % identity | Top blast hit                         | Accession number of top blast hit |
|----------------------------------------------------|------|-----------|------------|------------|---------------------------------------|-----------------------------------|
| Asparagine-rich zinc finger protein AZF1           | 441  | 5.00E-115 | 93%        | 49.53%     | <i>Colletotrichum trifolii</i>        | TDZ74112.1                        |
| Asparagine-rich zinc finger protein AZF1           | 444  | 4.00E-113 | 93%        | 49.19%     | <i>Colletotrichum trifolii</i>        | TDZ74112.1                        |
| Ubiquitin-related modifier 1                       | 79   | 1.00E-29  | 93%        | 70.27%     | <i>Colletotrichum chlorophyti</i>     | OLN84992.1                        |
| elongator protein 2 (WD domain-containing protein) | 330  | 1.00E-110 | 87%        | 61.72%     | <i>Colletotrichum tofieldiae</i>      | KZL71342.1                        |
| Ubiquitin- modifier 1                              | 104  | 9.00E-55  | 99%        | 78.64%     | <i>Claviceps pusilla</i>              | KAG6012378.1                      |
| elongator protein 2 (WD domain-containing protein) | 824  | 0         | 99%        | 66.67%     | <i>Colletotrichum tofieldiae</i>      | KZL71342.1                        |
| Elongator complex protein 2                        | 739  | 5.00E-162 | 47%        | 72.24%     | <i>Colletotrichum chlorophyti</i>     | OLN84991.1                        |
| Elongator complex protein 2 like                   | 143  | 2.00E-37  | 98%        | 61.54%     | <i>Plectosphaerella plurivora</i>     | KAH6686279.1                      |
| hypothetical protein<br>SODALDRAFT_332602          | 114  | 7.00E-44  | 78%        | 76.67%     | <i>Sodomyces alkalinus F11</i>        | XP_028466984.1                    |
| Lovastatin diketide synthase LovF 16               | 2268 | 0         | 99%        | 69.14%     | <i>Colletotrichum chlorophyti</i>     | OLN86478.1                        |
| hypothetical protein                               | 255  | 6.00E-150 | 100%       | 78.12%     | <i>Colletotrichum sojae</i>           | KAF6806434.1                      |
| ABC transporter                                    | 1319 | 0         | 98%        | 68.73%     | <i>Colletotrichum nymphaeae SA-01</i> | KXH49589.1                        |
| peptidyl-tRNA hydrolase domain-containing protein  | 194  | 3.00E-44  | 71%        | 69.57%     | <i>Pyricularia oryzae 70-15</i>       | XP_003719872.1                    |

|                                  |     |          |      |        |                                    |                |
|----------------------------------|-----|----------|------|--------|------------------------------------|----------------|
| Actin                            | 375 | 0        | 100% | 99.47% | <i>Tolypocladium paradoxum</i>     | POR36442.1     |
| hsp70-like protein               | 209 | 6.00E-94 | 98%  | 67.77% | <i>Plectosphaerella plurivora</i>  | KAH6686283.1   |
| 54S ribosomal protein L7         | 352 | 0        | 99%  | 73.14% | <i>Sodiomyces alkalinus F11</i>    | XP_028466988.1 |
| ubiquitin C-terminal hydrolase   | 624 | 0        | 100% | 62.88% | <i>Plectosphaerella cucumerina</i> | KAH7363099.1   |
| 6-phosphofructo-2-kinase         | 572 | 0        | 100% | 84.83% | <i>Plectosphaerella cucumerina</i> | KAH7363100.1   |
| duf410 domain-containing protein | 194 | 1.00E-65 | 69%  | 81.48% | <i>Colletotrichum sojae</i>        | KAF6819727.1   |

**74) *Verticillium longisporum* contig\_ CVQH01002447, VRPKS-I-19 cluster**

| Gene name                                          | Size | E value   | % Coverage | % identity | Top blast hit                            | Accession number of top blast hit |
|----------------------------------------------------|------|-----------|------------|------------|------------------------------------------|-----------------------------------|
| Type I Iterative PKS                               | 1896 | 0         | 100%       | 77.60%     | <i>Leptosphaeria biglobosa</i>           | KAH9873394.1                      |
| hypothetical protein J1614_005793                  | 289  | 2.00E-117 | 90%        | 64.12%     | <i>Leptosphaeria biglobosa</i>           | KAH9873395.1                      |
| L-threonate dehydrogenase like protei              | 1132 | 0         | 99%        | 72.76%     | <i>Colletotrichum scovillei</i>          | XP_035328982.1                    |
| hypothetical protein F5X68DRAFT_50483              | 621  | 0         | 100%       | 67.62%     | <i>Plectosphaerella plurivora</i>        | KAH6669659.1                      |
| MFS transporter prIL like protein                  | 488  | 0         | 99%        | 75.61%     | <i>Colletotrichum chlorophyti</i>        | OLN87319.1                        |
| hypothetical protein HYQ44_014562                  | 188  | 8.00E-83  | 92%        | 83.91%     | <i>Verticillium longisporum</i>          | KAG7105862.1                      |
| cytochrome P450                                    | 540  | 2.00E-122 | 96%        | 37.52%     | <i>Ilyonectria sp. MPI-CAGE-AT-0026</i>  | KAH6972830.1                      |
| alpha/beta-hydrolase                               | 350  | 2.00E-113 | 97%        | 54.39%     | <i>Zopfia rhizophila CBS 207.26</i>      | KAF2180147.1                      |
| cutinase-2                                         | 224  | 6.00E-132 | 92%        | 89.37%     | <i>Plectosphaerella cucumerina</i>       | KAH7368196.1                      |
| flavonol synthase-like protein                     | 357  | 0         | 100%       | 71.76%     | <i>Colletotrichum graminicola M1.001</i> | XP_008089570.1                    |
| hypothetical protein                               | 76   | 2.00E-37  | 100%       | 86.84%     | <i>Plectosphaerella plurivora</i>        | KAH6687904.1                      |
| NADH2 dehydrogenase 14K chain                      | 90   | 1.00E-36  | 76%        | 85.51%     | <i>Plectosphaerella cucumerina</i>       | KAH7369386.1                      |
| translation initiation factor eIF-2B subunit delta | 471  | 0         | 68%        | 75.93%     | <i>Plectosphaerella cucumerina</i>       | KAH7369385.1                      |

**75) *Verticillium longisporum* contig\_ CVQH01000001, VRPKS-I-19 cluster**

| Gene name                                     | Size | E value   | % Coverage | % identity | Top blast hit                       | Accession number of top blast hit |
|-----------------------------------------------|------|-----------|------------|------------|-------------------------------------|-----------------------------------|
| Acetylxytan esterase 2                        | 283  | 6.00E-90  | 83%        | 58.92%     | <i>Colletotrichum siamense</i>      | KAF4811263.1                      |
| hypothetical protein VdG1_08811               | 633  | 2.00E-14  | 25%        | 100.00%    | <i>Verticillium dahliae VDG1</i>    | KAF3352645.1                      |
| vacuolar protein sorting-associated protein   | 770  | 0.00E+00  | 98%        | 71.80%     | <i>Plectosphaerella plurivora</i>   | KAH6662429.1                      |
| cutinase-2                                    | 224  | 3.00E-132 | 92%        | 89.37%     | <i>Plectosphaerella cucumerina</i>  | KAH7368196.1                      |
| alpha/beta-hydrolase                          | 249  | 6.00E-73  | 97%        | 52.67%     | <i>Zopfia rhizophila CBS 207.26</i> | KAF2180147.1                      |
| hypothetical protein HYQ44_014562             | 197  | 7.00E-140 | 100%       | 100.00%    | <i>Verticillium longisporum</i>     | KAG7105862.1                      |
| putative transporter C1683.12-like protein 11 | 488  | 0         | 99%        | 76.39%     | <i>Colletotrichum chlorophyti</i>   | OLN87319.1                        |

|                                                                 |      |           |      |        |                                          |                |
|-----------------------------------------------------------------|------|-----------|------|--------|------------------------------------------|----------------|
| Fungal specific transcription factor, putative                  | 639  | 0         | 100% | 66.10% | <i>Plectosphaerella plurivora</i>        | KAH6669659.1   |
| L-threonate dehydrogenase like protein                          | 1134 | 0         | 99%  | 72.55% | <i>Colletotrichum graminicola M1.001</i> | XP_008095607.1 |
| hypothetical protein J1614_005793                               | 289  | 1.00E-116 | 90%  | 64.12% | <i>Leptosphaeria biglobosa</i>           | KAH9873395.1   |
| Type I Iterative PKS                                            | 2291 | 0.00E+00  | 99%  | 78.27% | <i>Leptosphaeria biglobosa</i>           | KAH9873394.1   |
| drug resistance protein                                         | 576  | 0.00E+00  | 97%  | 71.48% | <i>Plectosphaerella cucumerina</i>       | KAH7347641.1   |
| thioredoxin-like protein                                        | 162  | 1.00E-79  | 98%  | 71.88% | <i>Hypoxylon sp. FL0890</i>              | KAI0834638.1   |
| exopolygalacturonase                                            | 470  | 0         | 98%  | 69.44% | <i>Monosporascus sp. mg162</i>           | RYP54678.1     |
| Obg-like ATPase 1                                               | 464  | 0.00E+00  | 90%  | 84.73% | <i>Colletotrichum gloeosporioides</i>    | XP_045260146.1 |
| Type I Iterative PKS                                            | 71   | 9.00E-17  | 97%  | 85.51% | <i>Leptosphaeria biglobosa</i>           | KAH9873394.1   |
| drug resistance protein                                         | 570  | 0.00E+00  | 95%  | 69.82% | <i>Plectosphaerella cucumerina</i>       | KAH7347641.1   |
| exopolygalacturonase                                            | 617  | 0.00E+00  | 74%  | 68.98% | <i>Monosporascus sp. mg162</i>           | RYP54678.1     |
| Obg-like ATPase                                                 | 394  | 0.00E+00  | 100% | 88.58% | <i>Claviceps africana</i>                | KAG5929667.1   |
| DeSI-like protein sdu1                                          | 259  | 9.00E-127 | 97%  | 74.21% | <i>Colletotrichum chlorophyti</i>        | OLN97068.1     |
| putative 37S ribosomal protein S18, mitochondrial               | 248  | 2.00E-91  | 100% | 57.26% | <i>Colletotrichum chlorophyti</i>        | OLN97067.1     |
| TIM44 subunit of mitochondria import inner membrane translocase | 298  | 7.00E-54  | 75%  | 67.69% | <i>Sodiomyces alkalinus F11</i>          | XP_028468965.1 |

**76) *Verticillium longisporum* contig\_ CVQH01024750, VRPKS-I-26 cluster**

| Gene name                                                       | Size | E value   | % Coverage | % identity | Top blast hit                       | Accession number of top blast hit |
|-----------------------------------------------------------------|------|-----------|------------|------------|-------------------------------------|-----------------------------------|
| hypothetical protein SODALDRAFT_326753                          | 68   | 6.00E-18  | 80%        | 70.91%     | <i>Sodiomyces alkalinus F11</i>     | XP_028470403.1                    |
| hypothetical protein GQ607_002185                               | 319  | 1.00E-09  | 30%        | 65.00%     | <i>Colletotrichum asianum</i>       | KAF0330781.1                      |
| peptidase family M28                                            | 373  | 0         | 91%        | 81.34%     | <i>Dactylonectria estremocensis</i> | KAH7144232.1                      |
| retinol dehydrogenase                                           | 312  | 1.00E-169 | 100%       | 76.60%     | <i>Plectosphaerella plurivora</i>   | KAH6675343.1                      |
| TTL domain-containing protein                                   | 470  | 0         | 100%       | 69.98%     | <i>Coniochaeta sp. 2T2.1</i>        | KAB5518934.1                      |
| putative polyketide synthase                                    | 1260 | 0.00%     | 99%        | 63.19%     | <i>Whalleya microplaca</i>          | KAI1073750.1                      |
| hypothetical protein B0T11DRAFT_318355                          | 156  | 5.00E-40  | 98%        | 60.98%     | <i>Plectosphaerella cucumerina</i>  | KAH7362742.1                      |
| Retinoic acid induced 16-like protein-domain-containing protein | 1268 | 0         | 78%        | 71.54%     | <i>Plectosphaerella cucumerina</i>  | KAH7362743.1                      |
| GMC oxidoreductase family protein Mala s like                   | 587  | 0         | 92%        | 84.53%     | <i>Plectosphaerella cucumerina</i>  | KAH7368263.1                      |
| hypothetical protein F5X68DRAFT_158933                          | 365  | 0         | 98%        | 81.37%     | <i>Plectosphaerella plurivora</i>   | KAH6670884.1                      |
| hypothetical protein CMUS01_12901                               | 577  | 0         | 92%        | 87.19%     | <i>Colletotrichum musicola</i>      | KAF6813152.1                      |



|                                                |     |           |      |        |                                   |              |
|------------------------------------------------|-----|-----------|------|--------|-----------------------------------|--------------|
| peptidase family C25-domain-containing protein | 989 | 0         | 100% | 54.44% | <i>Paraphoma chrysanthemicola</i> | KAH7091334.1 |
| hypothetical protein F5X68DRAFT_228683         | 77  | 3.00E-17  | 62%  | 77.55% | <i>Plectosphaerella plurivora</i> | KAH6692307.1 |
| ankyrin repeat-containing domain protein       | 778 | 3.00E-121 | 96%  | 35.84% | <i>Plectosphaerella plurivora</i> | KAH6670890.1 |

**77) *Verticillium longisporum* contig\_ CVQH01024750, VNRPKS-I-1 cluster**

| Gene name                                               | Size | E value   | % Coverage | % identity | Top blast hit                         | Accession number of top blast hit |
|---------------------------------------------------------|------|-----------|------------|------------|---------------------------------------|-----------------------------------|
| oxidoreductase                                          | 326  | 0         | 99%        | 83.69%     | <i>Colletotrichum truncatum</i>       | XP_036586400.1                    |
| Conidial pigment polyketide synthase PfmaE like protein | 2164 | 0         | 100%       | 75.58%     | <i>Colletotrichum karsti</i>          | XP_038751444.1                    |
| laccase-like multicopper oxidase                        | 545  | 0         | 96%        | 64.60%     | <i>Plectosphaerella cucumerina</i>    | KAH7358155.1                      |
| hypothetical protein BN1723_013595                      | 165  | 1.00E-107 | 90%        | 100.00%    | <i>Verticillium longisporum</i>       | CRK25564.1                        |
| hypothetical protein SODALDRAFT_331196                  | 364  | 2.00E-137 | 99%        | 59.34%     | <i>Sodiomyces alkalinus F11</i>       | XP_028469270.1                    |
| L-2,4-diaminobutyrate decarboxylase                     | 479  | 5.00E-173 | 96%        | 60.76%     | <i>Plectosphaerella cucumerina</i>    | KAH7358159.1                      |
| putative kinetochore protein                            | 91   | 8.00E-24  | 100%       | 63.74%     | <i>Phaeoacremonium minimum UCRPA7</i> | XP_007911737.1                    |
| versicolorin reductase                                  | 284  | 1.00E-158 | 100%       | 81.82%     | <i>Plectosphaerella cucumerina</i>    | KAH7358161.1                      |
| complex I intermediate-associated protein               | 483  | 0         | 99%        | 73.81%     | <i>Sodiomyces alkalinus F11</i>       | XP_028469267.1                    |

**78) *Verticillium longisporum* contig\_ CVQH01006668, VNRPKS-I-1 cluster**

| Gene name                                               | Size | E value   | % Coverage | % identity | Top blast hit                      | Accession number of top blast hit |
|---------------------------------------------------------|------|-----------|------------|------------|------------------------------------|-----------------------------------|
| hypothetical protein SODALDRAFT_82466                   | 612  | 4.00E-77  | 86%        | 36.02%     | <i>Sodiomyces alkalinus F11</i>    | XP_028462476.1                    |
| Elongation factor 1-alpha like protein                  | 359  | 0         | 95%        | 93.90%     | <i>Diaporthaceae sp. PMI_573</i>   | KAH8762000.1                      |
| versicolorin reductase                                  | 284  | 6.00E-162 | 100%       | 82.52%     | <i>Plectosphaerella cucumerina</i> | KAH7358161.1                      |
| polyketide synthase                                     | 246  | 2.00E-54  | 67%        | 53.94%     | <i>Sodiomyces alkalinus F11</i>    | XP_028469272.1                    |
| pyridoxal-dependent decarboxylase                       | 474  | 1.00E-163 | 98%        | 58.94%     | <i>Plectosphaerella plurivora</i>  | KAH6697039.1                      |
| hypothetical protein SODALDRAFT_331196                  | 390  | 3.00E-153 | 99%        | 64.86%     | <i>Sodiomyces alkalinus F11</i>    | XP_028469270.1                    |
| hypothetical protein BN1708_002822                      | 223  | 4.00E-149 | 90%        | 99.01%     | <i>Verticillium longisporum</i>    | CRK15632.1                        |
| iron transport multicopper oxidase fetC                 | 565  | 0         | 92%        | 64.94%     | <i>Colletotrichum liriopes</i>     | GKT45119.1                        |
| Conidial pigment polyketide synthase PfmaE like protein | 2189 | 0         | 100%       | 76.49%     | <i>Colletotrichum karsti</i>       | XP_038751444.1                    |

|                                     |     |           |      |        |                                    |                |
|-------------------------------------|-----|-----------|------|--------|------------------------------------|----------------|
| oxidoreductase                      | 326 | 0         | 99%  | 83.38% | <i>Colletotrichum truncatum</i>    | XP_036586400.1 |
| transcription factor                | 286 | 3.00E-53  | 44%  | 71.43% | <i>Colletotrichum higginsianum</i> | CCF47183.1     |
| hypothetical protein DL767_005224   | 729 | 0         | 80%  | 56.09% | <i>Monosporascus sp. MG133</i>     | RYP32460.1     |
| glycosyl transferase family protein | 307 | 9.00E-151 | 100% | 69.94% | <i>Sodiomyces alkalinus</i> F11    | XP_028469283.1 |

**79) *Verticillium longisporum* contig\_ CVQH01006891, VRPKS-I-11 cluster**

| Gene name                                          | Size | E value   | % Coverage | % identity | Top blast hit                            | Accession number of top blast hit |
|----------------------------------------------------|------|-----------|------------|------------|------------------------------------------|-----------------------------------|
| mg2+ transporter                                   | 1009 | 0         | 82%        | 38.82%     | <i>Colletotrichum asianum</i>            | KAF0332070.1                      |
| metallo-beta-lactamase family protein              | 227  | 1.00E-88  | 88%        | 61.23%     | <i>Plectosphaerella cucumerina</i>       | KAH7359326.1                      |
| Aldo/keto reductase                                | 323  | 4.00E-149 | 97%        | 65.08%     | <i>Ilyonectria destructans</i>           | KAH6999345.1                      |
| AMP-binding enzyme domain-containing protein       | 1180 | 0         | 99%        | 77.09%     | <i>Hirsutella rhossiliensis</i>          | XP_044717051.1                    |
| polyamine transporter 1                            | 587  | 0         | 98%        | 74.18%     | <i>Plectosphaerella plurivora</i>        | KAH6687403.1                      |
| lactose permease                                   | 525  | 0         | 95%        | 81.98%     | <i>Fusarium decemcellulare</i>           | KAF4989538.1                      |
| polyketide synthase                                | 2672 | 0         | 80%        | 44.24%     | <i>Acremonium chrysogenum</i> ATCC 11550 | KFH45364.1                        |
| putative polyketide synthase                       | 402  | 0         | 99%        | 70.64%     | <i>Acremonium chrysogenum</i> ATCC 11550 | KFH45364.1                        |
| uncharacterized protein BCR38DRAFT_489105          | 206  | 1.00E-61  | 87%        | 52.72%     | <i>Pseudomassariella vexata</i>          | XP_040711558.1                    |
| short-chain dehydrogenase                          | 288  | 2.00E-99  | 100%       | 64.93%     | <i>Plectosphaerella cucumerina</i>       | KAH7347401.1                      |
| putative efflux pump antibiotic resistance protein | 1071 | 0         | 48%        | 60.42%     | <i>Hypoxylon sp. FL0890</i>              | KAI0837754.1                      |
| kinase domain-containing protein                   | 394  | 0         | 92%        | 78.96%     | <i>Epichloe festucae F11</i>             | QPH06552.1                        |
| hypothetical protein BN1708_011581                 | 68   | 3.00E-26  | 80%        | 100.00%    | <i>Verticillium longisporum</i>          | CRK15839.1                        |
| ankyrin repeat-containing domain protein           | 334  | 9.00E-61  | 66%        | 49.33%     | <i>Plectosphaerella cucumerina</i>       | KAH7375435.1                      |
| short-chain dehydrogenase                          | 250  | 2.00E-111 | 100%       | 63.49%     | <i>Plectosphaerella plurivora</i>        | KAH6692198.1                      |

**80) *Verticillium longisporum* contig\_ CVQH01025950, VRPKS-I-8 cluster**

| Gene name                                                                                          | Size | E value | % Coverage | % identity | Top blast hit                  | Accession number of top blast hit |
|----------------------------------------------------------------------------------------------------|------|---------|------------|------------|--------------------------------|-----------------------------------|
| polyketide synthase                                                                                | 2506 | 0       | 98%        | 69.55%     | <i>Fusarium sp. NRRL 66182</i> | KAF5026352.1                      |
| alcohol dehydrogenase like domain-containing protein                                               | 362  | 0       | 97%        | 79.60%     | <i>Stemphylium lycopersici</i> | KNG48002.1                        |
| Enoyl reductase                                                                                    | 324  | 0       | 99         | 64.15      | <i>Fusarium mexicanum</i>      | RAR12984                          |
| Hydrolase                                                                                          | 256  | 0       | 100        | 85.12      | <i>Stemphylium lycopersici</i> | KNG48003                          |
| Fungal ZN(2) Cys(6) cluster domain containing protein/Fujikurins biosynthesis transcription factor | 359  | 2e-158  | 99         | 57.53      | <i>Stemphylium lycopersici</i> | KNG48004                          |
| MFS gliotoxin efflux transporter                                                                   | 473  | 0       | 99         | 69.57      | <i>Ascochyta lentis</i>        | KAF9701447                        |

|                          |      |        |     |       |                               |            |
|--------------------------|------|--------|-----|-------|-------------------------------|------------|
| Cytochrome monooxygenase | 515  | 0      | 93  | 73.65 | <i>Fusarium sp.</i>           | KAF5026356 |
| Hypothetical protein     | 229  | 3e-123 | 62  | 54.38 | <i>Cadophora malorum</i>      | KAG4414469 |
| Hypothetical protein     | 96   | 2e-65  | 98  | 54.37 | <i>Stylonectria norvegica</i> | KAF7562826 |
| Hypothetical protein     | 240  | 2e-149 | 100 | 39.38 | <i>Stachybotrys chartarum</i> | KEY69576   |
| Dehydrogenase            | 828  | 1e-183 | 84  | 46.63 | <i>Ustilagoidea virens</i>    | QUC21319   |
| Hypothetical protein     | 1314 | 0      | 99  | 44.89 | <i>Fusarium mundagurra</i>    | KAF5705177 |

#### 81) *Verticillium longisporum* contig\_CVQH01027305, VRPKS-I-1 cluster

| Gene name                                               | Size | E value   | % Coverage | % identity | Top blast hit                          | Accession number of top blast hit |
|---------------------------------------------------------|------|-----------|------------|------------|----------------------------------------|-----------------------------------|
| dihydroorotate dehydrogenase                            | 399  | 0         | 100%       | 75.31%     | <i>Sodiomyces alkalinus F11</i>        | XP_028470759.1                    |
| Protein SYM1                                            | 267  | 4.00E-121 | 82%        | 77.68%     | <i>Colletotrichum viniferum</i>        | KAF4911848.1                      |
| hypothetical protein F5X68DRAFT_40851                   | 716  | 3.00E-175 | 95%        | 58.38%     | <i>Plectosphaerella plurivora</i>      | KAH6673933.1                      |
| WW domain-containing oxidoreductase                     | 332  | 1.00E-147 | 100%       | 76.51%     | <i>Colletotrichum sidae</i>            | TEA18735.1                        |
| hypothetical protein IFM61606_09584                     | 154  | 2.00E-64  | 100%       | 70.13%     | <i>Aspergillus udagawae</i>            | GFF25928.1                        |
| integral membrane protein                               | 310  | 3.00E-127 | 96%        | 68.56%     | <i>Plectosphaerella plurivora</i>      | KAH6672729.1                      |
| polyketide synthase                                     | 4107 | 0         | 99%        | 42.69%     | <i>Halenospora varia</i>               | KAH6673321.1                      |
| hypothetical protein V490_02118                         | 467  | 5.00E-115 | 99%        | 44.23%     | <i>Pseudogymnoascus sp. VKM F-3557</i> | KFX98761.1                        |
| hypothetical protein CDV55_104319                       | 361  | 9.00E-99  | 94%        | 49.42%     | <i>Aspergillus turcosus</i>            | RHZ60657.1                        |
| hypothetical protein DBV05_g8002                        | 195  | 2.00E-42  | 96%        | 38.62%     | <i>Lasiodiplodia theobromae</i>        | KAB2573329.1                      |
| hypothetical protein BX600DRAFT_462019                  | 413  | 1.00E-79  | 61%        | 52.55%     | <i>Xylariales sp. PMI_506</i>          | KAH8666574.1                      |
| major facilitator superfamily domain-containing protein | 585  | 0         | 90%        | 67.49%     | <i>Xylariales sp. PMI_506</i>          | KAH8666575.1                      |
| hypothetical protein Forpe1208_v005775                  | 168  | 8.00E-40  | 96%        | 53.09%     | <i>Fusarium oxysporum f. sp. rapae</i> | KAG7415270.1                      |

#### 82) *Verticillium longisporum* contig\_CVQH01027305, VRPKS-I-23 cluster

| Gene name                                | Size | E value   | % Coverage | % identity | Top blast hit                         | Accession number of top blast hit |
|------------------------------------------|------|-----------|------------|------------|---------------------------------------|-----------------------------------|
| hypothetical protein SPI_04859           | 280  | 6.00E-134 | 95%        | 71.27%     | <i>Sporothrix insectorum RCEF 264</i> | OAA62000.1                        |
| benzoate 4-monooxygenase cytochrome P450 | 268  | 3.00E-91  | 97%        | 52.43%     | <i>Colletotrichum higginsianum</i>    | TIC94206.1                        |
| Sterol 3-beta-glucosyltransferase        | 1458 | 0         | 94%        | 70.56%     | <i>Colletotrichum siamense</i>        | XP_036496831.1                    |
| WD repeat-containing protein             | 565  | 0         | 99%        | 72.74%     | <i>Plectosphaerella cucumerina</i>    | KAH7349692.1                      |
| hypothetical protein B0T11DRAFT_289698   | 337  | 2.00E-63  | 94%        | 44.78%     | <i>Plectosphaerella cucumerina</i>    | KAH7349693.1                      |

|                                                      |      |           |      |        |                                       |                |
|------------------------------------------------------|------|-----------|------|--------|---------------------------------------|----------------|
| pectate lyase                                        | 243  | 2.00E-154 | 100% | 92.18% | <i>Plectosphaerella cucumerina</i>    | KAH7359289.1   |
| putative transporter                                 | 533  | 0         | 93%  | 81.53% | <i>Colletotrichum chlorophyti</i>     | OLN93090.1     |
| phenolphthiocerol synthesis polyketide synthase ppsA | 1092 | 0         | 99%  | 47.21% | <i>Sodiomyces alkalinus F11</i>       | XP_028463040.1 |
| hypothetical protein                                 | 772  | 0         | 98%  | 57.50% | <i>Sodiomyces alkalinus F11</i>       | XP_028463042.1 |
| serine 3-dehydrogenase                               | 283  | 1.00E-155 | 98%  | 74.64% | <i>Akanthomyces lecanii RCEF 1005</i> | OAA81050.1     |
| clock controlled protein                             | 413  | 1.00E-150 | 97%  | 65.27% | <i>Colletotrichum tofieldiae</i>      | GKT84128.1     |
| Clock-controlled protein 8                           | 530  | 4.00E-85  | 59%  | 66.80% | <i>Colletotrichum tanacetii</i>       | TKW48619.1     |
| hypothetical protein SODALDRAFT_329702               | 432  | 8.00E-31  | 80%  | 64.19% | <i>Sodiomyces alkalinus F11</i>       | XP_028462398.1 |
| hypothetical protein SODALDRAFT_329702               | 354  | 6.00E-54  | 92%  | 52.25% | <i>Sodiomyces alkalinus F11</i>       | XP_028462398.1 |
| D-isomer specific 2-hydroxyacid dehydrogenase        | 387  | 2.00E-171 | 88%  | 73.41% | <i>Plectosphaerella cucumerina</i>    | KAH7368637.1   |

### 83) *Verticillium longisporum* contig\_CVQH01004113, PKS-III cluster

| Gene name                                                      | Size | E value   | % Coverage | % identity | Top blast hit                      | Accession number of top blast hit |
|----------------------------------------------------------------|------|-----------|------------|------------|------------------------------------|-----------------------------------|
| NADH-ubiquinone oxidoreductase 30.4 kDa subunit                | 440  | 1.00E-99  | 95%        | 51.95%     | <i>Plectosphaerella plurivora</i>  | KAH6681192.1                      |
| short chain dehydrogenase                                      | 301  | 1.00E-150 | 99%        | 76.17%     | <i>Sodiomyces alkalinus F11</i>    | XP_028470310.1                    |
| centrin-3                                                      | 190  | 4.00E-96  | 98%        | 69.68%     | <i>Sodiomyces alkalinus F11</i>    | XP_028470317.1                    |
| Iron-sulfur protein IND1                                       | 299  | 3.00E-158 | 98%        | 78.91%     | <i>Colletotrichum sidae</i>        | TEA13372.1                        |
| Splicing factor spf30                                          | 310  | 3.00E-113 | 100%       | 71.61%     | <i>Colletotrichum truncatum</i>    | XP_036586172.1                    |
| hypothetical protein B0T11DRAFT_249550                         | 384  | 4.00E-84  | 98%        | 53.98%     | <i>Plectosphaerella cucumerina</i> | KAH7375296.1                      |
| putative mitochondrial 2-oxoglutarate/malate carrier protein   | 335  | 1.00E-170 | 100%       | 86.27%     | <i>Colletotrichum chlorophyti</i>  | OLN95994.1                        |
| PAB-dependent poly(A)-specific ribonuclease subunit PAN2       | 340  | 0         | 100%       | 82.65%     | <i>Sodiomyces alkalinus F11</i>    | XP_028470311.1                    |
| chalcone and stilbene synthase domain-containing protein       | 479  | 0         | 75%        | 77.07%     | <i>Plectosphaerella cucumerina</i> | KAH7375301.1                      |
| TRAUB-domain-containing protein                                | 445  | 2.00E-129 | 66%        | 72.00%     | <i>Sodiomyces alkalinus F11</i>    | XP_028470322.1                    |
| putative stilbene synthase 2                                   | 432  | 0         | 100%       | 72.85%     | <i>Colletotrichum chlorophyti</i>  | OLN95986.1                        |
| TRAUB-domain-containing protein                                | 596  | 0         | 100%       | 63.48%     | <i>Sodiomyces alkalinus F11</i>    | XP_028470322.1                    |
| fungal specific transcription factor domain-containing protein | 609  | 0         | 99%        | 72.43%     | <i>Colletotrichum incanum</i>      | KZL80546.1                        |

|                           |     |           |      |        |                                                  |                |
|---------------------------|-----|-----------|------|--------|--------------------------------------------------|----------------|
| Feruloyl esterase B       | 294 | 1.00E-145 | 91%  | 72.49% | <i>Colletotrichum orbiculare</i><br>MAFF 240422  | TDZ25527.1     |
| oxidoreductase            | 451 | 0         | 99%  | 64.37% | <i>Plectosphaerella plurivora</i>                | KAH6681205.1   |
| Acetyltransferase         | 244 | 4.00E-112 | 81%  | 68.80% | <i>Colletotrichum higginsianum</i><br>IMI 349063 | XP_018159255.1 |
| carbonic anhydrase        | 271 | 3.00E-142 | 98%  | 70.79% | <i>Colletotrichum simmondsii</i>                 | KXH49803.1     |
| Glutathione S-transferase | 275 | 6.00E-128 | 100% | 67.63% | <i>Lasiodiplodia theobromae</i>                  | KAF9634029.1   |

**84) *Verticillium nonalfalfae* contig\_NW\_021167278, VRPKS-I-22 cluster**

| Gene name                                                   | Size | E value   | % Coverage | % identity | Top blast hit                               | Accession number of top blast hit |
|-------------------------------------------------------------|------|-----------|------------|------------|---------------------------------------------|-----------------------------------|
| RNA polymerase II transcription elongation factor           | 361  | 6.00E-109 | 100%       | 64.75%     | <i>Colletotrichum tofieldiae</i>            | KZL76908.1                        |
| COQ7-domain-containing protein                              | 244  | 3.00E-121 | 76%        | 90.86%     | <i>Sodiomyces alkalinus</i> F11             | XP_028463306.1                    |
| phospholipase D1                                            | 1819 | 0         | 99%        | 72.51%     | <i>Sodiomyces alkalinus</i> F11             | XP_028463305.1                    |
| tubulin/FtsZ family protein                                 | 461  | 0         | 100%       | 96.10%     | <i>Sodiomyces alkalinus</i> F11             | XP_028463304.1                    |
| uncharacterized protein<br>BCR38DRAFT_425087                | 90   | 1.00E-37  | 97%        | 75.00%     | <i>Pseudomassariella vexata</i>             | XP_040719305.1                    |
| hypothetical protein<br>SODALDRAFT_68083                    | 883  | 4.00E-11  | 13%        | 36.30%     | <i>Sodiomyces alkalinus</i> F11             | XP_028463302.1                    |
| P-loop containing nucleoside triphosphate hydrolase protein | 251  | 6.00E-117 | 100%       | 67.73%     | <i>Plectosphaerella cucumerina</i>          | KAH7357817.1                      |
| NAD-binding Rossmann fold oxidoreductase family protein     | 332  | 2.00E-124 | 99%        | 53.31%     | <i>Fusarium sarcochroum</i>                 | KAF4960431.1                      |
| major facilitator superfamily transporter                   | 588  | 0         | 89%        | 76.42%     | <i>Colletotrichum graminicola</i><br>M1.001 | XP_008093595.1                    |
| FAD-dependent monooxygenase kojA like protein               | 389  | 0         | 93%        | 71.98%     | <i>Bimuria novae-zelandiae</i> CBS 107.79   | KAF1970089.1                      |
| DUF341 domain-containing protein                            | 218  | 2.00E-109 | 100%       | 68.81%     | <i>Fusarium nygamai</i>                     | PNP83713.1                        |
| UDP-glucuronosyltransferase 2B13 like protein               | 553  | 0         | 98%        | 61.61%     | <i>Fusarium</i> sp. NRRL 66182              | KAF5020447.1                      |
| polyketide synthase                                         | 2635 | 0         | 99%        | 70.41%     | <i>Fusarium mexicanum</i>                   | KAF5539484.1                      |
| sulfate transporter family-domain-containing protein        | 1066 | 0         | 75%        | 54.28%     | <i>Bisporella</i> sp. PMI_857               | KAH8586595.1                      |
| hypothetical protein FLONG3_8802                            | 341  | 2.00E-21  | 84%        | 26.17%     | <i>Fusarium longipes</i>                    | RGP66606.1                        |
| hypothetical protein CNYM01_04222                           | 286  | 4.00E-64  | 51%        | 79.45%     | <i>Colletotrichum nymphaeae</i><br>SA-01    | KXH64953.1                        |
| MSF1 protein                                                | 192  | 5.00E-115 | 91%        | 88.07%     | <i>Sodiomyces alkalinus</i> F11             | XP_028463299.1                    |
| methionine aminopeptidase 2-like protein                    | 441  | 0         | 100%       | 84.75%     | <i>Plectosphaerella plurivora</i>           | KAH6686947.1                      |

|                                      |     |           |      |         |                            |                |
|--------------------------------------|-----|-----------|------|---------|----------------------------|----------------|
| Peroxisredoxin-like 2C               | 412 | 8.00E-163 | 82%  | 64.81%  | Plectosphaerella plurivora | KAH6686952.1   |
| uncharacterized protein D7B24_007046 | 265 | 3.00E-170 | 100% | 100.00% | Verticillium nonalfalfae   | XP_028494840.1 |

**85) *Verticillium nonalfalfae* contig\_ NW\_021167382, VRPKS-I-17 cluster**

| Gene name                                          | Size | E value   | % Coverage | % identity | Top blast hit                               | Accession number of top blast hit |
|----------------------------------------------------|------|-----------|------------|------------|---------------------------------------------|-----------------------------------|
| hypothetical protein G7Z17_g6650                   | 164  | 4.00E-34  | 78%        | 63.85%     | <i>Cylindrodendrum hubeiense</i>            | KAF7549055.1                      |
| Golgi to ER traffic protein 4 like                 | 334  | 3.00E-168 | 100%       | 79.10%     | <i>Colletotrichum gloeosporioides Cg-14</i> | EQB49343.1                        |
| mitochondrial import receptor subunit tom-40       | 352  | 0         | 100%       | 83.90%     | <i>Sodiomyces alkalinus F11</i>             | XP_028466992.1                    |
| 6-phosphofructo-2-kinase                           | 574  | 0         | 100%       | 84.54%     | <i>Plectosphaerella cucumerina</i>          | KAH7363100.1                      |
| ubiquitin C-terminal hydrolase                     | 823  | 0         | 100%       | 65.64%     | <i>Plectosphaerella cucumerina</i>          | KAH7363099.1                      |
| 54S ribosomal protein L7                           | 352  | 0         | 99%        | 73.14%     | <i>Sodiomyces alkalinus F11</i>             | XP_028466988.1                    |
| hsp70-like protein                                 | 209  | 1.00E-94  | 98%        | 68.25%     | <i>Plectosphaerella plurivora</i>           | KAH6686283.1                      |
| Actin                                              | 375  | 0         | 100%       | 100.00%    | <i>Tolypocladium paradoxum</i>              | POR36442.1                        |
| ABC transporter                                    | 1573 | 0         | 83%        | 68.64%     | <i>Colletotrichum nymphaeae SA-01</i>       | KXH49589.1                        |
| uncharacterized protein CORC01_10575               | 255  | 2.00E-150 | 100%       | 78.91%     | <i>Colletotrichum orchidophilum</i>         | XP_022471281.1                    |
| Reducing polyketide synthase PKS2                  | 2419 | 0         | 93%        | 70.29%     | <i>Colletotrichum chlorophyti</i>           | OLN86478.1                        |
| elongator protein 2 (WD domain-containing protein) | 828  | 0         | 99%        | 65.79%     | <i>Colletotrichum truncatum</i>             | XP_036582858.1                    |
| Ubiquitin- modifier 1                              | 104  | 2.00E-56  | 99%        | 79.61%     | <i>Claviceps pusilla</i>                    | KAG6012378.1                      |
| Asparagine-rich zinc finger protein AZF1           | 438  | 2.00E-116 | 89%        | 50.98%     | <i>Colletotrichum trifolii</i>              | TDZ74112.1                        |

**86) *Verticillium nonalfalfae* contig\_ NW\_021167282, VRPKS-I-19 cluster**

| Gene name                                                       | Size | E value  | % Coverage | % identity | Top blast hit                                 | Accession number of top blast hit |
|-----------------------------------------------------------------|------|----------|------------|------------|-----------------------------------------------|-----------------------------------|
| siderochrome-iron transporter MirB                              | 422  | 0        | 100%       | 69.43%     | <i>Ilyonectria sp. MPI-CAGE-AT-0026</i>       | KAH6972343.1                      |
| Extracellular serine-rich protein                               | 229  | 1.00E-60 | 81%        | 70.90%     | <i>Colletotrichum higginsianum IMI 349063</i> | XP_018161331.1                    |
| hypothetical protein SODALDRAFT_333514                          | 77   | 2.00E-21 | 97%        | 55.13%     | <i>Sodiomyces alkalinus F11</i>               | XP_028465568.1                    |
| hypothetical protein ACRE_064810                                | 288  | 5.00E-78 | 95%        | 47.45%     | <i>Acremonium chrysogenum ATCC 11550</i>      | KFH42767.1                        |
| N-glycosidase like protein                                      | 192  | 2.00E-51 | 83%        | 61.49%     | <i>Plectosphaerella cucumerina</i>            | KAH7347667.1                      |
| TIM44 subunit of mitochondria import inner membrane translocase | 543  | 0        | 87%        | 78.83%     | <i>Sodiomyces alkalinus F11</i>               | XP_028468965.1                    |
| hypothetical protein CFIO01_06157                               | 248  | 5.00E-95 | 100%       | 57.66%     | <i>Colletotrichum fiorinae PJ7</i>            | EXF75199.1                        |

|                                                      |      |           |      |        |                                               |                |
|------------------------------------------------------|------|-----------|------|--------|-----------------------------------------------|----------------|
| DeSI-like protein sdu1                               | 257  | 9.00E-129 | 97%  | 74.80% | <i>Colletotrichum chlorophyti</i>             | OLN97068.1     |
| Obg-like ATPase                                      | 394  | 0         | 100% | 88.58% | <i>Claviceps africana</i>                     | KAG5929667.1   |
| exopolysaccharuronase B like protein                 | 470  | 0         | 98%  | 69.16% | <i>Monosporascus sp. MG133</i>                | RYP36431.1     |
| thioredoxin                                          | 162  | 3.00E-78  | 98%  | 70.62% | <i>Colletotrichum orchidophilum</i>           | XP_022480245.1 |
| drug resistance protein                              | 576  | 0         | 97%  | 71.08% | <i>Plectosphaerella cucumerina</i>            | KAH7347641.1   |
| hypothetical protein J1614_005792                    | 2176 | 0         | 99%  | 78.94% | <i>Leptosphaeria biglobosa</i>                | KAH9873394.1   |
| hypothetical protein J1614_005793                    | 289  | 2.00E-117 | 90%  | 64.50% | <i>Leptosphaeria biglobosa</i>                | KAH9873395.1   |
| Ketose-bisphosphate aldolase class-ii family protein | 1096 | 0         | 99%  | 70.90% | <i>Colletotrichum higginsianum IMI 349063</i> | XP_018154864.1 |
| hypothetical protein F5X68DRAFT_50483                | 626  | 0         | 100% | 67.72% | <i>Plectosphaerella plurivora</i>             | KAH6669659.1   |
| putative transporter C1683.12-like protein 11        | 488  | 0         | 99%  | 76.59% | <i>Colletotrichum chlorophyti</i>             | OLN87319.1     |

#### 87) *Verticillium nonalfalfae* contig\_ NW\_021167434, VRPKS-I-23 cluster

| Gene name                                            | Size | E value  | % Coverage | % identity | Top blast hit                      | Accession number of top blast hit |
|------------------------------------------------------|------|----------|------------|------------|------------------------------------|-----------------------------------|
| virulence sensor protein bvgS                        | 1397 | 0        | 98%        | 65.63%     | <i>Plectosphaerella cucumerina</i> | KAH7358170.1                      |
| drug resistance transporter                          | 454  | 0        | 98%        | 68.53%     | <i>Plectosphaerella cucumerina</i> | KAH7358948.1                      |
| phenolphthiocerol synthesis polyketide synthase ppsA | 2379 | 0        | 98%        | 50.04%     | <i>Sodiomyces alkalinus F11</i>    | XP_028462492.1                    |
| hypothetical protein SODALDRAFT_82945                | 363  | 1.00E-90 | 100%       | 47.11%     | <i>Sodiomyces alkalinus F11</i>    | XP_028462491.1                    |
| hypothetical protein F5X68DRAFT_4497                 | 721  | 0        | 93%        | 64.37%     | <i>Plectosphaerella plurivora</i>  | KAH6697434.1                      |
| hypothetical protein F5X68DRAFT_257601               | 258  | 3.00E-11 | 88%        | 36.61%     | <i>Plectosphaerella plurivora</i>  | KAH6697435.1                      |

#### 88) *Verticillium nonalfalfae* contig\_ NW\_021167247, VRPKS-I-26 cluster

| Gene name                                                       | Size | E value   | % Coverage | % identity | Top blast hit                      | Accession number of top blast hit |
|-----------------------------------------------------------------|------|-----------|------------|------------|------------------------------------|-----------------------------------|
| Short chain dehydrogenase citE                                  | 292  | 5.00E-111 | 99%        | 57.73%     | <i>Colletotrichum siamense</i>     | KAF4822533.1                      |
| ankyrin repeat-containing domain protein                        | 1141 | 7.00E-110 | 60%        | 35.52%     | <i>Plectosphaerella plurivora</i>  | KAH6670890.1                      |
| C25 family cysteine peptidase                                   | 1017 | 0         | 99%        | 55.14%     | <i>Paraphoma chrysanthemicola</i>  | KAH7091334.1                      |
| hypothetical protein CMUS01_12901                               | 577  | 0         | 92%        | 87.57%     | <i>Colletotrichum musicola</i>     | KAF6813152.1                      |
| hypothetical protein F5X68DRAFT_158933                          | 365  | 0         | 98%        | 81.64%     | <i>Plectosphaerella plurivora</i>  | KAH6670884.1                      |
| choline dehydrogenase                                           | 616  | 0         | 95%        | 82.57%     | <i>Plectosphaerella cucumerina</i> | KAH7368263.1                      |
| Retinoic acid induced 16-like protein-domain-containing protein | 1277 | 0         | 77%        | 72.01%     | <i>Plectosphaerella cucumerina</i> | KAH7362743.1                      |
| hypothetical protein B0T11DRAFT_318355                          | 162  | 5.00E-48  | 98%        | 65.85%     | <i>Plectosphaerella cucumerina</i> | KAH7362742.1                      |

|                                        |      |           |     |         |                                     |                |
|----------------------------------------|------|-----------|-----|---------|-------------------------------------|----------------|
| putative polyketide synthase           | 1466 | 0         | 97% | 54.85%  | <i>Whalleya microplaca</i>          | KAI1073750.1   |
| TTL domain-containing protein          | 472  | 0         | 99% | 69.15%  | <i>Coniochaeta sp. 2T2.1</i>        | KAB5518934.1   |
| peptidase family M28                   | 609  | 2.00E-176 | 52% | 76.09%  | <i>Dactylonectria estremocensis</i> | KAH7144232.1   |
| hypothetical protein CGCVW01_v010845   | 317  | 4.00E-10  | 30% | 64.00%  | <i>Colletotrichum viniferum</i>     | KAF4913593.1   |
| hypothetical protein SODALDRAFT_326753 | 200  | 1.00E-87  | 94% | 57.52%  | <i>Sodiomyces alkalinus F11</i>     | XP_028470403.1 |
| hypothetical protein CI238_07639       | 126  | 0.004     | 26% | 100.00% | <i>Colletotrichum incanum</i>       | KZL63877.1     |
| ubiquitin carboxyl-terminal hydrolase  | 397  | 6.00E-127 | 84% | 64.41%  | <i>Plectosphaerella cucumerina</i>  | KAH7369286.1   |

**89) *Verticillium nonalfalfae* contig\_ NW\_021167324, VNRPKS-I-1 cluster**

| Gene name                                                | Size | E value   | % Coverage | % identity | Top blast hit                         | Accession number of top blast hit |
|----------------------------------------------------------|------|-----------|------------|------------|---------------------------------------|-----------------------------------|
| oxidoreductase                                           | 326  | 0.00E+00  | 99%        | 84.62%     | <i>Colletotrichum truncatum</i>       | XP_036586400.1                    |
| Conidial yellow pigment biosynthesis polyketide synthase | 2192 | 0.00E+00  | 100%       | 75.72%     | <i>Colletotrichum gloeosporioides</i> | XP_045268234.1                    |
| iron transport multicopper oxidase fetC                  | 549  | 0         | 94%        | 65.80%     | <i>Colletotrichum liriopes</i>        | GKT45119.1                        |
| uncharacterized protein D7B24_009601                     | 201  | 9.00E-137 | 99%        | 94.47%     | <i>Verticillium nonalfalfae</i>       | XP_028492744.1                    |
| duf92 domain protein                                     | 390  | 1.00E-145 | 99%        | 64.86%     | <i>Sodiomyces alkalinus F11</i>       | XP_028469270.1                    |
| pyridoxal-dependent decarboxylase                        | 533  | 0         | 98%        | 59.77%     | <i>Plectosphaerella plurivora</i>     | KAH6697039.1                      |
| putative kinetochore protein                             | 91   | 8.00E-24  | 100%       | 63.74%     | <i>Phaeoacremonium minimum UCRPA7</i> | XP_007911737.1                    |
| complex I intermediate-associated protein                | 710  | 0.00E+00  | 99%        | 74.30%     | <i>Sodiomyces alkalinus F11</i>       | XP_028469267.1                    |
| ribosomal protein S18                                    | 162  | 9.00E-73  | 95%        | 69.48%     | <i>Sodiomyces alkalinus F11</i>       | XP_028469266.1                    |

**90) *Verticillium nonalfalfae* contig\_ NW\_021167257, VNRPKS-I-3 cluster**

| Gene name                                           | Size | E value   | % Coverage | % identity | Top blast hit                   | Accession number of top blast hit |
|-----------------------------------------------------|------|-----------|------------|------------|---------------------------------|-----------------------------------|
| dibenzothiophene desulfurization enzyme C           | 428  | 0         | 100%       | 81.02%     | <i>Ilyonectria destructans</i>  | KAH7000608.1                      |
| Acetate transporter protein                         | 204  | 2.00E-110 | 97%        | 86.36%     | <i>Ilyonectria destructans</i>  | KAH7000609.1                      |
| FAD binding domain-containing protein               | 511  | 0         | 95%        | 69.75%     | <i>Sodiomyces alkalinus F11</i> | XP_028469411.1                    |
| alpha/beta-hydrolase                                | 381  | 2.00E-160 | 99%        | 58.96%     | <i>Sodiomyces alkalinus F11</i> | XP_028463045.1                    |
| FAD/NAD(P)-binding domain-containing protein        | 759  | 0         | 99%        | 68.64%     | <i>Sodiomyces alkalinus F11</i> | XP_028463046.1                    |
| S-adenosyl-L-methionine-dependent methyltransferase | 486  | 0         | 100%       | 64.42%     | <i>Sodiomyces alkalinus F11</i> | XP_028463047.1                    |
| hypothetical protein SODALDRAFT_329430              | 411  | 2.00E-100 | 100%       | 45.08%     | <i>Sodiomyces alkalinus F11</i> | XP_028463048.1                    |



|                                                      |      |           |      |        |                                       |                |
|------------------------------------------------------|------|-----------|------|--------|---------------------------------------|----------------|
| serine 3-dehydrogenase                               | 283  | 1.00E-154 | 98%  | 73.93% | <i>Akanthomyces lecanii RCEF 1005</i> | OAA81050.1     |
| acetyl-CoA synthetase-like protein                   | 772  | 0         | 98%  | 56.58% | <i>Sodiomyces alkalinus F11</i>       | XP_028463042.1 |
| phenolphthiocerol synthesis polyketide synthase ppsA | 423  | 4.00E-131 | 87%  | 55.50% | <i>Sodiomyces alkalinus F11</i>       | XP_028463040.1 |
| putative transporter C460.03-like protein 2          | 515  | 0.00E+00  | 91%  | 86.53% | <i>Colletotrichum chlorophyti</i>     | OLN93090.1     |
| pectate lyase                                        | 243  | 7.00E-154 | 100% | 92.59% | <i>Plectosphaerella cucumerina</i>    | KAH7359289.1   |
| hypothetical protein B0T11DRAFT_289698               | 403  | 9.00E-99  | 99%  | 45.58% | <i>Plectosphaerella cucumerina</i>    | KAH7349693.1   |
| WD repeat-containing protein                         | 565  | 0         | 99%  | 72.57% | <i>Plectosphaerella cucumerina</i>    | KAH7349692.1   |
| Sterol 3-beta-glucosyltransferase                    | 1453 | 0.00E+00  | 94%  | 69.89% | <i>Colletotrichum siamense</i>        | KAF4841498.1   |
| Tryprostatin B 6-hydroxylase                         | 276  | 6.00E-93  | 97%  | 52.99% | <i>Colletotrichum higginsianum</i>    | TIC94206.1     |
| NYN domain-containing protein                        | 200  | 2.00E-91  | 94%  | 73.54% | <i>Hypomontagnella submonticulosa</i> | KAI2617645.1   |

**91) *Verticillium nonalfalfae* contig\_NW\_021167286, PKS-III cluster**

| Gene name                                                      | Size | E value   | % Coverage | % identity | Top blast hit                                | Accession number of top blast hit |
|----------------------------------------------------------------|------|-----------|------------|------------|----------------------------------------------|-----------------------------------|
| putative ATP-dependent helicase                                | 1116 | 0         | 51%        | 75.48%     | <i>Colletotrichum chlorophyti</i>            | OLN95968.1                        |
| uncharacterized protein GLRG_10587                             | 489  | 1.00E-71  | 67%        | 43.13%     | <i>Colletotrichum graminicola M1.001</i>     | XP_008099463.1                    |
| NADH-ubiquinone oxidoreductase 30.4 kDa subunit                | 496  | 3.00E-52  | 83%        | 50.00%     | <i>Plectosphaerella cucumerina</i>           | KAH7375303.1                      |
| short chain dehydrogenase                                      | 312  | 1.00E-138 | 99%        | 72.82%     | <i>Sodiomyces alkalinus F11</i>              | XP_028470310.1                    |
| centrin-3                                                      | 191  | 7.00E-93  | 98%        | 69.31%     | <i>Sodiomyces alkalinus F11</i>              | XP_028470317.1                    |
| Iron-sulfur protein IND1                                       | 296  | 3.00E-177 | 99%        | 79.59%     | <i>Colletotrichum sidae</i>                  | TEA13372.1                        |
| Splicing factor spf30                                          | 309  | 8.00E-118 | 100%       | 71.20%     | <i>Colletotrichum truncatum</i>              | XP_036586172.1                    |
| hypothetical protein B0T11DRAFT_249550                         | 646  | 1.00E-149 | 96%        | 58.02%     | <i>Plectosphaerella cucumerina</i>           | KAH7375296.1                      |
| putative mitochondrial 2-oxoglutarate/malate carrier protein   | 335  | 1.00E-170 | 100%       | 86.27%     | <i>Colletotrichum chlorophyti</i>            | OLN95994.1                        |
| PAB-dependent poly(A)-specific ribonuclease subunit PAN2       | 1965 | 0         | 55%        | 77.55%     | <i>Sodiomyces alkalinus F11</i>              | XP_028470311.1                    |
| putative stilbene synthase 2                                   | 432  | 0         | 100%       | 72.91%     | <i>Colletotrichum chlorophyti</i>            | OLN95986.1                        |
| TRAUB-domain-containing protein                                | 594  | 2.00E-145 | 85%        | 72.05%     | <i>Sodiomyces alkalinus F11</i>              | XP_028470322.1                    |
| fungal specific transcription factor domain-containing protein | 608  | 0         | 99%        | 72.39%     | <i>Colletotrichum incanum</i>                | KZL80546.1                        |
| Feruloyl esterase B                                            | 294  | 3.00E-145 | 91%        | 72.12%     | <i>Colletotrichum orbiculare MAFF 240422</i> | TDZ25527.1                        |

|                    |     |           |     |        |                                                         |                |
|--------------------|-----|-----------|-----|--------|---------------------------------------------------------|----------------|
| oxidoreductase     | 451 | 0         | 99% | 64.37% | <i>Plectosphaerella plurivora</i>                       | KAH6681205.1   |
| Acetyltransferase  | 278 | 8.00E-145 | 84% | 82.55% | <i>Colletotrichum higginsianum</i><br><i>IMI 349063</i> | XP_018159255.1 |
| carbonic anhydrase | 271 | 6.00E-145 | 98% | 71.91% | <i>Colletotrichum simmondsii</i>                        | KXH49803.1     |

**92) *Verticillium nonalfalfae* contig\_ NW\_021167275, VRPKS-I-9 and VRPKS-I-11 clusters**

| Gene name                                                      | Size | E value   | % Coverage | % identity | Top blast hit                                           | Accession number of top blast hit |
|----------------------------------------------------------------|------|-----------|------------|------------|---------------------------------------------------------|-----------------------------------|
| X-Pro dipeptidyl-peptidase protein                             | 300  | 1.00E-138 | 100%       | 68.44%     | <i>Diaporthaceae sp. PMI_573</i>                        | KAH8742789.1                      |
| uncharacterized protein D7B24_006854                           | 466  | 0         | 100%       | 100.00%    | <i>Verticillium nonalfalfae</i>                         | XP_028494997.1                    |
| aflatoxin biosynthesis ketoreductase nor-1                     | 250  | 6.00E-111 | 100%       | 63.49%     | <i>Plectosphaerella plurivora</i>                       | KAH6692198.1                      |
| ankyrin repeat-containing domain protein                       | 338  | 3.00E-57  | 47%        | 59.39%     | <i>Plectosphaerella cucumerina</i>                      | KAH7375435.1                      |
| hypothetical protein C2857_005093                              | 362  | 0         | 98%        | 80.79%     | <i>Epichloe festucae F11</i>                            | QPH06552.1                        |
| putative efflux pump antibiotic resistance protein             | 550  | 0         | 94%        | 65.77%     | <i>Hypoxylon sp. FL0890</i>                             | KAI0837754.1                      |
| short-chain dehydrogenase                                      | 287  | 1.00E-107 | 99%        | 63.51%     | <i>Plectosphaerella cucumerina</i>                      | KAH7347401.1                      |
| uncharacterized protein BCR38DRAFT_489105                      | 204  | 9.00E-61  | 87%        | 52.49%     | <i>Pseudomassariella vexata</i>                         | XP_040711558.1                    |
| putative polyketide synthase                                   | 3858 | 0         | 100%       | 47.99%     | <i>Acremonium chrysogenum</i><br><i>ATCC 11550</i>      | KFH45364.1                        |
| fungus-specific transcription factor domain-containing protein | 750  | 0         | 82%        | 61.79%     | <i>Plectosphaerella cucumerina</i>                      | KAH7347400.1                      |
| hypothetical protein VSDG_07360                                | 365  | 9.00E-42  | 84%        | 34.60%     | <i>Valsa sordida</i>                                    | ROV93079.1                        |
| hypothetical protein B0T11DRAFT_326518                         | 524  | 3.00E-36  | 54%        | 33.45%     | <i>Plectosphaerella cucumerina</i>                      | KAH7368326.1                      |
| putative Hybrid PKS-NRPS biosynthetic cluster                  | 3856 | 0         | 99%        | 70.68%     | <i>Hirsutella rhossiliensis</i>                         | XP_044717051.1                    |
| HpcH/HpaI aldolase                                             | 284  | 3.00E-150 | 98%        | 79.72%     | <i>Colletotrichum higginsianum</i><br><i>IMI 349063</i> | XP_018154477.1                    |
| major facilitator superfamily domain-containing protein        | 495  | 0         | 97%        | 79.25%     | <i>Plectosphaerella cucumerina</i>                      | KAH7361596.1                      |
| D-isomer specific 2-hydroxyacid dehydrogenase                  | 304  | 4.00E-162 | 98%        | 76.33%     | <i>Ilyonectria sp. MPI-CAGE-AT-0026</i>                 | KAH6989082.1                      |
| hypothetical protein BKA56DRAFT_641098                         | 426  | 4.00E-119 | 97%        | 45.33%     | <i>Ilyonectria sp. MPI-CAGE-AT-0026</i>                 | KAH6989083.1                      |

**93) *Verticillium nubilum* contig\_ NMXI01000001, VRPKS-I-17 cluster**

| Gene name                             | Size | E value  | % Coverage | % identity | Top blast hit                      | Accession number of top blast hit |
|---------------------------------------|------|----------|------------|------------|------------------------------------|-----------------------------------|
| hypothetical protein B0T11DRAFT_91086 | 133  | 7.00E-39 | 72%        | 69.70%     | <i>Plectosphaerella cucumerina</i> | KAH7363103.1                      |

|                                                      |      |           |      |         |                                          |                |
|------------------------------------------------------|------|-----------|------|---------|------------------------------------------|----------------|
| duf410 domain-containing protein                     | 331  | 4.00E-166 | 91%  | 82.24%  | <i>Colletotrichum sojae</i>              | KAF6819727.1   |
| isoflavone reductase                                 | 290  | 2.00E-81  | 97%  | 44.55%  | <i>Colletotrichum graminicola M1.</i>    | XP_008091926.1 |
| mitochondrial import receptor subunit tom-40         | 352  | 0         | 100% | 83.05%  | <i>Sodiomyces alkalinus F11</i>          | XP_028466992.1 |
| 6-phosphofructo-2-kinase/fructose-2,6-bisphosphatase | 528  | 0         | 100% | 86.11%  | <i>Colletotrichum plurivorum</i>         | KAF6841603.1   |
| ubiquitin C-terminal hydrolase                       | 823  | 0         | 100% | 66.63%  | <i>Plectosphaerella cucumerina</i>       | KAH7363099.1   |
| 54S ribosomal protein L7                             | 352  | 0         | 99%  | 73.22%  | <i>Sodiomyces alkalinus F11</i>          | XP_028466988.1 |
| nucleotide exchange factor Fes1                      | 209  | 1.00E-94  | 99%  | 70.67%  | <i>Sodiomyces alkalinus F11</i>          | XP_028466987.1 |
| Actin                                                | 375  | 0         | 100% | 100.00% | <i>Tolypocladium paradoxum</i>           | POR36442.1     |
| ABC transporter                                      | 1485 | 0         | 87%  | 69.67%  | <i>Colletotrichum incanum</i>            | OHW91062.1     |
| duf341 family                                        | 255  | 5.00E-150 | 100% | 77.73%  | <i>Colletotrichum sojae</i>              | KAF6806434.1   |
| Lovastatin diketide synthase LovF 16                 | 2296 | 0         | 99%  | 70.16%  | <i>Colletotrichum chlorophyti</i>        | OLN86478.1     |
| hypothetical protein SODALDRAFT_332602               | 113  | 8.00E-44  | 79%  | 76.67%  | <i>Sodiomyces alkalinus F11</i>          | XP_028466984.1 |
| elongator protein 2 (WD domain-containing protein)   | 826  | 0         | 99%  | 66.27%  | <i>Colletotrichum truncatum</i>          | XP_036582858.1 |
| Ubiquitin- modifier 1                                | 89   | 1.00E-49  | 100% | 83.15%  | <i>Claviceps pusilla</i>                 | KAG6012378.1   |
| hypothetical protein CGLO_15588                      | 438  | 8.00E-120 | 88%  | 49.26%  | <i>Colletotrichum gloeosporioides 14</i> | EQB45519.1     |
| Mitochondrial FAD carrier protein FLX1               | 312  | 1.00E-147 | 99%  | 71.83%  | <i>Colletotrichum higginsianum</i>       | TIC98890.1     |

#### 94) *Verticillium nubilum* contig\_ NMXI01000076, VRPKS-I-10 cluster

| Gene name                                        | Size | E value   | % Coverage | % identity | Top blast hit                             | Accession number of top blast hit |
|--------------------------------------------------|------|-----------|------------|------------|-------------------------------------------|-----------------------------------|
| Proline oxidase                                  | 468  | 0         | 88%        | 62.26%     | <i>Penicillium expansum</i>               | XP_016597406.1                    |
| alpha/beta hydrolase fold family protein         | 601  | 0         | 84%        | 66.27%     | <i>Colletotrichum tofieldiae</i>          | KZL64421.1                        |
| hypothetical protein EDB80DRAFT_89890            | 418  | 0         | 81%        | 88.27%     | <i>Ilyonectria destructans</i>            | KAH7001356.1                      |
| shikimate/quinic acid 5-dehydrogenase            | 366  | 8.00E-130 | 99%        | 59.79%     | <i>Colletotrichum higginsianum 349063</i> | XP_018164247.1                    |
| Proline utilization trans-activator like protein | 689  | 0         | 95%        | 61.47%     | <i>Plectosphaerella cucumerina</i>        | KAH7375570.1                      |
| beta-ketoacyl synthase domain-containing protein | 1703 | 0         | 99%        | 54.33%     | <i>Coniochaeta sp. PMI_546</i>            | KAH8906691.1                      |
| hypothetical protein F5X68DRAFT_47703            | 219  | 3.00E-51  | 88%        | 42.73%     | <i>Plectosphaerella plurivora</i>         | KAH6693919.1                      |
| hypothetical protein B0T11DRAFT_86728            | 594  | 0         | 99%        | 69.13%     | <i>Plectosphaerella cucumerina</i>        | KAH7362695.1                      |
| 2OG-Fe oxygenase family protein                  | 332  | 8.00E-157 | 99%        | 69.79%     | <i>Colletotrichum incanum</i>             | OHW94343.1                        |
| Uracil permease like protein                     | 566  | 0         | 97%        | 76.90%     | <i>Colletotrichum camelliae</i>           | KAH0420306.1                      |
| d-isomer specific 2-hydroxyacid dehydrogenase    | 314  | 0         | 100%       | 85.03%     | <i>Fusarium albosuccineum</i>             | KAF4467173.1                      |
| hypothetical protein BT63DRAFT_423135            | 323  | 4.00E-60  | 78%        | 69.46%     | <i>Microthyrium microscopium</i>          | KAF2670841.1                      |
| Endoglucanase-4                                  | 295  | 9.00E-107 | 87%        | 57.85%     | <i>Colletotrichum sidae</i>               | TEA13904.1                        |
| epoxide hydrolase                                | 405  | 3.00E-174 | 99%        | 61.19%     | <i>Plectosphaerella plurivora</i>         | KAH6662678.1                      |

#### 95) *Verticillium nubilum* contig\_ NMXI01000091, VRPKS-I-15 cluster

| Gene name                             | Size | E value   | % Coverage | % identity | Top blast hit                  | Accession number of top blast hit |
|---------------------------------------|------|-----------|------------|------------|--------------------------------|-----------------------------------|
| hypothetical protein M426DRAFT_316265 | 382  | 4.00E-121 | 92%        | 49.72%     | <i>Hypoxylon sp. CI-4A</i>     | OTB08973.1                        |
| hypothetical protein FDECE_625        | 488  | 0         | 98%        | 78.84%     | <i>Fusarium decemcellulare</i> | KAF5013378.1                      |

|                                              |      |           |      |        |                                           |                |
|----------------------------------------------|------|-----------|------|--------|-------------------------------------------|----------------|
| hypothetical protein CH63R_01711             | 269  | 4.00E-60  | 82%  | 48.46% | <i>Colletotrichum higginsianum</i> 349063 | XP_018165048.1 |
| dihydroxy-acid dehydratase                   | 622  | 0         | 99%  | 82.88% | <i>Plectosphaerella cucumerina</i>        | KAH7367439.1   |
| putative salicylate hydroxylase              | 445  | 0         | 92%  | 78.35% | <i>Dactylonectria macrodidyma</i>         | KAH7133940.1   |
| Type I Iterative Polyketide synthase (PKS)   | 2578 | 0         | 87%  | 68.74% | <i>Ilyonectria destructans</i>            | KAH7019735.1   |
| short chain dehydrogenase                    | 254  | 2.00E-122 | 99%  | 66.01% | <i>Ilyonectria destructans</i>            | KAH7019726.1   |
| serine hydrolase FSH                         | 264  | 7.00E-92  | 98%  | 54.98% | <i>Dactylonectria macrodidyma</i>         | KAH7133931.1   |
| putative short-chain dehydrogenase/reductase | 283  | 1.00E-154 | 98%  | 74.19% | <i>Ilyonectria destructans</i>            | KAH7019737.1   |
| beta-lactamase/transpeptidase-like protein   | 594  | 0         | 95%  | 77.76% | <i>Dactylonectria macrodidyma</i>         | KAH7133934.1   |
| trichothecene 3-o-acetyltransferase          | 454  | 0         | 97%  | 71.24% | <i>Dactylonectria macrodidyma</i>         | KAH7133935.1   |
| polyketide synthase                          | 2690 | 0         | 99%  | 68.09% | <i>Dactylonectria macrodidyma</i>         | KAH7133936.1   |
| inorganic phosphate transport PHO88          | 165  | 1.00E-43  | 100% | 42.86% | <i>Scedosporium apiospermum</i>           | XP_016645996.1 |
| putative O-methyltransferase                 | 257  | 8.00E-151 | 100% | 86.77% | <i>Dactylonectria macrodidyma</i>         | KAH7133929.1   |
| putative ariadne-like RING finger protein R8 | 697  | 0         | 97%  | 56.61% | <i>Colletotrichum siamense</i>            | KAF4823164.1   |

**96) *Verticillium nubilum* contig\_ NMXI01000024, VRPKS-I-19 cluster**

| Gene name                                                     | Size | E value   | % Coverage | % identity | Top blast hit                             | Accession number of top blast hit |
|---------------------------------------------------------------|------|-----------|------------|------------|-------------------------------------------|-----------------------------------|
| uncharacterized protein B0J16DRAFT_30603                      | 213  | 3.00E-85  | 99%        | 62.26%     | <i>Fusarium flagelliforme</i>             | XP_045983921.1                    |
| uncharacterized protein B0J16DRAFT_41549                      | 302  | 1.00E-170 | 99%        | 75.08%     | <i>Fusarium flagelliforme</i>             | XP_045983920.1                    |
| uncharacterized protein B0J16DRAFT_36324                      | 1353 | 0         | 98%        | 77.39%     | <i>Fusarium flagelliforme</i>             | XP_045983919.1                    |
| uncharacterized protein B0J16DRAFT_34344                      | 1203 | 0         | 100%       | 76.84%     | <i>Fusarium flagelliforme</i>             | XP_045983918.1                    |
| hypothetical protein HYQ44_014562                             | 136  | 0.028     | 75%        | 34.92%     | <i>Verticillium longisporum</i>           | KAG7105862.1                      |
| phthalate transporter                                         | 488  | 0         | 98%        | 75.57%     | <i>Emericellopsis atlantica</i>           | XP_046114251.1                    |
| hypothetical protein F5X68DRAFT_50483                         | 670  | 0         | 100%       | 64.61%     | <i>Plectosphaerella plurivora</i>         | KAH6669659.1                      |
| Ketose-bisphosphate aldolase class-ii family protein          | 1134 | 0         | 98%        | 73.91%     | <i>Colletotrichum higginsianum</i> 349063 | XP_018154864.1                    |
| Type I Iterative PKS                                          | 2174 | 0         | 100%       | 85.90%     | <i>Leptosphaeria biglobosa</i>            | KAH9873394.1                      |
| major facilitator superfamily transporte                      | 577  | 0         | 98%        | 67.65%     | <i>Plectosphaerella plurivora</i>         | KAH6679835.1                      |
| thioredoxin-like protein                                      | 162  | 3.00E-75  | 91%        | 73.65%     | <i>Hypoxylon sp. FL0890</i>               | KAI0834638.1                      |
| exopolysaccharuronase B like protein                          | 487  | 0         | 98%        | 68.39%     | <i>Monosporascus sp. mg162</i>            | RYP54678.1                        |
| Obg-like ATPase                                               | 394  | 0         | 100%       | 90.10%     | <i>Pyricularia grisea</i>                 | XP_030984371.1                    |
| DeSI-like protein sdu1                                        | 219  | 6.00E-106 | 99%        | 75.12%     | <i>Colletotrichum chlorophyti</i>         | OLN97068.1                        |
| putative 37S ribosomal protein S18, mitochondrial             | 250  | 6.00E-93  | 100%       | 56.40%     | <i>Colletotrichum nymphaeae SA-0</i>      | KXH60786.1                        |
| Mitochondrial import inner membrane translocase subunit tim44 | 540  | 0         | 100%       | 74.59%     | <i>Sodiomyces alkalinus F11</i>           | XP_028468965.1                    |

**97) *Verticillium nubilum* contig\_ NMXI01000024, VRPKS-I-21 cluster**

| Gene name                                | Size | E value   | % Coverage | % identity | Top blast hit                      | Accession number of top blast hit |
|------------------------------------------|------|-----------|------------|------------|------------------------------------|-----------------------------------|
| uncharacterized protein B0J15DRAFT_50616 | 685  | 0         | 100%       | 67.92%     | <i>Fusarium solani</i>             | XP_046123856.1                    |
| ricin B lectin                           | 175  | 4.00E-109 | 100%       | 84.57%     | <i>Colletotrichum simmondsii</i>   | KXH31006.1                        |
| Alpha/Beta hydrolase protein             | 230  | 4.00E-90  | 97%        | 66.67%     | <i>Fusarium sp. MPI-SDFR-AT-06</i> | KAH7180213.1                      |

|                                     |      |          |      |        |                                    |              |
|-------------------------------------|------|----------|------|--------|------------------------------------|--------------|
| general substrate transporter       | 230  | 3.00E-80 | 90%  | 62.88% | <i>Dactylonectria macrodidyma</i>  | KAH7161520.1 |
| kinesin family protein              | 811  | 0        | 99%  | 77.04% | <i>Plectosphaerella cucumerina</i> | KAH7367003.1 |
| Lovastatin diketide synthase LovF 2 | 2453 | 0        | 100% | 70.18% | <i>Colletotrichum chlorophyti</i>  | OLN91972.1   |

**98) *Verticillium nubilum* contig\_ NMXI01000023, VRPKS-I-26 cluster**

| Gene name                                   | Size | E value   | % Coverage | % identity | Top blast hit                           | Accession number of top blast hit |
|---------------------------------------------|------|-----------|------------|------------|-----------------------------------------|-----------------------------------|
| Short chain dehydrogenase citE like protein | 287  | 3.00E-110 | 99%        | 60.07%     | <i>Colletotrichum camelliae</i>         | KAH0428843.1                      |
| hypothetical protein ColSpa_11746           | 421  | 1.00E-83  | 85%        | 42.11%     | <i>Colletotrichum spaethianum</i>       | GJC88908.1                        |
| ankyrin repeat-containing domain protein    | 782  | 6.00E-124 | 88%        | 36.75%     | <i>Plectosphaerella plurivora</i>       | KAH6670890.1                      |
| hypothetical protein F5X68DRAFT_228683      | 77   | 2.00E-16  | 62%        | 73.47%     | <i>Plectosphaerella plurivora</i>       | KAH6692307.1                      |
| peptidase family C25-domain-containing prot | 1017 | 0.00E+00  | 100%       | 54.44%     | <i>Paraphoma chrysanthemicola</i>       | KAH7091334.1                      |
| hypothetical protein CMUS01_12901           | 577  | 0         | 93%        | 86.78%     | <i>Colletotrichum musicola</i>          | KAF6813152.1                      |
| putative pectate lyase F                    | 236  | 5.00E-141 | 97%        | 84.85%     | <i>Colletotrichum fruticola</i>         | XP_031890093.1                    |
| hypothetical protein VDGE_07268             | 990  | 0         | 94%        | 76.15%     | <i>Plectosphaerella cucumerina</i>      | KAH7362743.1                      |
| hypothetical protein F5X68DRAFT_264904      | 162  | 4.00E-44  | 84%        | 72.26%     | <i>Plectosphaerella plurivora</i>       | KAH6670875.1                      |
| uncharacterized protein KVR01_004169        | 130  | 9.00E-10  | 56%        | 43.24%     | <i>Diaporthe batatas</i>                | XP_044646333.1                    |
| hypothetical protein DL768_003915           | 2345 | 0         | 99%        | 51.02%     | <i>Whalleya microplaca</i>              | KAI1073750.1                      |
| TTL domain-containing protein               | 472  | 0         | 100%       | 74.69%     | <i>Coniochaeta sp. 2T2.1</i>            | KAB5518934.1                      |
| retinol dehydrogenase                       | 343  | 2.00E-164 | 89%        | 72.40%     | <i>Plectosphaerella cucumerina</i>      | KAH7369374.1                      |
| peptidase family M28                        | 373  | 0         | 91%        | 81.82%     | <i>Dactylonectria estremocensis</i>     | KAH7144232.1                      |
| hypothetical protein B0T11DRAFT_271851      | 339  | 1.00E-111 | 85%        | 58.16%     | <i>Plectosphaerella cucumerina</i>      | KAH7376217.1                      |
| hypothetical protein FPSE_04937             | 125  | 2.00E-50  | 100%       | 74.62%     | <i>Fusarium pseudogramine</i><br>CS3096 | XP_009256330.1                    |
| uncharacterized protein CGCS363_v014577     | 329  | 2.00E-11  | 29%        | 66.00%     | <i>Colletotrichum siamense</i>          | XP_036488857.1                    |
| hypothetical protein SODALDRAFT_326753      | 200  | 2.00E-90  | 99%        | 56.78%     | <i>Sodiomyces alkalinus F11</i>         | XP_028470403.1                    |

**99) *Verticillium nubilum* contig\_ NMXI01000025, VRPKS-I-23 cluster**

| Gene name                                              | Size | E value   | % Coverage | % identity | Top blast hit                               | Accession number of top blast hit |
|--------------------------------------------------------|------|-----------|------------|------------|---------------------------------------------|-----------------------------------|
| putative amid-like mitochondrial protein               | 196  | 2.00E-90  | 99%        | 72.31%     | <i>Phaeoacremonium</i> <i>min</i><br>UCRPA7 | XP_007913672.1                    |
| hypothetical protein SODALDRAFT_200929                 | 308  | 5.00E-23  | 34%        | 71.03%     | <i>Sodiomyces alkalinus F11</i>             | XP_028465407.1                    |
| hypothetical protein SODALDRAFT_334713                 | 229  | 1.00E-47  | 59%        | 65.22%     | <i>Sodiomyces alkalinus F11</i>             | XP_028465408.1                    |
| SRP54-domain-containing protein                        | 668  | 0         | 100%       | 80.00%     | <i>Sodiomyces alkalinus F11</i>             | XP_028465413.1                    |
| hypothetical protein CSAL01_08458                      | 323  | 9.00E-169 | 99%        | 85.94%     | <i>Colletotrichum salicis</i>               | KXH65676.1                        |
| PXMP2/4 family protein 3 like                          | 229  | 1.00E-114 | 99%        | 76.21%     | <i>Plectosphaerella cucumerina</i>          | KAH7358280.1                      |
| hypothetical protein B0T11DRAFT_299362                 | 113  | 7.00E-62  | 100%       | 79.65%     | <i>Plectosphaerella cucumerina</i>          | KAH7358281.1                      |
| virulence sensor protein bvgS                          | 1391 | 0         | 99%        | 65.71%     | <i>Plectosphaerella cucumerina</i>          | KAH7358170.1                      |
| drug resistance transporter                            | 588  | 0         | 99%        | 69.51%     | <i>Plectosphaerella plurivora</i>           | KAH6697430.1                      |
| phenolphthiocerol synthesis polyketide synthas<br>ppsA | 2376 | 0         | 99%        | 50.96%     | <i>Sodiomyces alkalinus F11</i>             | XP_028462492.1                    |
| hypothetical protein                                   | 544  | 2.00E-129 | 61%        | 65.14%     | <i>Sodiomyces alkalinus F11</i>             | XP_028462485.1                    |

**100) *Verticillium nubilum* contig\_ NMXI01000041, VPKS-III cluster**

| Gene name                                                      | Size | E value   | % Coverage | % identity | Top blast hit                                | Accession number of top blast hit |
|----------------------------------------------------------------|------|-----------|------------|------------|----------------------------------------------|-----------------------------------|
| short chain dehydrogenase                                      | 300  | 1.00E-165 | 97%        | 77.40%     | <i>Sodiomyces alkalinus F11</i>              | XP_028470310.1                    |
| centrin-3                                                      | 190  | 2.00E-95  | 98%        | 69.68%     | <i>Sodiomyces alkalinus F11</i>              | XP_028470317.1                    |
| Iron-sulfur protein IND1                                       | 296  | 2.00E-161 | 99%        | 81.29%     | <i>Colletotrichum sidae</i>                  | TEA13372.1                        |
| Splicing factor spf30                                          | 304  | 4.00E-107 | 99%        | 72.19%     | <i>Colletotrichum truncatum</i>              | XP_036586172.1                    |
| hypothetical protein B0T11DRAFT_249550                         | 636  | 3.00E-149 | 96%        | 60.57%     | <i>Plectosphaerella cucumerina</i>           | KAH7375296.1                      |
| putative mitochondrial 2-oxoglutarate/malate carrier protein   | 335  | 5.00E-172 | 100%       | 87.46%     | <i>Colletotrichum gloeosporioides</i>        | XP_045260884.1                    |
| exonuclease                                                    | 1601 | 0         | 65%        | 76.44%     | <i>Sodiomyces alkalinus F11</i>              | XP_028470311.1                    |
| fructose-bisphosphate aldolase                                 | 362  | 0         | 100%       | 89.78%     | <i>Plectosphaerella cucumerina</i>           | KAH7375300.1                      |
| chalcone and stilbene synthase domain-containing protein       | 439  | 0         | 100%       | 75.45%     | <i>Plectosphaerella cucumerina</i>           | KAH7375301.1                      |
| apoptosis-antagonizing transcription factor                    | 539  | 2.00E-166 | 100%       | 59.70%     | <i>Plectosphaerella cucumerina</i>           | KAH7375290.1                      |
| fungal specific transcription factor domain-containing protein | 578  | 0         | 100%       | 72.90%     | <i>Colletotrichum incanum</i>                | KZL80546.1                        |
| Feruloyl esterase B                                            | 137  | 3.00E-32  | 91%        | 50.00%     | <i>Colletotrichum trifolii</i>               | TDZ44944.1                        |
| oxidoreductase                                                 | 451  | 0         | 99%        | 64.59%     | <i>Plectosphaerella plurivora</i>            | KAH6681205.1                      |
| Acetyltransferase                                              | 273  | 1.00E-145 | 86%        | 82.70%     | <i>Colletotrichum higginsianum</i><br>349063 | XP_018159255.1                    |
| carbonic anhydrase                                             | 271  | 2.00E-142 | 93%        | 74.41%     | <i>Colletotrichum incanum</i>                | KZL87566.1                        |

**101) *Verticillium nubilum* contig\_ NMXI01000015, VPKS-I-4 cluster**

| Gene name                                                | Size | E value   | % Coverage | % identity | Top blast hit                      | Accession number of top blast hit |
|----------------------------------------------------------|------|-----------|------------|------------|------------------------------------|-----------------------------------|
| hypothetical protein F5X68DRAFT_175070                   | 212  | 9.00E-136 | 97%        | 89.37%     | <i>Plectosphaerella plurivora</i>  | KAH6672776.1                      |
| quinone oxidoreductase                                   | 335  | 1.00E-130 | 100%       | 69.35%     | <i>Plectosphaerella cucumerina</i> | KAH7353556.1                      |
| hypothetical protein F5X68DRAFT_264742                   | 1823 | 0         | 99%        | 67.93%     | <i>Plectosphaerella plurivora</i>  | KAH6672778.1                      |
| biotrophy-associated secreted protein 2                  | 168  | 9.00E-33  | 98%        | 57.71%     | <i>Colletotrichum truncatum</i>    | XP_036577822.1                    |
| uncharacterized protein KVR01_013856                     | 359  | 0         | 100%       | 70.75%     | <i>Diaporthe batatas</i>           | XP_044637156.1                    |
| MFS general substrate transporter                        | 599  | 0         | 98%        | 67.68%     | <i>Diaporthe batatas</i>           | XP_044637161.1                    |
| hypothetical protein F4775DRAFT_593279                   | 3987 | 0         | 99%        | 58.01%     | <i>Biscogniauxia sp. FL1348</i>    | KAI0597589.1                      |
| bacterial alpha-L-rhamnosidase-domain-containing protein | 869  | 4.00E-36  | 19%        | 66.67%     | <i>Plectosphaerella cucumerina</i> | KAH7347261.1                      |
| secreted protein                                         | 972  | 0         | 100%       | 69.20%     | <i>Plectosphaerella cucumerina</i> | KAH7353831.1                      |
| Clp1 protein                                             | 469  | 0         | 93%        | 69.25%     | <i>Sodiomyces alkalinus F11</i>    | XP_028469991.1                    |
| Plasma membrane proteolipid 3 like protein               | 151  | 2.00E-63  | 100%       | 67.09%     | <i>Plectosphaerella cucumerina</i> | KAH7353829.1                      |
| Argonaute-binding protein 1                              | 473  | 9.00E-127 | 78%        | 48.94%     | <i>Sodiomyces alkalinus F11</i>    | XP_028469989.1                    |
| inositol polyphosphate multikinase                       | 394  | 6.00E-172 | 96%        | 65.10%     | <i>Colletotrichum tofieldiae</i>   | GKT61693.1                        |
| Pre-mRNA-splicing factor ATP-dependent R helicase prp22  | 1188 | 0         | 99%        | 85.65%     | <i>Colletotrichum siamense</i>     | KAF4842091.1                      |
| HAD-superfamily hydrolase                                | 371  | 4.00E-154 | 98%        | 62.47%     | <i>Whalleya microplaca</i>         | KAI1081230.1                      |

**102) *Verticillium tricorpus* contig\_ JPET01000002, VRPKS-I-17 cluster**

| Gene name                                    | Size | E value   | % Coverage | % identity | Top blast hit                            | Accession number of top blast hit |
|----------------------------------------------|------|-----------|------------|------------|------------------------------------------|-----------------------------------|
| Pet127-domain-containing protein             | 133  | 7.00E-37  | 89%        | 57.14%     | <i>Sodiomyces alkalinus F11</i>          | XP_028466993.1                    |
| splicing factor 3b subunit 4                 | 372  | 2.00E-150 | 85%        | 79.87%     | <i>Colletotrichum camelliae</i>          | KAH0444958.1                      |
| Mitochondrial FAD carrier protein FLX1       | 310  | 1.00E-168 | 99%        | 73.99%     | <i>Colletotrichum chlorophyti</i>        | OLN84903.1                        |
| Asparagine-rich zinc finger protein          | 447  | 3.00E-121 | 94%        | 50.00%     | <i>Colletotrichum gloeosporioides 23</i> | KAH9241535.1                      |
| Urm1-domain-containing protein               | 104  | 2.00E-56  | 96%        | 80.00%     | <i>Xylaria curta</i>                     | KAI0546841.1                      |
| elongator protein 2                          | 840  | 0.00%     | 99%        | 67.10%     | <i>Colletotrichum truncatum</i>          | XP_036582858.1                    |
| Lovastatin diketide synthase LovF 16         | 2468 | 0         | 92%        | 71.98%     | <i>Colletotrichum chlorophyti</i>        | OLN86478.1                        |
| hypothetical protein                         | 255  | 8.00E-148 | 100%       | 80.08%     | <i>Colletotrichum sojae</i>              | KAF6806434.1                      |
| ABC transporter                              | 1482 | 0         | 84%        | 71.01%     | <i>Colletotrichum scovillei</i>          | KAG7055337.1                      |
| Actin                                        | 375  | 0         | 100%       | 100.00%    | <i>Tolypocladium paradoxum</i>           | POR36442.1                        |
| 54S ribosomal protein L7                     | 356  | 0         | 98%        | 75.57%     | <i>Sodiomyces alkalinus F11</i>          | XP_028466988.1                    |
| nucleotide exchange factor Fes1              | 209  | 1.00E-95  | 97%        | 71.08%     | <i>Sodiomyces alkalinus F11</i>          | XP_028466987.1                    |
| ubiquitin C-terminal hydrolase               | 800  | 0         | 100%       | 63.55%     | <i>Plectosphaerella cucumerina</i>       | KAH7363099.1                      |
| 6-phosphofructo-2-kinase                     | 570  | 0.00%     | 100%       | 84.78%     | <i>Plectosphaerella cucumerina</i>       | KAH7363100.1                      |
| mitochondrial import receptor subunit tom-40 | 352  | 0         | 100%       | 83.33%     | <i>Sodiomyces alkalinus F11</i>          | XP_028466992.1                    |
| isoflavone reductase                         | 204  | 3.00E-18  | 92%        | 54.46%     | <i>Colletotrichum sojae</i>              | KAF6819729.1                      |

**103) *Verticillium tricorpus* contig\_ JPET01000002, VRPKS-I-14 cluster**

| Gene name                                               | Size | E value   | % Coverage | % identity | Top blast hit                      | Accession number of top blast hit |
|---------------------------------------------------------|------|-----------|------------|------------|------------------------------------|-----------------------------------|
| hypothetical protein E8E14_009652                       | 900  | 5.00E-142 | 84%        | 38.36%     | <i>Neopestalotiopsis sp. 37M</i>   | KAF3020162.1                      |
| cytochrome P450 CYP4/CYP19/CYP26 subfamilies protein    | 519  | 0.00%     | 95%        | 77.98%     | <i>Colletotrichum karsti</i>       | XP_038744559.1                    |
| hypothetical protein FPCIR_5538                         | 607  | 1.00E-127 | 93%        | 41.19%     | <i>Fusarium pseudocircinatum</i>   | KAF5592855.1                      |
| Acyl-CoA dehydrogenase/oxidase                          | 505  | 8.00E-150 | 91%        | 52.93%     | <i>Cordyceps javanica</i>          | TQV95615.1                        |
| fatty acid desaturase domain-containing protein         | 577  | 0.00%     | 100%       | 60.33%     | <i>Sarocladium implicatum</i>      | KAH8177350.1                      |
| putative polyketide synthase                            | 3161 | 0         | 100%       | 57.90%     | <i>Truncatella angustata</i>       | XP_045957259.1                    |
| major facilitator superfamily domain-containing protein | 586  | 0         | 84%        | 61.68%     | <i>Truncatella angustata</i>       | XP_045957260.1                    |
| cytochrome P450                                         | 509  | 0         | 100%       | 79.45%     | <i>Plectosphaerella cucumerina</i> | KAH7367666.1                      |
| hypothetical protein CEP53_002056                       | 374  | 9.00E-149 | 93%        | 71.63%     | <i>Fusarium sp. AF-6</i>           | RSL69861.1                        |

|                                        |     |           |      |        |                                              |                |
|----------------------------------------|-----|-----------|------|--------|----------------------------------------------|----------------|
| hypothetical protein B0T11DRAFT_56928  | 204 | 1.00E-100 | 100% | 72.46% | <i>Plectosphaerella cucumerina</i>           | KAH7367670.1   |
| hypothetical protein B0T11DRAFT_350760 | 560 | 0         | 99%  | 86.94% | <i>Plectosphaerella cucumerina</i>           | KAH7369187.1   |
| Protein rds1 like protein              | 465 | 0         | 98%  | 80.57% | <i>Sodiomyces alkalinus F11</i>              | XP_028471380.1 |
| FK506-binding protein 2                | 194 | 8.00E-82  | 100% | 69.59% | <i>Colletotrichum orbiculare MAFF 240422</i> | TDZ17824.1     |
| hypothetical protein HYQ45_016732      | 88  | 2.00E-04  | 100% | 72.53% | <i>Verticillium longisporum</i>              | KAG7113540.1   |
| hypothetical protein FALBO_210         | 142 | 2.00E-70  | 100% | 73.24% | <i>Fusarium albosuccineum</i>                | KAF4472888.1   |
| hypothetical protein F5883DRAFT_436293 | 936 | 0         | 99%  | 71.46% | <i>Diaporthaceae sp. PMI_573</i>             | KAH8748597.1   |

**104) *Verticillium tricorpus* contig\_ JPET01000001, VRPKS-I-16 cluster**

| Gene name                                                                                         | Size | E value   | % Coverage | % identity | Top blast hit                         | Accession number of top blast hit |
|---------------------------------------------------------------------------------------------------|------|-----------|------------|------------|---------------------------------------|-----------------------------------|
| hypothetical protein B0T11DRAFT_7516                                                              | 205  | 5.00E-49  | 64%        | 69.92%     | <i>Plectosphaerella cucumerina</i>    | KAH7375254.1                      |
| choline/ethanolaminephosphotransferase                                                            | 427  | 0         | 92%        | 82.37%     | <i>Sodiomyces alkalinus F11</i>       | XP_028462783.1                    |
| estradiol 17-beta-dehydrogenase                                                                   | 282  | 3.00E-120 | 100%       | 65.60%     | <i>Colletotrichum tofieldiae</i>      | KZL75089.1                        |
| glutaminyl-peptide cyclotransferase                                                               | 388  | 0         | 100%       | 72.89%     | <i>Sodiomyces alkalinus F11</i>       | XP_028462781.1                    |
| Dolichyl-diphosphooligosaccharide--protein glycosyltransferase subunit SWP1                       | 287  | 2.00E-91  | 99%        | 58.19%     | <i>Colletotrichum sidae</i>           | TEA10577.1                        |
| hypothetical protein HYQ44_009310                                                                 | 162  | 1.00E-25  | 77%        | 63.08%     | <i>Verticillium longisporum</i>       | KAG7111115.1                      |
| xylosidase/arabinosidase                                                                          | 599  | 0         | 100%       | 90.82%     | <i>Plectosphaerella plurivora</i>     | KAH6670864.1                      |
| flavin depend monooxygenase that catalyses the oxidation of rubrofusarin to 9-hydroxyrubrofusarin | 523  | 0         | 100%       | 78.29%     | <i>Fusarium albosuccineum</i>         | KAF4463211.1                      |
| hypothetical protein CEP51_004340                                                                 | 167  | 3.00E-62  | 100%       | 62.28%     | <i>Fusarium floridanum</i>            | RSL83703.1                        |
| Alpha/Beta hydrolase protein                                                                      | 557  | 0         | 93%        | 66.60%     | <i>Plectosphaerella plurivora</i>     | KAH6688446.1                      |
| putative polyketide synthase                                                                      | 2599 | 0         | 99%        | 72.03%     | <i>Plectosphaerella cucumerina</i>    | KAH7369281.1                      |
| serine hydrolase FSH                                                                              | 239  | 7.00E-81  | 100%       | 56.33%     | <i>Plectosphaerella plurivora</i>     | KAH6673998.1                      |
| uncharacterized protein GCG54_00000013                                                            | 638  | 0         | 94%        | 64.82%     | <i>Colletotrichum gloeosporioides</i> | XP_045266644.1                    |
| hypothetical protein B0T11DRAFT_249503                                                            | 1066 | 0.00%     | 100%       | 58.96%     | <i>Plectosphaerella cucumerina</i>    | KAH7375266.1                      |
| RNA recognition domain-containing protein                                                         | 155  | 5.00E-62  | 83%        | 77.69%     | <i>Colletotrichum sojae</i>           | KAF6816001.1                      |
| hypothetical protein F5X68DRAFT_6871                                                              | 1669 | 0         | 97%        | 59.17%     | <i>Plectosphaerella plurivora</i>     | KAH6687842.1                      |
| subtilase                                                                                         | 859  | 0         | 97%        | 69.29%     | <i>Plectosphaerella plurivora</i>     | KAH6687843.1                      |
| Sorting nexin-4                                                                                   | 475  | 0         | 100%       | 79.88%     | <i>Plectosphaerella plurivora</i>     | KAH6687844.1                      |
| mitochondrial distribution and morphology protein                                                 | 542  | 0         | 94%        | 76.37%     | <i>Plectosphaerella plurivora</i>     | KAH6687845.1                      |
| adenylate kinase                                                                                  | 268  | 8.00E-155 | 99%        | 80.97%     | <i>Colletotrichum karsti</i>          | XP_038745165.1                    |



**105) *Verticillium tricorpus* contig\_ JPET01000001, VRPKS-I-25 cluster**

| Gene name                                                          | Size | E value   | % Coverage | % identity | Top blast hit                           | Accession number of top blast hit |
|--------------------------------------------------------------------|------|-----------|------------|------------|-----------------------------------------|-----------------------------------|
| hypothetical protein B0T11DRAFT_325269                             | 436  | 1.00E-116 | 100%       | 51.56%     | <i>Plectosphaerella cucumerina</i>      | KAH7366966.1                      |
| hypothetical protein B0T11DRAFT_49340                              | 356  | 9.00E-114 | 91%        | 60.07%     | <i>Plectosphaerella cucumerina</i>      | KAH7366962.1                      |
| mediator complex, subunit Med18                                    | 269  | 2.00E-164 | 99%        | 80.07%     | <i>Plectosphaerella cucumerina</i>      | KAH7347312.1                      |
| bifunctional polynucleotide phosphatase/kinase                     | 455  | 0         | 99%        | 67.17%     | <i>Sodiomyces alkalinus F11</i>         | XP_028468241.1                    |
| calcium-transporting ATPase                                        | 1071 | 0         | 98%        | 74.39%     | <i>Monosporascus sp. MG133</i>          | RYP34097.1                        |
| Protein STB5-like protein 3                                        | 771  | 0         | 88%        | 61.36%     | <i>Colletotrichum chlorophyti</i>       | OLN81943.1                        |
| Thiol-specific monooxygenase like protein [                        | 492  | 0         | 100%       | 67.14%     | <i>Colletotrichum fruticola</i>         | XP_031891081.1                    |
| hypothetical protein                                               | 530  | 8.00E-170 | 87%        | 57.91%     | <i>Colletotrichum incanum</i>           | KZL63649.1                        |
| Non-reducing end alpha-L-arabinofuranosidase BoGH43A               | 603  | 0         | 95%        | 84.90%     | <i>Colletotrichum siamense</i>          | XP_036494585.1                    |
| polyketide synthase                                                | 2358 | 0         | 99%        | 89.27%     | <i>Stachybotrys chartarum IBT 40293</i> | KFA46917.1                        |
| short chain dehydrogenase                                          | 304  | 0         | 98%        | 91.33%     | <i>Stachybotrys chartarum IBT 7711</i>  | KEY68921.1                        |
| dihydroxy-acid dehydratase                                         | 616  | 0         | 99%        | 82.04%     | <i>Plectosphaerella plurivora</i>       | KAH6671001.1                      |
| S-adenosyl-L-methionine-dependent methyltransferase                | 313  | 1.00E-155 | 92%        | 81.10%     | <i>Sodiomyces alkalinus F11</i>         | XP_028466391.1                    |
| hypothetical protein SODALDRAFT_165672                             | 372  | 2.00E-37  | 88%        | 40.44%     | <i>Sodiomyces alkalinus F11</i>         | XP_028466392.1                    |
| hypothetical protein CFIO01_00827                                  | 673  | 8.00E-149 | 92%        | 49.61%     | <i>Colletotrichum fiorinae PJ7</i>      | EXF83685.1                        |
| unnamed protein product                                            | 187  | 2.00E-90  | 99%        | 64.17%     | <i>Clonostachys solani</i>              | CAH0054579.1                      |
| glucosidase II beta subunit-like protein-domain-containing protein | 524  | 0         | 95%        | 63.42%     | <i>Plectosphaerella plurivora</i>       | KAH6680057.1                      |
| hypothetical protein                                               | 749  | 0         | 92%        | 64.30%     | <i>Plectosphaerella plurivora</i>       | KAH6680056.1                      |

**106) *Verticillium tricorpus* contig\_ JPET01000001, VRPKS-I-19 cluster**

| Gene name                              | Size | E value  | % Coverage | % identity | Top blast hit                            | Accession number of top blast hit |
|----------------------------------------|------|----------|------------|------------|------------------------------------------|-----------------------------------|
| Alpha-glucosides permease MPH3         | 542  | 0        | 99%        | 74.68%     | <i>Cylindrodendrum hubeiense</i>         | KAF7546071.1                      |
| hypothetical protein SODALDRAFT_333514 | 77   | 2.00E-22 | 97%        | 57.69%     | <i>Sodiomyces alkalinus F11</i>          | XP_028465568.1                    |
| hypothetical protein ACRE_064810       | 279  | 2.00E-76 | 98%        | 49.47%     | <i>Acremonium chrysogenum ATCC 11550</i> | KFH42767.1                        |
| N-glycosidase like protein             | 198  | 3.00E-56 | 80%        | 58.12%     | <i>Plectosphaerella cucumerina</i>       | KAH7347667.1                      |

|                                                                 |      |           |      |        |                                               |                |
|-----------------------------------------------------------------|------|-----------|------|--------|-----------------------------------------------|----------------|
| TIM44 subunit of mitochondria import inner membrane translocase | 541  | 0         | 100% | 76.10% | <i>Sodiomyces alkalinus F11</i>               | XP_028468965.1 |
| mitochondrial ribosomal protein subunit s18                     | 250  | 2.00E-90  | 100% | 56.00% | <i>Colletotrichum fiorinae PJ7</i>            | EXF75199.1     |
| DeSI-like protein sdu1                                          | 236  | 1.00E-113 | 99%  | 75.21% | <i>Colletotrichum chlorophyti</i>             | OLN97068.1     |
| Obg-like ATPase 1                                               | 394  | 0         | 100% | 90.36% | <i>Pyricularia grisea</i>                     | XP_030984371.1 |
| exopolysaccharuronase                                           | 461  | 0         | 98%  | 69.44% | <i>Monosporascus sp. mg162</i>                | RYP54678.1     |
| hypothetical protein F5882DRAFT_368496                          | 392  | 2.00E-51  | 85%  | 31.40% | <i>Hyaloscypha sp. PMI_1271</i>               | KAH8752665.1   |
| hypothetical protein AK830_g4742                                | 500  | 3.00E-68  | 83%  | 38.67% | <i>Neonectria ditissima</i>                   | KPM41855.1     |
| thioredoxin-like protein                                        | 219  | 5.00E-76  | 67%  | 76.19% | <i>Hypoxyton sp. FL0890</i>                   | KAI0834638.1   |
| MFS general substrate transporter                               | 574  | 0         | 89%  | 75.43% | <i>Sodiomyces alkalinus F11</i>               | XP_028468956.1 |
| hypothetical protein J1614_005793                               | 317  | 4.00E-107 | 95%  | 57.76% | <i>Leptosphaeria biglobosa</i>                | KAH9873395.1   |
| Type I Polyketide synthase                                      | 2176 | 0         | 99%  | 78.03% | <i>Leptosphaeria biglobosa</i>                | KAH9873394.1   |
| Ketose-bisphosphate aldolase class-ii family protein            | 1133 | 0         | 99%  | 73.21% | <i>Colletotrichum higginsianum IMI 349063</i> | XP_018154864.1 |
| uncharacterized protein CkaCkLH20_03768                         | 1135 | 0         | 100% | 67.57% | <i>Colletotrichum karsti</i>                  | XP_038748329.1 |
| Cytochrome monooxygenase like protein                           | 98   | 1.00E-08  | 70%  | 43.66% | <i>Fusarium austroafricanum</i>               | KAF4441573.1   |
| cutinase-2                                                      | 224  | 8.00E-132 | 92%  | 88.41% | <i>Plectosphaerella cucumerina</i>            | KAH7368196.1   |
| probable beta-glucosidase precursor                             | 832  | 0         | 99%  | 67.55% | <i>Aspergillus sydowii CBS 593.65</i>         | XP_040708017.1 |
| uncharacterized protein FRV6_15384                              | 281  | 8.00E-65  | 97%  | 45.13% | <i>Fusarium oxysporum</i>                     | SCO91256.1     |
| vacuolar protein sorting-associated protein                     | 435  | 6.00E-163 | 98%  | 72.98% | <i>Plectosphaerella cucumerina</i>            | KAH7368195.1   |

**107) *Verticillium tricorpus* contig\_ JPET01000003, VRPKS-I-13 cluster**

| Gene name                             | Size | E value   | % Coverage | % identity | Top blast hit                         | Accession number of top blast hit |
|---------------------------------------|------|-----------|------------|------------|---------------------------------------|-----------------------------------|
| hypothetical protein F5X68DRAFT_47703 | 256  | 5.00E-64  | 89%        | 48.25%     | <i>Plectosphaerella plurivora</i>     | KAH6693919.1                      |
| hypothetical protein B0T11DRAFT_86728 | 557  | 0         | 99%        | 63.55%     | <i>Plectosphaerella cucumerina</i>    | KAH7362695.1                      |
| 2OG-Fe oxygenase superfamily protein  | 332  | 1.00E-159 | 98%        | 72.40%     | <i>Colletotrichum nymphaeae SA-01</i> | KXH44953.1                        |
| Uracil permease                       | 525  | 0         | 94%        | 81.89%     | <i>Colletotrichum camelliae</i>       | KAH0420306.1                      |
| hypothetical protein FALBO_5956       | 314  | 0         | 100%       | 86.31%     | <i>Fusarium albosuccineum</i>         | KAF4467173.1                      |
| polyketide synthase                   | 3209 | 0         | 99%        | 55.19%     | <i>Fusarium avenaceum</i>             | KIL85244.1                        |
| hypothetical protein HBH70_059960     | 236  | 5.00E-33  | 86%        | 69.95%     | <i>Parastagonospora nodorum</i>       | KAH5143667.1                      |
| endo-1,4-beta-glucanase               | 297  | 6.00E-97  | 81%        | 60.82%     | <i>Colletotrichum sojae</i>           | KAF6788143.1                      |
| epoxide hydrolase                     | 409  | 0         | 98%        | 62.94%     | <i>Plectosphaerella plurivora</i>     | KAH6662678.1                      |
| hypothetical protein SODALDRAFT_4980  | 221  | 3.00E-60  | 81%        | 60.22%     | <i>Sodiomyces alkalinus F11</i>       | XP_028469806.1                    |

**108) *Verticillium tricorpus* contig\_ JPET01000004, VRPKS-I-26 cluster**

| Gene name                                                      | Size | E value   | % Coverage | % identity | Top blast hit                          | Accession number of top blast hit |
|----------------------------------------------------------------|------|-----------|------------|------------|----------------------------------------|-----------------------------------|
| hypothetical protein SODALDRAFT_319240                         | 134  | 4.00E-25  | 95%        | 39.39%     | <i>Sodiomyces alkalinus F11</i>        | XP_028470409.1                    |
| alpha-l-rhamnosidase                                           | 898  | 0         | 97%        | 68.71%     | <i>Colletotrichum truncatum</i>        | XP_036586343.1                    |
| hypothetical protein                                           | 427  | 2.00E-137 | 77%        | 58.86%     | <i>Trichoderma arundinaceum</i>        | RFU78228.1                        |
| FAD-dependent monooxygenase                                    | 452  | 0         | 96%        | 84.70%     | <i>Stachybotrys elegans</i>            | KAH7303249.1                      |
| heterokaryon incompatibility protein-domain-containing protein | 742  | 0         | 100%       | 75.88%     | <i>Chaetomium sp. MPI-CAGE-AT-0009</i> | KAH6847694.1                      |
| peptidase family M28                                           | 347  | 0         | 91%        | 77.71%     | <i>Dactylonectria estremocensis</i>    | KAH7144232.1                      |
| retinol dehydrogenase                                          | 312  | 0         | 100%       | 78.21%     | <i>Plectosphaerella cucumerina</i>     | KAH7369374.1                      |
| TTL domain-containing protein                                  | 473  | 0         | 100%       | 73.03%     | <i>Coniochaeta sp. 2T2.1</i>           | KAB5518934.1                      |
| Whalleya microplaca                                            | 2350 | 52.66%    | 0          | 2459       | 2375                                   |                                   |
| uncharacterized protein KVR01_004169                           | 224  | 2.00E-05  | 25%        | 43.86%     | <i>Diaporthe batatas</i>               | XP_044646333.1                    |
| hypothetical protein B0T11DRAFT_318355                         | 163  | 4.00E-57  | 98%        | 67.68%     | <i>Plectosphaerella cucumerina</i>     | KAH7362742.1                      |
| hypothetical protein                                           | 1004 | 0         | 100%       | 72.57%     | <i>Plectosphaerella cucumerina</i>     | KAH7362743.1                      |

**109) *Verticillium tricorpus* contig\_ JPET01000006, VRPKS-I-20 cluster**

| Gene name                                                            | Size | E value   | % Coverage | % identity | Top blast hit                         | Accession number of top blast hit |
|----------------------------------------------------------------------|------|-----------|------------|------------|---------------------------------------|-----------------------------------|
| SUMO-activating enzyme subunit uba-2                                 | 353  | 4.00E-153 | 93%        | 73.03%     | <i>Sodiomyces alkalinus F11</i>       | XP_028470156.1                    |
| hypothetical protein                                                 | 309  | 7.00E-98  | 99%        | 62.66%     | <i>Plectosphaerella cucumerina</i>    | KAH7347695.1                      |
| feruloyl esterase b                                                  | 315  | 1.00E-176 | 93%        | 79.52%     | <i>Colletotrichum musicola</i>        | KAF6811137.1                      |
| long-chain base protein                                              | 554  | 0         | 100%       | 70.97%     | <i>Plectosphaerella cucumerina</i>    | KAH7347694.1                      |
| uncharacterized protein                                              | 1723 | 0         | 64%        | 65.16%     | <i>Colletotrichum sublineola</i>      | KDN67348.1                        |
| mannan endo-1,4-beta-mannosidase                                     | 401  | 0         | 95%        | 82.55%     | <i>Plectosphaerella plurivora</i>     | KAH6695781.1                      |
| bifunctional p-450-like protein                                      | 1076 | 0         | 100%       | 75.37%     | <i>Colletotrichum truncatum</i>       | XP_036579478.1                    |
| polyketide synthase                                                  | 2475 | 0         | 99%        | 67.08%     | <i>Penicillium arizonense</i>         | XP_022486633.1                    |
| Alpha-ketoglutarate-dependent 2,4-dichlorophenoxyacetate dioxygenase | 327  | 2.00E-174 | 98%        | 68.28%     | <i>Penicillium arizonense</i>         | XP_022486531.1                    |
| Cytochrome P450 4V2                                                  | 763  | 0         | 67%        | 65.78%     | <i>Penicillium arizonense</i>         | XP_022486670.1                    |
| unnamed protein product                                              | 525  | 0         | 96%        | 55.47%     | <i>Akanthomyces lecanii RCEF 1005</i> | OAA79799.1                        |
| hypothetical protein FALBO_6676                                      | 100  | 5.00E-18  | 98%        | 43.88%     | <i>Fusarium albosuccineum</i>         | KAF4466462.1                      |
| hypothetical protein                                                 | 906  | 0         | 63%        | 70.05%     | <i>Plectosphaerella cucumerina</i>    | KAH7374727.1                      |
| hypothetical protein B0J13DRAFT_486524                               | 254  | 2.00E-134 | 100%       | 74.02%     | <i>Dactylonectria estremocensis</i>   | KAH7119443.1                      |
| uncharacterized protein TRUGW13939_09250                             | 346  | 0         | 99%        | 74.13%     | <i>Talaromyces rugulosus</i>          | XP_035348268.1                    |

|                                           |      |   |     |        |                                |              |
|-------------------------------------------|------|---|-----|--------|--------------------------------|--------------|
| hypothetical protein<br>EDB80DRAFT_562441 | 1180 | 0 | 58% | 51.94% | <i>Ilyonectria destructans</i> | KAH7018764.1 |
|-------------------------------------------|------|---|-----|--------|--------------------------------|--------------|

**110) *Verticillium tricorpus* contig\_ JPET01000004, PKS-III cluster**

| Gene name                                                         | Size | E value   | % Coverage | % identity | Top blast hit                                 | Accession number of top blast hit |
|-------------------------------------------------------------------|------|-----------|------------|------------|-----------------------------------------------|-----------------------------------|
| NADH-ubiquinone oxidoreductase 30.4 kDa subunit                   | 336  | 1.00E-49  | 75%        | 50.19%     | <i>Plectosphaerella cucumerina</i>            | KAH7375303.1                      |
| short chain dehydrogenase                                         | 301  | 3.00E-165 | 96%        | 76.63%     | <i>Sodiomyces alkalinus F11</i>               | XP_028470310.1                    |
| hypothetical protein                                              | 189  | 2.00E-88  | 98%        | 68.09%     | <i>Sodiomyces alkalinus F11</i>               | XP_028470317.1                    |
| hypothetical protein                                              | 290  | 4.00E-166 | 94%        | 79.56%     | <i>Ilyonectria destructans</i>                | KAH7019330.1                      |
| Splicing factor spf30                                             | 303  | 4.00E-114 | 99%        | 69.38%     | <i>Colletotrichum truncatum</i>               | XP_036586172.1                    |
| hypothetical protein<br>B0T11DRAFT_249550                         | 599  | 1.00E-160 | 96%        | 59.33%     | <i>Plectosphaerella cucumerina</i>            | KAH7375296.1                      |
| putative mitochondrial 2-oxoglutarate/malate carrier protein      | 335  | 0         | 100%       | 86.87%     | <i>Colletotrichum chlorophyti</i>             | OLN95994.1                        |
| uncharacterized protein D7B24_007593                              | 549  | 0         | 98%        | 67.68%     | <i>Verticillium nonalfalfae</i>               | XP_028494368.1                    |
| PAB-dependent poly -specific ribonuclease subunit PAN2            | 1062 | 0         | 98%        | 78.66%     | <i>Plectosphaerella cucumerina</i>            | KAH7375292.1                      |
| fructose-bisphosphate aldolase                                    | 362  | 0         | 100%       | 94.48%     | <i>Verticillium alfalfae VaMs.102</i>         | XP_003000775.1                    |
| putative chalcone and stilbene synthase domain-containing protein | 444  | 0         | 100%       | 73.65%     | <i>Colletotrichum sublineola</i>              | KDN65911.1                        |
| hypothetical protein<br>K456DRAFT_1765144                         | 127  | 3.00E-19  | 86%        | 58.93%     | <i>Colletotrichum gloeosporioides 23</i>      | KAH9228351.1                      |
| TRAUB-domain-containing protein                                   | 594  | 5.00E-121 | 83%        | 71.43%     | <i>Sodiomyces alkalinus F11</i>               | XP_028470322.1                    |
| Transcriptional activator protein acu-15                          | 806  | 0         | 100%       | 72.75%     | <i>Colletotrichum higginsianum</i>            | TID06918.1                        |
| Feruloyl esterase B                                               | 294  | 2.00E-153 | 94%        | 74.55%     | <i>Colletotrichum orbiculare MAFF 240422</i>  | TDZ25527.1                        |
| oxidoreductase                                                    | 451  | 0         | 99%        | 65.11%     | <i>Plectosphaerella plurivora</i>             | KAH6681205.1                      |
| Acetyltransferase                                                 | 269  | 4.00E-148 | 88%        | 83.54%     | <i>Colletotrichum higginsianum IMI 349063</i> | XP_018159255.1                    |
| carbonic anhydrase                                                | 271  | 1.00E-145 | 93%        | 76.38%     | <i>Colletotrichum incanum</i>                 | KZL87566.1                        |
| hypothetical protein                                              | 289  | 2.00E-54  | 65%        | 52.91%     | <i>Colletotrichum incanum</i>                 | OHW90569.1                        |
| hypothetical protein<br>B0T11DRAFT_143288                         | 221  | 2.00E-82  | 88%        | 59.69%     | <i>Plectosphaerella cucumerina</i>            | KAH7347634.1                      |
| alpha-ketoglutarate-dependent sulfonate dioxygenase               | 378  | 0         | 100%       | 83.60%     | <i>Plectosphaerella plurivora</i>             | KAH6681182.1                      |

**111) *Verticillium tricorpus* contig\_ JPET01000002, VRPKS-I-23 cluster**

| Gene name                               | Size | E value   | % Coverage | % identity | Top blast hit                       | Accession number of top blast hit |
|-----------------------------------------|------|-----------|------------|------------|-------------------------------------|-----------------------------------|
| hypothetical protein SODALDRAFT_67746   | 364  | 1.00E-64  | 99%        | 38.07%     | <i>Sodiomyces alkalinus F11</i>     | XP_028463289.1                    |
| homoserine kinase                       | 359  | 2.00E-176 | 100%       | 81.62%     | <i>Plectosphaerella cucumerina</i>  | KAH7362595.1                      |
| SnodProt1                               | 138  | 8.00E-64  | 84%        | 76.72%     | <i>Plectosphaerella cucumerina</i>  | KAH7368131.1                      |
| uncharacterized protein VDAG_01853      | 129  | 3.00E-07  | 52%        | 79.49%     | <i>Verticillium dahliae VdLs.17</i> | XP_009656177.1                    |
| hypothetical protein SODALDRAFT_82915   | 851  | 0         | 96%        | 62.06%     | <i>Sodiomyces alkalinus F11</i>     | XP_028462489.1                    |
| uncharacterized protein CGCS363_v012205 | 365  | 5.00E-104 | 93%        | 51.23%     | <i>Colletotrichum siamense</i>      | XP_036491211.1                    |
| aromatic prenyltransferase              | 195  | 1.00E-68  | 70%        | 71.53%     | <i>Plectosphaerella cucumerina</i>  | KAH7358950.1                      |
| aromatic prenyltransferase              | 238  | 3.00E-89  | 94%        | 64.00%     | <i>Plectosphaerella cucumerina</i>  | KAH7358950.1                      |
| Reducing polyketide synthase            | 2346 | 0         | 99%        | 51.56%     | <i>Sodiomyces alkalinus F11</i>     | XP_028462492.1                    |
|                                         | 558  | 0         | 96%        | 52.71%     | <i>Stylonectria norvegica</i>       | KAF7555861.1                      |
| hypothetical protein                    |      |           |            |            |                                     |                                   |
| virulence sensor protein bvgS           | 1386 | 0         | 99%        | 66.88%     | <i>Plectosphaerella cucumerina</i>  | KAH7358170.1                      |
| hypothetical protein B0T11DRAFT_299362  | 191  | 1.00E-62  | 59%        | 82.30%     | <i>Plectosphaerella cucumerina</i>  | KAH7358281.1                      |
| hypothetical protein B0T11DRAFT_284115  | 230  | 1.00E-97  | 100%       | 76.09%     | <i>Plectosphaerella cucumerina</i>  | KAH7358280.1                      |
| uncharacterized protein CORC01_08067    | 323  | 3.00E-168 | 100%       | 86.69%     | <i>Colletotrichum orchidophilum</i> | XP_022473766.1                    |
| SRP54-domain-containing protein         | 668  | 0.00E+00  | 100%       | 81.04%     | <i>Sodiomyces alkalinus F11</i>     | XP_028465413.1                    |
| hypothetical protein SODALDRAFT_201001  | 1494 | 0         | 97%        | 61.28%     | <i>Sodiomyces alkalinus F11</i>     | XP_028465411.1                    |

#### 112) *Verticillium tricorpus* contig\_ JPET01000002, VRPKS-I-12 cluster

| Gene name                                  | Size | E value   | % Coverage | % identity | Top blast hit                    | Accession number of top blast hit |
|--------------------------------------------|------|-----------|------------|------------|----------------------------------|-----------------------------------|
| hypothetical protein FPOAC1_009761         | 238  | 4.00E-82  | 89%        | 58.60%     | <i>Fusarium poae</i>             | XP_044706852.1                    |
| cytochrome P450                            | 474  | 0         | 97%        | 74.36%     | <i>Sodiomyces alkalinus F11</i>  | XP_028469280.1                    |
| Beta-ketoacyl synthase                     | 366  | 1.00E-92  | 99%        | 45.26%     | <i>Tolypocladium paradoxum</i>   | POR38434.1                        |
|                                            | 432  | 7.00E-180 | 96%        | 56.25%     | <i>Colletotrichum salicis</i>    | KXH61197.1                        |
| hypothetical protein CSAL01_09615          |      |           |            |            |                                  |                                   |
| FAD/NAD -binding domain-containing protein | 426  | 0         | 93%        | 74.12%     | <i>Sodiomyces alkalinus F11</i>  | XP_028469276.1                    |
| hypothetical protein SODALDRAFT_331204     | 890  | 0         | 88%        | 70.13%     | <i>Sodiomyces alkalinus F11</i>  | XP_028469275.1                    |
| polyketide synthase                        | 3982 | 0         | 96%        | 75.43%     | <i>Sodiomyces alkalinus F11</i>  | XP_028469272.1                    |
| L-2,4-diaminobutyrate decarboxylase        | 515  | 0         | 87%        | 65.56%     | <i>Colletotrichum trifolii</i>   | TDZ67276.1                        |
| hypothetical protein                       | 388  | 4.00E-127 | 99%        | 58.99%     | <i>Colletotrichum fructicola</i> | XP_031880272.1                    |

|                                                          |      |           |      |        |                                    |                |
|----------------------------------------------------------|------|-----------|------|--------|------------------------------------|----------------|
| hypothetical protein BN1723_013595                       | 316  | 2.00E-72  | 78%  | 48.28% | <i>Verticillium longisporum</i>    | CRK25564.1     |
| laccase-like multicopper oxidase                         | 561  | 0         | 98%  | 66.79% | <i>Plectosphaerella cucumerina</i> | KAH7358155.1   |
| Conidial yellow pigment biosynthesis polyketide synthase | 2188 | 0         | 100% | 79.19% | <i>Colletotrichum karsti</i>       | XP_038751444.1 |
| hypothetical protein                                     | 325  | 0         | 99%  | 85.80% | <i>Colletotrichum truncatum</i>    | XP_036586400.1 |
| hypothetical protein                                     | 425  | 1.00E-145 | 100% | 56.02% | <i>Colletotrichum plurivorum</i>   | KAF6839547.1   |
| transcription factor Cmr1                                | 925  | 0         | 98%  | 72.32% | <i>Colletotrichum musicola</i>     | KAF6845250.1   |
| glycosyl transferase family protein                      | 325  | 9.00E-164 | 100% | 77.91% | <i>Plectosphaerella cucumerina</i> | KAH7358014.1   |
| aldolase                                                 | 245  | 8.00E-124 | 99%  | 75.31% | <i>Xylariaceae sp. FL0662B</i>     | KAI0012622.1   |

**113) *Verticillium tricorpus* contig\_ JPET01000008, VRPKS-I-9 cluster**

| Gene name                                 | Size | E value   | % Coverage | % identity | Top blast hit                           | Accession number of top blast hit |
|-------------------------------------------|------|-----------|------------|------------|-----------------------------------------|-----------------------------------|
| Phosphomevalonate kinase                  | 417  | 0         | 100%       | 65.32%     | <i>Colletotrichum shioi</i>             | TQN71383.1                        |
| ATP-dependent RNA helicase DBP7           | 768  | 0         | 100%       | 73.43%     | <i>Plectosphaerella cucumerina</i>      | KAH7376931.1                      |
| major facilitator superfamily transporter | 532  | 0         | 90%        | 78.38%     | <i>Plectosphaerella plurivora</i>       | KAH6695233.1                      |
| hypothetical protein F5Y05DRAFT_369401    | 505  | 8.00E-148 | 86%        | 54.36%     | <i>Hypoxylon sp. FL0543</i>             | KAI1142003.1                      |
| metalloprotease                           | 460  | 2.00E-133 | 45%        | 86.06%     | <i>Colletotrichum incanum</i>           | OHW96414.1                        |
| uncharacterized protein B0I36DRAFT_355828 | 145  | 5.00E-08  | 42%        | 75.81%     | <i>Microdochium trichocladiopsis</i>    | XP_046005612.1                    |
| polyketide synthase 3                     | 3971 | 0         | 99%        | 71.29%     | <i>Hirsutella rhossiliensis</i>         | XP_044717051.1                    |
| para-nitrobenzyl esterase                 | 560  | 0         | 96%        | 69.14%     | <i>Plectosphaerella cucumerina</i>      | KAH7376670.1                      |
| polysaccharide deacetylase                | 526  | 6.00E-168 | 68%        | 79.17%     | <i>Plectosphaerella cucumerina</i>      | KAH7374645.1                      |
| hypothetical protein B0T11DRAFT_318679    | 475  | 1.00E-102 | 43%        | 72.12%     | <i>Plectosphaerella cucumerina</i>      | KAH7363183.1                      |
| hypothetical protein ISF_06027            | 85   | 5.00E-21  | 75%        | 56.25%     | <i>Cordyceps fumosorosea</i> ARSEF 2679 | XP_018703129.1                    |
| tetratricopeptide repeat protein 1        | 285  | 3.00E-111 | 89%        | 80.39%     | <i>Colletotrichum karsti</i>            | XP_038750970.1                    |
| hypothetical protein                      | 270  | 2.00E-141 | 99%        | 71.17%     | <i>Thozetella sp. PMI_491</i>           | KAH8895695.1                      |
| C6 zinc finger domain-containing protein  | 705  | 0         | 100%       | 64.78%     | <i>Colletotrichum karsti</i>            | XP_038750968.1                    |

**114) *Verticillium tricorpus* contig\_ JPET01000003, VRPKS-I-2 cluster**

| Gene name | Size | E value | % Coverage | % identity | Top blast hit | Accession number of top blast hit |
|-----------|------|---------|------------|------------|---------------|-----------------------------------|
|-----------|------|---------|------------|------------|---------------|-----------------------------------|

|                                                          |      |           |      |        |                                                 |                |
|----------------------------------------------------------|------|-----------|------|--------|-------------------------------------------------|----------------|
| uncharacterized protein GCG54_00004628                   | 533  | 0         | 97%  | 60.66% | <i>Colletotrichum gloeosporioides</i>           | XP_045262617.1 |
| snare associated Golgi protein-domain-containing protein | 419  | 2.00E-136 | 78%  | 73.41% | <i>Plectosphaerella plurivora</i>               | KAH6691624.1   |
| smr domain-containing protein                            | 730  | 0         | 100% | 84.04% | <i>Colletotrichum graminicola M1.001</i>        | XP_008090428.1 |
| hypothetical protein B0T11DRAFT_85615                    | 177  | 5.00E-33  | 98%  | 44.83% | <i>Plectosphaerella cucumerina</i>              | KAH7362564.1   |
| D-isomer specific 2-hydroxyacid dehydrogenase            | 432  | 0         | 71%  | 78.46% | <i>Plectosphaerella plurivora</i>               | KAH6689062.1   |
| Major Facilitator Superfamily protein                    | 577  | 0         | 100% | 83.14% | <i>Colletotrichum fruticola</i>                 | KAF4886521.1   |
| uncharacterized protein CGMCC3_g17406                    | 167  | 4.00E-110 | 100% | 92.22% | <i>Colletotrichum fruticola</i>                 | XP_031875989.1 |
| Alpha/beta hydrolase                                     | 433  | 0         | 99%  | 84.26% | <i>Colletotrichum fruticola</i>                 | XP_031875995.1 |
| polyketide synthase                                      | 4429 | 0         | 90%  | 85.90% | <i>Colletotrichum fruticola</i>                 | KAF4886526.1   |
| uncharacterized protein CGMCC3_g17410                    | 358  | 0         | 98%  | 89.80% | <i>Colletotrichum fruticola</i>                 | XP_031875992.1 |
| hypothetical protein                                     | 508  | 0         | 100% | 72.83% | <i>Colletotrichum fruticola</i>                 | KAF4886529.1   |
| major facilitator superfamily domain-containing protein  | 712  | 0         | 78%  | 81.48% | <i>Plectosphaerella plurivora</i>               | KAH6687355.1   |
| O-methyltransferase                                      | 233  | 2.00E-111 | 100% | 70.21% | <i>Plectosphaerella plurivora</i>               | KAH6687359.1   |
| kinase-like domain-containing protein                    | 119  | 8.00E-64  | 100% | 71.43% | <i>Tolypocladium ophioglossoides CBS 100239</i> | KND87680.1     |
| hypothetical protein                                     | 882  | 0         | 53%  | 85.41% | <i>Plectosphaerella cucumerina</i>              | KAH7362562.1   |

#### 115) *Verticillium tricorpus* contig\_ JPET01000003, VRPKS-I-6 cluster

| Gene name                                 | Size | E value   | % Coverage | % identity | Top blast hit                      | Accession number of top blast hit |
|-------------------------------------------|------|-----------|------------|------------|------------------------------------|-----------------------------------|
| COX17 protein                             | 70   | 2.00E-22  | 71%        | 84.00%     | <i>Diaporthaceae sp. PMI_573</i>   | KAH8788412.1                      |
| hypothetical protein HYQ45_010318         | 159  | 3.00E-51  | 87%        | 61.87%     | <i>Verticillium longisporum</i>    | KAG7131019.1                      |
| protein PXR1                              | 365  | 2.00E-74  | 50%        | 81.94%     | <i>Plectosphaerella cucumerina</i> | KAH7368324.1                      |
| hypothetical protein CSOJ01_13003         | 489  | 0         | 94%        | 76.29%     | <i>Colletotrichum sojae</i>        | KAF6797496.1                      |
| hypothetical protein CSPAE12_03025        | 633  | 2.00E-134 | 80%        | 48.46%     | <i>Colletotrichum incanum</i>      | OHW98243.1                        |
| hypothetical protein C8035_v000460        | 324  | 4.00E-132 | 97%        | 64.17%     | <i>Colletotrichum spinosum</i>     | TDZ12713.1                        |
| hypothetical protein EDB80DRAFT_717894    | 251  | 1.00E-50  | 89%        | 44.36%     | <i>Ilyonectria destructans</i>     | KAH7006831.1                      |
| Transaldolase                             | 365  | 0         | 100%       | 87.12%     | <i>Ilyonectria destructans</i>     | KAH7006832.1                      |
| membrane transporter D1                   | 599  | 0         | 99%        | 82.58%     | <i>Ilyonectria destructans</i>     | KAH7006833.1                      |
| thioredoxin                               | 329  | 1.00E-171 | 100%       | 72.42%     | <i>Plectosphaerella plurivora</i>  | KAH6691560.1                      |
| uncharacterized protein BDZ99DRAFT_567991 | 184  | 4.00E-20  | 90%        | 31.95%     | <i>Mytilinidion resinicola</i>     | XP_033581321.1                    |

|                                                             |      |           |      |        |                                |                |
|-------------------------------------------------------------|------|-----------|------|--------|--------------------------------|----------------|
| serine hydrolase-domain-containing protein                  | 284  | 3.00E-130 | 100% | 63.38% | <i>Aspergillus avenaceus</i>   | KAE8150729.1   |
| Polyketide synthase-nonribosomal peptide synthetase         | 4028 | 0         | 99%  | 66.86% | <i>Aspergillus avenaceus</i>   | KAE8150730.1   |
| hypothetical protein CC78DRAFT_576631                       | 470  | 0         | 100% | 64.04% | <i>Didymosphaeria enalia</i>   | KAF2268082.1   |
| P-loop containing nucleoside triphosphate hydrolase protein | 1108 | 0         | 98%  | 58.55% | <i>Clohesyomyces aquaticus</i> | ORY13587.1     |
| hypothetical protein                                        | 466  | 0         | 99%  | 62.99% | <i>Didymosphaeria enalia</i>   | KAF2268085.1   |
| cytochrome P450                                             | 458  | 0         | 94%  | 66.59% | <i>Aspergillus alliaceus</i>   | XP_031905229.1 |
| putative alcohol dehydrogenase                              | 370  | 0         | 100% | 77.34% | <i>Aspergillus avenaceus</i>   | KAE8150737.1   |

**116) *Verticillium tricorpus* contig\_ JPET01000007, VRPKS-I-5 cluster**

| Gene name                                                                            | Size | E value   | % Coverage | % identity | Top blast hit                             | Accession number of top blast hit |
|--------------------------------------------------------------------------------------|------|-----------|------------|------------|-------------------------------------------|-----------------------------------|
| pseudouridine synthase [Sodiomyces alkalinus F11]                                    | 105  | 7.00E-15  | 87%        | 44.79%     | <i>Sodiomyces alkalinus F11</i>           | XP_028471325.1                    |
| GPI-GlcNAc transferase complex [Colletotrichum graminicola M1.001]                   | 222  | 3.00E-54  | 99%        | 60.62%     | <i>Colletotrichum graminicola M1.001</i>  | XP_008094050.1                    |
| hypothetical protein SODALDRAFT_41197 [Sodiomyces alkalinus F11]                     | 1644 | 0         | 96%        | 73.19%     | <i>Sodiomyces alkalinus F11</i>           | XP_028471323.1                    |
| glutathione S-transferase                                                            | 244  | 7.00E-126 | 99%        | 78.92%     | <i>fungus sp. No.14919</i>                | GAW23379.1                        |
| major facilitator superfamily-domain-containing protein [Biscogniauxia mediterranea] | 612  | 0.00E+00  | 88%        | 73.20%     | <i>Biscogniauxia mediterranea</i>         | KAI1639146.1                      |
| uncharacterized protein                                                              | 191  | 2.00E-59  | 87%        | 53.25%     | <i>Cucurbitaria berberidis CBS 394.84</i> | XP_040789151.1                    |
| hypothetical protein B0I37DRAFT_378309 [Chaetomium sp. MPI-CAGE-AT-0009]             | 505  | 2.00E-63  | 66%        | 56.88%     | <i>Chaetomium sp. MPI-CAGE-AT-0009</i>    | KAH6844803.1                      |
| putative lovastatin nonaketide synthase protein                                      | 4131 | 0.00E+00  | 96%        | 65.60%     | <i>Biscogniauxia sp. FL1348</i>           | KAI0597589.1                      |
| hypothetical protein B0T11DRAFT_333834 [Plectosphaerella cucumerina]                 | 160  | 9.00E-32  | 63%        | 64.71%     | <i>Plectosphaerella cucumerina</i>        | KAH7347765.1                      |
| Isochorismatase-like protein [Plectosphaerella plurivora]                            | 244  | 1.00E-128 | 90%        | 77.93%     | <i>Plectosphaerella plurivora</i>         | KAH6676014.1                      |
| vacuolar protein-sorting-associated protein [Plectosphaerella cucumerina]            | 228  | 4.00E-112 | 100%       | 86.40%     | <i>Plectosphaerella cucumerina</i>        | KAH7347768.1                      |
| Carboxypeptidase 2 like protein                                                      | 546  | 0         | 99%        | 77.29%     | <i>Stachybotrys chartarum IBT 40288</i>   | KFA75754.1                        |
| zinc-containing alcohol                                                              | 98   | 8.00E-54  | 100%       | 90.82%     | <i>Chaetomium sp. MPI-CAGE-AT-0009</i>    | KAH6848194.1                      |



**117) *Verticillium tricorpus* contig\_JPET01000005, VRPKS-I-17 cluster**

| Gene name                                    | Size | E value   | % Coverage | % identity | Top blast hit                               | Accession number of top blast hit |
|----------------------------------------------|------|-----------|------------|------------|---------------------------------------------|-----------------------------------|
| hypothetical protein CGLO_11330              | 334  | 1.00E-174 | 90%        | 81.19%     | <i>Colletotrichum gloeosporioides Cg-14</i> | EQB49343.1                        |
| isoflavone reductase                         | 307  | 5.00E-72  | 98%        | 48.03%     | <i>Colletotrichum musicola</i>              | KAF6837214.1                      |
| mitochondrial import receptor subunit tom-40 | 352  | 0         | 100%       | 83.33%     | <i>Sodiomyces alkalinus F11</i>             | XP_028466992.1                    |
| 6-phosphofructo-2-kinase                     | 570  | 0         | 93%        | 88.60%     | <i>Colletotrichum karsti</i>                | XP_038750648.1                    |
| ubiquitin C-terminal hydrolase               | 819  | 0         | 100%       | 65.23%     | <i>Plectosphaerella cucumerina</i>          | KAH7363099.1                      |
| 54S ribosomal protein L7                     | 356  | 0         | 98%        | 76.42%     | <i>Sodiomyces alkalinus F11</i>             | XP_028466988.1                    |
| nucleotide exchange factor Fes1              | 209  | 2.00E-96  | 97%        | 71.57%     | <i>Sodiomyces alkalinus F11</i>             | XP_028466987.1                    |
| Actin                                        | 375  | 0         | 100%       | 100.00%    | <i>Tolypocladium paradoxum</i>              | POR36442.1                        |
| ABC transporter duf341 family                | 1321 | 0         | 98%        | 68.58%     | <i>Pseudomassariella vexata</i>             | XP_040710981.1                    |
|                                              | 255  | 1.00E-148 | 100%       | 80.86%     | <i>Colletotrichum sojae</i>                 | KAF6806434.1                      |
| Lovastatin diketide synthase LovF 16         | 2277 | 0         | 99%        | 72.06%     | <i>Colletotrichum chlorophyti</i>           | OLN86478.1                        |
| hypothetical protein B0T11DRAFT_282059       | 113  | 9.00E-46  | 83%        | 75.53%     | <i>Plectosphaerella cucumerina</i>          | KAH7363092.1                      |
| elongator protein 2                          | 837  | 0         | 100%       | 67.42%     | <i>Colletotrichum tofieldiae</i>            | KZL71342.1                        |
| ubiquitin-related modifier 1                 | 104  | 4.00E-56  | 99%        | 80.58%     | <i>Cordyceps militaris CM01</i>             | XP_006668991.1                    |
| Asparagine-rich zinc finger protein          | 441  | 6.00E-125 | 93%        | 50.12%     | <i>Colletotrichum fiorinae PJ7</i>          | EXF85239.1                        |
| Mitochondrial FAD carrier protein FLX1       | 310  | 4.00E-158 | 99%        | 74.61%     | <i>Colletotrichum chlorophyti</i>           | OLN84903.1                        |
| splicing factor 3b subunit 4                 | 337  | 3.00E-153 | 94%        | 80.50%     | <i>Colletotrichum camelliae</i>             | KAH0444958.1                      |

**118) *Verticillium zaregamsianum* contig\_NMXM01000005, VRPKS-I-23 cluster**

| Gene name                              | Size | E value   | % Coverage | % identity | Top blast hit                       | Accession number of top blast hit |
|----------------------------------------|------|-----------|------------|------------|-------------------------------------|-----------------------------------|
| hypothetical protein SODALDRAFT_201001 | 2144 | 0         | 99%        | 61.19%     | <i>Sodiomyces alkalinus F11</i>     | XP_028465411.1                    |
| SRP54-domain-containing protein        | 689  | 0         | 100%       | 78.30%     | <i>Sodiomyces alkalinus F11</i>     | XP_028465413.1                    |
| uncharacterized protein CORC01_08067   | 323  | 3.00E-168 | 100%       | 86.69%     | <i>Colletotrichum orchidophilum</i> | XP_022473766.1                    |
| hypothetical protein B0T11DRAFT_284115 | 230  | 1.00E-97  | 100%       | 76.09%     | <i>Plectosphaerella cucumerina</i>  | KAH7358280.1                      |
| hypothetical protein B0T11DRAFT_299362 | 190  | 2.00E-62  | 59%        | 82.30%     | <i>Plectosphaerella cucumerina</i>  | KAH7358281.1                      |
| virulence sensor protein bvgS          | 1386 | 0         | 99%        | 66.38%     | <i>Plectosphaerella cucumerina</i>  | KAH7358170.1                      |
| drug resistance transporter            | 588  | 0         | 99%        | 69.45%     | <i>Plectosphaerella plurivora</i>   | KAH6697430.1                      |

|                                                      |      |           |      |        |                                    |                |
|------------------------------------------------------|------|-----------|------|--------|------------------------------------|----------------|
| phenolphthiocerol synthesis polyketide synthase ppsA | 2325 | 0         | 99%  | 51.93% | <i>Sodiomyces alkalinus F11</i>    | XP_028462492.1 |
| aromatic prenyltransferase                           | 456  | 0         | 100% | 68.49% | <i>Plectosphaerella cucumerina</i> | KAH7358950.1   |
| uncharacterized protein CGCS363_v012205              | 365  | 2.00E-104 | 93%  | 51.77% | <i>Colletotrichum siamense</i>     | XP_036491211.1 |
| hypothetical protein B0T11DRAFT_306916               | 372  | 2.00E-90  | 94%  | 62.89% | <i>Plectosphaerella cucumerina</i> | KAH7358952.1   |
| hypothetical protein B0T11DRAFT_355575               | 250  | 2.00E-06  | 36%  | 46.94% | <i>Plectosphaerella cucumerina</i> | KAH7358954.1   |
| SnodProt1                                            | 138  | 6.00E-67  | 100% | 71.01% | <i>Plectosphaerella cucumerina</i> | KAH7368131.1   |
| GATA zinc finger domain-containing protein 7         | 144  | 1.00E-16  | 31%  | 71.74% | <i>Colletotrichum tanacetii</i>    | TKW48536.1     |
| homoserine kinase                                    | 356  | 0         | 100% | 90.17% | <i>Plectosphaerella cucumerina</i> | KAH7362595.1   |
| hypothetical protein SODALDRAFT_67746                | 365  | 2.00E-61  | 98%  | 37.20% | <i>Sodiomyces alkalinus F11</i>    | XP_028463289.1 |
| hypothetical protein B0T11DRAFT_85809                | 195  | 7.00E-49  | 98%  | 59.28% | <i>Plectosphaerella cucumerina</i> | KAH7362593.1   |

**119) *Verticillium zaregamsianum* contig\_NMXM01000004, VRPKS-I-16 cluster**

| Gene name                                                                                         | Size | E value   | % Coverage | % identity | Top blast hit                                 | Accession number of top blast hit |
|---------------------------------------------------------------------------------------------------|------|-----------|------------|------------|-----------------------------------------------|-----------------------------------|
| hypothetical protein CEP52_001073                                                                 | 165  | 2.00E-30  | 98%        | 37.29%     | <i>Fusarium sp. AF-4</i>                      | RSM14903.1                        |
| choline/ethanolaminephosphotransferase                                                            | 427  | 0         | 92%        | 82.62%     | <i>Sodiomyces alkalinus F11</i>               | XP_028462783.1                    |
| Oxidoreductase BOA17                                                                              | 284  | 5.00E-118 | 99%        | 64.54%     | <i>Colletotrichum siamense</i>                | XP_036491827.1                    |
| glutaminyl-peptide cyclotransferase                                                               | 388  | 0         | 100%       | 73.15%     | <i>Sodiomyces alkalinus F11</i>               | XP_028462781.1                    |
| Dolichyl-diphosphooligosaccharide--protein glycosyltransferase subunit SWP1                       | 287  | 1.00E-91  | 99%        | 58.54%     | <i>Colletotrichum sidae</i>                   | TEA10577.1                        |
| uncharacterized protein D7B24_005734                                                              | 168  | 2.00E-26  | 87%        | 61.07%     | <i>Verticillium nonalfalfae</i>               | XP_028495810.1                    |
| hypothetical protein ACRE_054030                                                                  | 167  | 5.00E-62  | 99%        | 66.27%     | <i>Acremonium chrysogenum ATCC 11550</i>      | KFH43814.1                        |
| flavin depend monooxygenase that catalyses the oxidation of rubrofusarin to 9-hydroxyrubrofusarin | 523  | 0         | 100%       | 78.48%     | <i>Fusarium albosuccineum</i>                 | KAF4463211.1                      |
| xylosidase/arabinosidase                                                                          | 599  | 0         | 100%       | 90.65%     | <i>Plectosphaerella plurivora</i>             | KAH6670864.1                      |
| Alpha/Beta hydrolase protein                                                                      | 557  | 0         | 94%        | 65.91%     | <i>Plectosphaerella plurivora</i>             | KAH6688446.1                      |
| putative polyketide synthase                                                                      | 2602 | 0         | 99%        | 72.07%     | <i>Plectosphaerella cucumerina</i>            | KAH7369281.1                      |
| serine hydrolase FSH                                                                              | 239  | 3.00E-82  | 100%       | 57.14%     | <i>Plectosphaerella plurivora</i>             | KAH6673998.1                      |
| glycosyl hydrolase                                                                                | 638  | 0         | 98%        | 63.89%     | <i>Colletotrichum truncatum</i>               | XP_036587401.1                    |
| hypothetical protein B0T11DRAFT_249503                                                            | 1065 | 0         | 100%       | 59.62%     | <i>Plectosphaerella cucumerina</i>            | KAH7375266.1                      |
| RNA recognition domain-containing protein                                                         | 187  | 1.00E-64  | 72%        | 78.52%     | <i>Colletotrichum higginsianum IMI 349063</i> | XP_018158756.1                    |
| hypothetical protein SODALDRAFT_157430                                                            | 945  | 0         | 96%        | 70.59%     | <i>Sodiomyces alkalinus F11</i>               | XP_028467151.1                    |

|                                                   |     |           |      |        |                                               |                |
|---------------------------------------------------|-----|-----------|------|--------|-----------------------------------------------|----------------|
| hypothetical protein B0T11DRAFT_7649              | 691 | 1.00E-73  | 94%  | 40.34% | <i>Plectosphaerella cucumerina</i>            | KAH7375268.1   |
| subtilase                                         | 859 | 0         | 97%  | 68.69% | <i>Plectosphaerella plurivora</i>             | KAH6687843.1   |
| Sorting nexin-4 like protein                      | 475 | 0         | 100% | 80.00% | <i>Sodiomyces alkalinus F11</i>               | XP_028467149.1 |
| mitochondrial distribution and morphology protein | 542 | 0         | 94%  | 76.37% | <i>Plectosphaerella plurivora</i>             | KAH6687845.1   |
| adenylate kinase                                  | 268 | 6.00E-155 | 99%  | 80.60% | <i>Colletotrichum karsti</i>                  | XP_038745165.1 |
| short chain dehydrogenase                         | 313 | 7.00E-103 | 97%  | 55.02% | <i>Colletotrichum higginsianum IMI 349063</i> | XP_018159646.1 |

**120) *Verticillium zaregamsianum* contig\_NMXM01000004, VRPKS-I-25 cluster**

| Gene name                                            | Size | E value   | % Coverage | % identity | Top blast hit                           | Accession number of top blast hit |
|------------------------------------------------------|------|-----------|------------|------------|-----------------------------------------|-----------------------------------|
| hypothetical protein B0T11DRAFT_325269               | 567  | 1.00E-162 | 97%        | 56.36%     | <i>Plectosphaerella cucumerina</i>      | KAH7366966.1                      |
| hypothetical protein B0T11DRAFT_49340                | 354  | 2.00E-114 | 92%        | 61.07%     | <i>Plectosphaerella cucumerina</i>      | KAH7366962.1                      |
| mediator complex, subunit Med18                      | 269  | 2.00E-165 | 100%       | 80.51%     | <i>Plectosphaerella cucumerina</i>      | KAH7347312.1                      |
| hypothetical protein                                 | 451  | 0         | 99%        | 68.20%     | <i>Sodiomyces alkalinus F11</i>         | XP_028468241.1                    |
| hypothetical protein DL767_004432                    | 1071 | 0         | 98%        | 74.11%     | <i>Monosporascus sp. MG133</i>          | RYP34097.1                        |
| Protein STB5-like protein 3                          | 759  | 0         | 89%        | 62.25%     | <i>Colletotrichum chlorophyti</i>       | OLN81943.1                        |
| uncharacterized protein CGMCC3_g2624                 | 492  | 0         | 98%        | 68.18%     | <i>Colletotrichum fruticola</i>         | XP_031891081.1                    |
| hypothetical protein                                 | 528  | 2.00E-161 | 87%        | 59.19%     | <i>Colletotrichum incanum</i>           | KZL63649.1                        |
| hypothetical protein CONLIGDRAFT_699567              | 318  | 9.00E-62  | 81%        | 44.83%     | <i>Coniochaeta ligniaria NRRL 30616</i> | OIW32684.1                        |
| Non-reducing end alpha-L-arabinofuranosidase BoGH43A | 603  | 0         | 95%        | 84.38%     | <i>Colletotrichum siamense</i>          | XP_036494585.1                    |
| hypothetical protein S40293_03578                    | 2356 | 0         | 99%        | 91.30%     | <i>Stachybotrys chartarum IBT 40293</i> | KFA46917.1                        |
| hypothetical protein S7711_03850                     | 324  | 0         | 98%        | 86.25%     | <i>Stachybotrys chartarum IBT 7711</i>  | KEY68921.1                        |
| hypothetical protein S7711_03849                     | 363  | 0         | 100%       | 85.79%     | <i>Stachybotrys chartarum IBT 7711</i>  | KEY68920.1                        |
| dihydroxy-acid dehydratase                           | 627  | 0         | 99%        | 80.52%     | <i>Plectosphaerella plurivora</i>       | KAH6671001.1                      |
| S-adenosyl-L-methionine-dependent methyltransferase  | 313  | 4.00E-157 | 92%        | 81.79%     | <i>Sodiomyces alkalinus F11</i>         | XP_028466391.1                    |
| hypothetical protein SODALDRAFT_165672               | 372  | 1.00E-44  | 73%        | 45.98%     | <i>Sodiomyces alkalinus F11</i>         | XP_028466392.1                    |
| hypothetical protein CFIO01_00827                    | 673  | 3.00E-152 | 91%        | 49.07%     | <i>Colletotrichum fiorinae PJ7</i>      | EXF83685.1                        |
| hypothetical protein FDECE_5916                      | 187  | 3.00E-89  | 99%        | 66.31%     | <i>Fusarium decemcellulare</i>          | KAF5007792.1                      |

|                                                                    |      |   |     |        |                                   |              |
|--------------------------------------------------------------------|------|---|-----|--------|-----------------------------------|--------------|
| glucosidase II beta subunit-like protein-domain-containing protein | 524  | 0 | 87% | 65.97% | <i>Plectosphaerella plurivora</i> | KAH6680057.1 |
| hypothetical protein                                               | 1565 | 0 | 39% | 69.53% | <i>Plectosphaerella plurivora</i> | KAH6680056.1 |

**121) *Verticillium zaregamsianum* contig\_NMXM01000003, PKS-III cluster**

| Gene name                                                         | Size | E value   | % Coverage | % identity | Top blast hit                                 | Accession number of top blast hit |
|-------------------------------------------------------------------|------|-----------|------------|------------|-----------------------------------------------|-----------------------------------|
| hypothetical protein                                              | 289  | 1.00E-54  | 78%        | 45.11%     | <i>Colletotrichum incanum</i>                 | OHW90569.1                        |
| carbonic anhydrase                                                | 271  | 7.00E-148 | 94%        | 76.95%     | <i>Colletotrichum incanum</i>                 | KZL87566.1                        |
| Acetyltransferase                                                 | 269  | 2.00E-150 | 88%        | 84.39%     | <i>Colletotrichum higginsianum</i> IMI 349063 | XP_018159255.1                    |
| oxidoreductase                                                    | 451  | 0         | 99%        | 64.67%     | <i>Plectosphaerella plurivora</i>             | KAH6681205.1                      |
| Feruloyl esterase B                                               | 294  | 8.00E-153 | 94%        | 74.46%     | <i>Colletotrichum orbiculare</i> MAFF 240422  | TDZ25527.1                        |
| Transcriptional activator protein acu-15                          | 804  | 0         | 100%       | 72.38%     | <i>Colletotrichum higginsianum</i>            | TID06918.1                        |
| TRAUB-domain-containing protein                                   | 587  | 5.00E-139 | 79%        | 74.43%     | <i>Sodionmyces alkalinus F11</i>              | XP_028470322.1                    |
| hypothetical protein K456DRAFT_1765144                            | 127  | 2.00E-23  | 86%        | 59.82%     | <i>Colletotrichum gloeosporioides 23</i>      | KAH9228351.1                      |
| putative chalcone and stilbene synthase domain-containing protein | 444  | 0         | 100%       | 75.06%     | <i>Colletotrichum sublineola</i>              | KDN65911.1                        |
| fructose-bisphosphate aldolase                                    | 362  | 0         | 100%       | 90.06%     | <i>Plectosphaerella cucumerina</i>            | KAH7375300.1                      |
| PAB-dependent poly-specific ribonuclease subunit PAN2             | 1082 | 0         | 98%        | 79.31%     | <i>Plectosphaerella cucumerina</i>            | KAH7375292.1                      |
| uncharacterized protein D7B24_007593                              | 548  | 0         | 98%        | 67.68%     | <i>Verticillium nonalfalfae</i>               | XP_028494368.1                    |
| putative mitochondrial 2-oxoglutarate/malate carrier protein      | 335  | 0         | 100%       | 86.87%     | <i>Colletotrichum chlorophyti</i>             | OLN95994.1                        |
| hypothetical protein B0T11DRAFT_249550                            | 636  | 3.00E-179 | 96%        | 62.56%     | <i>Plectosphaerella cucumerina</i>            | KAH7375296.1                      |
| Splicing factor spf30                                             | 303  | 1.00E-114 | 99%        | 69.71%     | <i>Colletotrichum truncatum</i>               | XP_036586172.1                    |
| Iron-sulfur protein IND1                                          | 296  | 7.00E-177 | 99%        | 79.59%     | <i>Colletotrichum truncatum</i>               | XP_036586173.1                    |
| centrin-3                                                         | 189  | 8.00E-89  | 98%        | 66.31%     | <i>Plectosphaerella plurivora</i>             | KAH6681196.1                      |
| short chain dehydrogenase                                         | 301  | 1.00E-167 | 95%        | 79.02%     | <i>Sodionmyces alkalinus F11</i>              | XP_028470310.1                    |
| NADH-ubiquinone oxidoreductase 30.4 kDa subunit                   | 499  | 3.00E-52  | 81%        | 49.62%     | <i>Plectosphaerella plurivora</i>             | KAH6681192.1                      |
| hypothetical protein Cob_v001966                                  | 579  | 1.00E-84  | 78%        | 39.66%     | <i>Colletotrichum orbiculare</i> MAFF 240422  | TDZ25446.1                        |

**122) *Verticillium zaregamsianum* contig\_NMXM01000001, VRPKS-I-18 cluster**

| Gene name                                     | Size | E value   | % Coverage | % identity | Top blast hit                      | Accession number of top blast hit |
|-----------------------------------------------|------|-----------|------------|------------|------------------------------------|-----------------------------------|
| MFS general substrate transporter             | 502  | 1.00E-163 | 91%        | 52.07%     | <i>Oidiodendron maius</i> Zn       | KIN03209.1                        |
| hypothetical protein B0T11DRAFT_325103        | 254  | 3.00E-116 | 98%        | 71.43%     | <i>Plectosphaerella cucumerina</i> | KAH7366775.1                      |
| SGNH hydrolase                                | 2316 | 0         | 43%        | 56.07%     | <i>Plectosphaerella plurivora</i>  | KAH6658772.1                      |
| uncharacterized protein BU25DRAFT_464600      | 391  | 3.00E-121 | 100%       | 51.60%     | <i>Macroventuria anomochaeta</i>   | XP_033567678.1                    |
|                                               | 535  | 0         | 97%        | 80.73%     | <i>Decorospora gaudefroyi</i>      | KAF1833741.1                      |
| carbohydrate-binding module family 50 protein | 686  | 0         | 99%        | 59.10%     | <i>Plectosphaerella plurivora</i>  | KAH6684917.1                      |
| hypothetical protein B0T11DRAFT_337949        | 411  | 7.00E-93  | 90%        | 46.48%     | <i>Plectosphaerella cucumerina</i> | KAH7368878.1                      |
| Reducing polyketide synthase PKS2             | 2857 | 0         | 79%        | 77.41%     | <i>Fulvia fulva</i>                | UJO18003.1                        |
| hypothetical protein CLAFUR5_06163            | 253  | 2.00E-133 | 98%        | 78.31%     | <i>Fulvia fulva</i>                | UJO18001.1                        |
|                                               | 453  | 0         | 90%        | 67.64%     | <i>Plectosphaerella plurivora</i>  | KAH6686639.1                      |
| general substrate transporter                 | 518  | 0         | 99%        | 68.81%     | <i>Dactylonectria macrodidyma</i>  | KAH7160676.1                      |
| hypothetical protein ZTR_07120                | 526  | 0         | 98%        | 85.69%     | <i>Talaromyces verruculosus</i>    | KUL84026.1                        |
| secreted protein                              | 211  | 4.00E-93  | 90%        | 76.44%     | <i>Sodionectria alkalinus F11</i>  | XP_028465800.1                    |
| glycosyl hydrolase family 16 protein          | 425  | 1.00E-134 | 64%        | 70.80%     | <i>Colletotrichum truncatum</i>    | XP_036580125.1                    |
| Sec7 domain-containing protein                | 1558 | 0         | 97%        | 64.21%     | <i>Plectosphaerella plurivora</i>  | KAH6686645.1                      |
| hypothetical protein CFIO01_08750             | 437  | 3.00E-154 | 78%        | 65.51%     | <i>Colletotrichum fiorinae PJ7</i> | EXF74680.1                        |

### 123) *Verticillium zaregamsianum* contig\_NMXM01000001, VRPKS-I-6 cluster

| Gene name                             | Size | E value   | % Coverage | % identity | Top blast hit                      | Accession number of top blast hit |
|---------------------------------------|------|-----------|------------|------------|------------------------------------|-----------------------------------|
| COX17 protein                         | 70   | 8.00E-23  | 71%        | 86.00%     | <i>Diaporthaceae sp. PMI_573</i>   | KAH8788412.1                      |
|                                       | 159  | 4.00E-44  | 78%        | 62.40%     | <i>Verticillium longisporum</i>    | KAG7131019.1                      |
| hypothetical protein HYQ45_010318     |      |           |            |            |                                    |                                   |
| protein PXR1                          | 361  | 3.00E-72  | 49%        | 83.33%     | <i>Plectosphaerella cucumerina</i> | KAH7368324.1                      |
| MFS sugar transporter                 | 489  | 0         | 95%        | 75.05%     | <i>Colletotrichum truncatum</i>    | XP_036588620.1                    |
| hypothetical protein CSPAE12_03025    | 637  | 8.00E-133 | 80%        | 48.27%     | <i>Colletotrichum incanum</i>      | OHW98243.1                        |
| hypothetical protein C8035_v000460    | 326  | 6.00E-131 | 96%        | 64.26%     | <i>Colletotrichum spinosum</i>     | TDZ12713.1                        |
| hypothetical protein B0T10DRAFT_76705 | 206  | 3.00E-49  | 88%        | 48.78%     | <i>Thelonectria olida</i>          | KAH6887013.1                      |
| Transaldolase                         | 365  | 0         | 100%       | 87.16%     | <i>Colletotrichum siamense</i>     | KAF4850344.1                      |
| membrane transporter D1               | 599  | 0         | 99%        | 82.58%     | <i>Ilyonectria destructans</i>     | KAH7006833.1                      |
| thioredoxin                           | 328  | 4.00E-173 | 100%       | 73.78%     | <i>Plectosphaerella cucumerina</i> | KAH7368325.1                      |

|                                                                                          |      |           |      |        |                                |                |
|------------------------------------------------------------------------------------------|------|-----------|------|--------|--------------------------------|----------------|
| hypothetical protein<br>BDV96DRAFT_558457                                                | 184  | 5.00E-25  | 94%  | 34.43% | <i>Lophiotrema nucula</i>      | KAF2106919.1   |
| Dihydrolipoyllysine-residue<br>acetyltransferase component of acetoin<br>cleaving system | 271  | 2.00E-119 | 97%  | 62.74% | <i>Colletotrichum siamense</i> | XP_036493445.1 |
| serine hydrolase-domain-containing protein                                               | 284  | 5.00E-132 | 100% | 63.73% | <i>Aspergillus avenaceus</i>   | KAE8150729.1   |
| hypothetical protein<br>BDV25DRAFT_139560                                                | 4028 | 0         | 99%  | 67.20% | <i>Aspergillus avenaceus</i>   | KAE8150730.1   |
| hypothetical protein CC78DRAFT_576631                                                    | 470  | 0         | 100% | 64.47% | <i>Didymosphaeria enalia</i>   | KAF2268082.1   |
| P-loop containing nucleoside triphosphate<br>hydrolase protein                           | 1072 | 0         | 95%  | 58.36% | <i>Clohesyomyces aquaticus</i> | ORY13587.1     |
| hypothetical protein                                                                     | 466  | 0         | 99%  | 62.77% | <i>Didymosphaeria enalia</i>   | KAF2268085.1   |
| cytochrome P450                                                                          | 531  | 0         | 97%  | 66.54% | <i>Aspergillus avenaceus</i>   | KAE8150736.1   |
| putative alcohol dehydrogenase                                                           | 368  | 0         | 100% | 77.08% | <i>Aspergillus avenaceus</i>   | KAE8150737.1   |
| cytochrome P450                                                                          | 477  | 0         | 96%  | 65.60% | <i>Aspergillus avenaceus</i>   | KAE8150739.1   |

**124) *Verticillium zaregamsianum* contig\_NMXM01000002, VRPKS-I-7 cluster**

| Gene name                                                 | Size | E value   | % Coverage | % identity | Top blast hit                    | Accession number of top blast hit |
|-----------------------------------------------------------|------|-----------|------------|------------|----------------------------------|-----------------------------------|
| hypothetical protein B0I35DRAFT_444981                    | 498  | 9.00E-05  | 36%        | 25.60%     | <i>Stachybotrys elegans</i>      | KAH7304539.1                      |
| Alpha/Beta hydrolase protein                              | 496  | 3.00E-139 | 93%        | 50.94%     | <i>Xylariaceae sp. FL0594</i>    | KAI0391246.1                      |
| serine hydrolase domain-containing protein                | 255  | 3.00E-110 | 96%        | 67.48%     | <i>Sarocladium implicatum</i>    | KAH8169124.1                      |
| hypothetical protein LIA77_11249                          | 622  | 5.00E-91  | 72%        | 49.67%     | <i>Sarocladium implicatum</i>    | KAH8169123.1                      |
| polyketide synthase dehydratase domain-containing protein | 2690 | 0         | 96%        | 78.19%     | <i>Sarocladium implicatum</i>    | KAH8169122.1                      |
| major facilitator superfamily protein                     | 491  | 0         | 97%        | 77.50%     | <i>Sarocladium implicatum</i>    | KAH8169121.1                      |
| aldose 1-epimerase domain-containing protein              | 427  | 0         | 98%        | 75.00%     | <i>Sarocladium implicatum</i>    | KAH8169120.1                      |
| aldose 1-epimerase domain-containing protein              | 452  | 0         | 92%        | 78.80%     | <i>Sarocladium implicatum</i>    | KAH8169120.1                      |
| cytochrome p450 domain-containing protein                 | 539  | 0         | 100%       | 72.17%     | <i>Sarocladium implicatum</i>    | KAH8169119.1                      |
| hypothetical protein AK830_g5169                          | 819  | 0         | 98%        | 57.03%     | <i>Neonectria ditissima</i>      | KPM41386.1                        |
| hypothetical protein AK830_g5170                          | 734  | 0         | 98%        | 69.86%     | <i>Neonectria ditissima</i>      | KPM41355.1                        |
| hypothetical protein FGSG_03330                           | 462  | 0         | 98%        | 65.65%     | <i>Fusarium graminearum PH-1</i> | XP_011322406.1                    |

**125) *Verticillium zaregamsianum* contig\_NMXM01000003, VRPKS-I-26 cluster**

| Gene name                                 | Size | E value  | % Coverage | % identity | Top blast hit                     | Accession number of top blast hit |
|-------------------------------------------|------|----------|------------|------------|-----------------------------------|-----------------------------------|
| hypothetical protein<br>F5X68DRAFT_228683 | 78   | 6.00E-15 | 100%       | 62.82%     | <i>Plectosphaerella plurivora</i> | KAH6692307.1                      |

|                                                                 |      |           |      |        |                                               |                |
|-----------------------------------------------------------------|------|-----------|------|--------|-----------------------------------------------|----------------|
| peptidase family C25-domain-containing protein                  | 1019 | 0         | 99%  | 57.48% | <i>Paraphoma chrysanthemicola</i>             | KAH7091334.1   |
| hypothetical protein                                            | 578  | 0         | 96%  | 88.33% | <i>Colletotrichum higginsianum</i> IMI 349063 | XP_018157666.1 |
| Satratoxin biosynthesis SC1 cluster protein 4                   | 375  | 5.00E-174 | 100% | 68.11% | <i>Plectosphaerella cucumerina</i>            | KAH7362744.1   |
| uncharacterized protein KVR01_002788                            | 522  | 4.00E-139 | 95%  | 43.90% | <i>Diaporthe batatas</i>                      | XP_044647803.1 |
| putative pectate lyase F                                        | 236  | 3.00E-140 | 97%  | 83.98% | <i>Colletotrichum fructicola</i>              | XP_031890093.1 |
| Retinoic acid induced 16-like protein-domain-containing protein | 1004 | 0         | 100% | 73.21% | <i>Plectosphaerella cucumerina</i>            | KAH7362743.1   |
| hypothetical protein B0T11DRAFT_318355                          | 163  | 1.00E-54  | 98%  | 65.85% | <i>Plectosphaerella cucumerina</i>            | KAH7362742.1   |
| uncharacterized protein KVR01_004169                            | 223  | 9.00E-06  | 25%  | 45.61% | <i>Diaporthe batatas</i>                      | XP_044646333.1 |
| hypothetical protein F5B20DRAFT_586947                          | 2349 | 0         | 99%  | 52.43% | <i>Whalleya microplaca</i>                    | KAI1073750.1   |
| TTL domain-containing protein                                   | 473  | 0         | 100% | 73.44% | <i>Coniochaeta sp. 2T2.1</i>                  | KAB5518934.1   |
| retinol dehydrogenase                                           | 312  | 0         | 100% | 78.21% | <i>Plectosphaerella plurivora</i>             | KAH6675343.1   |
| peptidase family M28                                            | 372  | 0         | 100% | 78.76% | <i>Dactylonectria estremocensis</i>           | KAH7144232.1   |
| uncharacterized protein PODANS_6_2250                           | 216  | 7.00E-30  | 80%  | 41.71% | <i>Podospora anserina S mat+</i>              | XP_001910274.1 |
| heterokaryon incompatibility protein-domain-containing protein  | 742  | 0         | 100% | 77.63% | <i>Chaetomium sp. MPI-CAGE-AT-0009</i>        | KAH6847694.1   |
| FAD-dependent monooxygenase                                     | 453  | 0         | 100% | 84.55% | <i>Stachybotrys elegans</i>                   | KAH7303249.1   |
| glycosyl transferase                                            | 427  | 3.00E-135 | 77%  | 58.26% | <i>Trichoderma arundinaceum</i>               | RFU78228.1     |
| alpha-l-rhamnosidase                                            | 898  | 0         | 97%  | 68.11% | <i>Colletotrichum truncatum</i>               | XP_036586343.1 |

**126) *Verticillium zaregamsianum* contig\_NMXM01000003, VNRPKS-I-2 cluster**

| Gene name                                               | Size | E value   | % Coverage | % identity | Top blast hit                           | Accession number of top blast hit |
|---------------------------------------------------------|------|-----------|------------|------------|-----------------------------------------|-----------------------------------|
| putative monooxygenase                                  | 501  | 0         | 74%        | 87.67%     | <i>Monosporascus ibericus</i>           | RYP01441.1                        |
| PKS16 protein                                           | 2126 | 0         | 100%       | 84.68%     | <i>Monosporascus ibericus</i>           | RYP01440.1                        |
| putative MFS multidrug transporter                      | 514  | 0         | 97%        | 85.52%     | <i>Monosporascus ibericus</i>           | RYP01439.1                        |
| hypothetical protein CEP54_016375                       | 209  | 2.00E-23  | 66%        | 38.93%     | <i>Fusarium sp. AF-8</i>                | RSL39030.1                        |
| NmrA-like family protein                                | 292  | 6.00E-105 | 98%        | 55.48%     | <i>Ilyonectria sp. MPI-CAGE-AT-0026</i> | KAH6955623.1                      |
| hypothetical protein DL768_001135                       | 453  | 0         | 99%        | 79.65%     | <i>Monosporascus sp. mg162</i>          | RYP53985.1                        |
| amidohydrolase 3                                        | 674  | 0         | 94%        | 78.02%     | <i>Colletotrichum karsti</i>            | XP_038751725.1                    |
| major facilitator superfamily domain-containing protein | 466  | 0         | 99%        | 73.77%     | <i>Fusarium zealandicum</i>             | KAF4979810.1                      |
| alpha/beta fold hydrolase                               | 131  | 1.00E-26  | 97%        | 35.15%     | <i>Zasmidium cellare ATCC 36951</i>     | XP_033665360.1                    |
| Alpha/Beta hydrolase protein                            | 299  | 0         | 98%        | 79.73%     | <i>Fusarium sarcochroum</i>             | KAF4949579.1                      |

|                                       |     |           |      |        |                                                     |              |
|---------------------------------------|-----|-----------|------|--------|-----------------------------------------------------|--------------|
| cellobiose dehydrogenase              | 538 | 0         | 95%  | 76.12% | <i>Plectosphaerella plurivora</i>                   | KAH6685971.1 |
| general substrate transporter         | 521 | 0         | 100% | 82.73% | <i>Plectosphaerella plurivora</i>                   | KAH6695665.1 |
| hypothetical protein FSARC_5046       | 565 | 0         | 98%  | 58.82% | <i>Fusarium sarcochroum</i>                         | KAF4967388.1 |
| general substrate transporter         | 534 | 0         | 94%  | 79.49% | <i>Corynespora cassiicola</i><br><i>Philippines</i> | PSN67207.1   |
| hypothetical protein BS50DRAFT_553126 | 285 | 5.00E-159 | 100% | 76.57% | <i>Corynespora cassiicola</i><br><i>Philippines</i> | PSN67208.1   |

**127) *Verticillium zaregamsianum* contig\_NMXM01000009, VRPKS-I-14 cluster**

| Gene name                                               | Size | E value   | % Coverage | % identity | Top blast hit                                       | Accession number of top blast hit |
|---------------------------------------------------------|------|-----------|------------|------------|-----------------------------------------------------|-----------------------------------|
| lipolytic G-D-S-L family                                | 1445 | 0         | 97%        | 49.08%     | <i>Cylindrodendrum hubeiense</i>                    | KAF7556154.1                      |
| hypothetical protein FALBO_210                          | 142  | 6.00E-62  | 86%        | 75.61%     | <i>Fusarium albosuccineum</i>                       | KAF4472888.1                      |
| hypothetical protein HYQ45_016732                       | 88   | 0.002     | 100%       | 70.33%     | <i>Verticillium longisporum</i>                     | KAG7113540.1                      |
| FK506-binding protein                                   | 191  | 9.00E-76  | 100%       | 69.27%     | <i>Plectosphaerella cucumerina</i>                  | KAH7367672.1                      |
| hypothetical protein SODALDRAFT_267625                  | 465  | 0         | 98%        | 79.69%     | <i>Sodiomyces alkalinus F11</i>                     | XP_028471380.1                    |
| Vanillyl-alcohol oxidase                                | 562  | 0         | 99%        | 86.40%     | <i>Plectosphaerella plurivora</i>                   | KAH6673908.1                      |
| hypothetical protein B0T11DRAFT_56928                   | 204  | 1.00E-99  | 100%       | 72.46%     | <i>Plectosphaerella cucumerina</i>                  | KAH7367670.1                      |
| short-chain dehydrogenase/reductase                     | 339  | 2.00E-118 | 94%        | 57.05%     | <i>Cenococcum geophilum 1.58</i>                    | OCK87093.1                        |
| hypothetical protein CEP53_002056                       | 374  | 1.00E-149 | 97%        | 69.86%     | <i>Fusarium sp. AF-6</i>                            | RSL69861.1                        |
| cytochrome P450                                         | 506  | 0         | 100%       | 79.25%     | <i>Plectosphaerella cucumerina</i>                  | KAH7367666.1                      |
| major facilitator superfamily domain-containing protein | 584  | 0         | 81%        | 63.52%     | <i>Truncatella angustata</i>                        | XP_045957260.1                    |
| putative polyketide synthase                            | 2898 | 0         | 100%       | 56.98%     | <i>Truncatella angustata</i>                        | XP_045957259.1                    |
| fatty acid desaturase domain-containing protein         | 610  | 0         | 100%       | 64.34%     | <i>Sarocladium implicatum</i>                       | KAH8177350.1                      |
| Acyl-CoA dehydrogenase/oxidase                          | 603  | 0         | 93%        | 50.09%     | <i>Ophiocordyceps polyrhachis-furcata BCC 54312</i> | RCI16331.1                        |
| hypothetical protein CGLO_06291                         | 489  | 1.00E-124 | 98%        | 39.75%     | <i>Colletotrichum gloeosporioides Cg-14</i>         | EQB53932.1                        |

**128) *Verticillium zaregamsianum* contig\_NMXM01000006, VRPKS-I-21 cluster**

| Gene name                               | Size | E value   | % Coverage | % identity | Top blast hit                   | Accession number of top blast hit |
|-----------------------------------------|------|-----------|------------|------------|---------------------------------|-----------------------------------|
| NAD-binding protein                     | 305  | 3.00E-111 | 87%        | 64.54%     | <i>Sodiomyces alkalinus F11</i> | XP_028469385.1                    |
| hypothetical protein SODALDRAFT_331329  | 213  | 4.00E-36  | 53%        | 57.52%     | <i>Sodiomyces alkalinus F11</i> | XP_028469386.1                    |
| uncharacterized protein CkaCkLH20_05965 | 592  | 3.00E-92  | 89%        | 37.17%     | <i>Colletotrichum karsti</i>    | XP_038746018.1                    |
| translation initiation factor SUI1      | 119  | 5.00E-59  | 100%       | 84.87%     | <i>Sodiomyces alkalinus F11</i> | XP_028469384.1                    |



|                                               |      |           |      |         |                                       |                |
|-----------------------------------------------|------|-----------|------|---------|---------------------------------------|----------------|
| nucleotide exchange factor SIL1               | 422  | 3.00E-131 | 92%  | 60.46%  | <i>Plectosphaerella cucumerina</i>    | KAH7359363.1   |
| nadh-ubiquinone oxidoreductase kda subunit    | 169  | 1.00E-77  | 100% | 67.84%  | <i>Colletotrichum incanum</i>         | KZL88236.1     |
| hypothetical protein LI328DRAFT_141063        | 434  | 4.00E-06  | 43%  | 28.28%  | <i>Trichoderma asperelloides</i>      | KAH8128511.1   |
| 40s ribosomal protein s15                     | 153  | 6.00E-88  | 84%  | 100.00% | <i>Colletotrichum truncatum</i>       | XP_036583553.1 |
| cytochrome p450 domain-containing protein     | 507  | 0         | 100% | 84.28%  | <i>Sarocladium implicatum</i>         | KAH8171308.1   |
| Lovastatin diketide synthase LovF 2           | 2331 | 0         | 100% | 74.50%  | <i>Colletotrichum chlorophyti</i>     | OLN91972.1     |
| hypothetical protein SODALDRAFT_331321        | 352  | 1.00E-36  | 94%  | 36.02%  | <i>Sodiomyces alkalinus F11</i>       | XP_028469379.1 |
| Monothiol glutaredoxin-7                      | 266  | 1.00E-83  | 98%  | 63.60%  | <i>Colletotrichum chlorophyti</i>     | OLN81123.1     |
| hypothetical protein BN1723_009283            | 137  | 0.012     | 87%  | 38.46%  | <i>Verticillium longisporum</i>       | CRK11148.1     |
| glutathione-dependent formaldehyde-activating | 207  | 1.00E-44  | 99%  | 48.56%  | <i>Plectosphaerella plurivora</i>     | KAH6682279.1   |
| hypothetical protein G7046_g1361              | 1253 | 0         | 97%  | 48.50%  | <i>Styloectria norvegica</i>          | KAF7562768.1   |
| Arsenical-resistance protein Acr3             | 384  | 0         | 97%  | 80.48%  | <i>Colletotrichum viniferum</i>       | KAF4919918.1   |
| uncharacterized protein GCG54_00009924        | 566  | 0         | 99%  | 58.97%  | <i>Colletotrichum gloeosporioides</i> | XP_045271398.1 |
| cystathionine gamma-lyase                     | 421  | 0         | 96%  | 91.89%  | <i>Colletotrichum tofieldiae</i>      | KZL65728.1     |
| hypothetical protein SODALDRAFT_377226        | 466  | 0         | 99%  | 69.65%  | <i>Sodiomyces alkalinus F11</i>       | XP_028469373.1 |
| hypothetical protein K445DRAFT_313536         | 319  | 5.00E-140 | 92%  | 67.91%  | <i>Daldinia sp. EC12</i>              | OTB19762.1     |

**129) *Verticillium zaregamsianum* contig\_NMXM01000013, VRPKS-I-19 cluster**

| Gene name                                   | Size | E value   | % Coverage | % identity | Top blast hit                            | Accession number of top blast hit |
|---------------------------------------------|------|-----------|------------|------------|------------------------------------------|-----------------------------------|
| vacuolar protein sorting-associated protein | 161  | 7.00E-13  | 63%        | 50.48%     | <i>Plectosphaerella cucumerina</i>       | KAH7368195.1                      |
| putative beta-glucosidase G                 | 832  | 0         | 99%        | 68.89%     | <i>Aspergillus sydowii</i> CBS 593.65    | XP_040708017.1                    |
| cutinase-2                                  | 224  | 1.00E-131 | 92%        | 87.44%     | <i>Plectosphaerella cucumerina</i>       | KAH7368196.1                      |
| cytochrome P450                             | 544  | 2.00E-119 | 91%        | 40.84%     | <i>Ilyonectria destructans</i>           | KAH7009626.1                      |
| uncharacterized protein CkaCkLH20_03768     | 1128 | 0         | 99%        | 67.87%     | <i>Colletotrichum karsti</i>             | XP_038748329.1                    |
| uncharacterized protein GLRG_06876          | 1117 | 0         | 98%        | 72.47%     | <i>Colletotrichum graminicola</i> M1.001 | XP_008095607.1                    |
| Type I Polyketide synthase                  | 2141 | 0         | 99%        | 75.93%     | <i>Leptosphaeria biglobosa</i>           | KAH9873394.1                      |
| hypothetical protein E4U21_006806           | 297  | 2.00E-108 | 99%        | 57.38%     | <i>Claviceps maximensis</i>              | KAG6006661.1                      |
| MFS general substrate transporter           | 574  | 0         | 98%        | 70.00%     | <i>Sodiomyces alkalinus F11</i>          | XP_028468956.1                    |
| thioredoxin-like protein                    | 162  | 8.00E-86  | 98%        | 77.36%     | <i>Hypoxylon sp. FL0890</i>              | KAI0834638.1                      |

|                                                                 |     |           |      |        |                                                 |                |
|-----------------------------------------------------------------|-----|-----------|------|--------|-------------------------------------------------|----------------|
| hypothetical protein AK830_g4742                                | 498 | 7.00E-78  | 83%  | 40.90% | <i>Neonectria ditissima</i>                     | KPM41855.1     |
| hypothetical protein F5882DRAFT_368496                          | 392 | 7.00E-53  | 92%  | 31.28% | <i>Hyaloscypha sp. PMI_1271</i>                 | KAH8752665.1   |
| exopolysaccharide synthase                                      | 469 | 0         | 94%  | 71.59% | <i>Monosporascus sp. mg162</i>                  | RYP54678.1     |
| uncharacterized protein PgNI_04980                              | 394 | 0         | 100% | 89.85% | <i>Pyricularia grisea</i>                       | XP_030984371.1 |
| DeSI-like protein sdu1                                          | 235 | 1.00E-114 | 99%  | 75.97% | <i>Colletotrichum orbiculare</i><br>MAFF 240422 | TDZ21862.1     |
| hypothetical protein CFIO01_06157                               | 250 | 2.00E-91  | 100% | 56.40% | <i>Colletotrichum fiorinae PJ7</i>              | EXF75199.1     |
| TIM44 subunit of mitochondria import inner membrane translocase | 541 | 0         | 100% | 75.92% | <i>Sodiomyces alkalinus F11</i>                 | XP_028468965.1 |
| hypothetical protein B0J18DRAFT_6692                            | 111 | 6.00E-27  | 76%  | 61.63% | <i>Chaetomium sp. MPI-SDFR-AT-0129</i>          | KAH6634037.1   |
| hypothetical protein ACRE_064810                                | 288 | 3.00E-85  | 95%  | 49.46% | <i>Acremonium chrysogenum</i><br>ATCC 11550     | KFH42767.1     |
| hypothetical protein SODALDRAFT_333514                          | 77  | 3.00E-21  | 97%  | 55.13% | <i>Sodiomyces alkalinus F11</i>                 | XP_028465568.1 |
| Alpha-glucosidase permease MPH3 like protein                    | 542 | 0         | 99%  | 75.23% | <i>Cylindrodendrum hubeiense</i>                | KAF7546071.1   |

**130) *Verticillium zaregamsianum* contig\_NMXM01000005, VRPKS-I-12 and VNPKS-I-1 clusters**

| Gene name                                 | Size | E value   | % Coverage | % identity | Top blast hit                      | Accession number of top blast hit |
|-------------------------------------------|------|-----------|------------|------------|------------------------------------|-----------------------------------|
| transcription factor Cmr1                 | 925  | 0         | 99%        | 72.20%     | <i>Colletotrichum musicola</i>     | KAF6845250.1                      |
| hypothetical protein                      | 424  | 1.00E-145 | 100%       | 56.41%     | <i>Colletotrichum incanum</i>      | KZL86702.1                        |
| uncharacterized protein                   | 325  | 0         | 99%        | 85.19%     | <i>Colletotrichum truncatum</i>    | XP_036586400.1                    |
| Conidial pigment polyketide synthase      | 2188 | 0         | 100%       | 79.05%     | <i>Colletotrichum camelliae</i>    | KAH0426510.1                      |
| laccase-like multicopper oxidase          | 561  | 0         | 98%        | 67.33%     | <i>Plectosphaerella cucumerina</i> | KAH7358155.1                      |
| uncharacterized protein CTRU02_08118      | 316  | 0.002     | 62%        | 25.65%     | <i>Colletotrichum truncatum</i>    | XP_036582041.1                    |
| hypothetical protein SODALDRAFT_331196    | 388  | 2.00E-129 | 99%        | 63.92%     | <i>Sodiomyces alkalinus F11</i>    | XP_028469270.1                    |
| L-2,4-diaminobutyrate decarboxylase       | 514  | 0         | 87%        | 65.11%     | <i>Colletotrichum trifolii</i>     | TDZ67276.1                        |
| polyketide synthase                       | 3891 | 0         | 99%        | 75.46%     | <i>Sodiomyces alkalinus F11</i>    | XP_028469272.1                    |
| hypothetical protein SODALDRAFT_331204    | 888  | 0         | 86%        | 70.04%     | <i>Sodiomyces alkalinus F11</i>    | XP_028469275.1                    |
| FAD/NAD-binding domain-containing protein | 428  | 0         | 93%        | 74.00%     | <i>Sodiomyces alkalinus F11</i>    | XP_028469276.1                    |
| eukaryotic aspartyl protease              | 432  | 0         | 96%        | 56.97%     | <i>Colletotrichum simmondsii</i>   | KXH41725.1                        |
| beta-ketoacyl synthase                    | 366  | 2.00E-90  | 100%       | 47.06%     | <i>Thelonectria olida</i>          | KAH6899712.1                      |
| cytochrome P450                           | 484  | 0         | 94%        | 75.11%     | <i>Sodiomyces alkalinus F11</i>    | XP_028469280.1                    |
| hypothetical protein FPOAC1_009761        | 238  | 2.00E-82  | 89%        | 59.53%     | <i>Fusarium poae</i>               | XP_044706852.1                    |

**131) *Verticillium zaregamsianum* contig\_NMXM01000008, VRPKS-I-5 cluster**

| Gene name | Size | E value | % Coverage | % identity | Top blast hit | Accession number of top blast hit |
|-----------|------|---------|------------|------------|---------------|-----------------------------------|
|-----------|------|---------|------------|------------|---------------|-----------------------------------|

|                                                         |      |           |      |        |                                        |                |
|---------------------------------------------------------|------|-----------|------|--------|----------------------------------------|----------------|
| hypothetical protein jhhlp_008516                       | 813  | 0         | 99%  | 75.61% | <i>Lomentospora prolificans</i>        | PKS05149.1     |
| Isochorismatase-like protein                            | 244  | 2.00E-127 | 90%  | 77.48% | <i>Plectosphaerella plurivora</i>      | KAH6676014.1   |
| hypothetical protein B0T11DRAFT_333834                  | 160  | 9.00E-32  | 63%  | 64.71% | <i>Plectosphaerella cucumerina</i>     | KAH7347765.1   |
| DUF636 domain-containing protein                        | 137  | 1.00E-67  | 100% | 81.75% | <i>Metarhizium acridum</i>             | KAG8415691.1   |
| hypothetical protein F4775DRAFT_593279                  | 4017 | 0         | 99%  | 65.91% | <i>Biscogniauxia sp. FL1348</i>        | KAI0597589.1   |
| hypothetical protein B0I37DRAFT_378309                  | 506  | 3.00E-64  | 62%  | 58.22% | <i>Chaetomium sp. MPI-CAGE-AT-0009</i> | KAH6844803.1   |
| hypothetical protein BGAL_0184g00240                    | 199  | 6.00E-60  | 89%  | 53.33% | <i>Botrytis galanthina</i>             | THV49682.1     |
| major facilitator superfamily-domain-containing protein | 612  | 0         | 89%  | 72.68% | <i>Biscogniauxia sp. FL1348</i>        | KAI0597572.1   |
| MFS general substrate transporter                       | 428  | 1.00E-137 | 92%  | 67.25% | <i>Glarea lozoyensis ATCC 20868</i>    | XP_008088685.1 |
| glutathione S-transferase domain-containing protein     | 224  | 1.00E-122 | 99%  | 76.68% | <i>fungus sp. No.14919</i>             | GAW23379.1     |
| hypothetical protein SODALDRAFT_41197                   | 1629 | 0         | 98%  | 71.49% | <i>Sodiomyces alkalinus F11</i>        | XP_028471323.1 |
| GPI-GlcNAc transferase complex                          | 222  | 3.00E-46  | 97%  | 62.67% | <i>Plectosphaerella cucumerina</i>     | KAH7347756.1   |
| pseudouridine synthase                                  | 604  | 0         | 96%  | 52.15% | <i>Sodiomyces alkalinus F11</i>        | XP_028471325.1 |

### 132) *Verticillium zaregamsianum* contig\_NMXM01000001, VRPKS-I-1 cluster

| Gene name                                               | Size | E value   | % Coverage | % identity | Top blast hit                      | Accession number of top blast hit |
|---------------------------------------------------------|------|-----------|------------|------------|------------------------------------|-----------------------------------|
| glycogen debranching enzyme                             | 447  | 0         | 100%       | 79.06%     | <i>Dactylonectria macrodidyma</i>  | KAH7115576.1                      |
| thiol-specific monooxygenase                            | 507  | 0         | 99%        | 76.94%     | <i>Plectosphaerella plurivora</i>  | KAH6686480.1                      |
| major facilitator superfamily domain-containing protein | 579  | 0         | 91%        | 69.43%     | <i>Xylariales sp. PMI_506</i>      | KAH8666575.1                      |
| hypothetical protein BX600DRAFT_462019                  | 343  | 2.00E-80  | 66%        | 54.55%     | <i>Xylariales sp. PMI_506</i>      | KAH8666574.1                      |
| hypothetical protein                                    | 194  | 2.00E-44  | 96%        | 37.23%     | <i>Botryosphaeria dothidea</i>     | KAF4312163.1                      |
| hypothetical protein CDV55_104319                       | 360  | 9.00E-107 | 98%        | 48.02%     | <i>Aspergillus turcosus</i>        | RHZ60657.1                        |
| Alpha/Beta hydrolase protein                            | 468  | 5.00E-117 | 99%        | 45.44%     | <i>Aspergillus leporis</i>         | KAB8069129.1                      |
| hypothetical protein VF21_05751                         | 334  | 6.00E-06  | 33%        | 32.48%     | <i>Pseudogymnoascus sp. 05NY08</i> | OBT75937.1                        |
| hypothetical protein G6514_000112                       | 315  | 3.00E-66  | 96%        | 39.35%     | <i>Epicoccum nigrum</i>            | KAG9206825.1                      |
| uncharacterized protein PAC_08242                       | 439  | 1.00E-112 | 94%        | 42.21%     | <i>Phialocephala subalpina</i>     | CZR58350.1                        |
| hypothetical protein                                    | 4122 | 0         | 99%        | 44.80%     | <i>Didymosphaeria enalia</i>       | KAF2268646.1                      |
| ABC transporter FUM19 like protein                      | 1410 | 0         | 99%        | 77.02%     | <i>Plectosphaerella cucumerina</i> | KAH7359175.1                      |
| hypothetical protein FDECE_14782                        | 473  | 9.00E-07  | 34%        | 31.71%     | <i>Fusarium decemcellulare</i>     | KAF4989247.1                      |

|                                                     |     |           |     |        |                                                        |                |
|-----------------------------------------------------|-----|-----------|-----|--------|--------------------------------------------------------|----------------|
| hypothetical protein S40285_07973                   | 380 | 4.00E-148 | 96% | 62.93% | <i>Stachybotrys chlorohalonata</i><br><i>IBT 40285</i> | KFA69565.1     |
| S-adenosyl-L-methionine-dependent methyltransferase | 420 | 1.00E-130 | 95% | 49.01% | <i>Emericellopsis atlantica</i>                        | XP_046116985.1 |
| hypothetical protein FDECE_1566                     | 598 | 0         | 95% | 80.07% | <i>Fusarium decemcellulare</i>                         | KAF5012339.1   |
| conserved hypothetical protein                      | 447 | 0         | 99% | 69.73% | <i>Uncinocarpus reesii 1704</i>                        | XP_002583601.1 |

**133) *Verticillium zaregamsianum* contig\_NMXM01000001, VRPKS-I-6 cluster**

| Gene name                                               | Size | E value   | % Coverage | % identity | Top blast hit                      | Accession number of top blast hit |
|---------------------------------------------------------|------|-----------|------------|------------|------------------------------------|-----------------------------------|
| hypothetical protein B0T11DRAFT_270545                  | 719  | 0         | 99%        | 62.10%     | <i>Plectosphaerella cucumerina</i> | KAH7375570.1                      |
| hypothetical protein F5X68DRAFT_47703                   | 256  | 1.00E-63  | 89%        | 47.37%     | <i>Plectosphaerella plurivora</i>  | KAH6693919.1                      |
| hypothetical protein B0T11DRAFT_86728                   | 585  | 0         | 99%        | 67.50%     | <i>Plectosphaerella cucumerina</i> | KAH7362695.1                      |
| 2OG-Fe oxygenase family protein                         | 332  | 8.00E-158 | 99%        | 70.39%     | <i>Colletotrichum incanum</i>      | OHW94343.1                        |
| Uracil permease like protein                            | 507  | 0         | 97%        | 82.76%     | <i>Colletotrichum camelliae</i>    | KAH0420306.1                      |
| uncharacterized protein HER10_EVM0008554                | 108  | 4.00E-16  | 76%        | 73.49%     | <i>Colletotrichum scovillei</i>    | XP_035337453.1                    |
| hypothetical protein jhhlp_008882                       | 194  | 8.00E-54  | 96%        | 49.21%     | <i>Lomentospora prolificans</i>    | PKS05504.1                        |
| hypothetical protein FALBO_5956                         | 314  | 0         | 100%       | 85.99%     | <i>Fusarium albosuccineum</i>      | KAF4467173.1                      |
| polyketide synthase                                     | 3176 | 0         | 99%        | 55.53%     | <i>Fusarium avenaceum</i>          | KIL85244.1                        |
| hypothetical protein BT63DRAFT_423135                   | 196  | 2.00E-22  | 82%        | 69.57%     | <i>Microthyrium microscopium</i>   | KAF2670841.1                      |
| endo-1,4-beta-glucanase                                 | 297  | 2.00E-94  | 81%        | 59.18%     | <i>Colletotrichum sojae</i>        | KAF6788143.1                      |
| epoxide hydrolase                                       | 409  | 0         | 98%        | 62.94%     | <i>Plectosphaerella plurivora</i>  | KAH6662678.1                      |
| hypothetical protein SODALDRAFT_4980                    | 186  | 4.00E-45  | 78%        | 60.96%     | <i>Sodiomyces alkalinus F11</i>    | XP_028469806.1                    |
| endoglucanase-1                                         | 233  | 6.00E-134 | 98%        | 78.60%     | <i>Plectosphaerella cucumerina</i> | KAH7362705.1                      |
| major facilitator superfamily domain-containing protein | 583  | 0         | 100%       | 85.25%     | <i>Plectosphaerella cucumerina</i> | KAH7368056.1                      |
| glycogen debranching enzyme                             | 447  | 0         | 100%       | 79.06%     | <i>Dactylonectria macrodidyma</i>  | KAH7115576.1                      |

## SUPPLEMENTARY FILE S2

(Sayari *et al* - *Verticillium Polyketide biosynthesis gene clusters*)

The tables below show the top 10 tblastn hits NCBI's non-redundant nucleotide database for each of the *Verticillium* PKS genes examined in this study. The blast scores (E-value, percent sequence identity and coverage) and the Accession number of the top hits are indicated.

| <i>Verticillium dahliae</i> contig<br>NW_009276940, VRPKS-I-22 | Species of BLAST hit              | % coverage | % identity | E-value | Accession number |
|----------------------------------------------------------------|-----------------------------------|------------|------------|---------|------------------|
| R-PKS-I                                                        | <i>Fusarium miscanthi</i>         | 99         | 70.93      | 0       | ALQ32877         |
| R-PKS-I                                                        | <i>Fusarium denticulatum</i>      | 100        | 70.66      | 0       | KAF5687147       |
| R-PKS-I                                                        | <i>Fusarium mexicanum</i>         | 99         | 70.83      | 0       | KAF5539484       |
| R-PKS-I                                                        | <i>Fusarium acutatum</i>          | 99         | 71.09      | 0       | KAF4428951       |
| R-PKS-I                                                        | <i>Fusarium sp</i>                | 99         | 71         | 0       | KAF5020446       |
| R-PKS-I                                                        | <i>Fusarium subglutinans</i>      | 99         | 70.79      | 0       | XP_036534733     |
| R-PKS-I                                                        | <i>Fusarium pseudoanthophilum</i> | 100        | 70.86      | 0       | KAF5573817       |
| R-PKS-I                                                        | <i>Fusarium sarcochroum</i>       | 100        | 70.64      | 0       | KAF4944666       |
| R-PKS-I                                                        | <i>Fusarium sacchari</i>          | 99         | 70.94      | 0       | ALQ32937         |
| R-PKS-I                                                        | <i>Fusarium aywerte</i>           | 100        | 70.25      | 0       | ALQ32768         |

2)

| <i>Verticillium dahliae</i> contig<br>NW_009276940, VRPKS-I-23 | Species of BLAST hit              | % coverage | % identity | E-value | Accession number |
|----------------------------------------------------------------|-----------------------------------|------------|------------|---------|------------------|
| R-PKS-I                                                        | <i>Sodiomyces alkalinus</i>       | 99         | 49.71      | 0       | XP_028462492     |
| R-PKS-I                                                        | <i>Colletotrichum gloeosporio</i> | 97         | 43.70      | 0       | KAF3797175       |
| R-PKS-I                                                        | <i>Colletotrichum karsti</i>      | 97         | 43.50      | 0       | XP_038741012     |
| R-PKS-I                                                        | <i>Colletotrichum chlorophyti</i> | 98         | 43.08      | 0       | OLN85715         |
| R-PKS-I                                                        | <i>Colletotrichum aenigma</i>     | 97         | 43.02      | 0       | XP_037174401     |
| R-PKS-I                                                        | <i>Colletotrichum fructicola</i>  | 97         | 43.45      | 0       | XP_031892623     |
| R-PKS-I                                                        | <i>Colletotrichum fructicola</i>  | 97         | 43.45      | 0       | KAF5488909       |
| R-PKS-I                                                        | <i>Colletotrichum incanum</i>     | 99         | 43.42      | 0       | OHW97630         |
| R-PKS-I                                                        | <i>Colletotrichum viniferum</i>   | 97         | 43.19      | 0       | KAF4918834       |
| R-PKS-I                                                        | <i>Colletotrichum tropicale</i>   | 97         | 43.31      | 0       | KAF4828937       |

| <i>Verticillium dahliae</i> contig<br>NW_009276935, VRPKS-I-26 | Species of BLAST hit            | % coverage | % identity | E-value | Accession number |
|----------------------------------------------------------------|---------------------------------|------------|------------|---------|------------------|
| R-PKS-I                                                        | <i>Monosporascus sp</i>         | 98         | 62.71      | 0       | RYP50633         |
| R-PKS-I                                                        | <i>Arthrinium phaeospermum</i>  | 99         | 60.26      | 0       | P0CU84           |
| R-PKS-I                                                        | <i>Verticillium longisporum</i> | 80         | 87.35      | 0       | CRK37551         |
| R-PKS-I                                                        | <i>Verticillium longisporum</i> | 77         | 91.73      | 0       | CRK33507         |

|         |                               |    |       |   |              |
|---------|-------------------------------|----|-------|---|--------------|
| R-PKS-I | <i>Didymosphaeria enalia</i>  | 98 | 52.79 | 0 | KAF2259783   |
| R-PKS-I | <i>Lachnellula willkommii</i> | 98 | 53.11 | 0 | TVY89575     |
| R-PKS-I | <i>Lophiotrema nucula</i>     | 98 | 52.27 | 0 | KAF2119266   |
| R-PKS-I | <i>Lachnellula arida</i>      | 98 | 52.92 | 0 | TVY19100     |
| R-PKS-I | <i>Rutstroemia sp.</i>        | 98 | 53.70 | 0 | PQE16274     |
| R-PKS-I | <i>Aspergillus puulaa</i>     | 98 | 52.25 | 0 | XP_041560187 |

|                                                             |                                   |            |            |         |                  |
|-------------------------------------------------------------|-----------------------------------|------------|------------|---------|------------------|
| <i>Verticillium dahliae</i> contig<br>NW_009276935, PKS-III | Species of BLAST hit              | % coverage | % identity | E-value | Accession number |
| PKS-III                                                     | <i>Colletotrichum chlorophyti</i> | 100        | 72.01      | 0       | OLN95986         |
| PKS-III                                                     | <i>Colletotrichum tanacetii</i>   | 100        | 72.69      | 0       | TKW57803         |
| PKS-III                                                     | <i>Colletotrichum tofieldiae</i>  | 100        | 72.69      | 0       | KZL74511         |
| PKS-III                                                     | <i>Colletotrichum sublineola</i>  | 100        | 71.62      | 0       | KDN65911         |
| PKS-III                                                     | <i>Colletotrichum incanum</i>     | 100        | 72.46      | 0       | KZL80557         |
| PKS-III                                                     | <i>Colletotrichum graminicola</i> | 100        | 71.56      | 0       | XP_008099452     |
| PKS-III                                                     | <i>Colletotrichum incanum</i>     | 100        | 72.23      | 0       | OHW96035         |
| PKS-III                                                     | <i>Colletotrichum simmondsii</i>  | 100        | 71.40      | 0       | KXH46773         |
| PKS-III                                                     | <i>Colletotrichum camelliae</i>   | 99         | 72.69      | 0       | KAG2100071       |
| PKS-III                                                     | <i>Colletotrichum karsti</i>      | 100        | 72.81      | 0       | XP_038745402     |

|                                                                |                           |            |            |         |                  |
|----------------------------------------------------------------|---------------------------|------------|------------|---------|------------------|
| <i>Verticillium dahliae</i> contig<br>NW_009276938, VRPKS-I-19 | Species of BLAST hit      | % coverage | % identity | E-value | Accession number |
| R-PKS-I                                                        | <i>Claviceps purpurea</i> | 99         | 61.92      | 0       | KAG6168136       |
| R-PKS-I                                                        | <i>Claviceps purpurea</i> | 99         | 61.83      | 0       | KAG6264852       |
| R-PKS-I                                                        | <i>Claviceps purpurea</i> | 99         | 61.83      | 0       | KAG6172346       |
| R-PKS-I                                                        | <i>Claviceps purpurea</i> | 99         | 61.78      | 0       | KAG6313294       |
| R-PKS-I                                                        | <i>Claviceps purpurea</i> | 99         | 61.78      | 0       | KAG6257628       |
| R-PKS-I                                                        | <i>Claviceps purpurea</i> | 99         | 61.87      | 0       | KAG6178588.      |

|         |                           |    |       |   |            |
|---------|---------------------------|----|-------|---|------------|
| R-PKS-I | <i>Claviceps purpurea</i> | 99 | 61.83 | 0 | KAG6319079 |
| R-PKS-I | <i>Claviceps purpurea</i> | 99 | 61.83 | 0 | KAG6144460 |
| R-PKS-I | <i>Claviceps purpurea</i> | 99 | 61.74 | 0 | KAG6278039 |
| R-PKS-I | <i>Claviceps purpurea</i> | 99 | 61.74 | 0 | KAG6303654 |

|                                                               |                                             |            |            |         |                  |
|---------------------------------------------------------------|---------------------------------------------|------------|------------|---------|------------------|
| <i>Verticillium dahliae</i> contig<br>NW_009276923, VRPKS-I-1 | Species of BLAST hit                        | % coverage | % identity | E-value | Accession number |
| PKS-NRPS                                                      | <i>Massariosphaeria phaeospora</i>          | 99         | 44.38      | 0       | KAF2874833       |
| PKS-NRPS                                                      | <i>Phialocephala subalpina</i>              | 99         | 43.26      | 0       | CZR58354         |
| PKS-NRPS                                                      | <i>Coccidioides posadasii str. Silveira</i> | 99         | 43.55      | 0       | EFW16137         |
| PKS-NRPS                                                      | <i>Coccidioides immitis</i>                 | 99         | 43.44      | 0       | TPX24000         |
| PKS-NRPS                                                      | <i>Coccidioides immitis</i>                 | 99         | 43.37      | 0       | XP_001242733     |
| PKS-NRPS                                                      | <i>Coccidioides posadasii</i>               | 99         | 43.40      | 0       | XP_003069897     |
| PKS-NRPS                                                      | <i>Pseudogymnoascus sp.</i>                 | 99         | 43.07      | 0       | KFZ23096         |
| PKS-NRPS                                                      | <i>Saccharata proteae</i>                   | 99         | 43.26      | 0       | KAF2084690       |
| PKS-NRPS                                                      | <i>Pseudogymnoascus sp</i>                  | 99         | 43.05      | 0       | KFZ13457         |
| PKS-NRPS                                                      | <i>Pseudogymnoascus sp.</i>                 | 99         | 42.92      | 0       | KFX98753         |

|                                                                |                                       |            |            |         |                  |
|----------------------------------------------------------------|---------------------------------------|------------|------------|---------|------------------|
| <i>Verticillium dahliae</i> contig<br>NW_009276921, VNRPKS-I-1 | Species of BLAST hit                  | % coverage | % identity | E-value | Accession number |
| NR-PKS-I                                                       | <i>Colletotrichum karsti</i>          | 100        | 76.45      | 0       | XP_038751444     |
| NR-PKS-I                                                       | <i>Colletotrichum higginsianum</i>    | 100        | 75.74      | 0       | TIC92505         |
| NR-PKS-I                                                       | <i>Colletotrichum higginsianum</i>    | 100        | 75.74      | 0       | XP_018155915     |
| NR-PKS-I                                                       | <i>Colletotrichum higginsianum</i>    | 100        | 75.70      | 0       | CCF45141         |
| NR-PKS-I                                                       | <i>Colletotrichum gloeosporioides</i> | 100        | 76.19      | 0       | EQB55056         |
| NR-PKS-I                                                       | <i>Colletotrichum gloeosporioides</i> | 100        | 76.14      | 0       | KAF3809075       |
| NR-PKS-I                                                       | <i>Colletotrichum tropicale</i>       | 100        | 76.23      | 0       | KAF4827098       |

|          |                                  |     |       |   |            |
|----------|----------------------------------|-----|-------|---|------------|
| NR-PKS-I | <i>Colletotrichum asianum</i>    | 100 | 76.19 | 0 | KAF0322599 |
| NR-PKS-I | <i>Colletotrichum fructicola</i> | 100 | 76.14 | 0 | KAF4937522 |
| NR-PKS-I | <i>Colletotrichum siamense</i>   | 100 | 76.09 | 0 | KAF4812766 |

|                                                               |                                 |            |            |         |                  |
|---------------------------------------------------------------|---------------------------------|------------|------------|---------|------------------|
| <i>Verticillium dahliae</i> contig<br>NW_009276930, VRPKS-I-8 | Species of BLAST hit            | % coverage | % identity | E-value | Accession number |
| R-PKS-I                                                       | <i>Stemphylium lycopersici</i>  | 95         | 77.88      | 0       | RAR12984         |
| R-PKS-I                                                       | <i>Stemphylium lycopersici</i>  | 95         | 78.17      | 0       | RAR08647         |
| R-PKS-I                                                       | <i>Stemphylium lycopersici</i>  | 95         | 78.17      | 0       | KNG48001         |
| R-PKS-I                                                       | <i>Fusarium babinda</i>         | 95         | 76.25      | 0       | ALQ32784         |
| R-PKS-I                                                       | <i>Fusarium mundagurra</i>      | 94         | 78.24      | 0       | KAF5711130       |
| R-PKS-I                                                       | <i>Fusarium sp.</i>             | 93         | 79.39      | 0       | ALQ32968         |
| R-PKS-I                                                       | <i>Fusarium tjaetaba</i>        | 94         | 78.78      | 0       | XP_037202727     |
| R-PKS-I                                                       | <i>Fusarium napiforme</i>       | 93         | 78.78      | 0       | KAF5554444       |
| R-PKS-I                                                       | <i>Fusarium verticillioides</i> | 94         | 78.57      | 0       | XP_018757761     |
| R-PKS-I                                                       | <i>Fusarium verticillioides</i> | 94         | 78.57      | 0       | RBQ85559         |

|                                                                |                                   |            |            |         |                  |
|----------------------------------------------------------------|-----------------------------------|------------|------------|---------|------------------|
| <i>Verticillium dahliae</i> contig<br>NW_009276967, VRPKS-I-17 | Species of BLAST hit              | % coverage | % identity | E-value | Accession number |
| R-PKS-I                                                        | <i>Colletotrichum chlorophyti</i> | 99         | 70.46      | 0       | OLN86478         |
| R-PKS-I                                                        | <i>Colletotrichum truncatum</i>   | 99         | 69.83      | 0       | XP_036585096     |
| R-PKS-I                                                        | <i>Colletotrichum orbiculare</i>  | 99         | 69.69      | 0       | TDZ25780         |
| R-PKS-I                                                        | <i>Colletotrichum trifolii</i>    | 99         | 69.63      | 0       | TDZ28230         |
| R-PKS-I                                                        | <i>Colletotrichum sidae</i>       | 99         | 69.60      | 0       | TEA18683         |
| R-PKS-I                                                        | <i>Colletotrichum spinosum</i>    | 99         | 69.56      | 0       | TDZ31026         |
| R-PKS-I                                                        | <i>Colletotrichum musicola</i>    | 99         | 69.63      | 0       | KAF6830768       |
| R-PKS-I                                                        | <i>Colletotrichum fioriniae</i>   | 99         | 69.87      | 0       | EXF85385         |
| R-PKS-I                                                        | <i>Colletotrichum salicis</i>     | 99         | 69.75      | 0       | KXH66496         |



|         |                                 |    |       |   |              |
|---------|---------------------------------|----|-------|---|--------------|
| R-PKS-I | <i>Colletotrichum scovillei</i> | 99 | 69.75 | 0 | XP_035338972 |
|---------|---------------------------------|----|-------|---|--------------|

| <i>Verticillium dahliae</i> contig<br>NW_009276941, VNRPKS-I-3 | Species of BLAST hit                 | % coverage | % identity | E-value | Accession number |
|----------------------------------------------------------------|--------------------------------------|------------|------------|---------|------------------|
| NR-PKS-NRPS                                                    | <i>Sodiomyces alkalinus</i>          | 76         | 45.29      | 0       | XP_028463040     |
| NR-PKS-NRPS                                                    | <i>Colletotrichum chlorophyti</i>    | 21         | 86.95      | 0       | OLN93090         |
| NR-PKS-NRPS                                                    | <i>Tolypocladium ophioglossoides</i> | 76         | 59.97      | 0       | KND89106         |
| NR-PKS-NRPS                                                    | <i>Colletotrichum tofieldiae</i>     | 21         | 87.79      | 0       | KZL65137         |
| NR-PKS-NRPS                                                    | <i>Colletotrichum incanum</i>        | 21         | 87.79      | 0       | KZL68616         |
| NR-PKS-NRPS                                                    | <i>Colletotrichum sublineol</i>      | 21         | 88.01      | 0       | KDN66279         |
| NR-PKS-NRPS                                                    | <i>Colletotrichum simmonds</i>       | 21         | 86.72      | 0       | KXH41766         |
| NR-PKS-NRPS                                                    | <i>Colletotrichum orchidophilum</i>  | 21         | 86.45      | 0       | XP_022475083     |
| NR-PKS-NRPS                                                    | <i>Colletotrichum musicola</i>       | 21         | 86.55      | 0       | KAF6802064       |
| NR-PKS-NRPS                                                    | <i>Colletotrichum sojae</i>          | 22         | 85.22      | 0       | KAF6811701       |

| <i>Verticillium dahliae</i> contig<br>NW_009276917, VRPKS-I-11 | Species of BLAST hit             | % coverage | % identity | E-value | Accession number |
|----------------------------------------------------------------|----------------------------------|------------|------------|---------|------------------|
| R-PKS-I                                                        | <i>Colletotrichum incanum</i>    | 72         | 65.47      | 0       | KZL81424         |
| R-PKS-I                                                        | <i>Hirsutella minnesotensis</i>  | 95         | 61.28      | 6e-150  | KJZ73816         |
| R-PKS-I                                                        | <i>Ophiocordyceps sinensis</i>   | 31         | 68.91      | 2e-140  | EQK98692         |
| R-PKS-I                                                        | <i>Ophiocordyceps sinensis</i>   | 34         | 66.23      | 1e-136  | KAF4511963       |
| R-PKS-I                                                        | <i>Aspergillus novofumigatus</i> | 95         | 52.79      | 1e-121  | XP_024677790     |
| R-PKS-I                                                        | <i>Pseudomassariella vexata</i>  | 94         | 52.43      | 6e-115  | XP_040720636     |
| R-PKS-I                                                        | <i>Metarhizium majus</i>         | 94         | 54.57      | 2e-113  | KID93355         |
| R-PKS-I                                                        | <i>Monilinia fruticola</i>       | 95         | 51.84      | 9e-112  | KAG4026558       |
| R-PKS-I                                                        | <i>Monilinia fruticola</i>       | 95         | 51.84      | 1e-111  | KAA8566095       |
| R-PKS-I                                                        | <i>Pochonia chlamydosporia</i>   | 95         | 53.40      | 1e-111  | KAG8400261       |

| <i>Verticillium albo-atrum</i> contig<br>NMXJ01000004, VRPKS-I-22 | Species of BLAST hit            | % coverage | % identity | E-value | Accession number |
|-------------------------------------------------------------------|---------------------------------|------------|------------|---------|------------------|
| R-PKS-I                                                           | <i>Hyaloscypha variabilis</i>   | 91         | 46.58      | 0       | PMD43053         |
| R-PKS-I                                                           | <i>Aulographum hederae</i>      | 92         | 46.88      | 0       | KAF1988946       |
| R-PKS-I                                                           | <i>Cadophora sp. DSE1049</i>    | 91         | 46.34      | 0       | PVH88801         |
| R-PKS-I                                                           | <i>Hyaloscypha bicolor</i>      | 91         | 44.78      | 0       | XP_024734639     |
| R-PKS-I                                                           | <i>Scytalidium lignicola</i>    | 91         | 39.87      | 0       | RFU24364         |
| R-PKS-I                                                           | <i>Cadophora sp.</i>            | 91         | 45.77      | 0       | KAG4444512       |
| R-PKS-I                                                           | <i>Cadophora malorum</i>        | 91         | 45.56      | 0       | KAG4423991       |
| R-PKS-I                                                           | <i>Tothia fuscella</i>          | 91         | 45.01      | 0       | KAF2419578       |
| R-PKS-I                                                           | <i>Fusarium oxysporum</i>       | 91         | 38.30      | 0       | RKK77696         |
| R-PKS-I                                                           | <i>Hyaloscypha hepaticicola</i> | 91         | 45.77      | 0       | PMD16306         |

| <i>Verticillium albo-atrum</i> contig<br>NMXJ01000009, VRPKS-I-1 | Species of BLAST hit                 | % coverage | % identity | E-value | Accession number |
|------------------------------------------------------------------|--------------------------------------|------------|------------|---------|------------------|
| PKS-NRPS                                                         | <i>Colletotrichum fructicola</i>     | 100        | 86.09      | 0       | KAF4886526       |
| PKS-NRPS                                                         | <i>Colletotrichum fructicola</i>     | 100        | 86.04      | 0       | XP_031875985     |
| PKS-NRPS                                                         | <i>Metarhizium majus</i>             | 99         | 63.96      | 0       | KID93652         |
| PKS-NRPS                                                         | <i>Metarhizium guizhouense</i>       | 99         | 63.91      | 0       | KID82736         |
| PKS-NRPS                                                         | <i>Metarhizium robertsii</i>         | 99         | 63.80      | 0       | XP_007826303     |
| PKS-NRPS                                                         | <i>Metarhizium robertsii</i>         | 99         | 63.80      | 0       | EXU95862         |
| PKS-NRPS                                                         | <i>Xylaria grammica</i>              | 98         | 61.25      | 0       | RWA11947         |
| PKS-NRPS                                                         | <i>Thermothelomyces thermophilus</i> | 97         | 59.79      | 0       | XP_003662442     |
| PKS-NRPS                                                         | <i>Talaromyces atrovirens</i>        | 99         | 58.90      | 0       | XP_020120442     |
| PKS-NRPS                                                         | <i>Coccidioides immitis</i>          | 99         | 56.84      | 0       | XP_001242733     |

| <i>Verticillium albo-atrum</i> contig<br>NMXJ01000001, VRPKS-I-12 | Species of BLAST hit                | % coverage | % identity | E-value | Accession number |
|-------------------------------------------------------------------|-------------------------------------|------------|------------|---------|------------------|
| PKS-NRPS                                                          | <i>Sodiomyces alkalinus</i>         | 97         | 74.31      | 0       | XP_028469272     |
| PKS-NRPS                                                          | <i>Colletotrichum nymphaeae</i>     | 97         | 72.10      | 0       | KXH30697         |
| PKS-NRPS                                                          | <i>Colletotrichum salicis</i>       | 97         | 72.20      | 0       | KXH33485         |
| PKS-NRPS                                                          | <i>Colletotrichum scovillei</i>     | 97         | 72.05      | 0       | XP_035338903     |
| PKS-NRPS                                                          | <i>Colletotrichum fioriniae</i>     | 97         | 71.92      | 0       | EXF80071         |
| PKS-NRPS                                                          | <i>Colletotrichum simmondsii</i>    | 97         | 72.10      | 0       | KXH41720         |
| PKS-NRPS                                                          | <i>Colletotrichum orchidophilum</i> | 97         | 71.76      | 0       | XP_022470047     |
| PKS-NRPS                                                          | <i>Pochonia chlamydosporia</i>      | 97         | 66.01      | 0       | XP_018147207     |
| PKS-NRPS                                                          | <i>Cylindrodendrum hubeiense</i>    | 97         | 65.60      | 0       | KAF7549858       |
| PKS-NRPS                                                          | <i>Neonectria ditissima</i>         | 97         | 65.91      | 0       | KPM42068         |

| <i>Verticillium albo-atrum</i> contig<br>NMXJ01000001, VNRPKS-I-1 | Species of BLAST hit                  | % coverage | % identity | E-value | Accession number |
|-------------------------------------------------------------------|---------------------------------------|------------|------------|---------|------------------|
| NR-PKS-I                                                          | <i>Colletotrichum fructicola</i>      | 99         | 79.18      | 0       | KAF4937522       |
| NR-PKS-I                                                          | <i>Colletotrichum asianum</i>         | 99         | 79.18      | 0       | KAF0322599       |
| NR-PKS-I                                                          | <i>Colletotrichum viniferum</i>       | 99         | 79.09      | 0       | KAF4919737       |
| NR-PKS-I                                                          | <i>Colletotrichum gloeosporioides</i> | 99         | 79.18      | 0       | KAF3809075       |
| NR-PKS-I                                                          | <i>Colletotrichum karsti</i>          | 99         | 79.27      | 0       | XP_038751444     |
| NR-PKS-I                                                          | <i>Colletotrichum siamense</i>        | 99         | 79.13      | 0       | KAF4840476       |
| NR-PKS-I                                                          | <i>Colletotrichum aenigma</i>         | 99         | 79.13      | 0       | XP_037173402     |
| NR-PKS-I                                                          | <i>Colletotrichum fructicola</i>      | 99         | 79.13      | 0       | XP_031880204     |
| NR-PKS-I                                                          | <i>Colletotrichum fructicola</i>      | 99         | 79.13      | 0       | KAF4912855       |
| NR-PKS-I                                                          | <i>Colletotrichum siamense</i>        | 99         | 79.13      | 0       | XP_036489117     |

| <i>Verticillium albo-atrum</i> contig<br>NMXJ01000001, VRPKS-I-9 | Species of BLAST hit            | % coverage | % identity | E-value | Accession number |
|------------------------------------------------------------------|---------------------------------|------------|------------|---------|------------------|
| PKS-NRPS                                                         | <i>Monosporascus sp</i>         | 99         | 49.78      | 0       | RYP45085         |
| PKS-NRPS                                                         | <i>Hirsutella minnesotensis</i> | 98         | 68.09      | 0       | KJZ73816         |
| PKS-NRPS                                                         | <i>Pseudomassariella vexata</i> | 86         | 47.30      | 0       | XP_040720636     |
| PKS-NRPS                                                         | <i>Metarhizium guizhouense</i>  | 90         | 44.54      | 0       | KID82218         |
| PKS-NRPS                                                         | <i>Metarhizium majus</i>        | 90         | 44.75      | 0       | KID93355         |
| PKS-NRPS                                                         | <i>Metarhizium anisopliae</i>   | 90         | 44.41      | 0       | KJK77205         |
| PKS-NRPS                                                         | <i>Metarhizium anisopliae</i>   | 89         | 44.40      | 0       | KFG80765         |
| PKS-NRPS                                                         | <i>Metarhizium robertsii</i>    | 89         | 44.01      | 0       | XP_007817815     |
| PKS-NRPS                                                         | <i>Metarhizium brunneum</i>     | 90         | 44.03      | 0       | XP_014539400     |
| PKS-NRPS                                                         | <i>Pseudogymnoascus sp</i>      | 99         | 40.17      | 0       | OBT39531         |

| <i>Verticillium albo-atrum</i> contig<br>NMXJ01000001, VRPKS-I-17 | Species of BLAST hit              | % coverage | % identity | E-value | Accession number |
|-------------------------------------------------------------------|-----------------------------------|------------|------------|---------|------------------|
| R-PKS-I                                                           | <i>Colletotrichum truncatum</i>   | 99         | 71.66      | 0       | XP_036585096     |
| R-PKS-I                                                           | <i>Colletotrichum chlorophyti</i> | 99         | 72.28      | 0       | OLN86478         |
| R-PKS-I                                                           | <i>Colletotrichum trifolii</i>    | 99         | 71.63      | 0       | TDZ28230         |
| R-PKS-I                                                           | <i>Colletotrichum orbiculare</i>  | 99         | 71.67      | 0       | TDZ25780         |
| R-PKS-I                                                           | <i>Colletotrichum sidae</i>       | 99         | 71.63      | 0       | TEA18683         |
| R-PKS-I                                                           | <i>Colletotrichum spinosum</i>    | 99         | 71.58      | 0       | TDZ31026         |
| R-PKS-I                                                           | <i>Colletotrichum sojae</i>       | 99         | 71.43      | 0       | KAF6806435       |
| R-PKS-I                                                           | <i>Colletotrichum nymphaeae</i>   | 99         | 71.58      | 0       | KXH49587         |
| R-PKS-I                                                           | <i>Colletotrichum musicola</i>    | 99         | 71.52      | 0       | KAF6830768       |
| R-PKS-I                                                           | <i>Colletotrichum fioriniae</i>   | 99         | 71.47      | 0       | EXF85385         |

| <i>Verticillium albo-atrum</i> contig<br>NMXJ01000001, VRPKS-I-23 | Species of BLAST hit | % coverage | % identity | E-value | Accession number |
|-------------------------------------------------------------------|----------------------|------------|------------|---------|------------------|
|-------------------------------------------------------------------|----------------------|------------|------------|---------|------------------|

|         |                                       |    |       |   |              |
|---------|---------------------------------------|----|-------|---|--------------|
| R-PKS-I | <i>Sodiomyces alkalinus</i>           | 89 | 51.24 | 0 | XP_028462492 |
| R-PKS-I | <i>Colletotrichum incanum</i>         | 87 | 44.61 | 0 | OHW97630     |
| R-PKS-I | <i>Colletotrichum gloeosporioides</i> | 86 | 44.53 | 0 | KAF3797175   |
| R-PKS-I | <i>Colletotrichum aenigma</i>         | 86 | 44.87 | 0 | XP_037174401 |
| R-PKS-I | <i>Colletotrichum siamense</i>        | 86 | 44.72 | 0 | XP_036490386 |
| R-PKS-I | <i>Colletotrichum tropicale</i>       | 86 | 44.68 | 0 | KAF4828937   |
| R-PKS-I | <i>Colletotrichum asianum</i>         | 86 | 44.57 | 0 | KAF0329849   |
| R-PKS-I | <i>Colletotrichum fructicola</i>      | 86 | 44.57 | 0 | XP_031892623 |
| R-PKS-I | <i>Colletotrichum tanacetii</i>       | 87 | 44.96 | 0 | TKW51389     |
| R-PKS-I | <i>Colletotrichum fructicola</i>      | 86 | 44.57 | 0 | KAF5488909   |

|                                                                   |                                    |            |            |         |                  |
|-------------------------------------------------------------------|------------------------------------|------------|------------|---------|------------------|
| <i>Verticillium albo-atrum</i> contig<br>NMXJ01000003, VRPKS-I-25 | Species of BLAST hit               | % coverage | % identity | E-value | Accession number |
| R-PKS-I                                                           | <i>Stachybotrys chartarum</i>      | 88         | 73.91      | 0       | KEY68922         |
| R-PKS-I                                                           | <i>Stachybotrys chartarum</i>      | 99         | 73.91      | 0       | KFA46917         |
| R-PKS-I                                                           | <i>Physcia stellaris</i>           | 98         | 41.19      | 0       | KAG7001446       |
| R-PKS-I                                                           | <i>Stachybotrys chartarum</i>      | 97         | 71.92      | 0       | KFA72420         |
| R-PKS-I                                                           | <i>Monosporascus sp.</i>           | 98         | 55.77      | 0       | RYP80513         |
| R-PKS-I                                                           | <i>Monosporascus ibericus</i>      | 99         | 55.20      | 0       | RYP07817         |
| R-PKS-I                                                           | <i>Scytalidium lignicola</i>       | 98         | 55.68      | 0       | RFU27489         |
| R-PKS-I                                                           | <i>Chlorociboria aeruginascens</i> | 98         | 54.57      | 0       | TAQ85507         |
| R-PKS-I                                                           | <i>Monosporascus cannonballus</i>  | 97         | 55.07      | 0       | RYO84498         |
| R-PKS-I                                                           | <i>Monosporascus sp.</i>           | 97         | 55.07      | 0       | RYP15912         |

|                                                                   |                                   |            |            |         |                  |
|-------------------------------------------------------------------|-----------------------------------|------------|------------|---------|------------------|
| <i>Verticillium albo-atrum</i> contig<br>NMXJ01000003, VRPKS-I-24 | Species of BLAST hit              | % coverage | % identity | E-value | Accession number |
| R-PKS-I                                                           | <i>Cylindrodendrum habeiensis</i> | 99         | 63.30      | 0       | KAF7552999       |
| R-PKS-I                                                           | <i>Hyaloscypha variabilis</i>     | 99         | 62.39      | 0       | PMD46834         |

|         |                                          |     |       |   |              |
|---------|------------------------------------------|-----|-------|---|--------------|
| R-PKS-I | <i>Viridothelium virens</i>              | 100 | 55.16 | 0 | KAF2232763   |
| R-PKS-I | <i>Zopfia rhizophila</i>                 | 100 | 55.78 | 0 | KAF2195930   |
| R-PKS-I | <i>Pseudogymnoascus sp.</i>              | 99  | 54.53 | 0 | KFY28507     |
| R-PKS-I | <i>Trichoderma arundinaceum</i>          | 100 | 53.08 | 0 | RFU79720     |
| R-PKS-I | <i>Zopfia rhizophila</i>                 | 100 | 54.25 | 0 | KAF2195889   |
| R-PKS-I | <i>Ascochyta lentis</i>                  | 99  | 53.19 | 0 | KAF9696958   |
| R-PKS-I | <i>Letharia columbiana</i>               | 99  | 51.32 | 0 | XP_037161903 |
| R-PKS-I | <i>Cladonia uncialis subsp. uncialis</i> | 99  | 51.33 | 0 | ANM86582     |

|                                                                |                           |            |            |         |                  |
|----------------------------------------------------------------|---------------------------|------------|------------|---------|------------------|
| <i>Verticillium albo-atrum</i> contig NMXJ01000003, VRPKS-I-19 | Species of BLAST hit      | % coverage | % identity | E-value | Accession number |
| R-PKS-I                                                        | <i>Epichloe festucae</i>  | 99         | 63.26      | 0       | QPH02303         |
| R-PKS-I                                                        | <i>Claviceps pusilla</i>  | 99         | 62.97      | 0       | KAG6001262       |
| R-PKS-I                                                        | <i>Claviceps purpurea</i> | 99         | 63.01      | 0       | KAG6209081       |
| R-PKS-I                                                        | <i>Claviceps purpurea</i> | 99         | 63.06      | 0       | KAG6144460       |
| R-PKS-I                                                        | <i>Metarhizium rileyi</i> | 99         | 62.73      | 0       | OAA35905         |
| R-PKS-I                                                        | <i>Claviceps purpurea</i> | 99         | 62.86      | 0       | KAG6152537       |
| R-PKS-I                                                        | <i>Claviceps purpurea</i> | 99         | 62.91      | 0       | KAG6172346       |
| R-PKS-I                                                        | <i>Claviceps purpurea</i> | 99         | 62.96      | 0       | KAG6178588       |
| R-PKS-I                                                        | <i>Claviceps purpurea</i> | 99         | 62.96      | 0       | KAG6168136       |
| R-PKS-I                                                        | <i>Claviceps purpurea</i> | 99         | 63.01      | 0       | KAG6319079       |

|                                                               |                                    |            |            |         |                  |
|---------------------------------------------------------------|------------------------------------|------------|------------|---------|------------------|
| <i>Verticillium albo-atrum</i> contig NMXJ01000006, VRPKS-I-5 | Species of BLAST hit               | % coverage | % identity | E-value | Accession number |
| PKS-NRPS                                                      | <i>Botrytis tulipae</i>            | 100        | 62.50      | 0       | TGO20046         |
| PKS-NRPS                                                      | <i>Botryotinia calthae</i>         | 100        | 62.25      | 0       | TEY65541         |
| PKS-NRPS                                                      | <i>Botrytis galanthina</i>         | 99         | 62.19      | 0       | THV46179         |
| PKS-NRPS                                                      | <i>Chlorociboria aeruginascens</i> | 99         | 49.32      | 0       | TAQ90374         |

|          |                             |     |       |   |            |
|----------|-----------------------------|-----|-------|---|------------|
| PKS-NRPS | <i>Rutstroemia sp.</i>      | 100 | 44.64 | 0 | PQE13487   |
| PKS-NRPS | <i>Rutstroemia sp.</i>      | 100 | 44.49 | 0 | PQE27755   |
| PKS-NRPS | <i>Monosporascus sp.</i>    | 99  | 43.46 | 0 | RYP90391   |
| PKS-NRPS | <i>Penicillium italicum</i> | 99  | 42.91 | 0 | KGO65245   |
| PKS-NRPS | <i>Polytolypa hystricis</i> | 99  | 43.16 | 0 | PGH21386   |
| PKS-NRPS | <i>Chalara longipes</i>     | 99  | 43.37 | 0 | KAE9373525 |

|                                                                   |                                       |            |            |         |                  |
|-------------------------------------------------------------------|---------------------------------------|------------|------------|---------|------------------|
| <i>Verticillium albo-atrum</i> contig<br>NMXJ01000007, VRPKS-I-26 | Species of BLAST hit                  | % coverage | % identity | E-value | Accession number |
| R-PKS-I                                                           | <i>Monosporascus sp. mg162</i>        | 78         | 56.29      | 0       | RYP50633         |
| R-PKS-I                                                           | <i>Arthrinium phaeospermum</i>        | 75         | 56.29      | 0       | P0CU84           |
| R-PKS-I                                                           | <i>Lasiodiplodia theobromae</i>       | 74         | 40.54      | 0       | XP_035363749     |
| R-PKS-I                                                           | <i>Colletotrichum gloeosporioides</i> | 19         | 70.92      | 0       | KAF3800899       |
| R-PKS-I                                                           | <i>Colletotrichum camelliae</i>       | 19         | 70.38      | 0       | KAG2086927       |
| R-PKS-I                                                           | <i>Colletotrichum gloeosporioides</i> | 19         | 70.92      | 0       | EQB58169         |
| R-PKS-I                                                           | <i>Colletotrichum karst</i>           | 19         | 70.85      | 0       | XP_038744071     |
| R-PKS-I                                                           | <i>Coniochaeta sp.</i>                | 19         | 73.20      | 0       | KAB5518934       |
| R-PKS-I                                                           | <i>Colletotrichum aenigma</i>         | 19         | 70.71      | 0       | XP_037177975     |
| R-PKS-I                                                           | <i>Colletotrichum plurivorum</i>      | 19         | 70.55      | 0       | KAF6834567       |

|                                                                  |                                    |            |            |         |                  |
|------------------------------------------------------------------|------------------------------------|------------|------------|---------|------------------|
| <i>Verticillium albo-atrum</i> contig<br>NMXJ01000002, VRPKS-I-3 | Species of BLAST hit               | % coverage | % identity | E-value | Accession number |
| PKS-NRPS                                                         | <i>Colletotrichum truncatum</i>    | 86         | 67.40      | 0       | XP_036576988     |
| PKS-NRPS                                                         | <i>Colletotrichum higginsianum</i> | 86         | 63.17      | 0       | AFI23580         |
| PKS-NRPS                                                         | <i>Colletotrichum higginsianum</i> | 86         | 62.87      | 0       | XP_018161565     |
| PKS-NRPS                                                         | <i>Colletotrichum tofie</i>        | 86         | 62.52      | 0       | KZL75527         |
| PKS-NRPS                                                         | <i>Colletotrichum spinosum</i>     | 86         | 61.78      | 0       | TDZ28122         |

|          |                                  |    |       |   |            |
|----------|----------------------------------|----|-------|---|------------|
| PKS-NRPS | <i>Colletotrichum orbiculare</i> | 86 | 61.61 | 0 | TDZ24970   |
| PKS-NRPS | <i>Colletotrichum sidae</i>      | 86 | 61.66 | 0 | TEA13957   |
| PKS-NRPS | <i>Colletotrichum camelliae</i>  | 86 | 61.94 | 0 | KAG2095187 |
| PKS-NRPS | <i>Colletotrichum trifolii</i>   | 86 | 61.28 | 0 | TDZ60804   |
| PKS-NRPS | <i>Colletotrichum viniferum</i>  | 86 | 61.96 | 0 | KAF4926162 |

|                                                                |                                    |            |            |         |                  |
|----------------------------------------------------------------|------------------------------------|------------|------------|---------|------------------|
| <i>Verticillium albo-atrum</i> contig<br>NMXJ01000005, PKS-III | Species of BLAST hit               | % coverage | % identity | E-value | Accession number |
| PKS-III                                                        | <i>Colletotrichum simmondsii</i>   | 100        | 73.79      | 0       | KXH46773         |
| PKS-III                                                        | <i>Colletotrichum tofieldiae</i>   | 100        | 74.67      | 0       | KZL74511         |
| PKS-III                                                        | <i>Colletotrichum chlorophyti</i>  | 100        | 73.79      | 0       | OLN95986         |
| PKS-III                                                        | <i>Colletotrichum scovillei</i>    | 100        | 73.57      | 0       | XP_035333635     |
| PKS-III                                                        | <i>Colletotrichum incanum</i>      | 100        | 74.45      | 0       | KZL80557         |
| PKS-III                                                        | <i>Colletotrichum sublineola</i>   | 100        | 74.01      | 0       | KDN65911         |
| PKS-III                                                        | <i>Colletotrichum graminicola</i>  | 100        | 74.89      | 0       | XP_008099452     |
| PKS-III                                                        | <i>Colletotrichum incanum</i>      | 100        | 74.23      | 0       | OHW96035         |
| PKS-III                                                        | <i>Colletotrichum higginsianum</i> | 100        | 74.01      | 0       | XP_018159249     |
| PKS-III                                                        | <i>Colletotrichum tanacetii</i>    | 100        | 74.01      | 0       | TKW57803         |

|                                                                 |                                   |            |            |         |                  |
|-----------------------------------------------------------------|-----------------------------------|------------|------------|---------|------------------|
| <i>Verticillium alfalfae</i> contig<br>NW_003315037, VRPKS-I-16 | Species of BLAST hit              | % coverage | % identity | E-value | Accession number |
| R-PKS-I                                                         | <i>Fusarium miscanthi</i>         | 100        | 70.92      | 0       | ALQ32877         |
| R-PKS-I                                                         | <i>Fusarium denticulatum</i>      | 100        | 71.25      | 0       | KAF5687147       |
| R-PKS-I                                                         | <i>Fusarium mexicanum</i>         | 97         | 70.97      | 0       | KAF5539484       |
| R-PKS-I                                                         | <i>Fusarium acutatum</i>          | 98         | 72.09      | 0       | KAF4428951       |
| R-PKS-I                                                         | <i>Fusarium sp</i>                | 99         | 73.41      | 0       | KAF5020446       |
| R-PKS-I                                                         | <i>Fusarium subglutinans</i>      | 100        | 71.68      | 0       | XP_036534733     |
| R-PKS-I                                                         | <i>Fusarium pseudoanthophilum</i> | 99         | 70.89      | 0       | KAF5573817       |
| R-PKS-I                                                         | <i>Fusarium sarcochroum</i>       | 100        | 71.52      | 0       | KAF4944666       |
| R-PKS-I                                                         | <i>Fusarium sacchari</i>          | 100        | 71.63      | 0       | ALQ32937         |
| R-PKS-I                                                         | <i>Fusarium aywerte</i>           | 100        | 69.78      | 0       | ALQ32768         |



| <i>Verticillium alfalfae</i> contig<br>NW_003315037, VRPKS-I-17 | Species of BLAST hit              | % coverage | % identity | E-value | Accession number |
|-----------------------------------------------------------------|-----------------------------------|------------|------------|---------|------------------|
| R-PKS-I                                                         | <i>Sodiomyces alkalinus</i>       | 98         | 50.06      | 0       | XP_028462492     |
| R-PKS-I                                                         | <i>Colletotrichum gloeosporio</i> | 96         | 44.56      | 0       | KAF3797175       |
| R-PKS-I                                                         | <i>Colletotrichum karsti</i>      | 98         | 43.45      | 0       | XP_038741012     |
| R-PKS-I                                                         | <i>Colletotrichum chlorophyti</i> | 98         | 44.56      | 0       | OLN85715         |
| R-PKS-I                                                         | <i>Colletotrichum aenigma</i>     | 96         | 44         | 0       | XP_037174401     |
| R-PKS-I                                                         | <i>Colletotrichum fructicola</i>  | 99         | 42.98      | 0       | XP_031892623     |
| R-PKS-I                                                         | <i>Colletotrichum fructicola</i>  | 98         | 44.32      | 0       | KAF5488909       |
| R-PKS-I                                                         | <i>Colletotrichum incanum</i>     | 99         | 41.85      | 0       | OHW97630         |
| R-PKS-I                                                         | <i>Colletotrichum viniferum</i>   | 96         | 45.85      | 0       | KAF4918834       |
| R-PKS-I                                                         | <i>Colletotrichum tropicale</i>   | 95         | 44.09      | 0       | KAF4828937       |

| <i>Verticillium alfalfae</i> contig<br>NW_003315034, VRPKS-I-9 | Species of BLAST hit              | % coverage | % identity | E-value | Accession number |
|----------------------------------------------------------------|-----------------------------------|------------|------------|---------|------------------|
| PKS-NRPS                                                       | <i>Acremonium chrysogenum</i>     | 99         | 44.13      | 0       | KFH45364         |
| PKS-NRPS                                                       | <i>Pseudomassariella vexata</i>   | 98         | 41.40      | 0       | XP_040711562     |
| PKS-NRPS                                                       | <i>Lasiodiplodia theobromae</i>   | 99         | 39.48      | 0       | KAF9630276       |
| PKS-NRPS                                                       | <i>Lasiodiplodia theobromae</i>   | 99         | 39.45      | 0       | KAB2573439       |
| PKS-NRPS                                                       | <i>Lasiodiplodia theobromae</i>   | 99         | 39.23      | 0       | XP_035374836     |
| PKS-NRPS                                                       | <i>Aplosporella prunicola</i>     | 99         | 39.41      | 0       | XP_033401020     |
| PKS-NRPS                                                       | <i>Elaphomyces granulatus</i>     | 99         | 38.46      | 0       | OXV07567         |
| PKS-NRPS                                                       | <i>Talaromyces stipitatus</i>     | 99         | 37.01      | 0       | XP_002478535     |
| PKS-NRPS                                                       | <i>Aspergillus carbonarius</i>    | 99         | 37.77      | 0       | OOF95055         |
| PKS-NRPS                                                       | <i>Aspergillus sclerotioniger</i> | 99         | 37.99      | 0       | XP_025471949     |

| <i>Verticillium alfalfae</i> contig<br>NW_003315034, VRPKS-I-5 | Species of BLAST hit                        | % coverage | % identity | E-value | Accession number |
|----------------------------------------------------------------|---------------------------------------------|------------|------------|---------|------------------|
| PKS-NRPS                                                       | <i>Massariosphaeria phaeospora</i>          | 99         | 44.38      | 0       | KAF2874833       |
| PKS-NRPS                                                       | <i>Phialocephala subalpina</i>              | 99         | 43.26      | 0       | CZR58354         |
| PKS-NRPS                                                       | <i>Coccidioides posadasii str. Silveira</i> | 99         | 43.55      | 0       | EFW16137         |
| PKS-NRPS                                                       | <i>Coccidioides immitis</i>                 | 99         | 43.44      | 0       | TPX24000         |

|          |                               |    |       |   |              |
|----------|-------------------------------|----|-------|---|--------------|
| PKS-NRPS | <i>Coccidioides immitis</i>   | 99 | 43.37 | 0 | XP_001242733 |
| PKS-NRPS | <i>Coccidioides posadasii</i> | 99 | 43.40 | 0 | XP_003069897 |
| PKS-NRPS | <i>Pseudogymnoascus sp.</i>   | 99 | 43.07 | 0 | KFZ23096     |
| PKS-NRPS | <i>Saccharata proteae</i>     | 99 | 43.26 | 0 | KAF2084690   |
| PKS-NRPS | <i>Pseudogymnoascus sp</i>    | 99 | 43.05 | 0 | KFZ13457     |
| PKS-NRPS | <i>Pseudogymnoascus sp.</i>   | 99 | 42.92 | 0 | KFX98753     |

|                                                                 |                                   |            |            |         |                  |
|-----------------------------------------------------------------|-----------------------------------|------------|------------|---------|------------------|
| <i>Verticillium alfalfae</i> contig<br>NW_003315038, VRPKS-I-19 | Species of BLAST hit              | % coverage | % identity | E-value | Accession number |
| R-PKS-I                                                         | <i>Colletotrichum chlorophyti</i> | 99         | 71.25      | 0       | OLN86478         |
| R-PKS-I                                                         | <i>Colletotrichum truncatum</i>   | 99         | 70         | 0       | XP_036585096     |
| R-PKS-I                                                         | <i>Colletotrichum orbiculare</i>  | 99         | 69.58      | 0       | TDZ25780         |
| R-PKS-I                                                         | <i>Colletotrichum trifolii</i>    | 99         | 70.69      | 0       | TDZ28230         |
| R-PKS-I                                                         | <i>Colletotrichum sidae</i>       | 99         | 68.98      | 0       | TEA18683         |
| R-PKS-I                                                         | <i>Colletotrichum spinosum</i>    | 99         | 69         | 0       | TDZ31026         |
| R-PKS-I                                                         | <i>Colletotrichum musicola</i>    | 99         | 69.69      | 0       | KAF6830768       |
| R-PKS-I                                                         | <i>Colletotrichum fioriniae</i>   | 99         | 70.35      | 0       | EXF85385         |
| R-PKS-I                                                         | <i>Colletotrichum salicis</i>     | 99         | 70.55      | 0       | KXH66496         |
| R-PKS-I                                                         | <i>Colletotrichum scovillei</i>   | 99         | 68.39      | 0       | XP_035338972     |

|                                                                 |                                       |            |            |         |                  |
|-----------------------------------------------------------------|---------------------------------------|------------|------------|---------|------------------|
| <i>Verticillium alfalfae</i> contig<br>NW_003315038, VNRPKS-I-1 | Species of BLAST hit                  | % coverage | % identity | E-value | Accession number |
| NR-PKS-I                                                        | <i>Colletotrichum karsti</i>          | 99         | 79.25      | 0       | XP_038751444     |
| NR-PKS-I                                                        | <i>Colletotrichum higginsianum</i>    | 99         | 79.26      | 0       | TIC92505         |
| NR-PKS-I                                                        | <i>Colletotrichum higginsianum</i>    | 99         | 79.18      | 0       | XP_018155915     |
| NR-PKS-I                                                        | <i>Colletotrichum higginsianum</i>    | 99         | 79.18      | 0       | CCF45141         |
| NR-PKS-I                                                        | <i>Colletotrichum gloeosporioides</i> | 99         | 79.39      | 0       | EQB55056         |

|          |                                       |    |       |   |            |
|----------|---------------------------------------|----|-------|---|------------|
| NR-PKS-I | <i>Colletotrichum gloeosporioides</i> | 99 | 79.37 | 0 | KAF3809075 |
| NR-PKS-I | <i>Colletotrichum tropicale</i>       | 99 | 79.88 | 0 | KAF4827098 |
| NR-PKS-I | <i>Colletotrichum asianum</i>         | 99 | 79.12 | 0 | KAF0322599 |
| NR-PKS-I | <i>Colletotrichum fructicola</i>      | 99 | 79.19 | 0 | KAF4937522 |
| NR-PKS-I | <i>Colletotrichum siamense</i>        | 99 | 76.27 | 0 | KAF4812766 |

|                                                                |                                             |            |            |         |                  |
|----------------------------------------------------------------|---------------------------------------------|------------|------------|---------|------------------|
| <i>Verticillium alfalfae</i> contig<br>NW_003315038, VRPKS-I-1 | Species of BLAST hit                        | % coverage | % identity | E-value | Accession number |
| PKS-NRPS                                                       | <i>Massariosphaeria phaeospora</i>          | 99         | 52.92      | 0       | KAF2874833       |
| PKS-NRPS                                                       | <i>Phialocephala subalpina</i>              | 99         | 52.91      | 0       | CZR58354         |
| PKS-NRPS                                                       | <i>Coccidioides posadasii str. Silveira</i> | 99         | 51.19      | 0       | EFW16137         |
| PKS-NRPS                                                       | <i>Coccidioides immitis</i>                 | 99         | 51.92      | 0       | TPX24000         |
| PKS-NRPS                                                       | <i>Coccidioides immitis</i>                 | 99         | 55.77      | 0       | XP_001242733     |
| PKS-NRPS                                                       | <i>Coccidioides posadasii</i>               | 99         | 55.20      | 0       | XP_003069897     |
| PKS-NRPS                                                       | <i>Pseudogymnoascus sp.</i>                 | 99         | 55.68      | 0       | KFZ23096         |
| PKS-NRPS                                                       | <i>Saccharata proteae</i>                   | 99         | 54.57      | 0       | KAF2084690       |
| PKS-NRPS                                                       | <i>Pseudogymnoascus sp</i>                  | 99         | 55.07      | 0       | KFZ13457         |
| PKS-NRPS                                                       | <i>Pseudogymnoascus sp.</i>                 | 99         | 55.07      | 0       | KFX98753         |

|                                                                  |                           |            |            |         |                  |
|------------------------------------------------------------------|---------------------------|------------|------------|---------|------------------|
| ) <i>Verticillium alfalfae</i> contig<br>NW_003315032, VRPKS-I-9 | Species of BLAST hit      | % coverage | % identity | E-value | Accession number |
| R-PKS-I                                                          | <i>Claviceps citina</i>   | 100        | 67.40      | 0       | KAG6041353       |
| R-PKS-I                                                          | <i>Claviceps purpurea</i> | 100        | 63.17      | 0       | KAG6264852       |
| R-PKS-I                                                          | <i>Claviceps purpurea</i> | 100        | 62.87      | 0       | KAG6172346       |
| R-PKS-I                                                          | <i>Claviceps purpurea</i> | 100        | 62.52      | 0       | KAG6313294       |
| R-PKS-I                                                          | <i>Claviceps purpurea</i> | 100        | 61.78      | 0       | KAG6257628       |
| R-PKS-I                                                          | <i>Claviceps purpurea</i> | 100        | 61.61      | 0       | KAG6178588.      |

|         |                           |     |       |   |            |
|---------|---------------------------|-----|-------|---|------------|
| R-PKS-I | <i>Claviceps purpurea</i> | 100 | 61.66 | 0 | KAG6319079 |
| R-PKS-I | <i>Claviceps purpurea</i> | 100 | 61.94 | 0 | KAG6144460 |
| R-PKS-I | <i>Claviceps purpurea</i> | 100 | 61.28 | 0 | KAG6278039 |
| R-PKS-I | <i>Claviceps purpurea</i> | 100 | 61.96 | 0 | KAG6303654 |

34) *Verticillium alfalfae* contig NW\_003315025, VRPKS-I-26

| <i>Verticillium alfalfae</i> contig<br>NW_003315025, VRPKS-I-26 | Species of BLAST hit            | % coverage | % identity | E-value | Accession number |
|-----------------------------------------------------------------|---------------------------------|------------|------------|---------|------------------|
| R-PKS-I                                                         | <i>Monosporascus sp</i>         | 95         | 65.31      | 0       | RYP50633         |
| R-PKS-I                                                         | <i>Arthrinium phaeospermum</i>  | 94         | 62.55      | 0       | P0CU84           |
| R-PKS-I                                                         | <i>Verticillium longisporum</i> | 94         | 62.28      | 0       | CRK37551         |
| R-PKS-I                                                         | <i>Verticillium longisporum</i> | 94         | 61.71      | 0       | CRK33507         |
| R-PKS-I                                                         | <i>Didymosphaeria enalia</i>    | 94         | 61.33      | 0       | KAF2259783       |
| R-PKS-I                                                         | <i>Lachnellula willkommii</i>   | 94         | 61.24      | 0       | TVY89575         |
| R-PKS-I                                                         | <i>Lophiotrema nucula</i>       | 94         | 60.47      | 0       | KAF2119266       |
| R-PKS-I                                                         | <i>Lachnellula arida</i>        | 94         | 60.21      | 0       | TVY19100         |
| R-PKS-I                                                         | <i>Rutstroemia sp.</i>          | 94         | 59.88      | 0       | PQE16274         |
| R-PKS-I                                                         | <i>Aspergillus puulaa</i>       | 94         | 58.57      | 0       | XP_041560187     |

| <i>Verticillium alfalfae</i> contig<br>NW_003315023, NR-PKS-I-B | Species of BLAST hit                 | % coverage | % identity | E-value | Accession number |
|-----------------------------------------------------------------|--------------------------------------|------------|------------|---------|------------------|
| NR-PKS-NRPS                                                     | <i>Tolypocladium ophioglossoides</i> | 94         | 56.33      | 0       | KND89106         |
| NR-PKS-NRPS                                                     | <i>Sodiomyces alkalinus</i>          | 94         | 55.21      | 0       | XP_028463040     |
| NR-PKS-NRPS                                                     | <i>Colletotrichum chlorophyti</i>    | 92         | 55.20      | 0       | OLN93090         |
| NR-PKS-NRPS                                                     | <i>Colletotrichum tofieldiae</i>     | 91         | 56.21      | 0       | KZL65137         |
| NR-PKS-NRPS                                                     | <i>Colletotrichum incanum</i>        | 86         | 56.89      | 0       | KZL68616         |
| NR-PKS-NRPS                                                     | <i>Colletotrichum sublineol</i>      | 86         | 56.74      | 0       | KDN66279         |
| NR-PKS-NRPS                                                     | <i>Colletotrichum simmonds</i>       | 85         | 56.34      | 0       | KXH41766         |

|             |                                     |    |       |   |              |
|-------------|-------------------------------------|----|-------|---|--------------|
| NR-PKS-NRPS | <i>Colletotrichum orchidophilum</i> | 83 | 55.34 | 0 | XP_022475083 |
| NR-PKS-NRPS | <i>Colletotrichum musicola</i>      | 82 | 56.21 | 0 | KAF6802064   |
| NR-PKS-NRPS | <i>Colletotrichum sojae</i>         | 82 | 55.51 | 0 | KAF6811701   |

| <i>Verticillium alfalfae</i> contig<br>NW_003315025, PKS-III | Species of BLAST hit              | % coverage | % identity | E-value | Accession number |
|--------------------------------------------------------------|-----------------------------------|------------|------------|---------|------------------|
| PKS-III                                                      | <i>Colletotrichum chlorophyti</i> | 100        | 72.57      | 0       | OLN95986         |
| PKS-III                                                      | <i>Colletotrichum tanacetii</i>   | 100        | 72.56      | 0       | TKW57803         |
| PKS-III                                                      | <i>Colletotrichum tofieldiae</i>  | 100        | 72.54      | 0       | KZL74511         |
| PKS-III                                                      | <i>Colletotrichum sublineola</i>  | 100        | 71.89      | 0       | KDN65911         |
| PKS-III                                                      | <i>Colletotrichum incanum</i>     | 100        | 72.12      | 0       | KZL80557         |
| PKS-III                                                      | <i>Colletotrichum graminicola</i> | 100        | 71.06      | 0       | XP_008099452     |
| PKS-III                                                      | <i>Colletotrichum incanum</i>     | 100        | 72.14      | 0       | OHW96035         |
| PKS-III                                                      | <i>Colletotrichum simmondsii</i>  | 100        | 71.48      | 0       | KXH46773         |
| PKS-III                                                      | <i>Colletotrichum camelliae</i>   | 100        | 71.35      | 0       | KAG2100071       |
| PKS-III                                                      | <i>Colletotrichum karsti</i>      | 100        | 71.29      | 0       | XP_038745402     |

| <i>V. isaacii</i> _VRPKS-I-16_contig_NMXN01000002 |                                            |          |            |            |                  |
|---------------------------------------------------|--------------------------------------------|----------|------------|------------|------------------|
| Gene name                                         | Species of blast hit                       | E value  | % Coverage | % identity | Accession number |
| putative polyketide synthase                      | <i>Plectosphaerella cucumerina</i>         | 0.00E+00 | 99%        | 71.74%     | KAH7369281.1     |
| putative polyketide synthase                      | <i>Plectosphaerella plurivora</i>          | 0        | 99%        | 71.18%     | KAH6673997.1     |
| hypothetical protein K402DRAFT_461387             | <i>Aulographum hederarum CBS 113979</i>    | 0.00E+00 | 99%        | 49.49%     | KAF1988946.1     |
| hypothetical protein L207DRAFT_422368             | <i>Hyaloscypha variabilis F</i>            | 0        | 99%        | 48.19%     | PMD43053.1       |
| hypothetical protein DL98DRAFT_477463             | <i>Cadophora sp. DSE1049</i>               | 0        | 99%        | 47.60%     | PVH88801.1       |
| uncharacterized protein K444DRAFT_592521          | <i>Hyaloscypha bicolor E</i>               | 0.00E+00 | 99%        | 47.60%     | XP_024734639.1   |
| hypothetical protein IFR05_000103                 | <i>Cadophora sp. M221</i>                  | 0.00E+00 | 99%        | 46.99%     | KAG4444512.1     |
| putative polyketide synthase                      | <i>Tothia fuscella</i>                     | 0.00E+00 | 99%        | 47.12%     | KAF2419578.1     |
| hypothetical protein NA56DRAFT_673334             | <i>Hyaloscypha hepaticicola</i>            | 0.00E+00 | 99%        | 45.16%     | PMD16306.1       |
| putative polyketide synthase                      | <i>Leptodontidium sp. MPI-SDFR-AT-0119</i> | 0        | 98%        | 43.93%     | KAH6715845.1     |

|                                                                        |                                          |          |            |            |                  |
|------------------------------------------------------------------------|------------------------------------------|----------|------------|------------|------------------|
| <i>V. isaacii</i> _VRPKS-I-23_contig_NMXN01000005                      |                                          |          |            |            |                  |
| Gene name                                                              | Species of blast hit                     | E value  | % Coverage | % identity | Accession number |
| phenolphthiocerol synthesis polyketide synthase ppsA                   | <i>Sodiomyces alkalinus F11</i>          | 0        | 99%        | 51.79%     | XP_028462492.1   |
| polyketide synthase                                                    | <i>Verticillium nonalfalfae</i>          | 0        | 95%        | 65.66%     | XP_028490525.1   |
| phenolphthiocerol synthesis polyketide synthase ppsA                   | <i>Plectosphaerella plurivora</i>        | 0.00E+00 | 99%        | 45.55%     | KAH6697431.1     |
| phenolphthiocerol synthesis polyketide synthase ppsA                   | <i>Plectosphaerella cucumerina</i>       | 0.00E+00 | 99%        | 45.01%     | KAH7358949.1     |
| beta-ketoacyl synthase domain-containing protein                       | <i>Colletotrichum incanum</i>            | 0        | 99%        | 45.17%     | OHW97630.1       |
| polyketide synthase (beta-ketoacyl synthase domain-containing protein) | <i>Colletotrichum tofieldiae</i>         | 0        | 98%        | 45.40%     | KZL67886.1       |
| Lovastatin diketide synthase LovF 13                                   | <i>Colletotrichum chlorophyti</i>        | 0        | 99%        | 44.36%     | OLN85715.1       |
| beta-ketoacyl synthase domain-containing protein                       | <i>Colletotrichum graminicola M1.001</i> | 0        | 98%        | 45.60%     | XP_008090783.1   |
| beta-ketoacyl synthase domain-containing protein                       | <i>Colletotrichum karsti</i>             | 0.00E+00 | 98%        | 44.69%     | XP_038741012.1   |
| Reducing polyketide synthase FUB1                                      | <i>Colletotrichum gloeosporioides</i>    | 0.00E+00 | 98%        | 45.28%     | XP_045256339.1   |

|                                                                                                                                             |                                     |          |            |            |                  |
|---------------------------------------------------------------------------------------------------------------------------------------------|-------------------------------------|----------|------------|------------|------------------|
| <i>V. isaacii</i> _VRPKS-I-26_contig_NMXN01000012                                                                                           |                                     |          |            |            |                  |
| Gene name                                                                                                                                   | Species of blast hit                | E value  | % Coverage | % identity | Accession number |
| hypothetical protein F5B20DRAFT_586947                                                                                                      | Whalleya microplaca                 | 0.00E+00 | 99%        | 52.38%     | KAI1073750.1     |
| hypothetical protein DL768_003915                                                                                                           | Monosporascus sp. mg162             | 0        | 99%        | 51.54%     | RYP50633.1       |
| Ketol-acid reductoisomerase                                                                                                                 | <i>Verticillium dahliae</i> VDG2    | 0.00E+00 | 86%        | 68.15%     | KAF3349326.1     |
| RecName: Full=Highly reducing polyketide synthase apmlA; Short=HRPKS apmlA; AltName: Full=Phaeospelide A biosynthesis cluster protein apmlA | <i>Apiospora sphaerosperma</i>      | 0        | 99%        | 50.43%     | P0CU84.1         |
| hypothetical protein BN1708_007417                                                                                                          | <i>Verticillium longisporum</i>     | 0.00E+00 | 87%        | 57.83%     | CRK37551.1       |
| hypothetical protein BN1708_001184                                                                                                          | <i>Verticillium longisporum</i>     | 0        | 85%        | 57.57%     | CRK33507.1       |
| D-amino-acid oxidase                                                                                                                        | <i>Verticillium dahliae</i> VDG1    | 0.00E+00 | 81%        | 70.15%     | KAF3356735.1     |
| reducing type I polyketide synthase                                                                                                         | <i>Xylariomycetidae</i> sp. FL2044  | 0        | 99%        | 43.07%     | KAH9902283.1     |
| hypothetical protein ACN42_g5244                                                                                                            | <i>Penicillium freii</i>            | 0        | 98%        | 43.13%     | KUM61888.1       |
| reducing type I polyketide synthase                                                                                                         | <i>Annulohypoxylon maeteangense</i> | 0        | 98%        | 42.91%     | KAI0883761.1     |

|                                                   |  |  |  |  |  |
|---------------------------------------------------|--|--|--|--|--|
| <i>V. isaacii</i> _VRPKS-I-19_contig_NMXN01000007 |  |  |  |  |  |
|---------------------------------------------------|--|--|--|--|--|

| Gene name                                      | Species of blast hit                | E value | % Coverage | % identity | Accession number |
|------------------------------------------------|-------------------------------------|---------|------------|------------|------------------|
| hypothetical protein J1614_005792              | <i>Leptosphaeria biglobosa</i>      | 0       | 99%        | 77.43%     | KAH9873394.1     |
| Type I Polyketide synthase                     | <i>Verticillium nonalfalfae</i>     | 0       | 100%       | 76.45%     | XP_028494609.1   |
| Reducing polyketide synthase PKS2 like protein | <i>Verticillium longisporum</i>     | 0       | 100%       | 76.49%     | KAG7143635.1     |
| hypothetical protein VD0004_g7884              | <i>Verticillium dahliae</i>         | 0       | 100%       | 76.35%     | PNH38983.1       |
| fatty acid synthase S-acetyltransferase        | <i>Verticillium dahliae</i>         | 0       | 100%       | 76.45%     | KAH6703869.1     |
| fatty acid synthase S-acetyltransferase        | <i>Verticillium dahliae</i> VdLs.17 | 0       | 100%       | 75.80%     | XP_009655626.1   |
| hypothetical protein BN1708_003179             | <i>Verticillium longisporum</i>     | 0       | 100%       | 76.01%     | CRK18834.1       |
| Inositol 2-dehydrogenase 2                     | <i>Verticillium dahliae</i> VDG2    | 0       | 96%        | 76.17%     | KAF3346614.1     |
| hypothetical protein BN1708_009954             | <i>Verticillium longisporum</i>     | 0       | 88%        | 75.80%     | CRK10893.1       |
| hypothetical protein VDGD_03466                | <i>Verticillium dahliae</i>         | 0       | 87%        | 75.97%     | RBQ87991.1       |

| <i>V. isaacii</i> _VRPKS-I-18_contig_NMXN01000010 |                                  |         |            |            |                  |
|---------------------------------------------------|----------------------------------|---------|------------|------------|------------------|
| Gene name                                         | Species of blast hit             | E value | % Coverage | % identity | Accession number |
| Reducing polyketide synthase PKS2                 | <i>Fulvia fulva</i>              | 0       | 99%        | 75.10%     | UJO18003.1       |
| Polyketide synthase                               | <i>Tolypocladium paradoxum</i>   | 0       | 99%        | 67.33%     | POR36838.1       |
| Polyketide synthase                               | <i>Tolypocladium capitatum</i>   | 0       | 99%        | 66.42%     | PNY26863.1       |
| polyketide synthase                               | <i>Thelonectria olida</i>        | 0       | 99%        | 64.31%     | KAH6887502.1     |
| hypothetical protein FDECE_8493                   | <i>Fusarium decemcellulare</i>   | 0       | 99%        | 63.44%     | KAF5005076.1     |
| fatty acid synthase S-acetyltransferase           | <i>Trichoderma harzianum</i>     | 0       | 99%        | 63.98%     | KKO98752.1       |
| Lovastatin diketide synthase mokB                 | <i>Trichoderma lentiforme</i>    | 0       | 99%        | 63.76%     | KAF3065508.1     |
| hypothetical protein THARTR1_06994                | <i>Trichoderma harzianum</i>     | 0       | 99%        | 63.43%     | PNP52390.1       |
| hypothetical protein TgHK011_004790               | <i>Trichoderma gracile</i>       | 0       | 99%        | 62.72%     | KAH0497490.1     |
| Type I Iterative PKS                              | <i>Trichoderma virens</i> FT-333 | 0       | 99%        | 62.69%     | UKZ74406.1       |

| <i>V. isaacii</i> _VRPKS-I-17_contig_NMXN01000005 |                                    |          |            |            |                  |
|---------------------------------------------------|------------------------------------|----------|------------|------------|------------------|
| Gene name                                         | Species of blast hit               | E value  | % Coverage | % identity | Accession number |
| Reducing polyketide synthase PKS2 like protein    | <i>Plectosphaerella cucumerina</i> | 9.00E-46 | 83%        | 75.53%     | KAH7363092.1     |
| Reducing polyketide synthase PKS2 like protein    | <i>Sodiomyces alkalinus</i> F11    | 3.00E-45 | 79%        | 78.89%     | XP_028466984.1   |
| Reducing polyketide synthase PKS2 like protein    | <i>Plectosphaerella plurivora</i>  | 9.00E-45 | 83%        | 75.53%     | KAH6686280.1     |
| Reducing polyketide synthase PKS2 like protein    | <i>Colletotrichum truncatum</i>    | 2.00E-38 | 77%        | 70.65%     | XP_036582859.1   |
| Reducing polyketide synthase PKS2 like protein    | <i>Colletotrichum fructicola</i>   | 3.00E-37 | 80%        | 66.32%     | XP_031886881.1   |

|                                                |                                                   |          |     |        |                |
|------------------------------------------------|---------------------------------------------------|----------|-----|--------|----------------|
| Reducing polyketide synthase PKS2 like protein | <i>Colletotrichum karsti</i>                      | 8.00E-37 | 76% | 71.11% | XP_038750642.1 |
| Reducing polyketide synthase PKS2 like protein | <i>Fusarium oxysporum f. sp. lycopersici</i> 4287 | 5.00E-36 | 82% | 62.89% | XP_018234365.1 |
| Reducing polyketide synthase PKS2 like protein | <i>Fusarium subglutinans</i>                      | 8.00E-36 | 82% | 62.89% | XP_036539494.1 |
| Reducing polyketide synthase PKS2 like protein | <i>Colletotrichum tofieldiae</i>                  | 2.00E-35 | 82% | 66.34% | KZL71328.1     |
| Reducing polyketide synthase PKS2 like protein | <i>Colletotrichum graminicola M1.001</i>          | 2.00E-35 | 82% | 66.34% | XP_008091934.1 |

|                                                  |                                              |          |            |            |                  |
|--------------------------------------------------|----------------------------------------------|----------|------------|------------|------------------|
| V._isaacii_PKS-I-F2_contig_NMXN01000005          |                                              |          |            |            |                  |
| Gene name                                        | Species of blast hit                         | E value  | % Coverage | % identity | Accession number |
| Lovastatin diketide synthase LovF 16             | <i>Colletotrichum chlorophyti</i>            | 0.00E+00 | 99%        | 71.71%     | OLN86478.1       |
| polyketide synthase                              | <i>Colletotrichum truncatum</i>              | 0.00E+00 | 99%        | 71.24%     | XP_036585096.1   |
| Reducing polyketide synthase PKS2                | <i>Colletotrichum trifolii</i>               | 0        | 99%        | 71.28%     | TDZ28230.1       |
| fatty acid synthase S-acetyltransferase          | <i>Verticillium alfalfae VaMs.102</i>        | 0        | 99%        | 82.69%     | XP_003008481.1   |
| Reducing polyketide synthase PKS2                | <i>Colletotrichum orbiculare MAFF 240422</i> | 0        | 99%        | 71.24%     | TDZ25780.1       |
| Reducing polyketide synthase PKS2                | <i>Colletotrichum sidae</i>                  | 0.00E+00 | 99%        | 71.19%     | TEA18683.1       |
| Reducing polyketide synthase PKS2                | <i>Colletotrichum spinosum</i>               | 0        | 99%        | 71.15%     | TDZ31026.1       |
| polyketide synthase                              | <i>Colletotrichum sojae</i>                  | 0        | 99%        | 71.09%     | KAF6806435.1     |
| polyketide synthase                              | <i>Colletotrichum musicola</i>               | 0        | 99%        | 71.30%     | KAF6830768.1     |
| beta-ketoacyl synthase domain-containing protein | <i>Colletotrichum orchidophilum</i>          | 0        | 99%        | 71.24%     | XP_022471279.    |

|                                           |                                  |          |            |            |                  |
|-------------------------------------------|----------------------------------|----------|------------|------------|------------------|
| V._isaacii_VRPKS-I-13_contig_NMXN01000010 |                                  |          |            |            |                  |
| Gene name                                 | Species of blast hit             | E value  | % Coverage | % identity | Accession number |
| polyketide synthase                       | <i>Fusarium avenaceum</i>        | 0        | 99%        | 53.42%     | KIL85244.1       |
| hypothetical protein BKA59DRAFT_387557    | <i>Fusarium tricinctum</i>       | 0        | 99%        | 52.99%     | KAH7261591.1     |
| hypothetical protein DER45DRAFT_513901    | <i>Fusarium avenaceum</i>        | 0.00E+00 | 99%        | 53.14%     | KAH6968136.1     |
| polyketide synthase                       | <i>Fusarium beomiforme</i>       | 0.00E+00 | 99%        | 52.70%     | KAF4341752.1     |
| putative polyketide synthase              | <i>Fusarium aywerte</i>          | 0        | 99%        | 52.88%     | ALQ32765.1       |
| polyketide synthase                       | <i>Fusarium sporotrichioides</i> | 0        | 99%        | 52.75%     | RGP68838.1       |
| unnamed protein product                   | <i>Fusarium graminearum</i>      | 0.00E+00 | 99%        | 52.56%     | VTO93732.1       |
| unnamed protein product                   | <i>Fusarium graminearum</i>      | 0        | 99%        | 52.46%     | CAG2011682.1     |
| unnamed protein product                   | <i>Fusarium graminearum</i>      | 0.00E+00 | 99%        | 52.49%     | CZS84488.1       |
| unnamed protein product                   | <i>Fusarium graminearum</i>      | 0.00E+00 | 99%        | 52.56%     | CAF3490384.1     |



| <i>V. isaacii</i> _VRPKS-I-20_contig_NMXN01000006 |                                           |          |            |            |                  |
|---------------------------------------------------|-------------------------------------------|----------|------------|------------|------------------|
| Gene name                                         | Species of blast hit                      | E value  | % Coverage | % identity | Accession number |
| polyketide synthase                               | <i>Ophiocordyceps camponoti-floridani</i> | 0        | 70%        | 47.07%     | KAF4594413.1     |
| hypothetical protein PENARI_c014G02915            | <i>Penicillium arizonense</i>             | 0        | 69%        | 65.85%     | XP_022486633.1   |
| Bifunctional cytochrome reductase like protein    | <i>Verticillium longisporum</i>           | 0.00E+00 | 30%        | 92.67%     | KAG7141503.1     |
| hypothetical protein BN1708_000330                | <i>Verticillium longisporum</i>           | 0        | 30%        | 92.67%     | CRJ80656.1       |
| bifunctional P-450:NADPH-P450 reductase           | <i>Verticillium alfalfae</i> VaMs.102     | 0.00E+00 | 30%        | 91.08%     | XP_003004414.1   |
| uncharacterized protein D7B24_002818              | <i>Verticillium nonalfalfae</i>           | 0        | 30%        | 91.08%     | XP_028490996.1   |
| Bifunctional cytochrome reductase like protein    | <i>Verticillium longisporum</i>           | 0        | 30%        | 91.80%     | KAG7140967.1     |
| bifunctional P-450:NADPH-P450 reductase           | <i>Verticillium dahliae</i> VdLs.17       | 0        | 30%        | 91.71%     | XP_009654377.1   |
| Bifunctional cytochrome reductase like protein    | <i>Verticillium longisporum</i>           | 0        | 30%        | 92.00%     | KAG7108725.1     |
| hypothetical protein VDGE_07177                   | <i>Verticillium dahliae</i>               | 0        | 30%        | 91.71%     | RXG50553.1       |

| <i>V. isaacii</i> _PKS-III_contig_NMXN01000012                    |                                          |          |            |            |                  |
|-------------------------------------------------------------------|------------------------------------------|----------|------------|------------|------------------|
| Gene name                                                         | Species of blast hit                     | E value  | % Coverage | % identity | Accession number |
| putative chalcone and stilbene synthase domain-containing protein | <i>Colletotrichum sublineola</i>         | 0        | 100%       | 75.73%     | KDN65911.1       |
| chalcone and stilbene synthase domain-containing protein          | <i>Colletotrichum tofieldiae</i>         | 0        | 100%       | 76.13%     | GKT65818.1       |
| chalcone and stilbene synthase domain-containing protein          | <i>Plectosphaerella cucumerina</i>       | 0.00E+00 | 100%       | 77.35%     | KAH7375301.1     |
| chalcone synthase                                                 | <i>Colletotrichum spaethianum</i>        | 0        | 100%       | 75.90%     | GJC81220.1       |
| chalcone and stilbene synthase domain-containing protein          | <i>Colletotrichum tofieldiae</i>         | 0.00E+00 | 100%       | 75.90%     | KZL74511.1       |
| chalcone and stilbene synthase domain-containing protein          | <i>Colletotrichum incanum</i>            | 0        | 100%       | 75.90%     | KZL80557.1       |
| chalcone and stilbene synthase domain-containing protein          | <i>Colletotrichum truncatum</i>          | 0        | 100%       | 75.73%     | XP_036586176.1   |
| chalcone synthase                                                 | <i>Colletotrichum liriopes</i>           | 0.00E+00 | 100%       | 75.45%     | GKT49639.1       |
| chalcone and stilbene synthase domain-containing protein          | <i>Colletotrichum graminicola</i> M1.001 | 0        | 100%       | 75.28%     | XP_008099452.1   |
| putative chalcone and stilbene synthase domain-containing protein | <i>Colletotrichum incanum</i>            | 0        | 100%       | 75.68%     | OHW96035.1       |

|                                                   |  |  |  |  |  |
|---------------------------------------------------|--|--|--|--|--|
| <i>V. isaacii</i> _VRPKS-I-14_contig_NMXN01000003 |  |  |  |  |  |
|---------------------------------------------------|--|--|--|--|--|

| Gene name                                    | Species of blast hit                         | E value  | % Coverage | % identity | Accession number |
|----------------------------------------------|----------------------------------------------|----------|------------|------------|------------------|
| hypothetical protein TruAng_007522           | <i>Truncatella angustata</i>                 | 0        | 100%       | 56.21%     | KAH8198320.1     |
| putative polyketide synthase                 | <i>Truncatella angustata</i>                 | 0        | 99%        | 56.75%     | XP_045957259.1   |
| hypothetical protein AJ80_00462              | <i>Polytolypa hystrixis</i> UAMH7299         | 0        | 100%       | 54.41%     | PGH27912.1       |
| Nonribosomal peptide synthetase-like protein | <i>Acremonium chrysogenum</i> ATCC 11550     | 0        | 99%        | 53.29%     | KFH40504.1       |
| hypothetical protein PDE_03926               | <i>Penicillium oxalicum</i> 114-2            | 0        | 100%       | 46.86%     | EPS28980.1       |
| hypothetical protein EYB26_003290            | <i>Talaromyces marneffei</i>                 | 0.00E+00 | 99%        | 44.93%     | QGA15630.1       |
| hypothetical protein EYB25_008228            | <i>Talaromyces marneffei</i>                 | 0        | 99%        | 44.90%     | KAE8549704.1     |
| polyketide synthase, putative                | <i>Talaromyces marneffei</i> ATCC 18224      | 0        | 99%        | 44.90%     | XP_002151741.1   |
| Highly reducing polyketide synthase AFT9-1   | <i>Colletotrichum orbiculare</i> MAFF 240422 | 0        | 99%        | 44.65%     | TDZ19628.1       |
| Highly reducing polyketide synthase AFT9-1   | <i>Colletotrichum siamense</i>               | 0.00E+00 | 99%        | 44.51%     | KAF4876708.1     |

| <i>V. isaacii</i> _VRPKS-I-25_contig_NMXN01000002 |                                             |          |            |            |                  |
|---------------------------------------------------|---------------------------------------------|----------|------------|------------|------------------|
| Gene name                                         | Species of blast hit                        | E value  | % Coverage | % identity | Accession number |
| hypothetical protein S40293_03578                 | <i>Stachybotrys chartarum</i> IBT 40293     | 0        | 99%        | 89.64%     | KFA46917.1       |
| hypothetical protein S40288_08039                 | <i>Stachybotrys chartarum</i> IBT 40288     | 0        | 99%        | 87.69%     | KFA72420.1       |
| hypothetical protein S7711_03851                  | <i>Stachybotrys chartarum</i> IBT 7711      | 0.00E+00 | 86%        | 89.19%     | KEY68922.1       |
| hypothetical protein DL764_002272                 | <i>Monosporascus ibericus</i>               | 0.00E+00 | 99%        | 56.76%     | RYP07817.1       |
| hypothetical protein DL770_006186                 | <i>Monosporascus</i> sp. CRB-9-2            | 0        | 99%        | 57.05%     | RYP80513.1       |
| hypothetical protein B7494_g6164                  | <i>Chlorociboria aeruginascens</i>          | 0.00E+00 | 99%        | 56.54%     | TAQ85507.1       |
| type I iterative PKS                              | <i>Aspergillus luchuensis</i>               | 0.00E+00 | 99%        | 55.80%     | XP_041547082.1   |
| polyketide synthase                               | <i>Aspergillus costaricensis</i> CBS 115574 | 0.00E+00 | 99%        | 55.58%     | XP_025542753.1   |
| polyketide synthase                               | <i>Aspergillus niger</i>                    | 0        | 99%        | 55.38%     | GAQ46573.1       |
| polyketide synthase                               | <i>Aspergillus neoniger</i> CBS 115656      | 0        | 99%        | 55.58%     | XP_025484624.1   |

| <i>V. isaacii</i> _VRPKS-I-2_contig_NMXN01000008 |                                  |          |            |            |                  |
|--------------------------------------------------|----------------------------------|----------|------------|------------|------------------|
| Gene name                                        | Species of blast hit             | E value  | % Coverage | % identity | Accession number |
| Fusaridione A synthetase fsdS                    | <i>Colletotrichum fructicola</i> | 0        | 100%       | 85.82%     | KAF4886526.1     |
| Fusaridione A synthetase                         | <i>Colletotrichum fructicola</i> | 0.00E+00 | 100%       | 85.79%     | XP_031875985.1   |
| hypothetical protein ANO14919_082590             | <i>fungus</i> sp. No.14919       | 0.00E+00 | 99%        | 56.00%     | GAW18777.1       |
| putative polyketide synthase                     | <i>Xylaria grammica</i>          | 0        | 99%        | 55.52%     | KAI0412784.1     |
| hypothetical protein EKO27_g3160                 | <i>Xylaria grammica</i>          | 0        | 99%        | 55.48%     | RWA11947.1       |

|                                   |                                 |          |     |        |                |
|-----------------------------------|---------------------------------|----------|-----|--------|----------------|
| hypothetical protein UA08_04451   | <i>Talaromyces atrovireus</i>   | 0        | 99% | 53.75% | XP_020120442.1 |
| ChaA                              | <i>Chaetomium olivaceum</i>     | 0        | 99% | 52.99% | QJX57338.1     |
| hypothetical protein LOZ25_002353 | <i>Ophidiomyces ophidiicola</i> | 0        | 99% | 48.62% | KAI2161307.1   |
| hypothetical protein LOZ59_004326 | <i>Ophidiomyces ophidiicola</i> | 0.00E+00 | 99% | 48.62% | KAI1956291.1   |
| hypothetical protein LOZ61_000210 | <i>Ophidiomyces ophidiicola</i> | 0        | 99% | 48.60% | KAI1918094.1   |

|                                                   |                                       |          |            |            |                  |
|---------------------------------------------------|---------------------------------------|----------|------------|------------|------------------|
| <i>V. isaacii</i> _VRPKS-I-12_contig_NMXN01000005 |                                       |          |            |            |                  |
| Gene name                                         | Species of blast hit                  | E value  | % Coverage | % identity | Accession number |
| polyketide synthase                               | <i>Sodiomyces alkalinus F11</i>       | 0.00E+00 | 97%        | 75.30%     | XP_028469272.1   |
| beta-ketoacyl synthase domain-containing protein  | <i>Colletotrichum salicis</i>         | 0        | 97%        | 72.61%     | KXH33485.1       |
| beta-ketoacyl synthase domain-containing protein  | <i>Colletotrichum fioriniae PJ7</i>   | 0        | 97%        | 72.57%     | EXF80071.1       |
| beta-ketoacyl synthase domain-containing protein  | <i>Colletotrichum scovillei</i>       | 0        | 97%        | 72.44%     | XP_035338903.1   |
| beta-ketoacyl synthase domain-containing protein  | <i>Colletotrichum nymphaeae SA-01</i> | 0        | 97%        | 72.48%     | KXH30697.1       |
| beta-ketoacyl synthase domain-containing protein  | <i>Colletotrichum simmondsii</i>      | 0        | 97%        | 72.39%     | KXH41720.1       |
| beta-ketoacyl synthase domain-containing protein  | <i>Colletotrichum orchidophilum</i>   | 0        | 97%        | 72.34%     | XP_022470047.1   |
| hypothetical protein G7Z17_g6123                  | <i>Cylindrodendrum hubeiense</i>      | 0        | 97%        | 65.73%     | KAF7549858.1     |
| polyketide synthase                               | <i>Pochonia chlamydosporia 170</i>    | 0        | 97%        | 65.84%     | XP_018147207.1   |
| polyketide synthase                               | <i>Thelonectria olida</i>             | 0        | 97%        | 66.00%     | KAH6899708.1     |

|                                                          |                                             |   |      |        |                |
|----------------------------------------------------------|---------------------------------------------|---|------|--------|----------------|
| <i>V. isaacii</i> _VNRPKS-I-1_contig_NMXN01000005        |                                             |   |      |        |                |
| hypothetical protein CGLO_05047                          | <i>Colletotrichum gloeosporioides Cg-14</i> | 0 | 100% | 78.78% | EQB55056.1     |
| hypothetical protein GQ607_010262                        | <i>Colletotrichum asianum</i>               | 0 | 100% | 78.69% | KAF0322599.1   |
| hypothetical protein K456DRAFT_1724748                   | <i>Colletotrichum gloeosporioides 23</i>    | 0 | 100% | 78.73% | KAH9233890.1   |
| Conidial yellow pigment biosynthesis polyketide synthase | <i>Colletotrichum fruticola</i>             | 0 | 100% | 78.73% | KAF4937522.1   |
| Conidial yellow pigment biosynthesis polyketide synthase | <i>Colletotrichum viniferum</i>             | 0 | 100% | 78.69% | KAF4919737.1   |
| Conidial yellow pigment biosynthesis polyketide synthase | <i>Colletotrichum gloeosporioides</i>       | 0 | 100% | 78.73% | XP_045268234.1 |
| Conidial yellow pigment biosynthesis polyketide synthase | <i>Colletotrichum siamense</i>              | 0 | 100% | 78.69% | KAF4840476.1   |
| Conidial yellow pigment biosynthesis polyketide synthase | <i>Colletotrichum fruticola</i>             | 0 | 100% | 78.69% | XP_031880204.1 |
| hypothetical protein CcaCcLH18_10320                     | <i>Colletotrichum camelliae</i>             | 0 | 100% | 78.78% | KAH0426510.1   |
| uncharacterized protein CkaCkLH20_00019                  | <i>Colletotrichum karsti</i>                | 0 | 100% | 78.82% | XP_038751444.1 |

| <i>V. isaacii</i> _VRPKS-I-6_contig_NMXN01000008 |                                           |         |            |            |                  |
|--------------------------------------------------|-------------------------------------------|---------|------------|------------|------------------|
| Gene name                                        | Species of blast hit                      | E value | % Coverage | % identity | Accession number |
| putative hybrid pks-nrps                         | <i>Xylariomycetidae</i> sp. <i>FL2044</i> | 0       | 99%        | 57.65%     | KAH9905503.1     |
| putative hybrid pks-nrps                         | <i>Aspergillus burnettii</i>              | 0       | 98%        | 68.18%     | KAF5861957.1     |
| putative hybrid pks-nrps                         | <i>Aspergillus avenaceus</i>              | 0       | 98%        | 68.51%     | KAE8150730.1     |
| putative hybrid pks-nrps                         | <i>Aspergillus alliaceus</i>              | 0       | 98%        | 67.99%     | KAE8392342.1     |
| putative hybrid pks-nrps                         | <i>Aspergillus alliaceus</i>              | 0       | 98%        | 67.88%     | XP_031905223.1   |
| putative hybrid pks-nrps                         | <i>Xylariaceae</i> sp. <i>FL0016</i>      | 0       | 98%        | 66.98%     | KAI1344561.1     |
| putative hybrid pks-nrps                         | <i>Didymosphaeria enalia</i>              | 0       | 90%        | 66.27%     | KAF2268091.1     |
| putative hybrid pks-nrps                         | <i>Clohesyomyces aquaticus</i>            | 0       | 90%        | 65.87%     | ORY13581.1       |
| putative hybrid pks-nrps                         | <i>Biscogniauxia</i> sp. <i>FL1348</i>    | 0       | 97%        | 66.25%     | KAI0596210.1     |
| putative hybrid pks-nrps                         | <i>Biscogniauxia marginata</i>            | 0       | 97%        | 66.43%     | KAI1495559.1     |

| <i>V. isaacii</i> _VRPKS-I-5_contig_NMXN01000006 |                                                         |         |            |            |                  |
|--------------------------------------------------|---------------------------------------------------------|---------|------------|------------|------------------|
| Gene name                                        | Species of blast hit                                    | E value | % Coverage | % identity | Accession number |
| hypothetical protein F4775DRAFT_593279           | <i>Biscogniauxia</i> sp. <i>FL1348</i>                  | 0       | 99%        | 65.20%     | KAI0597589.1     |
| hypothetical protein F5X96DRAFT_674085           | <i>Biscogniauxia mediterranea</i>                       | 0       | 99%        | 64.90%     | KAI1485991.1     |
| hypothetical protein F4809DRAFT_640890           | <i>Biscogniauxia mediterranea</i>                       | 0       | 99%        | 65.07%     | KAI1637132.1     |
| lovastatin nonaketide synthase protein           | <i>Rutstroemia</i> sp. <i>NJR-2017a BBW</i>             | 0       | 100%       | 43.99%     | PQE06091.1       |
| amino acid adenylation domain-containing protein | <i>Hymenoscyphus varicosporioides</i>                   | 0       | 99%        | 41.55%     | KAH8646967.1     |
| hypothetical protein V502_02428                  | <i>Pseudogymnoascus</i> sp. <i>VKM F-4520 (FW-2644)</i> | 0       | 99%        | 41.76%     | KFZ23096.1       |
| hypothetical protein V501_03696                  | <i>Pseudogymnoascus</i> sp. <i>VKM F-4519 (FW-2642)</i> | 0       | 99%        | 41.60%     | KFZ13457.1       |
| uncharacterized protein BP5553_05145             | <i>Venustampulla echinocandica</i>                      | 0       | 99%        | 40.02%     | XP_031870368.1   |
| Fusaridione A synthetase fsdS                    | <i>Colletotrichum fruticola</i>                         | 0       | 99%        | 40.28%     | KAF4886526.1     |
| Fusaridione A synthetase                         | <i>Colletotrichum fruticola</i>                         | 0       | 99%        | 40.26%     | XP_031875985.1   |

| <i>V. isaacii</i> _VRPKS-I-9_contig_NMXN01000009 |                                              |         |            |            |                  |
|--------------------------------------------------|----------------------------------------------|---------|------------|------------|------------------|
| Gene name                                        | Species of blast hit                         | E value | % Coverage | % identity | Accession number |
| AMP-binding enzyme domain-containing protein     | <i>Hirsutella rhossiliensis</i>              | 0       | 99%        | 72.13%     | XP_044717051.1   |
| lovastatin nonaketide synthase                   | <i>Verticillium alfalfae</i> <i>VaMs.102</i> | 0       | 100%       | 69.79%     | XP_003005392.1   |

|                                   |                                            |   |      |        |                |
|-----------------------------------|--------------------------------------------|---|------|--------|----------------|
| hypothetical protein HIM_06709    | <i>Hirsutella minnesotensis</i> 3608       | 0 | 99%  | 65.59% | KJZ73816.1     |
| lovastatin nonaketide synthase    | <i>Dactylonectria macrodidyma</i>          | 0 | 99%  | 57.88% | KAH7176829.1   |
| lovastatin nonaketide synthase    | <i>Aspergillus novofumigatus</i> IBT 16806 | 0 | 100% | 54.52% | XP_024677790.1 |
| lovastatin nonaketide synthase    | <i>Hypoxylon trugodes</i>                  | 0 | 99%  | 52.48% | KAI1387791.1   |
| hypothetical protein DL768_008516 | <i>Monosporascus sp.</i> mg162             | 0 | 99%  | 51.27% | RYP45085.1     |
| hypothetical protein JX265_007707 | <i>Wardomyces moseri</i>                   | 0 | 99%  | 50.61% | KAI1866406.1   |
| hypothetical protein JN550_003285 | <i>Wardomyces moseri</i>                   | 0 | 99%  | 50.51% | KAI1873032.1   |

| <i>V. klebahnii</i> _VRPKS-I-16_contig_NMXL01000003                   |                                      |          |            |            |                  |
|-----------------------------------------------------------------------|--------------------------------------|----------|------------|------------|------------------|
| Gene name                                                             | Species of blast hit                 | E value  | % Coverage | % identity | Accession number |
| putative polyketide synthase [Plectosphaerella cucumerina]            | <i>Plectosphaerella cucumerina</i>   | 0.00E+00 | 99%        | 72.37%     | KAH7369281.1     |
| putative polyketide synthase [Plectosphaerella plurivora]             | <i>Plectosphaerella plurivora</i>    | 0        | 99%        | 71.57%     | KAH6673997.1     |
| hypothetical protein K402DRAFT_461387 [Aulographum hederæ CBS 113979] | <i>Aulographum hederæ</i> CBS 113979 | 0.00E+00 | 99%        | 49.98%     | KAF1988946.1     |
| hypothetical protein L207DRAFT_422368 [Hyaloscypha variabilis F]      | <i>Hyaloscypha variabilis</i> F      | 0        | 99%        | 48.54%     | PMD43053.1       |
| hypothetical protein DL98DRAFT_477463 [Cadophora sp. DSE1049]         | <i>Cadophora sp.</i> DSE1049         | 0        | 99%        | 48.17%     | PVH88801.1       |
| uncharacterized protein K444DRAFT_592521 [Hyaloscypha bicolor E]      | <i>Hyaloscypha bicolor</i> E         | 0.00E+00 | 99%        | 48.10%     | XP_024734639.1   |
| hypothetical protein IFR05_000103 [Cadophora sp. M221]                | <i>Cadophora sp.</i> M221            | 0.00E+00 | 99%        | 47.56%     | KAG4444512.1     |
| putative polyketide synthase [Tothia fuscella]                        | <i>Tothia fuscella</i>               | 0.00E+00 | 99%        | 47.56%     | KAF2419578.1     |
| hypothetical protein NA56DRAFT_673334 [Hyaloscypha hepaticicola]      | <i>Hyaloscypha hepaticicola</i>      | 0.00E+00 | 99%        | 45.95%     | PMD16306.1       |
| hypothetical protein CNMCM7691_001823 [Aspergillus felis]             | <i>Aspergillus felis</i>             | 0        | 99%        | 46.49%     | KAF7182343.1     |

| <i>V. klebahnii</i> _VRPKS-I-17_contig_NMXL01000003                       |                                              |         |            |            |                  |
|---------------------------------------------------------------------------|----------------------------------------------|---------|------------|------------|------------------|
| Gene name                                                                 | Species of blast hit                         | E value | % Coverage | % identity | Accession number |
| Lovastatin diketide synthase LovF 16 [Colletotrichum chlorophyti]         | <i>Colletotrichum chlorophyti</i>            | 0       | 99%        | 71.80%     | OLN86478.1       |
| Reducing polyketide synthase PKS2 [Colletotrichum trifolii]               | <i>Colletotrichum trifolii</i>               | 0       | 99%        | 71.45%     | TDZ28230.1       |
| polyketide synthase [Colletotrichum truncatum]                            | <i>Colletotrichum truncatum</i>              | 0       | 99%        | 71.24%     | XP_036585096.1   |
| Reducing polyketide synthase PKS2 [Colletotrichum orbiculare MAFF 240422] | <i>Colletotrichum orbiculare</i> MAFF 240422 | 0       | 99%        | 71.41%     | TDZ25780.1       |
| Reducing polyketide synthase PKS2 [Colletotrichum sidae]                  | <i>Colletotrichum sidae</i>                  | 0       | 99%        | 71.37%     | TEA18683.1       |
| Reducing polyketide synthase PKS2 [Colletotrichum spinosum]               | <i>Colletotrichum spinosum</i>               | 0       | 99%        | 71.32%     | TDZ31026.1       |
| polyketide synthase [Colletotrichum sojae]                                | <i>Colletotrichum sojae</i>                  | 0       | 99%        | 71.31%     | KAF6806435.1     |

|                                                                                 |                                       |   |     |        |                |
|---------------------------------------------------------------------------------|---------------------------------------|---|-----|--------|----------------|
| fatty acid synthase S-acetyltransferase [Verticillium alfalfae VaMs.102]        | <i>Verticillium alfalfae VaMs.102</i> | 0 | 99% | 82.59% | XP_003008481.1 |
| polyketide synthase [Colletotrichum musicola]                                   | <i>Colletotrichum musicola</i>        | 0 | 99% | 71.52% | KAF6830768.1   |
| beta-ketoacyl synthase domain-containing protein [Colletotrichum orchidophilum] | <i>Colletotrichum orchidophilum</i>   | 0 | 99% | 71.29% | XP_022471279.1 |

|                                                                                                    |                                       |         |            |            |                  |
|----------------------------------------------------------------------------------------------------|---------------------------------------|---------|------------|------------|------------------|
| <i>V. klebahnii</i> _VRPKS-I-23_contig_NMXL01000003                                                |                                       |         |            |            |                  |
| Gene name                                                                                          | Species of blast hit                  | E value | % Coverage | % identity | Accession number |
| phenolphthiocerol synthesis polyketide synthase ppsA [Sodiomyces alkalinus F11]                    | <i>Sodiomyces alkalinus F11</i>       | 0       | 99%        | 51.87%     | XP_028462492.1   |
| polyketide synthase [Verticillium nonalfalfae]                                                     | <i>Verticillium nonalfalfae</i>       | 0       | 96%        | 65.04%     | XP_028490525.1   |
| phenolphthiocerol synthesis polyketide synthase ppsA [Plectosphaerella plurivora]                  | <i>Plectosphaerella plurivora</i>     | 0       | 99%        | 46.01%     | KAH6697431.1     |
| phenolphthiocerol synthesis polyketide synthase ppsA [Plectosphaerella cucumerina]                 | <i>Plectosphaerella cucumerina</i>    | 0       | 99%        | 45.32%     | KAH7358949.1     |
| beta-ketoacyl synthase domain-containing protein [Colletotrichum incanum]                          | <i>Colletotrichum incanum</i>         | 0       | 99%        | 45.07%     | OHW97630.1       |
| polyketide synthase (beta-ketoacyl synthase domain-containing protein) [Colletotrichum tofieldiae] | <i>Colletotrichum tofieldiae</i>      | 0       | 97%        | 45.47%     | KZL67886.1       |
| Lovastatin diketide synthase LovF 13 [Colletotrichum chlorophyti]                                  | <i>Colletotrichum chlorophyti</i>     | 0       | 98%        | 44.69%     | OLN85715.1       |
| beta-ketoacyl synthase domain-containing protein [Colletotrichum karsti]                           | <i>Colletotrichum karsti</i>          | 0       | 97%        | 44.88%     | XP_038741012.1   |
| beta-ketoacyl synthase domain-containing protein [Colletotrichum incanum]                          | <i>Colletotrichum incanum</i>         | 0       | 97%        | 45.09%     | KZL83622.1       |
| Reducing polyketide synthase FUB1 [Colletotrichum gloeosporioides]                                 | <i>Colletotrichum gloeosporioides</i> | 0       | 97%        | 45.40%     | XP_045256339.1   |

|                                                                           |                                         |         |            |            |                  |
|---------------------------------------------------------------------------|-----------------------------------------|---------|------------|------------|------------------|
| <i>V. klebahnii</i> _VNRPKS-I-2_contig_NMXL01000003                       |                                         |         |            |            |                  |
| Gene name                                                                 | Species of blast hit                    | E value | % Coverage | % identity | Accession number |
| hypothetical protein DL764_006210 [Monosporascus ibericus]                | <i>Monosporascus ibericus</i>           | 0       | 76%        | 80.96%     | RYP01440.1       |
| uncharacterized protein BGZ61DRAFT_593032 [Ilyonectria robusta]           | <i>Ilyonectria robusta</i>              | 0       | 76%        | 76.15%     | XP_046097594.1   |
| hypothetical protein BKA56DRAFT_558919 [Ilyonectria sp. MPI-CAGE-AT-0026] | <i>Ilyonectria sp. MPI-CAGE-AT-0026</i> | 0       | 76%        | 75.78%     | KAH6970569.1     |
| PKS16 protein [Ilyonectria destructans]                                   | <i>Ilyonectria destructans</i>          | 0       | 76%        | 74.92%     | KAH7000898.1     |
| PKS16 protein [Dactylonectria estremocensis]                              | <i>Dactylonectria estremocensis</i>     | 0       | 76%        | 74.96%     | KAH7155810.1     |
| PKS16 protein [Dactylonectria macrodidyma]                                | <i>Dactylonectria macrodidyma</i>       | 0       | 76%        | 74.64%     | KAH7120608.1     |

|                                                         |                                                |   |     |        |                |
|---------------------------------------------------------|------------------------------------------------|---|-----|--------|----------------|
| uncharacterized protein INS49_005730 [Diaporthe citri]  | <i>Diaporthe citri</i>                         | 0 | 76% | 59.21% | XP_043027652.1 |
| PKS16 protein [Corynespora cassicola Philippines]       | <i>Corynespora cassicola Philippines</i>       | 0 | 76% | 58.60% | PSN68069.1     |
| PKS16 protein [Rhexocerosporidium sp. MPI-PUGE-AT-0058] | <i>Rhexocerosporidium sp. MPI-PUGE-AT-0058</i> | 0 | 76% | 53.44% | KAH7357101.1   |
| polyketide synthase [Leptodontidium sp. 2 PMI_412]      | <i>Leptodontidium sp. 2 PMI_412</i>            | 0 | 76% | 53.71% | KAH9225058.1   |

| <i>V. klebahnii</i> _VRPKS-I-25_contig_NMXL01000017                  |                                              |         |            |            |                  |
|----------------------------------------------------------------------|----------------------------------------------|---------|------------|------------|------------------|
| Gene name                                                            | Species of blast hit                         | E value | % Coverage | % identity | Accession number |
| hypothetical protein S40293_03578 [Stachybotrys chartarum IBT 40293] | <i>Stachybotrys chartarum IBT 40293</i>      | 0       | 99%        | 89.34%     | KFA46917.1       |
| hypothetical protein S40288_08039 [Stachybotrys chartarum IBT 40288] | <i>Stachybotrys chartarum IBT 40288</i>      | 0       | 99%        | 87.39%     | KFA72420.1       |
| hypothetical protein S7711_03851 [Stachybotrys chartarum IBT 7711]   | <i>Stachybotrys chartarum IBT 7711</i>       | 0       | 86%        | 88.90%     | KEY68922.1       |
| hypothetical protein DL764_002272 [Monosporascus ibericus]           | <i>Monosporascus ibericus</i>                | 0       | 99%        | 56.76%     | RYP07817.1       |
| hypothetical protein DL770_006186 [Monosporascus sp. CRB-9-2]        | <i>Monosporascus sp. CRB-9-2</i>             | 0       | 99%        | 57.05%     | RYP80513.1       |
| hypothetical protein B7494_g6164 [Chlorociboria aeruginascens]       | <i>Chlorociboria aeruginascens</i>           | 0       | 99%        | 56.23%     | TAQ85507.1       |
| type I iterative PKS [Aspergillus luchuensis]                        | <i>Aspergillus luchuensis</i>                | 0       | 99%        | 55.84%     | XP_041547082.1   |
| polyketide synthase [Aspergillus niger]                              | <i>Aspergillus niger</i>                     | 0       | 99%        | 55.71%     | GAQ46573.1       |
| polyketide synthase [Aspergillus costaricaensis CBS 115574]          | <i>Aspergillus costaricaensis CBS 115574</i> | 0       | 99%        | 55.41%     | XP_025542753.1   |
| polyketide synthase [Aspergillus neoniger CBS 115656]                | <i>Aspergillus neoniger CBS 115656</i>       | 0       | 99%        | 55.50%     | XP_025484624.1   |

| <i>V. klebahnii</i> _VRPKS-I-13_contig_NMXL01000002          |                             |         |            |            |                  |
|--------------------------------------------------------------|-----------------------------|---------|------------|------------|------------------|
| Gene name                                                    | Species of blast hit        | E value | % Coverage | % identity | Accession number |
| polyketide synthase [Fusarium avenaceum]                     | <i>Fusarium avenaceum</i>   | 0       | 99%        | 53.50%     | KIL85244.1       |
| hypothetical protein BKA59DRAFT_387557 [Fusarium tricinctum] | <i>Fusarium tricinctum</i>  | 0       | 99%        | 53.17%     | KAH7261591.1     |
| hypothetical protein DER45DRAFT_513901 [Fusarium avenaceum]  | <i>Fusarium avenaceum</i>   | 0       | 99%        | 53.17%     | KAH6968136.1     |
| polyketide synthase [Fusarium beomiforme]                    | <i>Fusarium beomiforme</i>  | 0       | 99%        | 52.95%     | KAF4341752.1     |
| putative polyketide synthase [Fusarium aywerte]              | <i>Fusarium aywerte</i>     | 0       | 99%        | 52.99%     | ALQ32765.1       |
| unnamed protein product [Fusarium graminearum]               | <i>Fusarium graminearum</i> | 0       | 99%        | 52.81%     | VTO93732.1       |
| unnamed protein product [Fusarium graminearum]               | <i>Fusarium graminearum</i> | 0       | 99%        | 52.72%     | CAF3461387.1     |

|                                                     |                             |   |     |        |              |
|-----------------------------------------------------|-----------------------------|---|-----|--------|--------------|
| unnamed protein product [Fusarium graminearum]      | <i>Fusarium graminearum</i> | 0 | 99% | 52.75% | CZS84488.1   |
| unnamed protein product [Fusarium graminearum]      | <i>Fusarium graminearum</i> | 0 | 99% | 52.72% | CAG2002135.1 |
| hypothetical protein FGRMN_6861 [Fusarium graminum] | <i>Fusarium graminum</i>    | 0 | 99% | 52.74% | KAF4992917.1 |

|                                                                           |                                               |         |            |            |                  |
|---------------------------------------------------------------------------|-----------------------------------------------|---------|------------|------------|------------------|
| <i>V. klebahnii</i> _VRPKS-I-19_contig_NMXL01000006                       |                                               |         |            |            |                  |
| Gene name                                                                 | Species of blast hit                          | E value | % Coverage | % identity | Accession number |
| hypothetical protein J1614_005792 [Leptosphaeria biglobosa]               | <i>Leptosphaeria biglobosa</i>                | 0       | 99%        | 77.25%     | KAH9873394.1     |
| Type I Polyketide synthase [Verticillium nonalfalfae]                     | <i>Verticillium nonalfalfae</i>               | 0       | 100%       | 76.49%     | XP_028494609.1   |
| Reducing polyketide synthase PKS2 like protein [Verticillium longisporum] | <i>Verticillium longisporum</i>               | 0       | 100%       | 76.54%     | KAG7143635.1     |
| hypothetical protein VD0004_g7884 [Verticillium dahliae]                  | <i>Verticillium dahliae</i>                   | 0       | 100%       | 76.40%     | PNH38983.1       |
| fatty acid synthase S-acetyltransferase [Verticillium dahliae]            | <i>Verticillium dahliae</i>                   | 0       | 100%       | 76.49%     | KAH6703869.1     |
| fatty acid synthase S-acetyltransferase [Verticillium dahliae VdLs.17]    | <i>Verticillium dahliae</i><br><i>VdLs.17</i> | 0       | 100%       | 75.85%     | XP_009655626.1   |
| hypothetical protein BN1708_003179 [Verticillium longisporum]             | <i>Verticillium longisporum</i>               | 0       | 100%       | 75.91%     | CRK18834.1       |
| Inositol 2-dehydrogenase 2 [Verticillium dahliae VDG2]                    | <i>Verticillium dahliae</i> VDG2              | 0       | 96%        | 76.07%     | KAF3346614.1     |
| hypothetical protein BN1708_009954 [Verticillium longisporum]             | <i>Verticillium longisporum</i>               | 0       | 88%        | 75.70%     | CRK10893.1       |
| hypothetical protein VDGD_03466 [Verticillium dahliae]                    | <i>Verticillium dahliae</i>                   | 0       | 87%        | 75.87%     | RBQ87991.1       |

|                                                                                 |                                             |         |            |            |                  |
|---------------------------------------------------------------------------------|---------------------------------------------|---------|------------|------------|------------------|
| <i>V. klebahnii</i> _VRPKS-I-20_contig_NMXL01000001                             |                                             |         |            |            |                  |
| Gene name                                                                       | Species of blast hit                        | E value | % Coverage | % identity | Accession number |
| hypothetical protein PENARI_c014G02915 [Penicillium arizonense]                 | <i>Penicillium arizonense</i>               | 0       | 99%        | 67.20%     | XP_022486633.1   |
| hypothetical protein G6O67_006196 [Ophiocordyceps sinensis]                     | <i>Ophiocordyceps sinensis</i>              | 0       | 99%        | 51.01%     | KAF4506076.1     |
| Lovastatin nonaketide synthase-like protein [Acremonium chrysogenum ATCC 11550] | <i>Acremonium chrysogenum</i><br>ATCC 11550 | 0       | 99%        | 50.30%     | KFH43961.1       |
| uncharacterized protein BGW36DRAFT_428643 [Talaromyces proteolyticus]           | <i>Talaromyces proteolyticus</i>            | 0       | 99%        | 50.31%     | XP_046071584.1   |
| type I iterative polyketide synthase [Purpureocillium lilacinum]                | <i>Purpureocillium lilacinum</i>            | 0       | 99%        | 49.54%     | GJN77380.1       |
| putative polyketide synthase protein [Purpureocillium lilacinum]                | <i>Purpureocillium lilacinum</i>            | 0       | 99%        | 49.48%     | PWI74782.1       |
| type I Iterative Polyketide synthase (PKS) [Purpureocillium lilacinum]          | <i>Purpureocillium lilacinum</i>            | 0       | 99%        | 49.42%     | GJN68941.1       |
| uncharacterized protein BDV37DRAFT_285272 [Aspergillus pseudonomiae]            | <i>Aspergillus pseudonomiae</i>             | 0       | 99%        | 49.35%     | XP_031939187.1   |
| hypothetical protein BDV32DRAFT_145394 [Aspergillus pseudonomiae]               | <i>Aspergillus pseudonomiae</i>             | 0       | 99%        | 49.35%     | KAB8264716.1     |
| uncharacterized protein ANOM_000018 [Aspergillus nomiae NRRL 13137]             | <i>Aspergillus nomiae</i> NRRL 13137        | 0       | 99%        | 48.95%     | XP_015412436.1   |



| <i>V. klebahnii</i> _PKS-III_contig_NMXL01000010                                              |                                          |         |            |            |                  |
|-----------------------------------------------------------------------------------------------|------------------------------------------|---------|------------|------------|------------------|
| Gene name                                                                                     | Species of blast hit                     | E value | % Coverage | % identity | Accession number |
| putative chalcone and stilbene synthase domain-containing protein [Colletotrichum sublineola] | <i>Colletotrichum sublineola</i>         | 0       | 100%       | 75.28%     | KDN65911.1       |
| chalcone and stilbene synthase domain-containing protein [Colletotrichum tofieldiae]          | <i>Colletotrichum tofieldiae</i>         | 0       | 100%       | 75.68%     | GKT65818.1       |
| chalcone synthase [Colletotrichum spaethianum]                                                | <i>Colletotrichum spaethianum</i>        | 0       | 100%       | 75.45%     | GJC81220.1       |
| chalcone and stilbene synthase domain-containing protein [Colletotrichum tofieldiae]          | <i>Colletotrichum tofieldiae</i>         | 0       | 100%       | 75.45%     | KZL74511.1       |
| chalcone and stilbene synthase domain-containing protein [Plectosphaerella cucumerina]        | <i>Plectosphaerella cucumerina</i>       | 0       | 100%       | 76.46%     | KAH7375301.1     |
| chalcone and stilbene synthase domain-containing protein [Colletotrichum incanum]             | <i>Colletotrichum incanum</i>            | 0       | 100%       | 75.45%     | KZL80557.1       |
| chalcone and stilbene synthase domain-containing protein [Colletotrichum truncatum]           | <i>Colletotrichum truncatum</i>          | 0       | 100%       | 75.28%     | XP_036586176.1   |
| putative chalcone and stilbene synthase domain-containing protein [Colletotrichum incanum]    | <i>Colletotrichum incanum</i>            | 0       | 100%       | 75.23%     | OHW96035.1       |
| chalcone and stilbene synthase domain-containing protein [Colletotrichum graminicola M1.001]  | <i>Colletotrichum graminicola M1.001</i> | 0       | 100%       | 74.83%     | XP_008099452.1   |
| chalcone synthase [Colletotrichum liriopes]                                                   | <i>Colletotrichum liriopes</i>           | 0       | 100%       | 75.00%     | GKT49639.1       |

| <i>V. klebahnii</i> _VRPKS-I-26_contig_NMXL01000010                                                                                                                   |                                     |         |            |            |                  |
|-----------------------------------------------------------------------------------------------------------------------------------------------------------------------|-------------------------------------|---------|------------|------------|------------------|
| Gene name                                                                                                                                                             | Species of blast hit                | E value | % Coverage | % identity | Accession number |
| hypothetical protein DL768_003915 [Monosporascus sp. mg162]                                                                                                           | <i>Monosporascus sp. mg162</i>      | 0       | 99%        | 50.81%     | RYP50633.1       |
| Ketol-acid reductoisomerase [Verticillium dahliae VDG2]                                                                                                               | <i>Verticillium dahliae VDG2</i>    | 0       | 85%        | 67.54%     | KAF3349326.1     |
| RecName: Full=Highly reducing polyketide synthase apmlA; Short=HRPKS apmlA; AltName: Full=Phaeospelide A biosynthesis cluster protein apmlA [Apiospora sphaerosperma] | <i>Apiospora sphaerosperma</i>      | 0       | 99%        | 49.55%     | P0CU84.1         |
| mycocerosic acid synthase [Verticillium dahliae VdLs.17]                                                                                                              | <i>Verticillium dahliae VdLs.17</i> | 0       | 99%        | 61.74%     | XP_009654470.1   |
| D-amino-acid oxidase [Verticillium dahliae VDG1]                                                                                                                      | <i>Verticillium dahliae VDG1</i>    | 0       | 81%        | 69.50%     | KAF3356735.1     |
| putative polyketide synthase [Xylariales sp. PMI_506]                                                                                                                 | <i>Xylariales sp. PMI_506</i>       | 0       | 98%        | 42.07%     | KAH8657763.1     |
| Fumagillin dodecapentaenoate synthase [Lachnellula willkommii]                                                                                                        | <i>Lachnellula willkommii</i>       | 0       | 99%        | 42.26%     | TVY89575.1       |
| Fumagillin dodecapentaenoate synthase [Lachnellula arida]                                                                                                             | <i>Lachnellula arida</i>            | 0       | 99%        | 42.20%     | TVY19100.1       |
| reducing type I polyketide synthase [Xylariomycetidae sp. FL2044]                                                                                                     | <i>Xylariomycetidae sp. FL2044</i>  | 0       | 99%        | 42.24%     | KAH9902283.1     |
| Fumagillin dodecapentaenoate synthase [Lachnellula cervina]                                                                                                           | <i>Lachnellula cervina</i>          | 0       | 98%        | 42.24%     | TVY51056.1       |

| <i>V. klebahnii</i> _VRPKS-I-14_contig_NMXL01000010                                |                                              |         |            |            |                  |
|------------------------------------------------------------------------------------|----------------------------------------------|---------|------------|------------|------------------|
| Gene name                                                                          | Species of blast hit                         | E value | % Coverage | % identity | Accession number |
| hypothetical protein TruAng_007522 [Truncatella angustata]                         | <i>Truncatella angustata</i>                 | 0       | 100%       | 57.03%     | KAH8198320.1     |
| putative polyketide synthase [Truncatella angustata]                               | <i>Truncatella angustata</i>                 | 0       | 98%        | 56.71%     | XP_045957259.1   |
| Nonribosomal peptide synthetase-like protein [Acremonium chrysogenum ATCC 11550]   | <i>Acremonium chrysogenum ATCC 11550</i>     | 0       | 98%        | 54.02%     | KFH40504.1       |
| hypothetical protein AJ80_00462 [Polytolypa hystricis UAMH7299]                    | <i>Polytolypa hystricis UAMH7299</i>         | 0       | 100%       | 54.32%     | PGH27912.1       |
| hypothetical protein EYB26_003290 [Talaromyces marneffei]                          | <i>Talaromyces marneffei</i>                 | 0       | 99%        | 45.34%     | QGA15630.1       |
| polyketide synthase, putative [Talaromyces marneffei ATCC 18224]                   | <i>Talaromyces marneffei ATCC 18224</i>      | 0       | 99%        | 45.60%     | XP_002151741.1   |
| hypothetical protein EYB25_008228 [Talaromyces marneffei]                          | <i>Talaromyces marneffei</i>                 | 0       | 99%        | 45.31%     | KAE8549704.1     |
| Highly reducing polyketide synthase AFT9-1 [Colletotrichum orbiculare MAFF 240422] | <i>Colletotrichum orbiculare MAFF 240422</i> | 0       | 99%        | 45.39%     | TDZ19628.1       |
| Highly reducing polyketide synthase AFT9-1 [Colletotrichum siamense]               | <i>Colletotrichum siamense</i>               | 0       | 99%        | 45.13%     | KAF4808378.1     |
| hypothetical protein K456DRAFT_1842648 [Colletotrichum gloeosporioides 23]         | <i>Colletotrichum gloeosporioides 23</i>     | 0       | 99%        | 45.18%     | KAH9230444.1     |

| <i>V. klebahnii</i> _VRPKS-I-21_contig_NMXL01000013                                                |                                    |         |            |            |                  |
|----------------------------------------------------------------------------------------------------|------------------------------------|---------|------------|------------|------------------|
| Gene name                                                                                          | Species of blast hit               | E value | % Coverage | % identity | Accession number |
| polyketide synthase [Colletotrichum plurivorum]                                                    | <i>Colletotrichum plurivorum</i>   | 0       | 92%        | 69.20%     | KAF6826616.1     |
| beta-ketoacyl synthase domain-containing protein [Colletotrichum fiorinae PJ7]                     | <i>Colletotrichum fiorinae PJ7</i> | 0       | 92%        | 68.59%     | EXF80608.1       |
| Lovastatin diketide synthase LovF 2 [Colletotrichum chlorophyti]                                   | <i>Colletotrichum chlorophyti</i>  | 0       | 92%        | 69.39%     | OLN91972.1       |
| polyketide synthase [Colletotrichum musicola]                                                      | <i>Colletotrichum musicola</i>     | 0       | 92%        | 68.98%     | KAF6845034.1     |
| beta-ketoacyl synthase domain-containing protein [Colletotrichum scovillei]                        | <i>Colletotrichum scovillei</i>    | 0       | 92%        | 69.14%     | KAG7053867.1     |
| polyketide synthase [Colletotrichum sojae]                                                         | <i>Colletotrichum sojae</i>        | 0       | 92%        | 69.07%     | KAF6809610.1     |
| polyketide synthase (beta-ketoacyl synthase domain-containing protein) [Colletotrichum tofieldiae] | <i>Colletotrichum tofieldiae</i>   | 0       | 92%        | 68.45%     | KZL70949.1       |
| uncharacterized protein CkaCkLH20_04708 [Colletotrichum karsti]                                    | <i>Colletotrichum karsti</i>       | 0       | 92%        | 68.39%     | XP_038747034.1   |
| beta-ketoacyl synthase domain-containing protein [Colletotrichum scovillei]                        | <i>Colletotrichum scovillei</i>    | 0       | 92%        | 68.54%     | XP_035330138.1   |
| beta-ketoacyl synthase domain-containing protein [Colletotrichum simmondsii]                       | <i>Colletotrichum simmondsii</i>   | 0       | 92%        | 68.78%     | KXH36687.1       |

| V. klebahnii_ VRPKS-I-12_contig_NMXL01000003                                      |                                       |         |            |            |                  |
|-----------------------------------------------------------------------------------|---------------------------------------|---------|------------|------------|------------------|
| Gene name                                                                         | Species of blast hit                  | E value | % Coverage | % identity | Accession number |
| polyketide synthase [Sodiomyces alkalinus F11]                                    | <i>Sodiomyces alkalinus F11</i>       | 0       | 97%        | 75.14%     | XP_028469272.1   |
| beta-ketoacyl synthase domain-containing protein [Colletotrichum salicis]         | <i>Colletotrichum salicis</i>         | 0       | 97%        | 72.52%     | KXH33485.1       |
| beta-ketoacyl synthase domain-containing protein [Colletotrichum fiorinae PJ7]    | <i>Colletotrichum fiorinae PJ7</i>    | 0       | 97%        | 72.47%     | EXF80071.1       |
| beta-ketoacyl synthase domain-containing protein [Colletotrichum nymphaeae SA-01] | <i>Colletotrichum nymphaeae SA-01</i> | 0       | 97%        | 72.41%     | KXH30697.1       |
| beta-ketoacyl synthase domain-containing protein [Colletotrichum scovillei]       | <i>Colletotrichum scovillei</i>       | 0       | 97%        | 72.37%     | XP_035338903.1   |
| beta-ketoacyl synthase domain-containing protein [Colletotrichum orchidophilum]   | <i>Colletotrichum orchidophilum</i>   | 0       | 97%        | 72.19%     | XP_022470047.1   |
| beta-ketoacyl synthase domain-containing protein [Colletotrichum simmondsii]      | <i>Colletotrichum simmondsii</i>      | 0       | 97%        | 72.27%     | KXH41720.1       |
| hypothetical protein G7Z17_g6123 [Cylindrodendrum hubeiense]                      | <i>Cylindrodendrum hubeiense</i>      | 0       | 97%        | 65.71%     | KAF7549858.1     |
| polyketide synthase [Pochonia chlamydosporia 170]                                 | <i>Pochonia chlamydosporia 170</i>    | 0       | 97%        | 65.77%     | XP_018147207.1   |
| polyketide synthase [Thelonectria olida]                                          | <i>Thelonectria olida</i>             | 0       | 97%        | 65.88%     | KAH6899708.1     |

| V. klebahnii_ VNRPKS-I-16_contig_NMXL01000003                                             |                                             |         |            |            |                  |
|-------------------------------------------------------------------------------------------|---------------------------------------------|---------|------------|------------|------------------|
| Gene name                                                                                 | Species of blast hit                        | E value | % Coverage | % identity | Accession number |
| uncharacterized protein CkaCkLH20_00019 [Colletotrichum karsti]                           | <i>Colletotrichum karsti</i>                | 0       | 100%       | 79.23%     | XP_038751444.1   |
| hypothetical protein CGLO_05047 [Colletotrichum gloeosporioides Cg-14]                    | <i>Colletotrichum gloeosporioides Cg-14</i> | 0       | 100%       | 78.96%     | EQB55056.1       |
| hypothetical protein CcaCcLH18_10320 [Colletotrichum camelliae]                           | <i>Colletotrichum camelliae</i>             | 0       | 100%       | 79.05%     | KAH0426510.1     |
| hypothetical protein K456DRAFT_1724748 [Colletotrichum gloeosporioides 23]                | <i>Colletotrichum gloeosporioides 23</i>    | 0       | 100%       | 78.91%     | KAH9233890.1     |
| Conidial yellow pigment biosynthesis polyketide synthase [Colletotrichum fruticola]       | <i>Colletotrichum fruticola</i>             | 0       | 100%       | 78.91%     | KAF4937522.1     |
| hypothetical protein GQ607_010262 [Colletotrichum asianum]                                | <i>Colletotrichum asianum</i>               | 0       | 100%       | 78.91%     | KAF0322599.1     |
| Conidial yellow pigment biosynthesis polyketide synthase [Colletotrichum gloeosporioides] | <i>Colletotrichum gloeosporioides</i>       | 0       | 100%       | 78.91%     | XP_045268234.1   |
| Conidial yellow pigment biosynthesis polyketide synthase [Colletotrichum viniferum]       | <i>Colletotrichum viniferum</i>             | 0       | 100%       | 78.87%     | KAF4919737.1     |
| Conidial yellow pigment biosynthesis polyketide synthase [Colletotrichum tropicale]       | <i>Colletotrichum tropicale</i>             | 0       | 100%       | 78.87%     | KAF4827098.1     |
| Conidial yellow pigment biosynthesis polyketide synthase [Colletotrichum siamense]        | <i>Colletotrichum siamense</i>              | 0       | 100%       | 78.87%     | KAF4840476.1     |

| <i>V. klebahnii</i> _VRPKS-I-9_contig_NMXL01000011                      |                                            |         |            |            |                  |
|-------------------------------------------------------------------------|--------------------------------------------|---------|------------|------------|------------------|
| Gene name                                                               | Species of blast hit                       | E value | % Coverage | % identity | Accession number |
| AMP-binding enzyme domain-containing protein [Hirsutella rhossiliensis] | <i>Hirsutella rhossiliensis</i>            | 0       | 99%        | 72.49%     | XP_044717051.1   |
| lovastatin nonaketide synthase [Verticillium alfalfae VaMs.102]         | <i>Verticillium alfalfae VaMs.102</i>      | 0       | 100%       | 70.03%     | XP_003005392.1   |
| hypothetical protein HIM_06709 [Hirsutella minnesotensis 3608]          | <i>Hirsutella minnesotensis 3608</i>       | 0       | 99%        | 66.00%     | KJZ73816.1       |
| lovastatin nonaketide synthase [Dactylonectria macrodidyma]             | <i>Dactylonectria macrodidyma</i>          | 0       | 99%        | 57.83%     | KAH7176829.1     |
| lovastatin nonaketide synthase [Aspergillus novofumigatus IBT 16806]    | <i>Aspergillus novofumigatus IBT 16806</i> | 0       | 100%       | 54.74%     | XP_024677790.1   |
| lovastatin nonaketide synthase [Hypoxylon trugodes]                     | <i>Hypoxylon trugodes</i>                  | 0       | 99%        | 52.49%     | KAI1387791.1     |
| hypothetical protein DL768_008516 [Monosporascus sp. mg162]             | <i>Monosporascus sp. mg162</i>             | 0       | 99%        | 50.94%     | RYP45085.1       |
| hypothetical protein JX265_007707 [Wardomyces moseri]                   | <i>Wardomyces moseri</i>                   | 0       | 99%        | 50.58%     | KAI1866406.1     |
| hypothetical protein JN550_003285 [Wardomyces moseri]                   | <i>Wardomyces moseri</i>                   | 0       | 99%        | 50.49%     | KAI1873032.1     |
| hypothetical protein JX266_000322 [Wardomyces moseri]                   | <i>Wardomyces moseri</i>                   | 0       | 99%        | 50.41%     | KAI1855457.1     |

| <i>V. klebahnii</i> _VRPKS-I-2_contig_NMXL01000020           |                                  |         |            |            |                  |
|--------------------------------------------------------------|----------------------------------|---------|------------|------------|------------------|
| Gene name                                                    | Species of blast hit             | E value | % Coverage | % identity | Accession number |
| Fusaridione A synthetase fsdS [Colletotrichum fructicola]    | <i>Colletotrichum fructicola</i> | 0       | 99%        | 86.73%     | KAF4886526.1     |
| Fusaridione A synthetase [Colletotrichum fructicola]         | <i>Colletotrichum fructicola</i> | 0       | 99%        | 86.71%     | XP_031875985.1   |
| putative polyketide synthase [Nemania sp. FL0916]            | <i>Nemania sp. FL0916</i>        | 0       | 99%        | 56.70%     | KAI1177826.1     |
| hypothetical protein ANO14919_082590 [fungal sp. No.14919]   | <i>fungal sp. No.14919</i>       | 0       | 99%        | 56.18%     | GAW18777.1       |
| putative polyketide synthase [Xylaria grammica]              | <i>Xylaria grammica</i>          | 0       | 99%        | 55.70%     | KAI0412784.1     |
| hypothetical protein EKO27_g3160 [Xylaria grammica]          | <i>Xylaria grammica</i>          | 0       | 99%        | 55.58%     | RWA11947.1       |
| ChaA [Chaetomium olivaceum]                                  | <i>Chaetomium olivaceum</i>      | 0       | 99%        | 53.52%     | QJX57338.1       |
| hypothetical protein UA08_04451 [Talaromyces atrovirens]     | <i>Talaromyces atrovirens</i>    | 0       | 99%        | 54.06%     | XP_020120442.1   |
| hypothetical protein LOZ25_002353 [Ophidiomyces ophidiicola] | <i>Ophidiomyces ophidiicola</i>  | 0       | 99%        | 48.60%     | KAI2161307.1     |
| hypothetical protein LOZ59_004326 [Ophidiomyces ophidiicola] | <i>Ophidiomyces ophidiicola</i>  | 0       | 99%        | 48.62%     | KAI1956291.1     |

| <i>V. klebahnii</i> _VRPKS-I-5_contig_NMXL01000008 |                      |         |            |            |                  |
|----------------------------------------------------|----------------------|---------|------------|------------|------------------|
| Gene name                                          | Species of blast hit | E value | % Coverage | % identity | Accession number |

|                     |                                                  |   |      |        |              |
|---------------------|--------------------------------------------------|---|------|--------|--------------|
| polyketide synthase | <i>Biscogniauxia mediterranea</i>                | 0 | 99%  | 64.69% | KAI1485991.1 |
| polyketide synthase | <i>Biscogniauxia sp. FL1348</i>                  | 0 | 99%  | 64.81% | KAI0597589.1 |
| polyketide synthase | <i>Biscogniauxia mediterranea</i>                | 0 | 99%  | 64.80% | KAI1637132.1 |
| polyketide synthase | <i>Rutstroemia sp. NJR-2017a BBW</i>             | 0 | 100% | 43.74% | PQE06091.1   |
| polyketide synthase | <i>Hymenoscyphus varicosporioides</i>            | 0 | 99%  | 41.14% | KAH8646967.1 |
| polyketide synthase | <i>Pseudogymnoascus sp. VKM F-4520 (FW-2644)</i> | 0 | 99%  | 41.47% | KFZ23096.1   |
| polyketide synthase | <i>Pseudogymnoascus sp. VKM F-4519 (FW-2642)</i> | 0 | 99%  | 41.40% | KFZ13457.1   |
| polyketide synthase | <i>Pseudogymnoascus sp. VKM F-4514 (FW-929)</i>  | 0 | 99%  | 41.25% | KFY37827.1   |
| polyketide synthase | <i>Pseudogymnoascus sp. VKM F-3557</i>           | 0 | 99%  | 41.25% | KFX98753.1   |
| polyketide synthase | <i>Chaetomium sp. MPI-CAGE-AT-0009</i>           | 0 | 100% | 67.42% | KAH6844804.1 |

|                                                     |                                    |         |            |            |                  |
|-----------------------------------------------------|------------------------------------|---------|------------|------------|------------------|
| <i>V. klebahnii</i> _VRPKS-I-6_contig_NMXL01000002  |                                    |         |            |            |                  |
| Gene name                                           | Species of blast hit               | E value | % Coverage | % identity | Accession number |
| Polyketide synthase-nonribosomal peptide synthetase | <i>Aspergillus burnettii</i>       | 0       | 99%        | 66.66%     | KAF5861957.1     |
| Polyketide synthase-nonribosomal peptide synthetase | <i>Aspergillus alliaceus</i>       | 0       | 99%        | 66.50%     | KAE8392342.1     |
| Polyketide synthase-nonribosomal peptide synthetase | <i>Aspergillus alliaceus</i>       | 0       | 99%        | 66.47%     | XP_031905223.1   |
| Polyketide synthase-nonribosomal peptide synthetase | <i>Xylariaceae sp. FL0016</i>      | 0       | 99%        | 65.95%     | KAI1344561.1     |
| Polyketide synthase-nonribosomal peptide synthetase | <i>Monosporascus sp. GIB2</i>      | 0       | 99%        | 61.52%     | RYP15707.1       |
| Polyketide synthase-nonribosomal peptide synthetase | <i>Clohesyomyces aquaticus</i>     | 0       | 91%        | 65.96%     | ORY13581.1       |
| Polyketide synthase-nonribosomal peptide synthetase | <i>Didymosphaeria enalia</i>       | 0       | 91%        | 66.10%     | KAF2268091.1     |
| Polyketide synthase-nonribosomal peptide synthetase | <i>Xylariaceae sp. FL0804</i>      | 0       | 99%        | 61.31%     | KAI0484820.1     |
| Polyketide synthase-nonribosomal peptide synthetase | <i>Ophiobolus disseminans</i>      | 0       | 91%        | 64.61%     | KAF2820849.1     |
| Polyketide synthase-nonribosomal peptide synthetase | <i>Xylariomycetidae sp. FL2044</i> | 0       | 99%        | 58.07%     | KAH9905503.1     |

|                                                       |                           |         |            |            |                  |
|-------------------------------------------------------|---------------------------|---------|------------|------------|------------------|
| <i>V. longisporum</i> _VRPKS-I-22_contig_CVQH01005557 |                           |         |            |            |                  |
| Gene name                                             | Top blast hit             | E value | % Coverage | % identity | Accession number |
| polyketide synthase                                   | <i>Fusarium mexicanum</i> | 0       | 99%        | 70.23%     | KAF5539484.1     |

|                                  |                                   |   |      |        |                |
|----------------------------------|-----------------------------------|---|------|--------|----------------|
| putative polyketide synthase     | <i>Fusarium dlamini</i>           | 0 | 99%  | 70.38% | ALQ32831.1     |
| polyketide synthase              | <i>Fusarium subglutinans</i>      | 0 | 99%  | 70.16% | XP_036534733.1 |
| polyketide synthase              | <i>Fusarium acutatum</i>          | 0 | 99%  | 70.49% | KAF4428951.1   |
| hypothetical protein FSARC_14608 | <i>Fusarium sarcochroum</i>       | 0 | 100% | 70.28% | KAF4944666.1   |
| polyketide synthase              | <i>Fusarium pseudoanthophilum</i> | 0 | 100% | 70.30% | KAF5573817.1   |
| putative polyketide synthase     | <i>Fusarium miscanthi</i>         | 0 | 99%  | 70.59% | ALQ32877.1     |
| putative polyketide synthase     | <i>Fusarium aywerte</i>           | 0 | 100% | 69.65% | ALQ32768.1     |
| polyketide synthase              | <i>Fusarium mundagurra</i>        | 0 | 99%  | 70.03% | KAF5716826.1   |
| polyketide synthase              | <i>Fusarium denticulatum</i>      | 0 | 100% | 70.09% | KAF5687147.1   |

|                                                       |                                       |         |            |            |                  |
|-------------------------------------------------------|---------------------------------------|---------|------------|------------|------------------|
| <i>V. longisporum_</i> VRPKS-I-23_contig_CVQH01020307 |                                       |         |            |            |                  |
| Gene name                                             | Top blast hit                         | E value | % Coverage | % identity | Accession number |
| phenolphthiocerol synthesis polyketide synthase ppsA  | <i>Sodionmyces alkalinus F11</i>      | 0       | 98%        | 47.31%     | XP_028462492.1   |
| phenolphthiocerol synthesis polyketide synthase ppsA  | <i>Plectosphaerella plurivora</i>     | 0       | 99%        | 42.51%     | KAH6697431.1     |
| phenolphthiocerol synthesis polyketide synthase ppsA  | <i>Plectosphaerella cucumerina</i>    | 0       | 99%        | 42.47%     | KAH7358949.1     |
| hypothetical protein BJF96_g3857                      | <i>Verticillium dahliae</i>           | 0       | 37%        | 94.38%     | PNH33126.1       |
| Lovastatin diketide synthase LovF 13                  | <i>Colletotrichum chlorophyti</i>     | 0       | 98%        | 41.90%     | OLN85715.1       |
| beta-ketoacyl synthase domain-containing protein      | <i>Colletotrichum incanum</i>         | 0       | 99%        | 41.90%     | OHW97630.1       |
| Reducing polyketide synthase FUB1                     | <i>Colletotrichum gloeosporioides</i> | 0       | 97%        | 42.17%     | XP_045256339.1   |
| Reducing polyketide synthase FUB1                     | <i>Colletotrichum aenigma</i>         | 0       | 97%        | 42.05%     | XP_037174401.1   |
| beta-ketoacyl synthase domain-containing protein      | <i>Colletotrichum karsti</i>          | 0       | 97%        | 42.07%     | XP_038741012.1   |
| Reducing polyketide synthase                          | <i>Colletotrichum fruticola</i>       | 0       | 97%        | 42.05%     | XP_031892623.1   |

|                                                       |                                                 |         |            |            |                  |
|-------------------------------------------------------|-------------------------------------------------|---------|------------|------------|------------------|
| <i>V. longisporum_</i> VRPKS-I-17_contig_CVQH01023638 |                                                 |         |            |            |                  |
| Gene name                                             | Top blast hit                                   | E value | % Coverage | % identity | Accession number |
| Lovastatin diketide synthase LovF 16                  | <i>Colletotrichum chlorophyti</i>               | 0       | 97%        | 69.51%     | OLN86478.1       |
| polyketide synthase                                   | <i>Colletotrichum truncatum</i>                 | 0       | 97%        | 68.54%     | XP_036585096.1   |
| Reducing polyketide synthase PKS2                     | <i>Colletotrichum trifolii</i>                  | 0       | 97%        | 68.49%     | TDZ28230.1       |
| Reducing polyketide synthase PKS2                     | <i>Colletotrichum orbiculare</i><br>MAFF 240422 | 0       | 97%        | 68.53%     | TDZ25780.1       |
| Reducing polyketide synthase PKS2                     | <i>Colletotrichum sidae</i>                     | 0       | 97%        | 68.44%     | TEA18683.1       |
| beta-ketoacyl synthase domain-containing protein      | <i>Colletotrichum salicis</i>                   | 0       | 97%        | 68.72%     | KXH66496.1       |

|                                                  |                                    |   |     |        |              |
|--------------------------------------------------|------------------------------------|---|-----|--------|--------------|
| polyketide synthase                              | <i>Colletotrichum musicola</i>     | 0 | 97% | 68.84% | KAF6830768.1 |
| beta-ketoacyl synthase domain-containing protein | <i>Colletotrichum fiorinae PJ7</i> | 0 | 97% | 68.81% | EXF85385.1   |
| Reducing polyketide synthase PKS2                | <i>Colletotrichum spinosum</i>     | 0 | 97% | 68.39% | TDZ31026.1   |
| beta-ketoacyl synthase domain-containing protein | <i>Colletotrichum simmondsii</i>   | 0 | 97% | 68.81% | KXH44475.1   |

|                                                       |                                       |         |            |            |                  |
|-------------------------------------------------------|---------------------------------------|---------|------------|------------|------------------|
| <i>V. longisporum_</i> VRPKS-I-23_contig_CVQH01020607 |                                       |         |            |            |                  |
| Gene name                                             | Top blast hit                         | E value | % Coverage | % identity | Accession number |
| phenolphthiocerol synthesis polyketide synthase ppsA  | <i>Sodomyces alkalinus F11</i>        | 0       | 99%        | 49.04%     | XP_028462492.1   |
| phenolphthiocerol synthesis polyketide synthase ppsA  | <i>Plectosphaerella plurivora</i>     | 0       | 100%       | 42.91%     | KAH6697431.1     |
| phenolphthiocerol synthesis polyketide synthase ppsA  | <i>Plectosphaerella cucumerina</i>    | 0       | 99%        | 42.62%     | KAH7358949.1     |
| Lovastatin diketide synthase LovF 13                  | <i>Colletotrichum chlorophyti</i>     | 0       | 99%        | 42.30%     | OLN85715.1       |
| Reducing polyketide synthase FUB1                     | <i>Colletotrichum gloeosporioides</i> | 0       | 98%        | 42.41%     | XP_045256339.1   |
| beta-ketoacyl synthase domain-containing protein      | <i>Colletotrichum incanum</i>         | 0       | 99%        | 42.15%     | OHW97630.1       |
| acyl transferase domain-containing protein            | <i>Hirsutella rhossiliensis</i>       | 0       | 99%        | 41.98%     | XP_044721574.1   |
| Reducing polyketide synthase FUB1                     | <i>Colletotrichum aenigma</i>         | 0       | 98%        | 42.26%     | XP_037174401.1   |
| hypothetical protein CEP54_008569                     | <i>Fusarium sp. AF-8</i>              | 0       | 99%        | 42.43%     | RSL56874.1       |
| beta-ketoacyl synthase domain-containing protein      | <i>Colletotrichum karstii</i>         | 0       | 98%        | 41.96%     | XP_038741012.1   |

|                                                       |                                                 |         |            |            |                  |
|-------------------------------------------------------|-------------------------------------------------|---------|------------|------------|------------------|
| <i>V. longisporum_</i> VRPKS-I-17_contig_CVQH01000225 |                                                 |         |            |            |                  |
| Gene name                                             | Top blast hit                                   | E value | % Coverage | % identity | Accession number |
| Lovastatin diketide synthase LovF 16                  | <i>Colletotrichum chlorophyti</i>               | 0       | 99%        | 69.14%     | OLN86478.1       |
| hypothetical protein VDGD_08448                       | <i>Verticillium dahliae</i>                     | 0       | 69%        | 98.53%     | RBQ89174.1       |
| polyketide synthase                                   | <i>Colletotrichum truncatum</i>                 | 0       | 99%        | 68.60%     | XP_036585096.1   |
| Reducing polyketide synthase PKS2                     | <i>Colletotrichum trifolii</i>                  | 0       | 99%        | 68.33%     | TDZ28230.1       |
| Reducing polyketide synthase PKS2                     | <i>Colletotrichum orbiculare</i><br>MAFF 240422 | 0       | 99%        | 68.38%     | TDZ25780.1       |
| Reducing polyketide synthase PKS2                     | <i>Colletotrichum sidae</i>                     | 0       | 99%        | 68.29%     | TEA18683.1       |
| Reducing polyketide synthase PKS2                     | <i>Colletotrichum spinosum</i>                  | 0       | 99%        | 68.25%     | TDZ31026.1       |
| polyketide synthase                                   | <i>Colletotrichum musicola</i>                  | 0       | 99%        | 68.41%     | KAF6830768.1     |
| beta-ketoacyl synthase domain-containing protein      | <i>Colletotrichum fiorinae PJ7</i>              | 0       | 99%        | 68.56%     | EXF85385.1       |
| beta-ketoacyl synthase domain-containing protein      | <i>Colletotrichum salicis</i>                   | 0       | 99%        | 68.43%     | KXH66496.1       |

|                                                       |                                 |         |            |            |                  |
|-------------------------------------------------------|---------------------------------|---------|------------|------------|------------------|
| <i>V. longisporum_</i> VRPKS-I-19_contig_CVQH01002447 |                                 |         |            |            |                  |
| Gene name                                             | Top blast hit                   | E value | % Coverage | % identity | Accession number |
| hypothetical protein J1614_005792                     | <i>Leptosphaeria biglobosa</i>  | 0       | 100%       | 77.60%     | KAH9873394.1     |
| hypothetical protein BN1723_002883                    | <i>Verticillium longisporum</i> | 0       | 64%        | 96.78%     | CRK22444.1       |
| Type I Iterative PKS                                  | <i>Claviceps purpurea</i>       | 0       | 100%       | 61.46%     | KAG6264852.1     |
| Type I Iterative PKS                                  | <i>Claviceps purpurea</i>       | 0       | 100%       | 61.51%     | KAG6168136.1     |
| Type I Iterative PKS                                  | <i>Claviceps purpurea</i>       | 0       | 100%       | 61.40%     | KAG6257628.1     |
| Type I Iterative PKS                                  | <i>Claviceps purpurea</i>       | 0       | 100%       | 61.30%     | KAG6313294.1     |
| Type I Iterative PKS                                  | <i>Claviceps pusilla</i>        | 0       | 100%       | 62.07%     | KAG6001262.1     |
| Type I Iterative PKS                                  | <i>Claviceps purpurea</i>       | 0       | 100%       | 61.40%     | KAG6172346.1     |
| Type I Iterative PKS                                  | <i>Claviceps purpurea</i>       | 0       | 100%       | 61.46%     | KAG6178588.1     |
| Type I Iterative PKS                                  | <i>Claviceps purpurea</i>       | 0       | 100%       | 61.40%     | KAG6319079.1     |

|                                                       |                                 |         |            |            |                  |
|-------------------------------------------------------|---------------------------------|---------|------------|------------|------------------|
| <i>V. longisporum_</i> VRPKS-I-19_contig_CVQH01000001 |                                 |         |            |            |                  |
| Gene name                                             | Top blast hit                   | E value | % Coverage | % identity | Accession number |
| hypothetical protein J1614_005792                     | <i>Leptosphaeria biglobosa</i>  | 0       | 99%        | 78.27%     | KAH9873394.1     |
| Reducing polyketide synthase PKS2 like protein        | <i>Verticillium longisporum</i> | 0       | 73%        | 93.72%     | KAG7126724.1     |
| Type I Iterative PKS                                  | <i>Claviceps purpurea</i>       | 0       | 97%        | 62.51%     | KAG6264852.1     |
| Type I Iterative PKS                                  | <i>Claviceps purpurea</i>       | 0       | 97%        | 62.46%     | KAG6168136.1     |
| Type I Iterative PKS                                  | <i>Claviceps purpurea</i>       | 0       | 97%        | 62.46%     | KAG6257628.1     |
| Type I Iterative PKS                                  | <i>Claviceps purpurea</i>       | 0       | 97%        | 62.41%     | KAG6178588.1     |
| Type I Iterative PKS                                  | <i>Claviceps purpurea</i>       | 0       | 97%        | 62.41%     | KAG6313294.1     |
| Type I Iterative PKS                                  | <i>Claviceps purpurea</i>       | 0       | 97%        | 62.36%     | KAG6172346.1     |
| Type I Iterative PKS                                  | <i>Claviceps purpurea</i>       | 0       | 97%        | 62.31%     | KAG6278039.1     |
| Type I Iterative PKS                                  | <i>Claviceps purpurea</i>       | 0       | 97%        | 62.31%     | KAG6152537.1     |

|                                                       |                                      |          |            |            |                  |
|-------------------------------------------------------|--------------------------------------|----------|------------|------------|------------------|
| <i>V. longisporum_</i> VRPKS-I-19_contig_CVQH01000001 |                                      |          |            |            |                  |
| Gene name                                             | Top blast hit                        | E value  | % Coverage | % identity | Accession number |
| hypothetical protein J1614_005792                     | <i>Leptosphaeria biglobosa</i>       | 9.00E-17 | 97%        | 85.51%     | KAH9873394.1     |
| hypothetical protein E4U41_004656                     | <i>Claviceps citrina</i>             | 7.00E-10 | 94%        | 71.64%     | KAG6015267.1     |
| hypothetical protein HIM_05896                        | <i>Hirsutella minnesotensis</i> 3608 | 2.00E-09 | 92%        | 68.18%     | KJZ74779.1       |
| hypothetical protein E4U42_001802                     | <i>Claviceps africana</i>            | 3.00E-09 | 94%        | 71.64%     | KAG5912807.1     |



|                                            |                               |          |     |        |                |
|--------------------------------------------|-------------------------------|----------|-----|--------|----------------|
| hypothetical protein HIM_06262             | Hirsutella minnesotensis 3608 | 5.00E-09 | 88% | 66.67% | KJZ74256.1     |
| hypothetical protein E4U54_004405          | Claviceps lovelessii          | 1.00E-08 | 95% | 69.12% | KAG6015049.1   |
| acyl transferase domain-containing protein | Hirsutella rhossiliensis      | 1.00E-08 | 97% | 60.87% | XP_044719201.1 |
| Type I Iterative PKS                       | Claviceps pusilla             | 4.00E-08 | 95% | 69.12% | KAG6001262.1   |
| Type I Iterative PKS                       | Claviceps cyperi              | 5.00E-08 | 94% | 70.15% | KAG5972447.1   |
| hypothetical protein CDD83_5286            | Cordyceps sp. RAO-2017        | 5.00E-08 | 94% | 64.18% | PHH89775.1     |

|                                                                                                                                             |                                       |          |            |            |                  |
|---------------------------------------------------------------------------------------------------------------------------------------------|---------------------------------------|----------|------------|------------|------------------|
| <i>V. longisporum</i> _VRPKS-I-26_contig_CVQH01000001                                                                                       |                                       |          |            |            |                  |
| Gene name                                                                                                                                   | Top blast hit                         | E value  | % Coverage | % identity | Accession number |
| hypothetical protein F5B20DRAFT_586947                                                                                                      | <i>Whalleya microplaca</i>            | 0.00E+00 | 99%        | 63.19%     | KAI1073750.1     |
| hypothetical protein DL768_003915                                                                                                           | <i>Monosporascus sp. mg162</i>        | 0.00E+00 | 97%        | 62.84%     | RYP50633.1       |
| hypothetical protein BN1708_007417                                                                                                          | <i>Verticillium longisporum</i>       | 0.00E+00 | 76%        | 97.21%     | CRK37551.1       |
| RecName: Full=Highly reducing polyketide synthase apmlA; Short=HRPKS apmlA; AltName: Full=Phaeosporide A biosynthesis cluster protein apmlA | <i>Apiospora sphaerosperma</i>        | 0.00E+00 | 98%        | 59.98%     | P0CU84.1         |
| putative polyketide synthase                                                                                                                | <i>Xylariales sp. PMI_506</i>         | 0.00E+00 | 97%        | 53.15%     | KAH8657763.1     |
| hypothetical protein BN1708_001184                                                                                                          | <i>Verticillium longisporum</i>       | 0.00E+00 | 74%        | 92.92%     | CRK33507.1       |
| reducing type I polyketide synthase                                                                                                         | <i>Plectosphaerella cucumerina</i>    | 0.00E+00 | 97%        | 53.41%     | KAH7358079.1     |
| Lovastatin diketide synthase protein                                                                                                        | <i>Rutstroemia sp. NJR-2017a WRK4</i> | 0.00E+00 | 98%        | 53.96%     | PQE16274.1       |
| Fumagillin dodecapentaenoate synthase                                                                                                       | <i>Lachnellula willkommii</i>         | 0.00E+00 | 98%        | 53.06%     | TVY89575.1       |
| polyketide synthase 2                                                                                                                       | <i>Didymosphaeria enalia</i>          | 0.00E+00 | 97%        | 52.43%     | KAF2259783.1     |

|                                                          |                                             |         |            |            |                  |
|----------------------------------------------------------|---------------------------------------------|---------|------------|------------|------------------|
| <i>V. longisporum</i> _VNRPKS-I-1_contig_CVQH01019335    |                                             |         |            |            |                  |
| Gene name                                                | Top blast hit                               | E value | % Coverage | % identity | Accession number |
| uncharacterized protein CkaCkLH20_00019                  | <i>Colletotrichum karsti</i>                | 0       | 100%       | 75.58%     | XP_038751444.1   |
| hypothetical protein CGLO_05047                          | <i>Colletotrichum gloeosporioides Cg-14</i> | 0       | 100%       | 75.23%     | EQB55056.1       |
| hypothetical protein GQ607_010262                        | <i>Colletotrichum asianum</i>               | 0       | 100%       | 75.23%     | KAF0322599.1     |
| Conidial yellow pigment biosynthesis polyketide synthase | <i>Colletotrichum fruticola</i>             | 0       | 100%       | 75.18%     | KAF4937522.1     |
| hypothetical protein CcaCcLH18_10320                     | <i>Colletotrichum camelliae</i>             | 0       | 100%       | 75.09%     | KAH0426510.1     |
| Conidial yellow pigment biosynthesis polyketide synthase | <i>Colletotrichum gloeosporioides</i>       | 0       | 100%       | 75.18%     | XP_045268234.1   |

|                                                          |                                          |   |      |        |                |
|----------------------------------------------------------|------------------------------------------|---|------|--------|----------------|
| Conidial yellow pigment biosynthesis polyketide synthase | <i>Colletotrichum fructicola</i>         | 0 | 100% | 75.14% | XP_031880204.1 |
| Conidial yellow pigment biosynthesis polyketide synthase | <i>Colletotrichum siamense</i>           | 0 | 100% | 75.14% | KAF4812766.1   |
| Conidial yellow pigment biosynthesis polyketide synthase | <i>Colletotrichum tropicale</i>          | 0 | 100% | 75.27% | KAF4827098.1   |
| hypothetical protein K456DRAFT_1724748                   | <i>Colletotrichum gloeosporioides</i> 23 | 0 | 100% | 75.14% | KAH9233890.1   |

|                                                       |                                       |          |            |            |                  |
|-------------------------------------------------------|---------------------------------------|----------|------------|------------|------------------|
| <i>V. longisporum_</i> VNRPKS-I-1_contig_CVQH01006668 |                                       |          |            |            |                  |
| Gene name                                             | Top blast hit                         | E value  | % Coverage | % identity | Accession number |
| polyketide synthase                                   | <i>Sodionmyces alkalinus F11</i>      | 2.00E-54 | 67%        | 53.94%     | XP_028469272.1   |
| beta-ketoacyl synthase domain-containing protein      | <i>Colletotrichum fioriniae PJ7</i>   | 9.00E-54 | 64%        | 56.60%     | EXF80071.1       |
| beta-ketoacyl synthase domain-containing protein      | <i>Colletotrichum nymphaeae SA-01</i> | 2.00E-53 | 64%        | 57.23%     | KXH30697.1       |
| beta-ketoacyl synthase domain-containing protein      | <i>Colletotrichum scovillei</i>       | 2.00E-53 | 64%        | 57.23%     | XP_035338903.1   |
| beta-ketoacyl synthase domain-containing protein      | <i>Colletotrichum salicis</i>         | 2.00E-53 | 64%        | 56.60%     | KXH33485.1       |
| beta-ketoacyl synthase domain-containing protein      | <i>Colletotrichum orchidophilum</i>   | 1.00E-50 | 64%        | 54.38%     | XP_022470047.1   |
| beta-ketoacyl synthase domain-containing protein      | <i>Colletotrichum simmondsii</i>      | 2.00E-49 | 64%        | 55.21%     | KXH41720.1       |
| polyketide synthase                                   | <i>Thelonectria olida</i>             | 2.00E-48 | 64%        | 52.47%     | KAH6899708.1     |
| Polyketide synthase-nonribosomal peptide synthetase   | <i>Neonectria ditissima</i>           | 2.00E-48 | 64%        | 50.62%     | KPM42068.1       |
| hypothetical protein G7Z17_g6123                      | <i>Cylindrodendrum hubeiense</i>      | 3.00E-46 | 63%        | 50.00%     | KAF7549858.1     |

|                                                       |                                          |         |            |            |                  |
|-------------------------------------------------------|------------------------------------------|---------|------------|------------|------------------|
| <i>V. longisporum_</i> VRPKS-I-11_contig_CVQH01006891 |                                          |         |            |            |                  |
| Gene name                                             | Top blast hit                            | E value | % Coverage | % identity | Accession number |
| Nonribosomal peptide synthetase-like protein          | <i>Acremonium chrysogenum ATCC 11550</i> | 0       | 80%        | 44.24%     | KFH45364.1       |
| hypothetical protein F5Y06DRAFT_297186                | <i>Hypoxylon sp. FL0890</i>              | 0       | 81%        | 40.81%     | KAI0837758.1     |
| polyketide synthase                                   | <i>Lasiodiplodia theobromae</i>          | 0       | 81%        | 39.90%     | KAF9630276.1     |
| Fusarin C synthetase                                  | <i>Lasiodiplodia theobromae</i>          | 0       | 81%        | 39.68%     | KAB2573439.1     |
| uncharacterized protein BCR38DRAFT_413069             | <i>Pseudomassariella vexata</i>          | 0       | 81%        | 40.05%     | XP_040711562.1   |
| uncharacterized protein K452DRAFT_243204              | <i>Aplosporella prunicola CBS 121167</i> | 0       | 81%        | 39.24%     | XP_033401020.1   |
| Polyketide synthase                                   | <i>Lasiodiplodia theobromae</i>          | 0       | 81%        | 39.12%     | XP_035374836.1   |
| hypothetical protein Egran_04668                      | <i>Elaphomyces granulatus</i>            | 0       | 81%        | 38.90%     | OXV07567.1       |

|                                      |                                          |   |     |         |              |
|--------------------------------------|------------------------------------------|---|-----|---------|--------------|
| hypothetical protein ASPCADRAFT_5570 | <i>Aspergillus carbonarius</i> ITEM 5010 | 0 | 81% | 36.86%  | OOF95055.1   |
| Fusarin C synthetase like protein    | <i>Verticillium longisporum</i>          | 0 | 23% | 100.00% | KAG7106604.1 |

|                                                      |                                 |         |            |            |                  |
|------------------------------------------------------|---------------------------------|---------|------------|------------|------------------|
| <i>V. longisporum</i> _VRPKS-I-8_contig_CVQH01025950 |                                 |         |            |            |                  |
| Gene name                                            | Top blast hit                   | E value | % Coverage | % identity | Accession number |
| hypothetical protein F66182_1560                     | <i>Fusarium</i> sp. NRRL 66182  | 0       | 98%        | 69.55%     | KAF5026352.1     |
| hypothetical protein VDGD_21529                      | <i>Verticillium dahliae</i>     | 0       | 59%        | 94.22%     | RBQ70014.1       |
| polyketide synthase                                  | <i>Stemphylium lycopersici</i>  | 0       | 84%        | 72.83%     | KNG48001.1       |
| putative polyketide synthase                         | <i>Stemphylium lycopersici</i>  | 0       | 96%        | 72.83%     | RAR08647.1       |
| polyketide synthase                                  | <i>Stemphylium lycopersici</i>  | 0       | 96%        | 72.94%     | RAR12984.1       |
| putative polyketide synthase                         | <i>Fusarium babinda</i>         | 0       | 98%        | 65.77%     | ALQ32784.1       |
| putative polyketide synthase                         | <i>Fusarium austroafricanum</i> | 0       | 98%        | 65.05%     | KAF4442643.1     |
| polyketide synthase                                  | <i>Fusarium napiforme</i>       | 0       | 98%        | 64.19%     | KAF5554444.1     |
| polyketide synthase                                  | <i>Fusarium tjaetaba</i>        | 0       | 98%        | 64.24%     | XP_037202727.1   |
| hypothetical protein IL306_006708                    | <i>Fusarium</i> sp. DS 682      | 0       | 98%        | 63.66%     | KAF9775208.1     |

|                                                                                                                         |                                                 |         |            |            |                  |
|-------------------------------------------------------------------------------------------------------------------------|-------------------------------------------------|---------|------------|------------|------------------|
| <i>V. longisporum</i> _VRPKS-I-1_contig_CVQH01027305                                                                    |                                                 |         |            |            |                  |
| Gene name                                                                                                               | Top blast hit                                   | E value | % Coverage | % identity | Accession number |
| polyketide synthase                                                                                                     | <i>Halenospora varia</i>                        | 0       | 99%        | 42.69%     | KAH6673321.1     |
| putative hybrid NRPS/PKS enzyme                                                                                         | <i>Acephala macrosclerotiorum</i>               | 0       | 99%        | 41.53%     | KAF8856698.1     |
| hypothetical protein BKA64DRAFT_721680                                                                                  | <i>Leotiomycetes</i> sp. MPI-SDFR-AT-0126       | 0       | 99%        | 40.98%     | KAH7407938.1     |
| hypothetical protein HETSPECRED_009709                                                                                  | <i>Heterodermia speciosa</i>                    | 0       | 99%        | 40.82%     | CAF9935239.1     |
| hypothetical protein BCR34DRAFT_634445                                                                                  | <i>Clohesyomyces aquaticus</i>                  | 0       | 95%        | 41.71%     | ORY17104.1       |
| RecName: Full=Hybrid PKS-NRPS synthetase poxE; Short=PKS-NRPS; AltName: Full=Oxaleimides biosynthesis cluster protein E | <i>Penicillium oxalicum</i> 114-2               | 0       | 99%        | 41.08%     | S7ZFK6.1         |
| RecName: Full=Hybrid PKS-NRPS synthetase poxE; Short=PKS-NRPS; AltName: Full=Oxaleimides biosynthesis cluster protein E | <i>Penicillium oxalicum</i>                     | 0       | 99%        | 41.03%     | A0A1W5T1U1.1     |
| hypothetical protein DL98DRAFT_604524                                                                                   | <i>Cadophora</i> sp. DSE1049                    | 0       | 99%        | 40.36%     | PVH74406.1       |
| polyketide synthase                                                                                                     | <i>Rhexocercosporidium</i> sp. MPI-PUGE-AT-0058 | 0       | 99%        | 40.33%     | KAH7326983.1     |
| putative hybrid NRPS/PKS enzyme                                                                                         | <i>Aspergillus heteromorphus</i> CBS 117.55     | 0       | 99%        | 41.14%     | XP_025394747.1   |

| <i>V. longisporum_</i> VRPKS-I-1_contig_CVQH01003891 |                                                 |         |            |            |                  |
|------------------------------------------------------|-------------------------------------------------|---------|------------|------------|------------------|
| Gene name                                            | Top blast hit                                   | E value | % Coverage | % identity | Accession number |
| putative hybrid NRPS/PKS enzyme                      | <i>Didymosphaeria enalia</i>                    | 0       | 99%        | 49.05%     | KAF2268646.1     |
| polyketide synthase                                  | <i>Halenospora varia</i>                        | 0       | 94%        | 50.03%     | KAH6673321.1     |
| hypothetical protein KIY56_004012                    | <i>Pseudotulostoma volvatum</i>                 | 0       | 94%        | 50.08%     | KAG9375044.1     |
| polyketide synthase                                  | <i>Saccharata proteae</i> CBS 121410            | 0       | 94%        | 50.00%     | KAF2084690.1     |
| amino acid adenylation domain-containing protein     | <i>Hymenoscyphus varicosporioides</i>           | 0       | 95%        | 49.76%     | KAH8646967.1     |
| Acetyl-CoA synthetase-like protein                   | <i>Glarea lozoyensis</i> ATCC 20868             | 0       | 99%        | 48.05%     | XP_008078954.1   |
| hypothetical protein HYFRA_00007390                  | <i>Hymenoscyphus fraxineus</i>                  | 0       | 99%        | 47.56%     | CAG8951474.1     |
| related to polyketide synthase                       | <i>Rhynchosporium agropyri</i>                  | 0       | 94%        | 47.73%     | CZT02515.1       |
| related to polyketide synthase                       | <i>Rhynchosporium commune</i>                   | 0       | 94%        | 47.67%     | CZS89930.1       |
| hypothetical protein V495_06911                      | <i>Pseudogymnoascus</i> sp. VKM F-4514 (FW-929) | 0       | 94%        | 48.66%     | KFY37827.1       |

| <i>V. nonalfalfae_</i> VRPKS-I-22_NW_021167278    |                                   |         |             |            |                |
|---------------------------------------------------|-----------------------------------|---------|-------------|------------|----------------|
| Gene name                                         | Species of blast hit              | E value | Query Cover | Per. Ident | Accession      |
| polyketide synthase [Fusarium mexicanum]          | <i>Fusarium mexicanum</i>         | 0       | 99%         | 70.41%     | KAF5539484.1   |
| putative polyketide synthase [Fusarium dlamini]   | <i>Fusarium dlamini</i>           | 0       | 99%         | 70.60%     | ALQ32831.1     |
| polyketide synthase [Fusarium subglutinans]       | <i>Fusarium subglutinans</i>      | 0       | 99%         | 70.48%     | XP_036534733.1 |
| polyketide synthase [Fusarium acutatum]           | <i>Fusarium acutatum</i>          | 0       | 99%         | 70.59%     | KAF4428951.1   |
| polyketide synthase [Fusarium pseudoanthophilum]  | <i>Fusarium pseudoanthophilum</i> | 0       | 100%        | 70.53%     | KAF5573817.1   |
| polyketide synthase [Fusarium denticulatum]       | <i>Fusarium denticulatum</i>      | 0       | 100%        | 70.39%     | KAF5687147.1   |
| putative polyketide synthase [Fusarium bulbicola] | <i>Fusarium bulbicola</i>         | 0       | 99%         | 69.94%     | KAF5977424.1   |
| putative polyketide synthase [Fusarium sacchari]  | <i>Fusarium sacchari</i>          | 0       | 99%         | 70.69%     | ALQ32937.1     |
| putative polyketide synthase [Fusarium succisae]  | <i>Fusarium succisae</i>          | 0       | 99%         | 69.93%     | ALQ33023.1     |
| polyketide synthase [Fusarium mundagurra]         | <i>Fusarium mundagurra</i>        | 0       | 99%         | 69.81%     | KAF5716826.1   |

| <i>V. nonalfalfae_</i> VRPKS-I-17_NW_021167382                    |                                   |         |             |            |            |
|-------------------------------------------------------------------|-----------------------------------|---------|-------------|------------|------------|
| Gene name                                                         | Species of blast hit              | E value | Query Cover | Per. Ident | Accession  |
| Lovastatin diketide synthase LovF 16 [Colletotrichum chlorophyti] | <i>Colletotrichum chlorophyti</i> | 0       | 93%         | 70.29%     | OLN86478.1 |

|                                                                                 |                                              |   |     |        |                |
|---------------------------------------------------------------------------------|----------------------------------------------|---|-----|--------|----------------|
| polyketide synthase [Colletotrichum truncatum]                                  | <i>Colletotrichum truncatum</i>              | 0 | 93% | 69.53% | XP_036585096.1 |
| Reducing polyketide synthase PKS2 [Colletotrichum orbiculare MAFF 240422]       | <i>Colletotrichum orbiculare MAFF 240422</i> | 0 | 93% | 69.57% | TDZ25780.1     |
| Reducing polyketide synthase PKS2 [Colletotrichum sidae]                        | <i>Colletotrichum sidae</i>                  | 0 | 93% | 69.49% | TEA18683.1     |
| Reducing polyketide synthase PKS2 [Colletotrichum trifolii]                     | <i>Colletotrichum trifolii</i>               | 0 | 93% | 69.53% | TDZ28230.1     |
| Reducing polyketide synthase PKS2 [Colletotrichum spinosum]                     | <i>Colletotrichum spinosum</i>               | 0 | 93% | 69.44% | TDZ31026.1     |
| beta-ketoacyl synthase domain-containing protein [Colletotrichum salicis]       | <i>Colletotrichum salicis</i>                | 0 | 93% | 69.44% | KXH66496.1     |
| polyketide synthase [Colletotrichum musicola]                                   | <i>Colletotrichum musicola</i>               | 0 | 93% | 69.59% | KAF6830768.1   |
| beta-ketoacyl synthase domain-containing protein [Colletotrichum fioriniae PJ7] | <i>Colletotrichum fioriniae PJ7</i>          | 0 | 93% | 69.53% | EXF85385.1     |
| beta-ketoacyl synthase domain-containing protein [Colletotrichum scovillei]     | <i>Colletotrichum scovillei</i>              | 0 | 93% | 69.53% | XP_035338972.1 |

|                                                                           |                                 |         |             |            |              |
|---------------------------------------------------------------------------|---------------------------------|---------|-------------|------------|--------------|
| <i>V. nonalfalfae</i> _ VRPKS-I-19_NW_021167282                           |                                 |         |             |            |              |
| Gene name                                                                 | Species of blast hit            | E value | Query Cover | Per. Ident | Accession    |
| hypothetical protein J1614_005792 [Leptosphaeria biglobosa]               | <i>Leptosphaeria biglobosa</i>  | 0       | 99%         | 78.94%     | KAH9873394.1 |
| Reducing polyketide synthase PKS2 like protein [Verticillium longisporum] | <i>Verticillium longisporum</i> | 0       | 76%         | 94.62%     | KAG7126724.1 |
| Type I Iterative PKS [Claviceps purpurea]                                 | <i>Claviceps purpurea</i>       | 0       | 99%         | 62.24%     | KAG6264852.1 |
| Type I Iterative PKS [Claviceps purpurea]                                 | <i>Claviceps purpurea</i>       | 0       | 99%         | 62.24%     | KAG6168136.1 |
| Type I Iterative PKS [Claviceps purpurea]                                 | <i>Claviceps purpurea</i>       | 0       | 99%         | 62.15%     | KAG6172346.1 |
| Type I Iterative PKS [Claviceps purpurea]                                 | <i>Claviceps purpurea</i>       | 0       | 99%         | 62.19%     | KAG6257628.1 |
| Type I Iterative PKS [Claviceps purpurea]                                 | <i>Claviceps purpurea</i>       | 0       | 99%         | 62.19%     | KAG6178588.1 |
| Type I Iterative PKS [Claviceps purpurea]                                 | <i>Claviceps purpurea</i>       | 0       | 99%         | 62.19%     | KAG6152537.1 |
| Type I Iterative PKS [Claviceps purpurea]                                 | <i>Claviceps purpurea</i>       | 0       | 99%         | 62.10%     | KAG6313294.1 |
| Type I Iterative PKS [Claviceps purpurea]                                 | <i>Claviceps purpurea</i>       | 0       | 99%         | 62.15%     | KAG6319079.1 |

|                                                                                    |                                    |         |             |            |                |
|------------------------------------------------------------------------------------|------------------------------------|---------|-------------|------------|----------------|
| <i>V. nonalfalfae</i> _ VRPKS-I-23_NW_021167434                                    |                                    |         |             |            |                |
| Gene name                                                                          | Species of blast hit               | E value | Query Cover | Per. Ident | Accession      |
| phenolphthiocerol synthesis polyketide synthase ppsA [Sodiomyces alkalinus F11]    | <i>Sodiomyces alkalinus F11</i>    | 0       | 98%         | 50.04%     | XP_028462492.1 |
| phenolphthiocerol synthesis polyketide synthase ppsA [Plectosphaerella plurivora]  | <i>Plectosphaerella plurivora</i>  | 0       | 99%         | 44.46%     | KAH6697431.1   |
| phenolphthiocerol synthesis polyketide synthase ppsA [Plectosphaerella cucumerina] | <i>Plectosphaerella cucumerina</i> | 0       | 99%         | 44.51%     | KAH7358949.1   |
| beta-ketoacyl synthase domain-containing protein [Colletotrichum incanum]          | <i>Colletotrichum incanum</i>      | 0       | 99%         | 42.83%     | OHW97630.1     |

|                                                                                                    |                                              |   |     |        |              |
|----------------------------------------------------------------------------------------------------|----------------------------------------------|---|-----|--------|--------------|
| hypothetical protein BJF96_g3857 [Verticillium dahliae]                                            | <i>Verticillium dahliae</i>                  | 0 | 38% | 94.05% | PNH33126.1   |
| hypothetical protein G7046_g6445 [Stylonectria norvegica]                                          | <i>Stylonectria norvegica</i>                | 0 | 99% | 41.66% | KAF7555862.1 |
| polyketide synthase (beta-ketoacyl synthase domain-containing protein) [Colletotrichum tofieldiae] | <i>Colletotrichum tofieldiae</i>             | 0 | 97% | 42.90% | KZL67886.1   |
| Lovastatin diketide synthase LovF 13 [Colletotrichum chlorophyti]                                  | <i>Colletotrichum chlorophyti</i>            | 0 | 98% | 42.52% | OLN85715.1   |
| Reducing polyketide synthase FUB1 [Colletotrichum orbiculare MAFF 240422]                          | <i>Colletotrichum orbiculare MAFF 240422</i> | 0 | 97% | 43.44% | TDZ22788.1   |
| beta-ketoacyl synthase domain-containing protein [Colletotrichum incanum]                          | <i>Colletotrichum incanum</i>                | 0 | 97% | 42.83% | KZL83622.1   |

|                                                                                                                                                                       |                                |         |             |            |              |
|-----------------------------------------------------------------------------------------------------------------------------------------------------------------------|--------------------------------|---------|-------------|------------|--------------|
| <i>V. nonalfalfae</i> _VRPKS-I-26_NW_021167247                                                                                                                        |                                |         |             |            |              |
| Gene name                                                                                                                                                             | Species of blast hit           | E value | Query Cover | Per. Ident | Accession    |
| hypothetical protein F5B20DRAFT_586947 [Whalleya microplaca]                                                                                                          | <i>Whalleya microplaca</i>     | 0       | 97%         | 54.85%     | KAI1073750.1 |
| hypothetical protein DL768_003915 [Monosporascus sp. mg162]                                                                                                           | <i>Monosporascus sp. mg162</i> | 0       | 97%         | 54.66%     | RYP50633.1   |
| RecName: Full=Highly reducing polyketide synthase apmlA; Short=HRPKS apmlA; AltName: Full=Phaeosporide A biosynthesis cluster protein apmlA [Apiospora sphaerosperma] | <i>Apiospora sphaerosperma</i> | 0       | 97%         | 50.20%     | POCU84.1     |
| putative polyketide synthase [Xylariales sp. PMI_506]                                                                                                                 | <i>Xylariales sp. PMI_506</i>  | 0       | 93%         | 46.85%     | KAH8657763.1 |
| Fumagillin dodecapentaenoate synthase [Lachnellula willkommii]                                                                                                        | <i>Lachnellula willkommii</i>  | 0       | 95%         | 45.68%     | TVY89575.1   |
| Fumagillin dodecapentaenoate synthase [Lachnellula arida]                                                                                                             | <i>Lachnellula arida</i>       | 0       | 95%         | 45.54%     | TVY19100.1   |
| polyketide synthase 2 [Didymosphaeria enalia]                                                                                                                         | <i>Didymosphaeria enalia</i>   | 0       | 95%         | 45.61%     | KAF2259783.1 |
| hypothetical protein ACN38_g10438 [Penicillium nordicum]                                                                                                              | <i>Penicillium nordicum</i>    | 0       | 96%         | 45.84%     | KOS38742.1   |
| Fumagillin dodecapentaenoate synthase [Lachnellula cervina]                                                                                                           | <i>Lachnellula cervina</i>     | 0       | 95%         | 45.54%     | TVY51056.1   |
| hypothetical protein ACN42_g5244 [Penicillium freii]                                                                                                                  | <i>Penicillium freii</i>       | 0       | 95%         | 45.69%     | KUM61888.1   |

|                                                                                           |                                       |         |             |            |                |
|-------------------------------------------------------------------------------------------|---------------------------------------|---------|-------------|------------|----------------|
| <i>V. nonalfalfae</i> _VNRPKS-I-1_NW_021167324                                            |                                       |         |             |            |                |
| Gene name                                                                                 | Species of blast hit                  | E value | Query Cover | Per. Ident | Accession      |
| Conidial yellow pigment biosynthesis polyketide synthase [Colletotrichum gloeosporioides] | <i>Colletotrichum gloeosporioides</i> | 0       | 100%        | 75.72%     | XP_045268234.1 |
| beta-ketoacyl synthase [Colletotrichum sojae]                                             | <i>Colletotrichum sojae</i>           | 0       | 100%        | 76.16%     | KAF6807537.1   |
| Conidial yellow pigment biosynthesis polyketide synthase [Colletotrichum tropicale]       | <i>Colletotrichum tropicale</i>       | 0       | 100%        | 75.81%     | KAF4827098.1   |
| uncharacterized protein CkaCkLH20_00019 [Colletotrichum karsti]                           | <i>Colletotrichum karsti</i>          | 0       | 100%        | 75.93%     | XP_038751444.1 |
| hypothetical protein GQ607_010262 [Colletotrichum asianum]                                | <i>Colletotrichum asianum</i>         | 0       | 100%        | 75.76%     | KAF0322599.1   |
| hypothetical protein CcaCcLH18_10320 [Colletotrichum camelliae]                           | <i>Colletotrichum camelliae</i>       | 0       | 100%        | 75.49%     | KAH0426510.1   |

|                                                                                     |                                          |   |      |        |              |
|-------------------------------------------------------------------------------------|------------------------------------------|---|------|--------|--------------|
| Conidial yellow pigment biosynthesis polyketide synthase [Colletotrichum siamense]  | <i>Colletotrichum siamense</i>           | 0 | 100% | 75.67% | KAF4812766.1 |
| Conidial yellow pigment biosynthesis polyketide synthase [Colletotrichum fruticola] | <i>Colletotrichum fruticola</i>          | 0 | 100% | 75.72% | KAF4937522.1 |
| Conidial yellow pigment biosynthesis polyketide synthase [Colletotrichum viniferum] | <i>Colletotrichum viniferum</i>          | 0 | 100% | 75.72% | KAF4919737.1 |
| hypothetical protein K456DRAFT_1724748 [Colletotrichum gloeosporioides 23]          | <i>Colletotrichum gloeosporioides 23</i> | 0 | 100% | 75.67% | KAH9233890.1 |

|                                                                                                       |                                                 |           |             |            |                |
|-------------------------------------------------------------------------------------------------------|-------------------------------------------------|-----------|-------------|------------|----------------|
| <i>V. nonalfalfae</i> _VNRPKS-I-3_NW_021167257                                                        |                                                 |           |             |            |                |
| Gene name                                                                                             | Species of blast hit                            | E value   | Query Cover | Per. Ident | Accession      |
| phenolphthiocerol synthesis polyketide synthase ppsA [Sodiomyces alkalinus F11]                       | <i>Sodiomyces alkalinus F11</i>                 | 4.00E-131 | 87%         | 55.50%     | XP_028463040.1 |
| putative sterigmatocystin biosynthesis polyketide synthase [Tolypocladium ophioglossoides CBS 100239] | <i>Tolypocladium ophioglossoides CBS 100239</i> | 6.00E-117 | 91%         | 47.20%     | KND89106.1     |
| Polyketide synthase [Tolypocladium paradoxum]                                                         | <i>Tolypocladium paradoxum</i>                  | 2.00E-114 | 91%         | 46.47%     | POR35294.1     |
| hypothetical protein F4677DRAFT_278704 [Hypoxylon crocepeplum]                                        | <i>Hypoxylon crocepeplum</i>                    | 2.00E-100 | 92%         | 45.73%     | KAI1372052.1   |
| hypothetical protein F4802DRAFT_239318 [Xylaria palmicola]                                            | <i>Xylaria palmicola</i>                        | 2.00E-99  | 92%         | 48.00%     | KAI0409182.1   |
| hypothetical protein VDGD_20147 [Verticillium dahliae]                                                | <i>Verticillium dahliae</i>                     | 4.00E-99  | 35%         | 94.04%     | RBQ97855.1     |
| Beta-ketoacyl synthase [Macrophomina phaseolina MS6]                                                  | <i>Macrophomina phaseolina MS6</i>              | 3.00E-98  | 90%         | 42.56%     | EKG13225.1     |
| hypothetical protein GGR53DRAFT_500984 [Hypoxylon sp. FL1150]                                         | <i>Hypoxylon sp. FL1150</i>                     | 8.00E-96  | 83%         | 46.54%     | KAI1762632.1   |
| hypothetical protein B0I35DRAFT_407015 [Stachybotrys elegans]                                         | <i>Stachybotrys elegans</i>                     | 2.00E-95  | 91%         | 43.86%     | KAH7322541.1   |
| hypothetical protein F4680DRAFT_463425 [Xylaria scruposa]                                             | <i>Xylaria scruposa</i>                         | 5.00E-95  | 91%         | 44.19%     | KAI1746119.1   |

|                                                                                              |                                          |         |             |            |                |
|----------------------------------------------------------------------------------------------|------------------------------------------|---------|-------------|------------|----------------|
| <i>V. nonalfalfae</i> _PKS-III_NW_021167286                                                  |                                          |         |             |            |                |
| Gene name                                                                                    | Species of blast hit                     | E value | Query Cover | Per. Ident | Accession      |
| putative stilbene synthase 2 [Colletotrichum chlorophyti]                                    | <i>Colletotrichum chlorophyti</i>        | 0       | 100%        | 72.91%     | OLN95986.1     |
| chalcone and stilbene synthase domain-containing protein [Colletotrichum graminicola M1.001] | <i>Colletotrichum graminicola M1.001</i> | 0       | 100%        | 72.23%     | XP_008099452.1 |
| chalcone and stilbene synthase domain-containing protein [Colletotrichum tofieldiae]         | <i>Colletotrichum tofieldiae</i>         | 0       | 100%        | 72.40%     | GKT65818.1     |
| chalcone and stilbene synthase domain-containing protein [Plectosphaerella cucumerina]       | <i>Plectosphaerella cucumerina</i>       | 0       | 100%        | 73.08%     | KAH7375301.1   |
| Chalcone synthase [Colletotrichum tanacetii]                                                 | <i>Colletotrichum tanacetii</i>          | 0       | 100%        | 72.62%     | TKW57803.1     |
| chalcone synthase [Colletotrichum spaethianum]                                               | <i>Colletotrichum spaethianum</i>        | 0       | 100%        | 72.17%     | GJC81220.1     |
| chalcone and stilbene synthase domain-containing protein [Colletotrichum tofieldiae]         | <i>Colletotrichum tofieldiae</i>         | 0       | 100%        | 72.40%     | KZL74511.1     |

|                                                                                               |                                  |   |      |        |            |
|-----------------------------------------------------------------------------------------------|----------------------------------|---|------|--------|------------|
| chalcone synthase [Colletotrichum liriopes]                                                   | <i>Colletotrichum liriopes</i>   | 0 | 100% | 72.17% | GKT49639.1 |
| putative chalcone and stilbene synthase domain-containing protein [Colletotrichum sublineola] | <i>Colletotrichum sublineola</i> | 0 | 100% | 71.49% | KDN65911.1 |
| chalcone and stilbene synthase domain-containing protein [Colletotrichum incanum]             | <i>Colletotrichum incanum</i>    | 0 | 100% | 72.17% | KZL80557.1 |

|                                                                                  |                                              |         |             |            |                |
|----------------------------------------------------------------------------------|----------------------------------------------|---------|-------------|------------|----------------|
| <i>V. nonalfalfae</i> _VRPKS-I-11_NW_021167275                                   |                                              |         |             |            |                |
| Gene name                                                                        | Species of blast hit                         | E value | Query Cover | Per. Ident | Accession      |
| Nonribosomal peptide synthetase-like protein [Acremonium chrysogenum ATCC 11550] | <i>Acremonium chrysogenum ATCC 11550</i>     | 0       | 100%        | 47.99%     | KFH45364.1     |
| hypothetical protein F5Y06DRAFT_297186 [Hypoxylon sp. FL0890]                    | <i>Hypoxylon sp. FL0890</i>                  | 0       | 99%         | 46.42%     | KAI0837758.1   |
| uncharacterized protein BCR38DRAFT_413069 [Pseudomassariella vexata]             | <i>Pseudomassariella vexata</i>              | 0       | 100%        | 44.67%     | XP_040711562.1 |
| polyketide synthase [Lasiodiplodia theobromae]                                   | <i>Lasiodiplodia theobromae</i>              | 0       | 99%         | 43.48%     | KAF9630276.1   |
| Fusarin C synthetase [Lasiodiplodia theobromae]                                  | <i>Lasiodiplodia theobromae</i>              | 0       | 99%         | 43.52%     | KAB2573439.1   |
| Polyketide synthase [Lasiodiplodia theobromae]                                   | <i>Lasiodiplodia theobromae</i>              | 0       | 99%         | 43.27%     | XP_035374836.1 |
| uncharacterized protein K452DRAFT_243204 [Aplosporella prunicola CBS 121167]     | <i>Aplosporella prunicola CBS 121167</i>     | 0       | 99%         | 42.98%     | XP_033401020.1 |
| hypothetical protein Egran_04668 [Elaphomyces granulatus]                        | <i>Elaphomyces granulatus</i>                | 0       | 99%         | 42.09%     | OXV07567.1     |
| polyketide synthase, putative [Talaromyces stipitatus ATCC 10500]                | <i>Talaromyces stipitatus ATCC 10500</i>     | 0       | 99%         | 40.75%     | XP_002478535.1 |
| putative polyketide synthase [Aspergillus sclerotioniger CBS 115572]             | <i>Aspergillus sclerotioniger CBS 115572</i> | 0       | 99%         | 41.77%     | XP_025471949.1 |

|                                                                          |                                            |         |             |            |                |
|--------------------------------------------------------------------------|--------------------------------------------|---------|-------------|------------|----------------|
| <i>V. nonalfalfae</i> _VRPKS-I-9_NW_021167275                            |                                            |         |             |            |                |
| Gene name                                                                | Species of blast hit                       | E value | Query Cover | Per. Ident | Accession      |
| AMP-binding enzyme domain-containing protein [Hirsutella rhossiliensis]  | <i>Hirsutella rhossiliensis</i>            | 0       | 99%         | 70.68%     | XP_044717051.1 |
| hypothetical protein HIM_06709 [Hirsutella minnesotensis 3608]           | <i>Hirsutella minnesotensis 3608</i>       | 0       | 99%         | 63.63%     | KJZ73816.1     |
| lovastatin nonaketide synthase [Mollisia scopiformis]                    | <i>Mollisia scopiformis</i>                | 0       | 99%         | 48.67%     | XP_018063373.1 |
| lovastatin nonaketide synthase [Hypoxylon cercidicola]                   | <i>Hypoxylon cercidicola</i>               | 0       | 99%         | 45.81%     | KAI1772910.1   |
| lovastatin nonaketide synthase [Dactylonectria macrodidyma]              | <i>Dactylonectria macrodidyma</i>          | 0       | 99%         | 53.69%     | KAH7176829.1   |
| polyketide synthase 3 [Aspergillus steynii IBT 23096]                    | <i>Aspergillus steynii IBT 23096</i>       | 0       | 91%         | 45.41%     | XP_024699799.1 |
| lovastatin nonaketide synthase [Phaeosphaeria sp. MPI-PUGE-AT-0046c]     | <i>Phaeosphaeria sp. MPI-PUGE-AT-0046c</i> | 0       | 99%         | 43.27%     | KAH7408173.1   |
| putative Hybrid PKS-NRPS biosynthetic cluster [Verticillium nonalfalfae] | <i>Verticillium nonalfalfae</i>            | 0       | 94%         | 97.35%     | XP_028495009.1 |
| lovastatin nonaketide synthase [Aspergillus novofumigatus IBT 16806]     | <i>Aspergillus novofumigatus IBT 16806</i> | 0       | 99%         | 52.28%     | XP_024677790.1 |



|                                                     |                           |   |     |        |              |
|-----------------------------------------------------|---------------------------|---|-----|--------|--------------|
| lovastatin nonaketide synthase [Hypoxyton trugodes] | <i>Hypoxyton trugodes</i> | 0 | 99% | 49.95% | KAI1387791.1 |
|-----------------------------------------------------|---------------------------|---|-----|--------|--------------|

|                                                   |         |            |            |                                              |                  |
|---------------------------------------------------|---------|------------|------------|----------------------------------------------|------------------|
| <i>V. nubilum</i> _VRPKS-I-17_contig_NMXI01000001 |         |            |            |                                              |                  |
| Gene name                                         | E value | % Coverage | % identity | Top blast hit                                | Accession number |
| Lovastatin diketide synthase LovF 16              | 0       | 99%        | 70.16%     | <i>Colletotrichum chlorophyti</i>            | OLN86478.1       |
| polyketide synthase                               | 0       | 99%        | 69.63%     | <i>Colletotrichum truncatum</i>              | XP_036585096.1   |
| Reducing polyketide synthase PKS2                 | 0       | 99%        | 69.49%     | <i>Colletotrichum orbiculare MAFF 240422</i> | TDZ25780.1       |
| Reducing polyketide synthase PKS2                 | 0       | 99%        | 69.45%     | <i>Colletotrichum sidae</i>                  | TEA18683.1       |
| Reducing polyketide synthase PKS2                 | 0       | 99%        | 69.55%     | <i>Colletotrichum trifolii</i>               | TDZ28230.1       |
| Reducing polyketide synthase PKS2                 | 0       | 99%        | 69.41%     | <i>Colletotrichum spinosum</i>               | TDZ31026.1       |
| polyketide synthase                               | 0       | 99%        | 69.85%     | <i>Colletotrichum musicola</i>               | KAF6830768.1     |
| polyketide synthase                               | 0       | 99%        | 69.85%     | <i>Colletotrichum sojae</i>                  | KAF6806435.1     |
| beta-ketoacyl synthase domain-containing protein  | 0       | 99%        | 69.77%     | <i>Colletotrichum salicis</i>                | KXH66496.1       |
| polyketide synthase                               | 0       | 99%        | 69.85%     | <i>Colletotrichum plurivorum</i>             | KAF6821754.1     |

|                                                   |         |            |            |                                         |                  |
|---------------------------------------------------|---------|------------|------------|-----------------------------------------|------------------|
| <i>V. nubilum</i> _VRPKS-I-10_contig_NMXI01000076 |         |            |            |                                         |                  |
| Gene name                                         | E value | % Coverage | % identity | Top blast hit                           | Accession number |
| beta-ketoacyl synthase domain-containing protein  | 0       | 99%        | 54.33%     | <i>Coniochaeta sp. PMI_546</i>          | KAH8906691.1     |
| beta-ketoacyl synthase domain-containing protein  | 0       | 99%        | 54.00%     | <i>Coniochaeta ligniaria NRRL 30616</i> | OIW27845.1       |
| putative polyketide synthase                      | 0       | 99%        | 53.11%     | <i>Coniochaeta sp. 2T2.1</i>            | KAB5585722.1     |
| putative polyketide synthase                      | 0       | 99%        | 53.19%     | <i>Coniochaeta sp. 2T2.1</i>            | KAB5583401.1     |
| uncharacterized protein SMAC_05695                | 0       | 98%        | 52.35%     | <i>Sordaria macrospora k-hell</i>       | XP_003348600.1   |
| putative polyketide synthase                      | 0       | 98%        | 52.27%     | <i>Sordaria sp. MPI-SDFR-AT-0083</i>    | KAH7628050.1     |
| hypothetical protein NEUTE1DRAFT_85360            | 0       | 98%        | 51.78%     | <i>Neurospora tetrasperma FGSC 2508</i> | XP_009853076.1   |
| polyketide synthase 4                             | 0       | 98%        | 51.67%     | <i>Neurospora crassa OR74A</i>          | XP_011395279.1   |
| hypothetical protein M426DRAFT_261564             | 0       | 99%        | 50.77%     | <i>Hypoxyton sp. CI-4A</i>              | OTB04920.1       |
| beta-ketoacyl synthase domain-containing protein  | 0       | 99%        | 51.69%     | <i>Hypoxyton sp. FL0890</i>             | KAI0834000.1     |

|                                                   |         |            |            |                                   |                  |
|---------------------------------------------------|---------|------------|------------|-----------------------------------|------------------|
| <i>V. nubilum</i> _VNRPKS-I-4_contig_NMXI01000091 |         |            |            |                                   |                  |
| Gene name                                         | E value | % Coverage | % identity | Top blast hit                     | Accession number |
| putative FSP1                                     | 0       | 99%        | 68.09%     | <i>Dactylonectria macrodidyma</i> | KAH7133936.1     |
| putative FSP1                                     | 0       | 99%        | 66.55%     | <i>Ilyonectria destructans</i>    | KAH7019732.1     |
| putative polyketide synthase                      | 0       | 99%        | 61.40%     | <i>Fusarium sacchari</i>          | ALQ32938.1       |

|                                                  |   |     |        |                              |                |
|--------------------------------------------------|---|-----|--------|------------------------------|----------------|
| polyketide synthase                              | 0 | 99% | 61.68% | <i>Fusarium avenaceum</i>    | KIL88308.1     |
| beta-ketoacyl synthase domain-containing protein | 0 | 99% | 61.80% | <i>Fusarium proliferatum</i> | KAG4291688.1   |
| polyketide synthase                              | 0 | 99% | 61.11% | <i>Fusarium subglutinans</i> | XP_036537074.1 |
| putative polyketide synthase                     | 0 | 99% | 61.09% | <i>Fusarium anthophilum</i>  | ALQ32742.1     |
| polyketide synthase                              | 0 | 99% | 60.89% | <i>Fusarium coicis</i>       | KAF5983031.1   |
| putative type I polyketide synthase              | 0 | 99% | 61.47% | <i>Fusarium fujikuroi</i>    | KLP04343.1     |
| hypothetical protein LB506_008106                | 0 | 99% | 61.65% | <i>Fusarium annulatum</i>    | KAI1066549.1   |

|                                                   |         |            |            |                                      |                  |
|---------------------------------------------------|---------|------------|------------|--------------------------------------|------------------|
| <i>V. nubilum</i> _VRPKS-I-15_contig_NMXI01000091 |         |            |            |                                      |                  |
| Gene name                                         | E value | % Coverage | % identity | Top blast hit                        | Accession number |
| hypothetical protein EDB80DRAFT_632905            | 0       | 87%        | 68.74%     | <i>Ilyonectria destructans</i>       | KAH7019735.1     |
| hypothetical protein F5Y06DRAFT_304448            | 0       | 88%        | 65.45%     | <i>Hypoxylon sp. FL0890</i>          | KAI0842739.1     |
| hypothetical protein F5Y05DRAFT_417605            | 0       | 88%        | 64.94%     | <i>Hypoxylon sp. FL0543</i>          | KAI1134063.1     |
| hypothetical protein F5Y13DRAFT_179997            | 0       | 88%        | 64.96%     | <i>Hypoxylon sp. FL1857</i>          | KAI1412489.1     |
| hypothetical protein IL306_014406                 | 0       | 87%        | 62.92%     | <i>Fusarium sp. DS 682</i>           | KAF9768315.1     |
| polyketide synthase                               | 0       | 87%        | 62.15%     | <i>Fusarium avenaceum</i>            | KIL88312.1       |
| hypothetical protein DER45DRAFT_636326            | 0       | 87%        | 61.93%     | <i>Fusarium avenaceum</i>            | KAH6952055.1     |
| lijE                                              | 0       | 87%        | 62.58%     | <i>Ascomycota sp. F53</i>            | AMJ52084.1       |
| Type I Iterative Polyketide synthase (PKS)        | 0       | 87%        | 60.74%     | <i>Pseudogymnoascus sp. WSF 3629</i> | OBT39041.1       |
| Type I Iterative Polyketide synthase (PKS)        | 0       | 87%        | 60.12%     | <i>Pseudogymnoascus destructans</i>  | XP_024319559.1   |

|                                                   |         |            |            |                                     |                  |
|---------------------------------------------------|---------|------------|------------|-------------------------------------|------------------|
| <i>V. nubilum</i> _VRPKS-I-19_contig_NMXI01000024 |         |            |            |                                     |                  |
| Gene name                                         | E value | % Coverage | % identity | Top blast hit                       | Accession number |
| hypothetical protein J1614_005792                 | 0       | 100%       | 85.90%     | <i>Leptosphaeria biglobosa</i>      | KAH9873394.1     |
| Type I Polyketide synthase                        | 0       | 99%        | 81.78%     | <i>Verticillium nonalfalfae</i>     | XP_028494609.1   |
| Reducing polyketide synthase PKS2 like protein    | 0       | 99%        | 81.74%     | <i>Verticillium longisporum</i>     | KAG7143635.1     |
| fatty acid synthase S-acetyltransferase           | 0       | 99%        | 81.65%     | <i>Verticillium dahliae</i>         | KAH6703869.1     |
| hypothetical protein VD0004_g7884                 | 0       | 99%        | 81.37%     | <i>Verticillium dahliae</i>         | PNH38983.1       |
| fatty acid synthase S-acetyltransferase           | 0       | 99%        | 80.96%     | <i>Verticillium dahliae</i> VdLs.17 | XP_009655626.1   |
| hypothetical protein BN1708_003179                | 0       | 99%        | 81.10%     | <i>Verticillium longisporum</i>     | CRK18834.1       |
| Inositol 2-dehydrogenase 2                        | 0       | 96%        | 81.33%     | <i>Verticillium dahliae</i> VDG2    | KAF3346614.1     |
| hypothetical protein BN1708_009954                | 0       | 88%        | 81.02%     | <i>Verticillium longisporum</i>     | CRK10893.1       |
| hypothetical protein VDGD_03466                   | 0       | 87%        | 81.00%     | <i>Verticillium dahliae</i>         | RBQ87991.1       |

|                                                                        |         |            |            |                                     |                  |
|------------------------------------------------------------------------|---------|------------|------------|-------------------------------------|------------------|
| <i>V. nubilum_</i> VRPKS-I-21_contig_NMXI01000024                      |         |            |            |                                     |                  |
| Gene name                                                              | E value | % Coverage | % identity | Top blast hit                       | Accession number |
| Lovastatin diketide synthase LovF 2                                    | 0       | 100%       | 70.18%     | <i>Colletotrichum chlorophyti</i>   | OLN91972.1       |
| beta-ketoacyl synthase domain-containing protein                       | 0       | 100%       | 69.48%     | <i>Colletotrichum fioriniae PJ7</i> | EXF80608.1       |
| polyketide synthase                                                    | 0       | 99%        | 69.99%     | <i>Colletotrichum plurivorum</i>    | KAF6826616.1     |
| beta-ketoacyl synthase domain-containing protein                       | 0       | 100%       | 70.03%     | <i>Colletotrichum scovillei</i>     | KAG7053867.1     |
| polyketide synthase                                                    | 0       | 99%        | 69.91%     | <i>Colletotrichum musicola</i>      | KAF6845034.1     |
| polyketide synthase                                                    | 0       | 99%        | 69.95%     | <i>Colletotrichum sojae</i>         | KAF6809610.1     |
| beta-ketoacyl synthase domain-containing protein                       | 0       | 100%       | 69.75%     | <i>Colletotrichum simmondsii</i>    | KXH36687.1       |
| beta-ketoacyl synthase domain-containing protein                       | 0       | 100%       | 69.50%     | <i>Colletotrichum scovillei</i>     | XP_035330138.1   |
| polyketide synthase (beta-ketoacyl synthase domain-containing protein) | 0       | 100%       | 69.18%     | <i>Colletotrichum tofieldiae</i>    | KZL70949.1       |

|                                                                                                                                             |         |            |            |                                     |                  |
|---------------------------------------------------------------------------------------------------------------------------------------------|---------|------------|------------|-------------------------------------|------------------|
| <i>V. nubilum_</i> VRPKS-I-26_contig_NMXI01000023                                                                                           |         |            |            |                                     |                  |
| Gene name                                                                                                                                   | E value | % Coverage | % identity | Top blast hit                       | Accession number |
| hypothetical protein F5B20DRAFT_586947                                                                                                      | 0       | 99%        | 51.02%     | <i>Whalleya microplaca</i>          | KAI1073750.1     |
| hypothetical protein BN1708_001184                                                                                                          | 0       | 85%        | 62.42%     | <i>Verticillium longisporum</i>     | CRK33507.1       |
| hypothetical protein DL768_003915                                                                                                           | 0       | 99%        | 50.15%     | <i>Monosporascus sp. mg162</i>      | RYP50633.1       |
| mycocerosic acid synthase                                                                                                                   | 0       | 97%        | 65.61%     | <i>Verticillium dahliae</i> VdLs.17 | XP_009654470.1   |
| RecName: Full=Highly reducing polyketide synthase apmlA; Short=HRPKS apmlA; AltName: Full=Phaeospelide A biosynthesis cluster protein apmlA | 0       | 99%        | 49.11%     | <i>Apiospora sphaerosperma</i>      | P0CU84.1         |
| D-amino-acid oxidase                                                                                                                        | 0       | 80%        | 73.86%     | <i>Verticillium dahliae</i> VDG1    | KAF3356735.1     |
| Highly reducing polyketide synthase apmlA like protein                                                                                      | 0       | 74%        | 80.72%     | <i>Verticillium longisporum</i>     | KAG7100701.1     |
| Highly reducing polyketide synthase apmlA like protein                                                                                      | 0       | 45%        | 81.65%     | <i>Verticillium longisporum</i>     | KAG7141377.1     |
| hypothetical protein VDGD_07270                                                                                                             | 0       | 46%        | 78.75%     | <i>Verticillium dahliae</i>         | RBQ99134.1       |
| hypothetical protein ACN42_g5244                                                                                                            | 0       | 99%        | 41.93%     | <i>Penicillium freii</i>            | KUM61888.1       |

|                                                      |         |            |            |                                       |                  |
|------------------------------------------------------|---------|------------|------------|---------------------------------------|------------------|
| <i>V. nubilum_</i> VRPKS-I-23_contig_NMXI01000025    |         |            |            |                                       |                  |
| Gene name                                            | E value | % Coverage | % identity | Top blast hit                         | Accession number |
| phenolphthiocerol synthesis polyketide synthase ppsA | 0       | 99%        | 50.96%     | <i>Sodiomyces alkalinus F11</i>       | XP_028462492.1   |
| polyketide synthase                                  | 0       | 95%        | 67.90%     | <i>Verticillium nonalfalfae</i>       | XP_028490525.1   |
| lovastatin nonaketide synthase                       | 0       | 86%        | 68.52%     | <i>Verticillium alfalfae</i> VaMs.102 | XP_003007505.1   |
| phenolphthiocerol synthesis polyketide synthase ppsA | 0       | 99%        | 45.67%     | <i>Plectosphaerella plurivora</i>     | KAH6697431.1     |
| phenolphthiocerol synthesis polyketide synthase ppsA | 0       | 99%        | 46.03%     | <i>Plectosphaerella cucumerina</i>    | KAH7358949.1     |

|                                                                        |   |     |        |                                          |                |
|------------------------------------------------------------------------|---|-----|--------|------------------------------------------|----------------|
| beta-ketoacyl synthase domain-containing protein                       | 0 | 99% | 43.74% | <i>Colletotrichum incanum</i>            | OHW97630.1     |
| beta-ketoacyl synthase domain-containing protein                       | 0 | 97% | 43.76% | <i>Colletotrichum graminicola M1.001</i> | XP_008090783.1 |
| polyketide synthase (beta-ketoacyl synthase domain-containing protein) | 0 | 97% | 43.93% | <i>Colletotrichum tofieldiae</i>         | KZL67886.1     |
| Reducing polyketide synthase FUB1                                      | 0 | 97% | 43.65% | <i>Colletotrichum gloeosporioides</i>    | XP_045256339.1 |
| beta-ketoacyl synthase domain-containing protein                       | 0 | 97% | 42.96% | <i>Colletotrichum karsti</i>             | XP_038741012.1 |

|                                                                   |         |            |            |                                             |                  |
|-------------------------------------------------------------------|---------|------------|------------|---------------------------------------------|------------------|
| <i>V. nubilum</i> _PKS-III_contig_NMXI01000041                    |         |            |            |                                             |                  |
| Gene name                                                         | E value | % Coverage | % identity | Top blast hit                               | Accession number |
| chalcone and stilbene synthase domain-containing protein          | 0       | 100%       | 75.45%     | <i>Plectosphaerella cucumerina</i>          | KAH7375301.1     |
| type iii polyketide synthase                                      | 0       | 99%        | 75.79%     | <i>Colletotrichum camelliae</i>             | KAH0440190.1     |
| chalcone and stilbene synthase domain-containing protein          | 0       | 100%       | 74.43%     | <i>Colletotrichum graminicola M1.001</i>    | XP_008099452.1   |
| Stilbene synthase 3                                               | 0       | 99%        | 75.79%     | <i>Colletotrichum siamense</i>              | KAF4811812.1     |
| putative stilbene synthase 2                                      | 0       | 100%       | 74.43%     | <i>Colletotrichum chlorophyti</i>           | OLN95986.1       |
| Type III polyketide synthase B                                    | 0       | 98%        | 75.97%     | <i>Colletotrichum gloeosporioides</i>       | XP_045260893.1   |
| putative chalcone and stilbene synthase domain-containing protein | 0       | 100%       | 74.43%     | <i>Colletotrichum sublineola</i>            | KDN65911.1       |
| hypothetical protein CGLO_04899                                   | 0       | 98%        | 75.97%     | <i>Colletotrichum gloeosporioides Cg-14</i> | EQB55203.1       |
| Stilbene synthase 3                                               | 0       | 100%       | 73.87%     | <i>Colletotrichum aenigma</i>               | XP_037171847.1   |
| Stilbene synthase 3                                               | 0       | 99%        | 75.34%     | <i>Colletotrichum siamense</i>              | XP_036488664.1   |

|                                                           |         |            |            |                                       |                  |
|-----------------------------------------------------------|---------|------------|------------|---------------------------------------|------------------|
| <i>V. nubilum</i> _VRPKS-I-4_contig_NMXI01000015          |         |            |            |                                       |                  |
| Gene name                                                 | E value | % Coverage | % identity | Top blast hit                         | Accession number |
| hypothetical protein F4775DRAFT_593279                    | 0       | 99%        | 58.01%     | <i>Biscogniauxia sp. FL1348</i>       | KAI0597589.1     |
| hypothetical protein F5X96DRAFT_674085                    | 0       | 99%        | 58.07%     | <i>Biscogniauxia mediterranea</i>     | KAI1485991.1     |
| hypothetical protein F4809DRAFT_640890                    | 0       | 99%        | 57.96%     | <i>Biscogniauxia mediterranea</i>     | KAI1637132.1     |
| hypothetical protein BOTCAL_0139g00080                    | 0       | 99%        | 56.29%     | <i>Botryotinia calthae</i>            | TEY65541.1       |
| hypothetical protein BTUL_0001g00530                      | 0       | 99%        | 56.11%     | <i>Botrytis tulipae</i>               | TGO20046.1       |
| hypothetical protein BGAL_0408g00010                      | 0       | 99%        | 55.70%     | <i>Botrytis galanthina</i>            | THV46179.1       |
| hypothetical protein F5144DRAFT_655621                    | 0       | 99%        | 54.94%     | <i>Chaetomium globosum</i>            | KAH6628919.1     |
| hypothetical protein B7494_g1325                          | 0       | 99%        | 52.28%     | <i>Chlorociboria aeruginascens</i>    | TAQ90374.1       |
| Acyl transferase acyl hydrolase lysophospholipase protein | 0       | 99%        | 45.98%     | <i>Rutstroemia sp. NJR-2017a BVV2</i> | PQE27755.1       |
| hypothetical protein CJF32_00005378                       | 0       | 99%        | 46.24%     | <i>Rutstroemia sp. NJR-2017a WRK4</i> | PQE13487.1       |

| <i>V. tricornis</i> _VRPKS-I-17_contig_JPET01000002 |                                              |         |            |            |                  |
|-----------------------------------------------------|----------------------------------------------|---------|------------|------------|------------------|
| Gene name                                           | Species of BLAST hit                         | E-value | % coverage | % identity | Accession number |
| Lovastatin diketide synthase LovF 16                | <i>Colletotrichum chlorophyti</i>            | 0       | 92%        | 71.98%     | OLN86478.1       |
| polyketide synthase                                 | <i>Colletotrichum truncatum</i>              | 0       | 92%        | 71.55%     | XP_036585096.1   |
| Reducing polyketide synthase PKS2                   | <i>Colletotrichum trifolii</i>               | 0       | 92%        | 71.46%     | TDZ28230.1       |
| Reducing polyketide synthase PKS2                   | <i>Colletotrichum orbiculare</i> MAFF 240422 | 0       | 92%        | 71.42%     | TDZ25780.1       |
| Reducing polyketide synthase PKS2                   | <i>Colletotrichum sidae</i>                  | 0       | 92%        | 71.37%     | TEA18683.1       |
| Reducing polyketide synthase PKS2                   | <i>Colletotrichum spinosum</i>               | 0       | 92%        | 71.33%     | TDZ31026.1       |
| polyketide synthase                                 | <i>Colletotrichum sojae</i>                  | 0       | 92%        | 71.47%     | KAF6806435.1     |
| polyketide synthase                                 | <i>Colletotrichum musicola</i>               | 0       | 92%        | 71.68%     | KAF6830768.1     |
| fatty acid synthase S-acetyltransferase             | <i>Verticillium alfalfae</i> VaMs.102        | 0       | 91%        | 82.56%     | XP_003008481.1   |
| beta-ketoacyl synthase domain-containing protein    | <i>Colletotrichum nymphaeae</i> SA-01        | 0       | 92%        | 71.14%     | KXH49587.1       |

| <i>V. tricornis</i> _VRPKS-I-14_contig_JPET01000002 |                                          |         |            |            |                  |
|-----------------------------------------------------|------------------------------------------|---------|------------|------------|------------------|
| Gene name                                           | Species of BLAST hit                     | E-value | % coverage | % identity | Accession number |
| putative polyketide synthase                        | <i>Truncatella angustata</i>             | 0       | 100%       | 57.90%     | XP_045957259.1   |
| hypothetical protein AJ80_00462                     | <i>Polytolypa hystrix</i> UAMH7299       | 0       | 100%       | 55.29%     | PGH27912.1       |
| Nonribosomal peptide synthetase-like protein        | <i>Acremonium chrysogenum</i> ATCC 11550 | 0       | 99%        | 54.23%     | KFH40504.1       |
| uncharacterized protein B0I36DRAFT_397789           | <i>Microdochium trichocladiopsis</i>     | 0       | 98%        | 49.14%     | XP_046005243.1   |
| hypothetical protein TruAng_007522                  | <i>Truncatella angustata</i>             | 0       | 97%        | 54.99%     | KAH8198320.1     |
| Polyketide synthase                                 | <i>Penicillium</i> sp. RFL-2021a         | 0       | 99%        | 47.71%     | KAF7713846.1     |
| hypothetical protein PDE_03926                      | <i>Penicillium oxalicum</i> 114-2        | 0       | 100%       | 47.78%     | EPS28980.1       |
| Compactin diketide synthase mokB                    | <i>Penicillium rolsii</i>                | 0       | 99%        | 47.57%     | KAF3388919.1     |
| hypothetical protein PMG11_09333                    | <i>Penicillium brasilianum</i>           | 0       | 99%        | 47.54%     | CEJ60771.1       |
| Lovastatin diketide synthase LovF                   | <i>Penicillium subrubescens</i>          | 0       | 99%        | 47.83%     | OKP11696.1       |

| <i>V. tricornis</i> _VRPKS-I-16_contig_JPET01000001 |                                         |         |            |            |                  |
|-----------------------------------------------------|-----------------------------------------|---------|------------|------------|------------------|
| Gene name                                           | Species of BLAST hit                    | E-value | % coverage | % identity | Accession number |
| putative polyketide synthase                        | <i>Plectosphaerella cucumerina</i>      | 0       | 99%        | 72.03%     | KAH7369281.1     |
| putative polyketide synthase                        | <i>Plectosphaerella plurivora</i>       | 0       | 99%        | 71.33%     | KAH6673997.1     |
| hypothetical protein K402DRAFT_461387               | <i>Aulographum hederarum</i> CBS 113979 | 0       | 99%        | 49.89%     | KAF1988946.1     |
| uncharacterized protein K444DRAFT_592521            | <i>Hyaloscypha bicolor</i> E            | 0       | 99%        | 47.85%     | XP_024734639.1   |

|                                       |                                  |   |     |        |                |
|---------------------------------------|----------------------------------|---|-----|--------|----------------|
| hypothetical protein IFR05_000103     | <i>Cadophora sp. M221</i>        | 0 | 99% | 47.63% | KAG4444512.1   |
| putative polyketide synthase          | <i>Tothia fuscella</i>           | 0 | 99% | 47.70% | KAF2419578.1   |
| hypothetical protein CNMCM7691_001823 | <i>Aspergillus felis</i>         | 0 | 99% | 46.16% | KAF7182343.1   |
| hypothetical protein CDV56_109033     | <i>Aspergillus thermomutatus</i> | 0 | 99% | 45.61% | XP_026617693.1 |
| hypothetical protein IFM61606_05003   | <i>Aspergillus udagawae</i>      | 0 | 99% | 45.39% | GFG25074.1     |
| hypothetical protein CNMCM5623_002475 | <i>Aspergillus felis</i>         | 0 | 99% | 45.58% | KAF7169924.1   |

|                                                      |                                              |         |            |            |                  |
|------------------------------------------------------|----------------------------------------------|---------|------------|------------|------------------|
| <i>V. tricornis</i> _ VRPKS-I-25_contig_JPET01000001 |                                              |         |            |            |                  |
| Gene name                                            | Species of BLAST hit                         | E-value | % coverage | % identity | Accession number |
| hypothetical protein S40293_03578                    | <i>Stachybotrys chartarum IBT 40293</i>      | 0       | 99%        | 89.27%     | KFA46917.1       |
| hypothetical protein S40288_08039                    | <i>Stachybotrys chartarum IBT 40288</i>      | 0       | 99%        | 87.31%     | KFA72420.1       |
| hypothetical protein S7711_03851                     | <i>Stachybotrys chartarum IBT 7711</i>       | 0       | 86%        | 88.90%     | KEY68922.1       |
| hypothetical protein DL764_002272                    | <i>Monosporascus ibericus</i>                | 0       | 99%        | 56.31%     | RYP07817.1       |
| hypothetical protein B7494_g6164                     | <i>Chlorociboria aeruginascens</i>           | 0       | 99%        | 56.44%     | TAQ85507.1       |
| hypothetical protein DL770_006186                    | <i>Monosporascus sp. CRB-9-2</i>             | 0       | 99%        | 56.73%     | RYP80513.1       |
| type I iterative PKS                                 | <i>Aspergillus luchuensis</i>                | 0       | 99%        | 55.87%     | XP_041547082.1   |
| polyketide synthase                                  | <i>Aspergillus costaricaensis CBS 115574</i> | 0       | 99%        | 55.54%     | XP_025542753.1   |
| polyketide synthase                                  | <i>Aspergillus niger</i>                     | 0       | 99%        | 55.38%     | GAQ46573.1       |
| polyketide synthase                                  | <i>Aspergillus neoniger CBS 115656</i>       | 0       | 99%        | 55.54%     | XP_025484624.1   |

|                                                      |                                     |         |            |            |                  |
|------------------------------------------------------|-------------------------------------|---------|------------|------------|------------------|
| <i>V. tricornis</i> _ VRPKS-I-19_contig_JPET01000001 |                                     |         |            |            |                  |
| Gene name                                            | Species of BLAST hit                | E-value | % coverage | % identity | Accession number |
| hypothetical protein J1614_005792                    | <i>Leptosphaeria biglobosa</i>      | 0       | 99%        | 78.03%     | KAH9873394.1     |
| Type I Polyketide synthase                           | <i>Verticillium nonalfalfae</i>     | 0       | 100%       | 77.17%     | XP_028494609.1   |
| Reducing polyketide synthase PKS2 like protein       | <i>Verticillium longisporum</i>     | 0       | 100%       | 77.12%     | KAG7143635.1     |
| hypothetical protein VD0004_g7884                    | <i>Verticillium dahliae</i>         | 0       | 100%       | 77.08%     | PNH38983.1       |
| fatty acid synthase S-acetyltransferase              | <i>Verticillium dahliae</i>         | 0       | 100%       | 77.17%     | KAH6703869.1     |
| fatty acid synthase S-acetyltransferase              | <i>Verticillium dahliae VdLs.17</i> | 0       | 100%       | 76.48%     | XP_009655626.1   |
| hypothetical protein BN1708_003179                   | <i>Verticillium longisporum</i>     | 0       | 100%       | 76.56%     | CRK18834.1       |
| Inositol 2-dehydrogenase 2                           | <i>Verticillium dahliae VDG2</i>    | 0       | 96%        | 76.72%     | KAF3346614.1     |
| hypothetical protein BN1708_009954                   | <i>Verticillium longisporum</i>     | 0       | 88%        | 76.32%     | CRK10893.1       |
| hypothetical protein VDGD_03466                      | <i>Verticillium dahliae</i>         | 0       | 87%        | 76.66%     | RBQ87991.1       |

| <i>V. tricornis</i> _VRPKS-I-13_contig_JPET01000003 |                            |         |            |            |                  |
|-----------------------------------------------------|----------------------------|---------|------------|------------|------------------|
| Gene name                                           | Species of BLAST hit       | E-value | % coverage | % identity | Accession number |
| polyketide synthase                                 | <i>Fusarium avenaceum</i>  | 0       | 99%        | 55.19%     | KIL85244.1       |
| hypothetical protein BKA59DRAFT_387557              | <i>Fusarium tricinctum</i> | 0       | 99%        | 55.01%     | KAH7261591.1     |
| hypothetical protein DER45DRAFT_513901              | <i>Fusarium avenaceum</i>  | 0       | 99%        | 54.98%     | KAH6968136.1     |
| putative polyketide synthase                        | <i>Fusarium redolens</i>   | 0       | 99%        | 54.93%     | ALQ32917.1       |
| unnamed protein product                             | <i>Fusarium equiseti</i>   | 0       | 99%        | 55.00%     | CAG7561821.1     |
| polyketide synthase                                 | <i>Fusarium beomiforme</i> | 0       | 99%        | 54.58%     | KAF4341752.1     |
| hypothetical protein FGRMN_6861                     | <i>Fusarium gramineum</i>  | 0       | 99%        | 54.51%     | KAF4992917.1     |
| uncharacterized protein FVRRES_09355                | <i>Fusarium venenatum</i>  | 0       | 99%        | 54.52%     | XP_025592993.1   |
| hypothetical protein EDB82DRAFT_480382              | <i>Fusarium venenatum</i>  | 0       | 99%        | 54.49%     | KAH6966040.1     |
| uncharacterized protein BKA55DRAFT_692368           | <i>Fusarium redolens</i>   | 0       | 99%        | 54.74%     | XP_046047791.1   |

| <i>V. tricornis</i> _VRPKS-I-26_contig_JPET01000004 |                                        |          |            |            |                  |
|-----------------------------------------------------|----------------------------------------|----------|------------|------------|------------------|
| Gene name                                           | Species of BLAST hit                   | E-value  | % coverage | % identity | Accession number |
| hypothetical protein PENARI_c014G02915              | <i>Penicillium arizonense</i>          | 0.00E+00 | 99%        | 67.08%     | XP_022486633.1   |
| uncharacterized protein BGW36DRAFT_428643           | <i>Talaromyces proteolyticus</i>       | 0        | 99%        | 52.82%     | XP_046071584.1   |
| hypothetical protein ABOM_007875                    | <i>Aspergillus bombycis</i>            | 0.00E+00 | 99%        | 51.68%     | XP_022386052.1   |
| hypothetical protein BDV39DRAFT_200138              | <i>Aspergillus sergii</i>              | 0        | 99%        | 51.14%     | KAE8332518.1     |
| Type I Iterative PKS                                | <i>Purpureocillium takamizusanense</i> | 0        | 98%        | 52.22%     | UNI20497.1       |
| hypothetical protein CHU98_g7784                    | <i>Xylaria longipes</i>                | 0        | 99%        | 51.02%     | RYC58429.1       |
| KR domain protein                                   | <i>Aspergillus parasiticus SU-1</i>    | 0        | 99%        | 50.88%     | KJK67167.1       |
| hypothetical protein BDV41DRAFT_584626              | <i>Aspergillus transmontanensis</i>    | 0        | 99%        | 50.69%     | KAE8317099.1     |
| hypothetical protein G6O67_003088                   | <i>Ophiocordyceps sinensis</i>         | 0        | 98%        | 51.97%     | KAF4511277.1     |
| Type I Iterative PKS                                | <i>Eutypa lata</i>                     | 0        | 99%        | 49.18%     | KAI1254450.1     |

| <i>V. tricornis</i> _PKS-III_contig_JPET01000004                  |                                    |         |            |            |                  |
|-------------------------------------------------------------------|------------------------------------|---------|------------|------------|------------------|
| Gene name                                                         | Species of BLAST hit               | E-value | % coverage | % identity | Accession number |
| putative chalcone and stilbene synthase domain-containing protein | <i>Colletotrichum sublineola</i>   | 0       | 100%       | 73.65%     | KDN65911.1       |
| chalcone and stilbene synthase domain-containing protein          | <i>Plectosphaerella cucumerina</i> | 0       | 100%       | 75.45%     | KAH7375301.1     |
| chalcone and stilbene synthase domain-containing protein          | <i>Colletotrichum tofieldiae</i>   | 0       | 100%       | 73.65%     | GKT65818.1       |

|                                                          |                                          |   |      |        |                |
|----------------------------------------------------------|------------------------------------------|---|------|--------|----------------|
| chalcone synthase                                        | <i>Colletotrichum spaethianum</i>        | 0 | 100% | 73.42% | GJC81220.1     |
| chalcone and stilbene synthase domain-containing protein | <i>Colletotrichum graminicola M1.001</i> | 0 | 100% | 73.20% | XP_008099452.1 |
| chalcone and stilbene synthase domain-containing protein | <i>Colletotrichum tofieldiae</i>         | 0 | 100% | 73.42% | KZL74511.1     |
| chalcone and stilbene synthase                           | <i>Colletotrichum simmondsii</i>         | 0 | 100% | 72.75% | KXH46773.1     |
| chalcone and stilbene synthase domain-containing protein | <i>Colletotrichum incanum</i>            | 0 | 100% | 73.42% | KZL80557.1     |
| chalcone and stilbene synthase                           | <i>Colletotrichum scovillei</i>          | 0 | 100% | 72.52% | XP_035333635.1 |
| putative stilbene synthase 2                             | <i>Colletotrichum chlorophyti</i>        | 0 | 100% | 72.07% | OLN95986.1     |

| <i>V. tricornis</i> _ VRPKS-I-23_contig_JPET01000002                   |                                              |         |            |            |                  |
|------------------------------------------------------------------------|----------------------------------------------|---------|------------|------------|------------------|
| Gene name                                                              | Species of BLAST hit                         | E-value | % coverage | % identity | Accession number |
| phenolphthiocerol synthesis polyketide synthase ppsA                   | <i>Sodiomyces alkalinus F11</i>              | 0       | 99%        | 51.56%     | XP_028462492.1   |
| polyketide synthase                                                    | <i>Verticillium nonalfalfae</i>              | 0       | 95%        | 64.92%     | XP_028490525.1   |
| phenolphthiocerol synthesis polyketide synthase ppsA                   | <i>Plectosphaerella plurivora</i>            | 0       | 99%        | 46.02%     | KAH6697431.1     |
| phenolphthiocerol synthesis polyketide synthase ppsA                   | <i>Plectosphaerella cucumerina</i>           | 0       | 99%        | 45.54%     | KAH7358949.1     |
| beta-ketoacyl synthase domain-containing protein                       | <i>Colletotrichum incanum</i>                | 0       | 99%        | 44.85%     | OHW97630.1       |
| Lovastatin diketide synthase LovF 13                                   | <i>Colletotrichum chlorophyti</i>            | 0       | 99%        | 44.06%     | OLN85715.1       |
| beta-ketoacyl synthase domain-containing protein                       | <i>Colletotrichum karsti</i>                 | 0       | 98%        | 44.21%     | XP_038741012.1   |
| beta-ketoacyl synthase domain-containing protein                       | <i>Colletotrichum graminicola M1.001</i>     | 0       | 98%        | 45.27%     | XP_008090783.1   |
| polyketide synthase (beta-ketoacyl synthase domain-containing protein) | <i>Colletotrichum tofieldiae</i>             | 0       | 98%        | 44.92%     | KZL67886.1       |
| Reducing polyketide synthase FUB1                                      | <i>Colletotrichum orbiculare MAFF 240422</i> | 0       | 98%        | 44.64%     | TDZ22788.1       |

| <i>V. tricornis</i> _ VRPKS-I-12_contig_JPET01000002 |                                       |         |            |            |                  |
|------------------------------------------------------|---------------------------------------|---------|------------|------------|------------------|
| Gene name                                            | Species of BLAST hit                  | E-value | % coverage | % identity | Accession number |
| polyketide synthase                                  | <i>Sodiomyces alkalinus F11</i>       | 0       | 96%        | 75.43%     | XP_028469272.1   |
| beta-ketoacyl synthase domain-containing protein     | <i>Colletotrichum fioriniae PJ7</i>   | 0       | 96%        | 72.70%     | EXF80071.1       |
| beta-ketoacyl synthase domain-containing protein     | <i>Colletotrichum salicis</i>         | 0       | 96%        | 72.61%     | KXH33485.1       |
| beta-ketoacyl synthase domain-containing protein     | <i>Colletotrichum nymphaeae SA-01</i> | 0       | 96%        | 72.56%     | KXH30697.1       |
| beta-ketoacyl synthase domain-containing protein     | <i>Colletotrichum scovillei</i>       | 0       | 96%        | 72.52%     | XP_035338903.1   |
| beta-ketoacyl synthase domain-containing protein     | <i>Colletotrichum orchidophilum</i>   | 0       | 96%        | 72.49%     | XP_022470047.1   |
| beta-ketoacyl synthase domain-containing protein     | <i>Colletotrichum simmondsii</i>      | 0       | 96%        | 72.52%     | KXH41720.1       |
| polyketide synthase                                  | <i>Pochonia chlamydosporia 170</i>    | 0       | 96%        | 65.91%     | XP_018147207.1   |
| hypothetical protein G7Z17_g6123                     | <i>Cylindrodendrum hubeiense</i>      | 0       | 96%        | 65.64%     | KAF7549858.1     |



|                     |                           |   |     |        |              |
|---------------------|---------------------------|---|-----|--------|--------------|
| polyketide synthase | <i>Thelonectria olida</i> | 0 | 96% | 65.90% | KAH6899708.1 |
|---------------------|---------------------------|---|-----|--------|--------------|

|                                                          |                                             |         |            |            |                  |
|----------------------------------------------------------|---------------------------------------------|---------|------------|------------|------------------|
| <i>V. tricornis</i> _ VNRPKS-I-1_contig_JPET01000002     |                                             |         |            |            |                  |
| Gene name                                                | Species of BLAST hit                        | E-value | % coverage | % identity | Accession number |
| uncharacterized protein CkaCkLH20_00019                  | <i>Colletotrichum karsti</i>                | 0       | 100%       | 79.19%     | XP_038751444.1   |
| hypothetical protein CGLO_05047                          | <i>Colletotrichum gloeosporioides</i> Cg-14 | 0       | 100%       | 79.05%     | EQB55056.1       |
| hypothetical protein GQ607_010262                        | <i>Colletotrichum asianum</i>               | 0       | 100%       | 79.01%     | KAF0322599.1     |
| hypothetical protein K456DRAFT_1724748                   | <i>Colletotrichum gloeosporioides</i> 23    | 0       | 100%       | 79.01%     | KAH9233890.1     |
| Conidial yellow pigment biosynthesis polyketide synthase | <i>Colletotrichum fructicola</i>            | 0       | 100%       | 79.01%     | KAF4937522.1     |
| hypothetical protein CcaCeLH18_10320                     | <i>Colletotrichum camelliae</i>             | 0       | 100%       | 79.05%     | KAH0426510.1     |
| Conidial yellow pigment biosynthesis polyketide synthase | <i>Colletotrichum gloeosporioides</i>       | 0       | 100%       | 79.01%     | XP_045268234.1   |
| Conidial yellow pigment biosynthesis polyketide synthase | <i>Colletotrichum fructicola</i>            | 0       | 100%       | 78.96%     | XP_031880204.1   |
| Conidial yellow pigment biosynthesis polyketide synthase | <i>Colletotrichum viniferum</i>             | 0       | 100%       | 78.96%     | KAF4919737.1     |
| Conidial yellow pigment biosynthesis polyketide synthase | <i>Colletotrichum siamense</i>              | 0       | 100%       | 78.91%     | KAF4812766.1     |

|                                                     |                                            |         |            |            |                  |
|-----------------------------------------------------|--------------------------------------------|---------|------------|------------|------------------|
| <i>V. tricornis</i> _ VRPKS-I-5_contig_JPET01000008 |                                            |         |            |            |                  |
| Gene name                                           | Species of BLAST hit                       | E-value | % coverage | % identity | Accession number |
| AMP-binding enzyme domain-containing protein        | <i>Hirsutella rhossiliensis</i>            | 0       | 99%        | 71.29%     | XP_044717051.1   |
| lovastatin nonaketide synthase                      | <i>Verticillium alfalfae</i> VaMs.102      | 0       | 100%       | 68.07%     | XP_003005392.1   |
| hypothetical protein HIM_06709                      | <i>Hirsutella minnesotensis</i> 3608       | 0       | 99%        | 64.00%     | KJZ73816.1       |
| lovastatin nonaketide synthase                      | <i>Aspergillus novofumigatus</i> IBT 16806 | 0       | 100%       | 53.29%     | XP_024677790.1   |
| lovastatin nonaketide synthase                      | <i>Hypoxylon trugodes</i>                  | 0       | 99%        | 51.85%     | KAI1387791.1     |
| lovastatin nonaketide synthase                      | <i>Dactylonectria macrodidyma</i>          | 0       | 98%        | 55.88%     | KAH7176829.1     |
| hypothetical protein DL768_008516                   | <i>Monosporascus</i> sp. mg162             | 0       | 99%        | 50.60%     | RYP45085.1       |
| hypothetical protein JX265_007707                   | <i>Wardomyces moseri</i>                   | 0       | 99%        | 49.76%     | KAI1866406.1     |
| lovastatin nonaketide synthase                      | <i>Mollisia scopiformis</i>                | 0       | 99%        | 47.61%     | XP_018063373.1   |
| hypothetical protein DSL72_003306                   | <i>Monilinia vaccinii-corymbosi</i>        | 0       | 90%        | 45.46%     | QSZ28801.1       |

|                                                     |                                  |         |            |            |                  |
|-----------------------------------------------------|----------------------------------|---------|------------|------------|------------------|
| <i>V. tricornis</i> _ VRPKS-I-2_contig_JPET01000003 |                                  |         |            |            |                  |
| Gene name                                           | Species of BLAST hit             | E-value | % coverage | % identity | Accession number |
| Fusaridione A synthetase fsdS                       | <i>Colletotrichum fructicola</i> | 0       | 90%        | 85.90%     | KAF4886526.1     |
| Fusaridione A synthetase                            | <i>Colletotrichum fructicola</i> | 0       | 90%        | 85.88%     | XP_031875985.1   |

|                                        |                                      |   |     |        |                |
|----------------------------------------|--------------------------------------|---|-----|--------|----------------|
| ChaA                                   | <i>Chaetomium olivaceum</i>          | 0 | 90% | 54.35% | QJX57338.1     |
| hypothetical protein UA08_04451        | <i>Talaromyces atrovireus</i>        | 0 | 89% | 54.59% | XP_020120442.1 |
| polyketide synthase                    | <i>Saccharata proteae CBS 121410</i> | 0 | 89% | 49.03% | KAF2084690.1   |
| polyketide synthetase                  | <i>Mollisia scopiformis</i>          | 0 | 89% | 47.73% | XP_018074800.1 |
| XenE                                   | <i>Xenoacremonium sp. BF-2018a</i>   | 0 | 89% | 46.80% | QOJ72663.1     |
| hypothetical protein PENSTE_c011G08446 | <i>Penicillium steckii</i>           | 0 | 89% | 46.94% | OQE21884.1     |
| polyketide synthetase                  | <i>Xylaria acuta</i>                 | 0 | 89% | 46.56% | KAI0452050.1   |
| fusaridione A synthetase fsdS          | <i>Colletotrichum spaethianum</i>    | 0 | 89% | 45.75% | GJC90835.1     |

|                                                    |                                  |         |            |            |                  |
|----------------------------------------------------|----------------------------------|---------|------------|------------|------------------|
| <i>V. tricornis</i> _ VPKS-I-6_contig_JPET01000003 |                                  |         |            |            |                  |
| Gene name                                          | Species of BLAST hit             | E-value | % coverage | % identity | Accession number |
| hypothetical protein BDV25DRAFT_139560             | <i>Aspergillus avenaceus</i>     | 0       | 99%        | 66.86%     | KAE8150730.1     |
| hypothetical protein ETB97_012280                  | <i>Aspergillus burnettii</i>     | 0       | 99%        | 66.24%     | KAF5861957.1     |
| uncharacterized protein BDW43DRAFT_306247          | <i>Aspergillus alliaceus</i>     | 0       | 99%        | 66.27%     | XP_031905223.1   |
| hypothetical protein BDV23DRAFT_181744             | <i>Aspergillus alliaceus</i>     | 0       | 99%        | 66.31%     | KAE8392342.1     |
| hypothetical protein DL764_009059                  | <i>Monosporascus ibericus</i>    | 0       | 99%        | 61.80%     | RYO86086.1       |
| hypothetical protein DL769_003084                  | <i>Monosporascus sp. CRB-8-3</i> | 0       | 99%        | 61.31%     | RYP78994.1       |
| hypothetical protein DL765_005547                  | <i>Monosporascus sp. GIB2</i>    | 0       | 99%        | 61.50%     | RYP15707.1       |
| hypothetical protein BCR34DRAFT_599754             | <i>Clohesyomyces aquaticus</i>   | 0       | 91%        | 65.92%     | ORY13581.1       |
| hypothetical protein GGR56DRAFT_680577             | <i>Xylariaceae sp. FL0804</i>    | 0       | 99%        | 61.16%     | KAI0484820.1     |
| hypothetical protein CC78DRAFT_565861              | <i>Didymosphaeria enalia</i>     | 0       | 91%        | 65.77%     | KAF2268091.1     |

|                                                   |                                        |         |            |            |                  |
|---------------------------------------------------|----------------------------------------|---------|------------|------------|------------------|
| <i>V.tricornis</i> _ VPKS-I-5_contig_JPET01000007 |                                        |         |            |            |                  |
| Gene name                                         | Species of BLAST hit                   | E-value | % coverage | % identity | Accession number |
| hypothetical protein F4775DRAFT_593279            | <i>Biscogniauxia sp. FL1348</i>        | 0       | 96%        | 65.60%     | KAI0597589.1     |
| hypothetical protein F5X96DRAFT_674085            | <i>Biscogniauxia mediterranea</i>      | 0       | 96%        | 65.14%     | KAI1485991.1     |
| hypothetical protein F4809DRAFT_640890            | <i>Biscogniauxia mediterranea</i>      | 0       | 96%        | 65.29%     | KAI1637132.1     |
| hypothetical protein B0I37DRAFT_446777            | <i>Chaetomium sp. MPI-CAGE-AT-0009</i> | 0       | 96%        | 64.22%     | KAH6844804.1     |
| hypothetical protein F5144DRAFT_655621            | <i>Chaetomium globosum</i>             | 0       | 96%        | 64.06%     | KAH6628919.1     |
| hypothetical protein BTUL_0001g00530              | <i>Botrytis tulipae</i>                | 0       | 96%        | 61.55%     | TGO20046.1       |
| hypothetical protein BOTCAL_0139g00080            | <i>Botryotinia calthae</i>             | 0       | 96%        | 61.02%     | TEY65541.1       |

|                                      |                                       |   |     |        |            |
|--------------------------------------|---------------------------------------|---|-----|--------|------------|
| hypothetical protein BGAL_0408g00010 | <i>Botrytis galanthina</i>            | 0 | 96% | 60.90% | THV46179.1 |
| hypothetical protein B7494_g1325     | <i>Chlorociboria aeruginascens</i>    | 0 | 96% | 48.64% | TAQ90374.1 |
| hypothetical protein CJF32_00005378  | <i>Rutstroemia sp. NJR-2017a WRK4</i> | 0 | 96% | 43.81% | PQE13487.1 |

| <i>V. zaregamsianum_ VRPKS-I-17_NMXM01000005</i> |                                              |            |            |         |                  |
|--------------------------------------------------|----------------------------------------------|------------|------------|---------|------------------|
| Gene name                                        | Species of blast hit                         | % coverage | % identity | E value | Accession number |
| Lovastatin diketide synthase LovF 16             | <i>Colletotrichum chlorophyti</i>            | 99%        | 72.06%     | 0       | OLN86478.1       |
| polyketide synthase                              | <i>Colletotrichum truncatum</i>              | 99%        | 71.59%     | 0       | XP_036585096.1   |
| Reducing polyketide synthase PKS2                | <i>Colletotrichum trifolii</i>               | 99%        | 71.63%     | 0       | TDZ28230.1       |
| Reducing polyketide synthase PKS2                | <i>Colletotrichum orbiculare MAFF 240422</i> | 99%        | 71.58%     | 0       | TDZ25780.1       |
| Reducing polyketide synthase PKS2                | <i>Colletotrichum sidae</i>                  | 99%        | 71.54%     | 0       | TEA18683.1       |
| Reducing polyketide synthase PKS2                | <i>Colletotrichum spinosum</i>               | 99%        | 71.50%     | 0       | TDZ31026.1       |
| polyketide synthase                              | <i>Colletotrichum musicola</i>               | 99%        | 71.69%     | 0       | KAF6830768.1     |
| polyketide synthase                              | <i>Colletotrichum sojae</i>                  | 99%        | 71.48%     | 0       | KAF6806435.1     |
| beta-ketoacyl synthase domain-containing protein | <i>Colletotrichum nymphaeae SA-01</i>        | 99%        | 71.34%     | 0       | KXH49587.1       |
| beta-ketoacyl synthase domain-containing protein | <i>Colletotrichum simmondsii</i>             | 99%        | 71.27%     | 0       | KXH44475.1       |

| <i>V. zaregamsianum_ VRPKS-I-23_NMXM01000005</i>     |                                              |            |            |         |                  |
|------------------------------------------------------|----------------------------------------------|------------|------------|---------|------------------|
| Gene name                                            | Species of blast hit                         | % coverage | % identity | E value | Accession number |
| phenolphthiocerol synthesis polyketide synthase ppsA | <i>Sodiomyces alkalinus F11</i>              | 99%        | 51.93%     | 0       | XP_028462492.1   |
| phenolphthiocerol synthesis polyketide synthase ppsA | <i>Plectosphaerella plurivora</i>            | 99%        | 45.93%     | 0       | KAH6697431.1     |
| phenolphthiocerol synthesis polyketide synthase ppsA | <i>Plectosphaerella cucumerina</i>           | 99%        | 44.91%     | 0       | KAH7358949.1     |
| Lovastatin diketide synthase LovF 13                 | <i>Colletotrichum chlorophyti</i>            | 99%        | 44.03%     | 0       | OLN85715.1       |
| beta-ketoacyl synthase domain-containing protein     | <i>Colletotrichum incanum</i>                | 99%        | 44.29%     | 0       | OHW97630.1       |
| beta-ketoacyl synthase domain-containing protein     | <i>Colletotrichum karsti</i>                 | 98%        | 44.46%     | 0       | XP_038741012.1   |
| Reducing polyketide synthase FUB1                    | <i>Colletotrichum orbiculare MAFF 240422</i> | 98%        | 44.52%     | 0       | TDZ22788.1       |
| beta-ketoacyl synthase domain-containing protein     | <i>Colletotrichum graminicola M1.001</i>     | 98%        | 44.89%     | 0       | XP_008090783.1   |

|                                                                        |                                  |     |        |   |            |
|------------------------------------------------------------------------|----------------------------------|-----|--------|---|------------|
| Reducing polyketide synthase FUB1                                      | <i>Colletotrichum trifolii</i>   | 98% | 44.32% | 0 | TDZ29218.1 |
| polyketide synthase (beta-ketoacyl synthase domain-containing protein) | <i>Colletotrichum tofieldiae</i> | 98% | 44.47% | 0 | KZL67886.1 |

| <i>V. zaregamsianum_ VRPKS-I-16_NMXM01000004</i> |                                            |            |            |         |                  |
|--------------------------------------------------|--------------------------------------------|------------|------------|---------|------------------|
| Gene name                                        | Species of blast hit                       | % coverage | % identity | E value | Accession number |
| putative polyketide synthase                     | <i>Plectosphaerella cucumerina</i>         | 99%        | 72.07%     | 0       | KAH7369281.1     |
| putative polyketide synthase                     | <i>Plectosphaerella plurivora</i>          | 99%        | 71.59%     | 0       | KAH6673997.1     |
| hypothetical protein K402DRAFT_461387            | <i>Aulographum hederæ CBS 113979</i>       | 99%        | 50.23%     | 0       | KAF1988946.1     |
| hypothetical protein L207DRAFT_422368            | <i>Hyaloscypha variabilis F</i>            | 99%        | 48.85%     | 0       | PMD43053.1       |
| hypothetical protein DL98DRAFT_477463            | <i>Cadophora sp. DSE1049</i>               | 99%        | 48.15%     | 0       | PVH88801.1       |
| uncharacterized protein K444DRAFT_592521         | <i>Hyaloscypha bicolor E</i>               | 99%        | 47.94%     | 0       | XP_024734639.1   |
| hypothetical protein IFR05_000103                | <i>Cadophora sp. M221</i>                  | 99%        | 47.58%     | 0       | KAG4444512.1     |
| putative polyketide synthase                     | <i>Tothia fuscella</i>                     | 99%        | 48.01%     | 0       | KAF2419578.1     |
| hypothetical protein NA56DRAFT_673334            | <i>Hyaloscypha hepaticicola</i>            | 99%        | 46.19%     | 0       | PMD16306.1       |
| putative polyketide synthase                     | <i>Phaeosphaeria sp. MPI-PUGE-AT-0046c</i> | 98%        | 45.29%     | 0       | KAH7402395.1     |
| hypothetical protein CNMCM7691_001823            | <i>Aspergillus felis</i>                   | 99%        | 45.76%     | 0       | KAF7182343.1     |

| <i>V. zaregamsianum_ VRPKS-I-25_NMXM01000004</i> |                                         |            |            |         |                  |
|--------------------------------------------------|-----------------------------------------|------------|------------|---------|------------------|
| Gene name                                        | Species of blast hit                    | % coverage | % identity | E value | Accession number |
| hypothetical protein S40293_03578                | <i>Stachybotrys chartarum IBT 40293</i> | 99%        | 91.30%     | 0       | KFA46917.1       |
| hypothetical protein S40288_08039                | <i>Stachybotrys chartarum IBT 40288</i> | 99%        | 89.17%     | 0       | KFA72420.1       |
| hypothetical protein S7711_03851                 | <i>Stachybotrys chartarum IBT 7711</i>  | 86%        | 90.99%     | 0       | KEY68922.1       |
| hypothetical protein DL770_006186                | <i>Monosporascus sp. CRB-9-2</i>        | 99%        | 57.05%     | 0       | RYP80513.1       |
| hypothetical protein B7494_g6164                 | <i>Chlorociboria aeruginascens</i>      | 99%        | 56.56%     | 0       | TAQ85507.1       |
| hypothetical protein DL764_002272                | <i>Monosporascus ibericus</i>           | 99%        | 56.64%     | 0       | RYP07817.1       |
| type I iterative PKS                             | <i>Aspergillus luchuensis</i>           | 99%        | 55.86%     | 0       | XP_041547082.1   |
| polyketide synthase                              | <i>Aspergillus neoniger CBS 115656</i>  | 99%        | 55.72%     | 0       | XP_025484624.1   |

|                     |                                             |     |        |   |                |
|---------------------|---------------------------------------------|-----|--------|---|----------------|
| polyketide synthase | <i>Aspergillus costaricensis CBS 115574</i> | 99% | 55.59% | 0 | XP_025542753.1 |
| polyketide synthase | <i>Aspergillus niger</i>                    | 99% | 55.55% | 0 | GAQ46573.1     |

|                                                        |                                         |            |            |         |                  |
|--------------------------------------------------------|-----------------------------------------|------------|------------|---------|------------------|
| <i>V. zaregamsianum_VRPKS-I-18_contig_NMXM01000001</i> |                                         |            |            |         |                  |
| Gene name                                              | Species of blast hit                    | % coverage | % identity | E value | Accession number |
| Reducing polyketide synthase PKS2                      | <i>Fulvia fulva</i>                     | 79%        | 77.41%     | 0       | UJO18003.1       |
| Polyketide synthase                                    | <i>Tolypocladium paradoxum</i>          | 78%        | 68.05%     | 0       | POR36838.1       |
| Polyketide synthase                                    | <i>Tolypocladium capitatum</i>          | 78%        | 68.22%     | 0       | PNY26863.1       |
| polyketide synthase                                    | <i>Thelonectria olida</i>               | 78%        | 65.50%     | 0       | KAH6887502.1     |
| hypothetical protein FDECE_8493                        | <i>Fusarium decemcellulare</i>          | 78%        | 64.87%     | 0       | KAF5005076.1     |
| Lovastatin diketide synthase mokB                      | <i>Trichoderma lentiforme</i>           | 78%        | 64.94%     | 0       | KAF3065508.1     |
| fatty acid synthase S-acetyltransferase                | <i>Trichoderma harzianum</i>            | 78%        | 64.98%     | 0       | KKO98752.1       |
| hypothetical protein THARTR1_06994                     | <i>Trichoderma harzianum</i>            | 78%        | 65.12%     | 0       | PNP52390.1       |
| hypothetical protein CONLIGDRAFT_690934                | <i>Coniochaeta ligniaria NRRL 30616</i> | 78%        | 64.48%     | 0       | OIW25172.1       |
| hypothetical protein VHEMI00830                        | <i>Torribiella hemipterigena</i>        | 78%        | 62.90%     | 0       | CEJ80659.1       |

|                                                       |                                  |            |            |         |                  |
|-------------------------------------------------------|----------------------------------|------------|------------|---------|------------------|
| <i>V. zaregamsianum_VRPKS-I-6_contig_NMXM01000001</i> |                                  |            |            |         |                  |
| Gene name                                             | Species of blast hit             | % coverage | % identity | E value | Accession number |
| hypothetical protein BDV25DRAFT_139560                | <i>Aspergillus avenaceus</i>     | 99%        | 67.20%     | 0       | KAE8150730.1     |
| hypothetical protein ETB97_012280                     | <i>Aspergillus burnettii</i>     | 99%        | 66.88%     | 0       | KAF5861957.1     |
| hypothetical protein BDV23DRAFT_181744                | <i>Aspergillus alliaceus</i>     | 99%        | 66.76%     | 0       | KAE8392342.1     |
| uncharacterized protein BDW43DRAFT_306247             | <i>Aspergillus alliaceus</i>     | 99%        | 66.74%     | 0       | XP_031905223.1   |
| hypothetical protein DL764_009059                     | <i>Monosporascus ibericus</i>    | 99%        | 61.94%     | 0       | RYO86086.1       |
| hypothetical protein DL769_003084                     | <i>Monosporascus sp. CRB-8-3</i> | 99%        | 61.35%     | 0       | RYP78994.1       |
| hypothetical protein DL765_005547                     | <i>Monosporascus sp. GIB2</i>    | 99%        | 61.53%     | 0       | RYP15707.1       |
| hypothetical protein BCR34DRAFT_599754                | <i>Clohesyomyces aquaticus</i>   | 91%        | 66.30%     | 0       | ORY13581.1       |
| hypothetical protein GGR56DRAFT_680577                | <i>Xylariaceae sp. FL0804</i>    | 99%        | 61.37%     | 0       | KAI0484820.1     |
| hypothetical protein CC78DRAFT_565861                 | <i>Didymosphaeria enalia</i>     | 91%        | 66.23%     | 0       | KAF2268091.1     |

|                                                       |  |  |  |  |  |
|-------------------------------------------------------|--|--|--|--|--|
| <i>V. zaregamsianum_VRPKS-I-7_contig_NMXM01000002</i> |  |  |  |  |  |
|-------------------------------------------------------|--|--|--|--|--|

| Gene name                                                 | Species of blast hit                | % coverage | % identity | E value | Accession number |
|-----------------------------------------------------------|-------------------------------------|------------|------------|---------|------------------|
| polyketide synthase dehydratase domain-containing protein | <i>Sarocladium implicatum</i>       | 96%        | 78.19%     | 0       | KAH8169122.1     |
| hypothetical protein BDV25DRAFT_168001                    | <i>Aspergillus avenaceus</i>        | 96%        | 58.44%     | 0       | KAE8154018.1     |
| hypothetical protein F5B20DRAFT_519373                    | <i>Whalleya microplaca</i>          | 96%        | 57.63%     | 0       | KAI1085697.1     |
| uncharacterized protein ASPWEDRAFT_42595                  | <i>Aspergillus wentii</i> DTO 134E9 | 96%        | 58.29%     | 0       | XP_040688298.1   |
| putative polyketide synthase                              | <i>Hypoxylon sp. FL1284</i>         | 96%        | 56.15%     | 0       | KAI0169670.1     |
| hypothetical protein ACN38_g5709                          | <i>Penicillium nordicum</i>         | 96%        | 56.06%     | 0       | KOS43405.1       |
| Beta-ketoacyl synthase                                    | <i>Penicillium camemberti</i>       | 96%        | 56.15%     | 0       | CRL31206.1       |
| hypothetical protein HAV15_003755                         | <i>Penicillium sp. str. #12</i>     | 96%        | 56.03%     | 0       | KAF4765052.1     |
| hypothetical protein ETB97_004590                         | <i>Aspergillus burnettii</i>        | 96%        | 56.11%     | 0       | KAF5858310.1     |
| hypothetical protein BDV23DRAFT_185642                    | <i>Aspergillus alliaceus</i>        | 96%        | 55.88%     | 0       | KAE8388153.1     |

| <i>V. zaregamsianum_ VRPKS-I-26_contig_NMXM01000003</i>                                                                                     |                                     |            |            |         |                  |
|---------------------------------------------------------------------------------------------------------------------------------------------|-------------------------------------|------------|------------|---------|------------------|
| Gene name                                                                                                                                   | Species of blast hit                | % coverage | % identity | E value | Accession number |
| hypothetical protein F5B20DRAFT_586947                                                                                                      | <i>Whalleya microplaca</i>          | 99%        | 52.38%     | 0       | KAI1073750.1     |
| hypothetical protein DL768_003915                                                                                                           | <i>Monosporascus sp. mg162</i>      | 99%        | 51.63%     | 0       | RYP50633.1       |
| RecName: Full=Highly reducing polyketide synthase apmlA; Short=HRPKS apmlA; AltName: Full=Phaeosporide A biosynthesis cluster protein apmlA | <i>Apiospora sphaerosperma</i>      | 99%        | 50.46%     | 0       | P0CU84.1         |
| hypothetical protein ACN38_g10438                                                                                                           | <i>Penicillium nordicum</i>         | 98%        | 43.83%     | 0       | KOS38742.1       |
| hypothetical protein ACN42_g5244                                                                                                            | <i>Penicillium freii</i>            | 98%        | 43.04%     | 0       | KUM61888.1       |
| hypothetical protein PENPOL_c017G09878                                                                                                      | <i>Penicillium polonicum</i>        | 98%        | 43.27%     | 0       | OQD61348.1       |
| reducing type I polyketide synthase                                                                                                         | <i>Xylariomycetidae sp. FL2044</i>  | 99%        | 42.58%     | 0       | KAH9902283.1     |
| reducing type I polyketide synthase                                                                                                         | <i>Annulohypoxylon maeteangense</i> | 98%        | 42.68%     | 0       | KAI0883761.1     |
| Fumagillin dodecapentaenoate synthase                                                                                                       | <i>Lachnellula willkommii</i>       | 99%        | 42.62%     | 0       | TVY89575.1       |
| Fumagillin dodecapentaenoate synthase                                                                                                       | <i>Lachnellula arida</i>            | 99%        | 42.58%     | 0       | TVY19100.1       |

| <i>V. zaregamsianum_ VNRPKS-I-2_contig_NMXM01000003</i> |                               |            |            |         |                  |
|---------------------------------------------------------|-------------------------------|------------|------------|---------|------------------|
| Gene name                                               | Species of blast hit          | % coverage | % identity | E value | Accession number |
| hypothetical protein DL764_006210                       | <i>Monosporascus ibericus</i> | 100%       | 84.68%     | 0       | RYP01440.1       |
| uncharacterized protein BGZ61DRAFT_593032               | <i>Ilyonectria robusta</i>    | 99%        | 79.46%     | 0       | XP_046097594.1   |

|                                        |                                                 |     |        |   |                |
|----------------------------------------|-------------------------------------------------|-----|--------|---|----------------|
| PKS16 protein                          | <i>Ilyonectria destructans</i>                  | 98% | 79.36% | 0 | KAH7000898.1   |
| hypothetical protein BKA56DRAFT_558919 | <i>Ilyonectria sp. MPI-CAGE-AT-0026</i>         | 99% | 79.01% | 0 | KAH6970569.1   |
| PKS16 protein                          | <i>Dactylonectria estremocensis</i>             | 99% | 79.36% | 0 | KAH7155810.1   |
| PKS16 protein                          | <i>Dactylonectria macrodidyma</i>               | 98% | 77.81% | 0 | KAH7120608.1   |
| PKS16 protein                          | <i>Corynespora cassicola Philippines</i>        | 99% | 59.38% | 0 | PSN68069.1     |
| uncharacterized protein INS49_005730   | <i>Diaporthe citri</i>                          | 85% | 59.40% | 0 | XP_043027652.1 |
| PKS16 protein                          | <i>Rhexocercosporidium sp. MPI-PUGE-AT-0058</i> | 99% | 52.10% | 0 | KAH7357101.1   |
| polyketide synthase                    | <i>Leptodontidium sp. 2 PMI_412</i>             | 99% | 52.31% | 0 | KAH9225058.1   |

|                                                         |                                          |            |            |         |                  |
|---------------------------------------------------------|------------------------------------------|------------|------------|---------|------------------|
| <i>V. zaregamsianum_ VRPKS-I-14_contig_NMXM01000009</i> |                                          |            |            |         |                  |
| Gene name                                               | Species of blast hit                     | % coverage | % identity | E value | Accession number |
| putative polyketide synthase                            | <i>Truncatella angustata</i>             | 100%       | 56.98%     | 0       | XP_045957259.1   |
| hypothetical protein TruAng_007522                      | <i>Truncatella angustata</i>             | 100%       | 56.47%     | 0       | KAH8198320.1     |
| Nonribosomal peptide synthetase-like protein            | <i>Acremonium chrysogenum ATCC 11550</i> | 99%        | 53.95%     | 0       | KFH40504.1       |
| hypothetical protein AJ80_00462                         | <i>Polytolypa hystericis UAMH7299</i>    | 100%       | 54.29%     | 0       | PGH27912.1       |
| uncharacterized protein B0I36DRAFT_397789               | <i>Microdochium trichocladiopsis</i>     | 97%        | 48.37%     | 0       | XP_046005243.1   |
| Polyketide synthase                                     | <i>Penicillium sp. RFL-2021a</i>         | 99%        | 46.52%     | 0       | KAF7713846.1     |
| hypothetical protein PDE_03926                          | <i>Penicillium oxalicum 114-2</i>        | 99%        | 46.08%     | 0       | EPS28980.1       |
| Compactin diketide synthase mokB                        | <i>Penicillium rolsii</i>                | 99%        | 46.40%     | 0       | KAF3388919.1     |
| Lovastatin diketide synthase LovF                       | <i>Penicillium subrubescens</i>          | 99%        | 46.34%     | 0       | OKP11696.1       |
| hypothetical protein PMG11_09333                        | <i>Penicillium brasilianum</i>           | 99%        | 46.26%     | 0       | CEJ60771.1       |

|                                                         |                                   |            |            |         |                  |
|---------------------------------------------------------|-----------------------------------|------------|------------|---------|------------------|
| <i>V. zaregamsianum_ VRPKS-I-21_contig_NMXM01000006</i> |                                   |            |            |         |                  |
| Gene name                                               | Species of blast hit              | % coverage | % identity | E value | Accession number |
| Lovastatin diketide synthase LovF 2                     | <i>Colletotrichum chlorophyti</i> | 100%       | 74.50%     | 0       | OLN91972.1       |

|                                                                        |                                       |      |        |   |                |
|------------------------------------------------------------------------|---------------------------------------|------|--------|---|----------------|
| polyketide synthase                                                    | <i>Colletotrichum plurivorum</i>      | 100% | 74.12% | 0 | KAF6826616.1   |
| polyketide synthase                                                    | <i>Colletotrichum musicola</i>        | 100% | 74.08% | 0 | KAF6845034.1   |
| beta-ketoacyl synthase domain-containing protein                       | <i>Colletotrichum fiorinae PJ7</i>    | 100% | 73.52% | 0 | EXF80608.1     |
| polyketide synthase (beta-ketoacyl synthase domain-containing protein) | <i>Colletotrichum tofieldiae</i>      | 100% | 73.65% | 0 | KZL70949.1     |
| beta-ketoacyl synthase domain-containing protein                       | <i>Colletotrichum scovillei</i>       | 100% | 73.90% | 0 | KAG7053867.1   |
| polyketide synthase                                                    | <i>Colletotrichum sojae</i>           | 100% | 74.16% | 0 | KAF6809610.1   |
| beta-ketoacyl synthase domain-containing protein                       | <i>Colletotrichum simmondsii</i>      | 100% | 73.77% | 0 | KXH36687.1     |
| beta-ketoacyl synthase domain-containing protein                       | <i>Colletotrichum scovillei</i>       | 100% | 73.29% | 0 | XP_035330138.1 |
| beta-ketoacyl synthase domain-containing protein                       | <i>Colletotrichum nymphaeae</i> SA-01 | 100% | 73.94% | 0 | KXH46086.1     |

|                                                         |                                     |            |            |         |                  |
|---------------------------------------------------------|-------------------------------------|------------|------------|---------|------------------|
| <i>V. zaregamsianum_ VRPKS-I-19_contig_NMXM01000013</i> |                                     |            |            |         |                  |
| Gene name                                               | Species of blast hit                | % coverage | % identity | E value | Accession number |
| hypothetical protein J1614_005792                       | <i>Leptosphaeria biglobosa</i>      | 99%        | 75.93%     | 0       | KAH9873394.1     |
| polyketide synthase                                     | <i>Metarhizium rileyi RCEF 4871</i> | 99%        | 62.67%     | 0       | OAA35905.1       |
| Type I Iterative PKS                                    | <i>Claviceps pusilla</i>            | 99%        | 63.13%     | 0       | KAG6001262.1     |
| Type I Iterative PKS                                    | <i>Claviceps purpurea</i>           | 99%        | 62.95%     | 0       | KAG6313294.1     |
| Type I Iterative PKS                                    | <i>Claviceps purpurea</i>           | 98%        | 62.74%     | 0       | KAG6145386.1     |
| Type I Iterative PKS                                    | <i>Claviceps purpurea</i>           | 99%        | 62.90%     | 0       | KAG6319079.1     |
| Type I Iterative PKS                                    | <i>Claviceps aff. purpurea</i>      | 99%        | 62.95%     | 0       | KAG6303654.1     |
| Type I Iterative PKS                                    | <i>Claviceps sp. LM454 group G7</i> | 99%        | 62.93%     | 0       | KAG6106452.1     |
| Type I Iterative PKS                                    | <i>Claviceps purpurea</i>           | 99%        | 62.86%     | 0       | KAG6144460.1     |
| Type I Iterative PKS                                    | <i>Claviceps purpurea</i>           | 99%        | 62.86%     | 0       | KAG6278039.1     |

|                                                         |                                             |            |            |         |                  |
|---------------------------------------------------------|---------------------------------------------|------------|------------|---------|------------------|
| <i>V. zaregamsianum_ VNRPKS-I-1_contig_NMXM01000005</i> |                                             |            |            |         |                  |
| Gene name                                               | Species of blast hit                        | % coverage | % identity | E value | Accession number |
| hypothetical protein CcaCcLH18_10320                    | <i>Colletotrichum camelliae</i>             | 100%       | 79.05%     | 0       | KAH0426510.1     |
| uncharacterized protein CkaCkLH20_00019                 | <i>Colletotrichum karsti</i>                | 100%       | 79.37%     | 0       | XP_038751444.1   |
| hypothetical protein CGLO_05047                         | <i>Colletotrichum gloeosporioides Cg-14</i> | 100%       | 79.23%     | 0       | EQB55056.1       |
| hypothetical protein GQ607_010262                       | <i>Colletotrichum asianum</i>               | 100%       | 79.19%     | 0       | KAF0322599.1     |



|                                                          |                                          |      |        |   |                |
|----------------------------------------------------------|------------------------------------------|------|--------|---|----------------|
| Conidial yellow pigment biosynthesis polyketide synthase | <i>Colletotrichum gloeosporioides</i>    | 100% | 79.19% | 0 | XP_045268234.1 |
| hypothetical protein K456DRAFT_1724748                   | <i>Colletotrichum gloeosporioides</i> 23 | 100% | 79.19% | 0 | KAH9233890.1   |
| Conidial yellow pigment biosynthesis polyketide synthase | <i>Colletotrichum fruticola</i>          | 100% | 79.19% | 0 | KAF4937522.1   |
| Conidial yellow pigment biosynthesis polyketide synthase | <i>Colletotrichum fruticola</i>          | 100% | 79.14% | 0 | XP_031880204.1 |
| Conidial yellow pigment biosynthesis polyketide synthase | <i>Colletotrichum siamense</i>           | 100% | 79.14% | 0 | KAF4840476.1   |
| Conidial yellow pigment biosynthesis polyketide synthase | <i>Colletotrichum fruticola</i>          | 100% | 79.14% | 0 | KAF4912855.1   |

|                                                           |                                       |            |            |         |                  |
|-----------------------------------------------------------|---------------------------------------|------------|------------|---------|------------------|
| <i>V. zaregamsianum</i> _VRPKS-I-5_contig_NMXM01000008    |                                       |            |            |         |                  |
| Gene name                                                 | Species of blast hit                  | % coverage | % identity | E value | Accession number |
| hypothetical protein F4775DRAFT_593279                    | <i>Biscogniauxia</i> sp. FL1348       | 99%        | 65.91%     | 0       | KAI0597589.1     |
| hypothetical protein F5144DRAFT_655621                    | <i>Chaetomium globosum</i>            | 99%        | 64.38%     | 0       | KAH6628919.1     |
| hypothetical protein B7494_g1325                          | <i>Chlorociboria aeruginascens</i>    | 99%        | 48.92%     | 0       | TAQ90374.1       |
| hypothetical protein BTUL_0001g00530                      | <i>Botrytis tulipae</i>               | 98%        | 63.97%     | 0       | TGO20046.1       |
| hypothetical protein BOTCAL_0139g00080                    | <i>Botryotinia calthae</i>            | 98%        | 63.26%     | 0       | TEY65541.1       |
| hypothetical protein BGAL_0408g00010                      | <i>Botrytis galanthina</i>            | 98%        | 62.99%     | 0       | THV46179.1       |
| Acyl transferase acyl hydrolase lysophospholipase protein | <i>Rutstroemia</i> sp. NJR-2017a BVV2 | 100%       | 43.84%     | 0       | PQE27755.1       |
| hypothetical protein CJF32_00005378                       | <i>Rutstroemia</i> sp. NJR-2017a WRK4 | 100%       | 44.00%     | 0       | PQE13487.1       |
| Acyl transferase/acyl hydrolase/lysophospholipase         | <i>Penicillium italicum</i>           | 99%        | 42.86%     | 0       | KGO65245.1       |
| hypothetical protein F5Y04DRAFT_286173                    | <i>Hypomontagnella monticulosa</i>    | 99%        | 42.62%     | 0       | KAI0376194.1     |

|                                                        |                                        |            |            |         |                  |
|--------------------------------------------------------|----------------------------------------|------------|------------|---------|------------------|
| <i>V. zaregamsianum</i> _VRPKS-I-1_contig_NMXM01000001 |                                        |            |            |         |                  |
| Gene name                                              | Species of blast hit                   | % coverage | % identity | E value | Accession number |
| putative hybrid NRPS/PKS enzyme                        | <i>Didymosphaeria enalia</i>           | 99%        | 44.80%     | 0       | KAF2268646.1     |
| related to polyketide synthase                         | <i>Phialocephala subalpina</i>         | 99%        | 44.15%     | 0       | CZR58354.1       |
| hypothetical protein V492_07950                        | <i>Pseudogymnoascus</i> sp. VKM F-4246 | 99%        | 43.67%     | 0       | KFY06571.1       |
| Acetyl-CoA synthetase-like protein                     | <i>Glarea lozoyensis</i> ATCC 20868    | 99%        | 43.59%     | 0       | XP_008078954.1   |
| polyketide synthase                                    | <i>Halenospora varia</i>               | 99%        | 43.55%     | 0       | KAH6673321.1     |
| polyketide synthase                                    | <i>Saccharata proteae</i> CBS 121410   | 99%        | 43.33%     | 0       | KAF2084690.1     |

|                                                  |                                       |     |        |   |                |
|--------------------------------------------------|---------------------------------------|-----|--------|---|----------------|
| amino acid adenylation domain-containing protein | <i>Hymenoscyphus varicosporioides</i> | 95% | 44.64% | 0 | KAH8646967.1   |
| hypothetical protein UREG_03815                  | <i>Uncinocarpus reesii 1704</i>       | 99% | 42.07% | 0 | XP_002544298.1 |
| uncharacterized protein BP5553_06488             | <i>Venustampulla echinocandica</i>    | 99% | 42.97% | 0 | XP_031868532.1 |
| hypothetical protein IFR04_013564                | <i>Cadophora malorum</i>              | 99% | 41.74% | 0 | KAG4413304.1   |

|                                                        |                             |            |            |         |                  |
|--------------------------------------------------------|-----------------------------|------------|------------|---------|------------------|
| <i>V. zaregamsianum_ VPRKS-I-6_contig_NMXM01000001</i> |                             |            |            |         |                  |
| Gene name                                              | Species of blast hit        | % coverage | % identity | E value | Accession number |
| polyketide synthase                                    | <i>Fusarium avenaceum</i>   | 99%        | 55.53%     | 0       | KIL85244.1       |
| hypothetical protein BKA59DRAFT_387557                 | <i>Fusarium tricinctum</i>  | 99%        | 55.28%     | 0       | KAH7261591.1     |
| hypothetical protein DER45DRAFT_513901                 | <i>Fusarium avenaceum</i>   | 99%        | 55.22%     | 0       | KAH6968136.1     |
| putative polyketide synthase                           | <i>Fusarium redolens</i>    | 99%        | 55.26%     | 0       | ALQ32917.1       |
| unnamed protein product                                | <i>Fusarium equiseti</i>    | 99%        | 55.07%     | 0       | CAG7561821.1     |
| unnamed protein product                                | <i>Fusarium graminearum</i> | 99%        | 54.73%     | 0       | VTO93732.1       |
| polyketide synthase                                    | <i>Fusarium beomiforme</i>  | 99%        | 55.14%     | 0       | KAF4341752.1     |
| unnamed protein product                                | <i>Fusarium graminearum</i> | 99%        | 54.76%     | 0       | CZS84488.1       |
| unnamed protein product                                | <i>Fusarium graminearum</i> | 99%        | 54.73%     | 0       | CAF3461387.1     |
| unnamed protein product                                | <i>Fusarium graminearum</i> | 99%        | 54.73%     | 0       | CAG2002135.1     |

|                                                                   |                                          |            |            |         |                  |
|-------------------------------------------------------------------|------------------------------------------|------------|------------|---------|------------------|
| <i>V. zaregamsianum_PKS-III_contig_NMXM01000003</i>               |                                          |            |            |         |                  |
| Gene name                                                         | Species of blast hit                     | % coverage | % identity | E value | Accession number |
| putative chalcone and stilbene synthase domain-containing protein | <i>Colletotrichum sublineola</i>         | 100%       | 75.06%     | 0       | KDN65911.1       |
| chalcone and stilbene synthase domain-containing protein          | <i>Colletotrichum tofieldiae</i>         | 100%       | 75.45%     | 0       | GKT65818.1       |
| chalcone synthase                                                 | <i>Colletotrichum spaethianum</i>        | 100%       | 75.23%     | 0       | GJC81220.1       |
| chalcone and stilbene synthase domain-containing protein          | <i>Plectosphaerella cucumerina</i>       | 100%       | 76.46%     | 0       | KAH7375301.1     |
| chalcone and stilbene synthase domain-containing protein          | <i>Colletotrichum tofieldiae</i>         | 100%       | 75.23%     | 0       | KZL74511.1       |
| chalcone and stilbene synthase domain-containing protein          | <i>Colletotrichum incanum</i>            | 100%       | 75.23%     | 0       | KZL80557.1       |
| chalcone and stilbene synthase domain-containing protein          | <i>Colletotrichum truncatum</i>          | 100%       | 75.28%     | 0       | XP_036586176.1   |
| putative chalcone and stilbene synthase domain-containing protein | <i>Colletotrichum incanum</i>            | 100%       | 75.00%     | 0       | OHW96035.1       |
| chalcone synthase                                                 | <i>Colletotrichum liriopes</i>           | 100%       | 74.77%     | 0       | GKT49639.1       |
| chalcone and stilbene synthase domain-containing protein          | <i>Colletotrichum graminicola M1.001</i> | 100%       | 74.61%     | 0       | XP_008099452.1   |
